# Supplementary material for: The landscape of transcriptional and translational changes over 22 years of bacterial adaptation
Source: eLife journal article supplement (doi:10.7554/elife.81979), 2022-10-10
Supplement: supp [file elife-81979-supp-v1.zip]

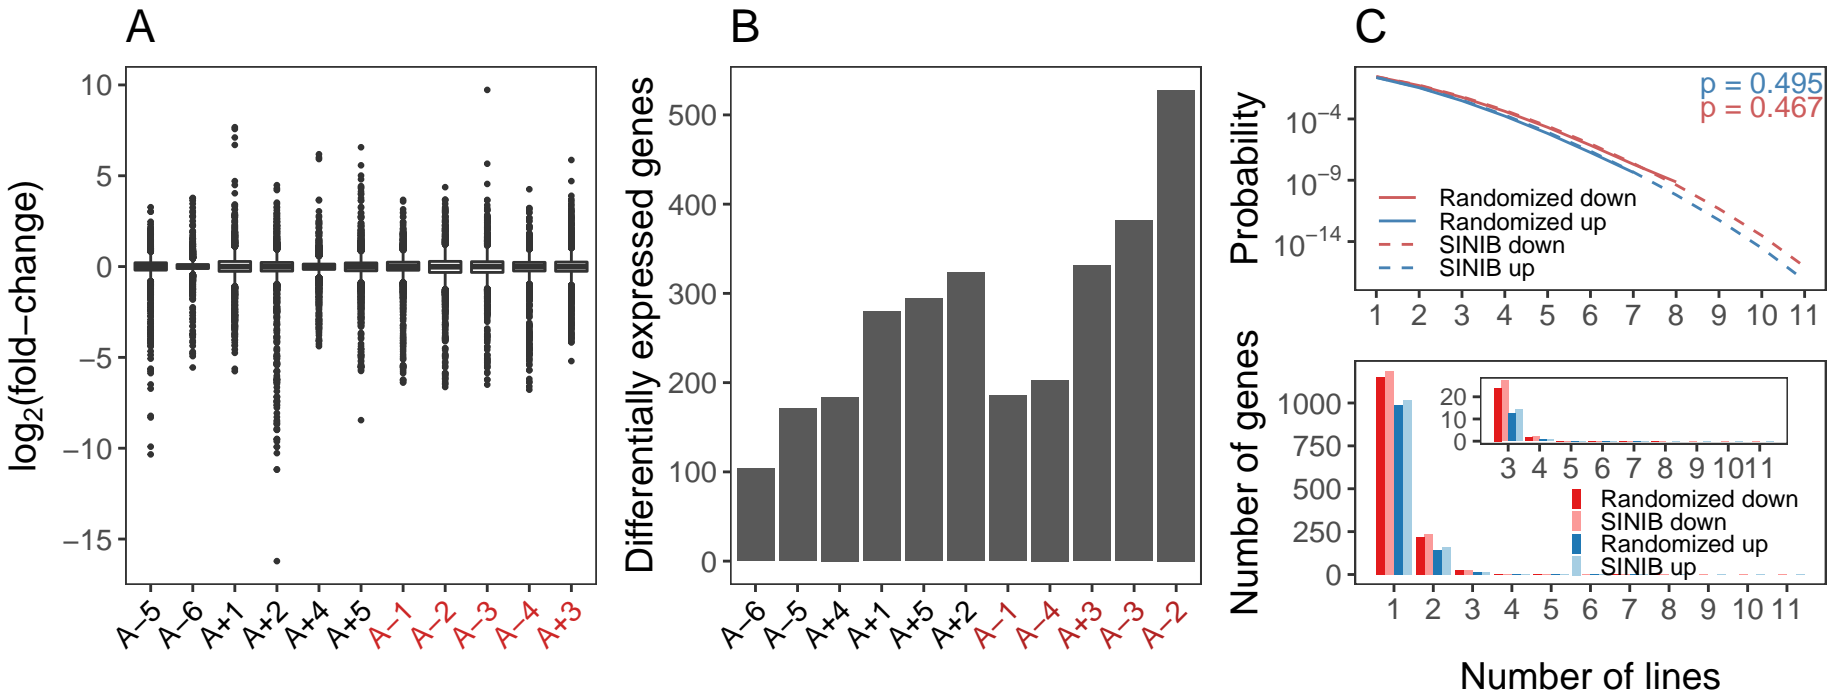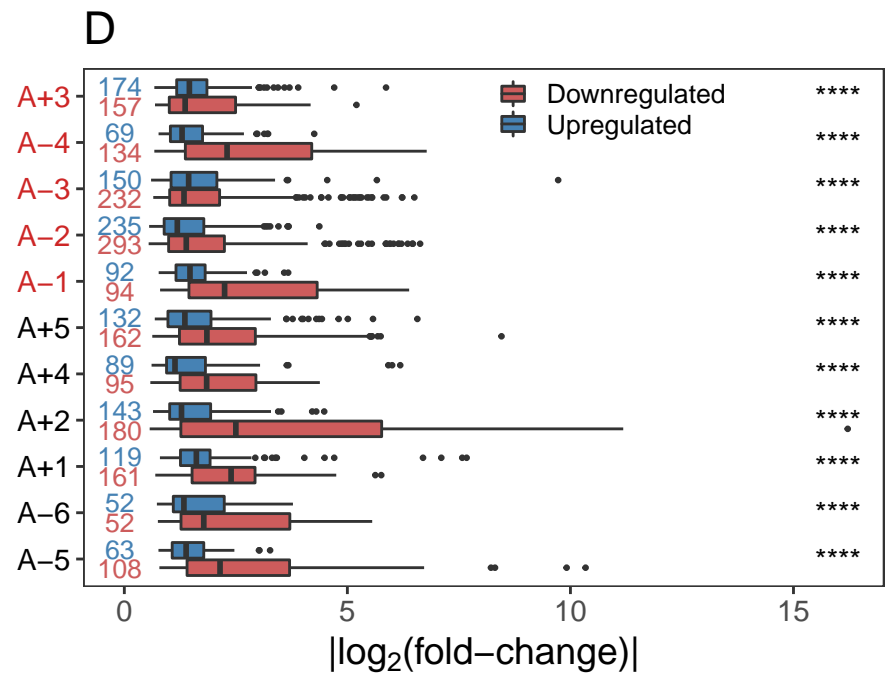

**F**

| PC1 genes | Product                                           |
|-----------|---------------------------------------------------|
| kgtP      | alpha-ketoglutarate:H <sup>+</sup> symporter      |
| elfC      | putative fimbrial usher protein ElfC              |
| tdcD      | propionate kinase                                 |
| sgbU      | predicted L-xylulose 5-phosphate 3-epimerase      |
| yqeH      | orf                                               |
| yjiG      | conserved inner membrane protein                  |
| ylaC      | predicted inner membrane protein                  |
| azoR      | FMN dependent NADH:quinone oxidoreductase         |
| hypT      | DNA-binding transcriptional dual regulator HypT   |
| hpaF      | 5-carboxymethyl-2-hydroxymuconate delta-isomerase |

| PC2 genes | Product                                                                 |
|-----------|-------------------------------------------------------------------------|
| mutL      | MutHLS complex, methyl-directed mismatch repair                         |
| yoaA      | putative 5' to 3' DNA helicase implicated in DNA repair                 |
| fumC      | fumarase C                                                              |
| nrfE      | putative cytochrome c-type biogenesis protein NrfE                      |
| cobU      | cobinamide-P guanylyltransferase / cobinamide kinase                    |
| maeA      | NAD <sup>+</sup> -dependent malate dehydrogenase                        |
| menD      | 2-succinyl-5-enolpyruvyl-6-hydroxy-3-cyclohexene-1-carboxylate synthase |
| gatD      | galactitol-1-phosphate 5-dehydrogenase                                  |
| gatA      | NA                                                                      |
| ydhC      | predicted transport protein YdhC                                        |
