# Supplementary material for: The landscape of transcriptional and translational changes over 22 years of bacterial adaptation
Source: eLife. 2022 Oct 10;11:e81979. doi: 10.7554/eLife.81979 (PMC9645810; doi:10.7554/eLife.81979)
Supplement: Supplementary file 8. — Generated from ‘codon_specific_densities.Rmd’ (https://github.com/shahlab/LTEE_gene_expression_2/tree/main/code/analysis). [file elife-81979-supp8.csv]

codon	line	replicate	amino_acid	avg_ribo_n	avg_ribo_n_w_0
AAA	Ara-1	rep1	K	1.0391671528550206	1.0837290845209646
AAA	Ara-1	rep2	K	0.9653170125278396	0.9379486502207789
AAA	Ara-2	rep1	K	1.0807516551333172	1.1548380148419632
AAA	Ara-2	rep2	K	1.0515751800131141	1.086401012436925
AAA	Ara-3	rep1	K	1.0256542263643298	1.080838947994945
AAA	Ara-3	rep2	K	1.0389710928879599	1.0402133807698288
AAA	Ara-4	rep1	K	1.1765447122030652	1.3396610482805593
AAA	Ara-4	rep2	K	1.0348659011243464	1.037394243531252
AAA	Ara-5	rep1	K	1.056794224115489	1.1080664250629513
AAA	Ara-5	rep2	K	0.9647149044452327	0.9459189129202631
AAA	Ara-6	rep1	K	1.1935534413269107	1.3088251544560354
AAA	Ara-6	rep2	K	1.076212986810689	1.084267403605304
AAA	Ara+1	rep1	K	1.1263269407311005	1.1863046456356467
AAA	Ara+1	rep2	K	1.021282328863986	1.0187279688607163
AAA	Ara+2	rep1	K	1.1032753232257337	1.2292086253305983
AAA	Ara+2	rep2	K	1.091684740762431	1.174425337553706
AAA	Ara+3	rep1	K	1.020647528707287	1.0370554991894239
AAA	Ara+3	rep2	K	1.0123480930618256	1.0100074609452496
AAA	Ara+4	rep1	K	1.0151733757786028	1.0549950572993925
AAA	Ara+4	rep2	K	0.9572081791076715	0.923340241421161
AAA	Ara+5	rep1	K	1.003748987308281	1.0355730407719501
AAA	Ara+5	rep2	K	1.0085243257238041	1.018899219780048
AAA	REL606	rep1	K	1.007884981713951	0.986645109941004
AAA	REL606	rep2	K	0.9739105647465562	0.9507358282157515
AAA	REL607	rep1	K	1.0135592954663708	1.0076955521452307
AAA	REL607	rep2	K	0.9980817686491024	0.9890826745940066
AAC	Ara-1	rep1	N	1.1204871947932749	1.2740039837297035
AAC	Ara-1	rep2	N	1.0848173822853633	1.169134505152165
AAC	Ara-2	rep1	N	1.1398205981132525	1.254988469311454
AAC	Ara-2	rep2	N	1.0753910751621472	1.1498889049497756
AAC	Ara-3	rep1	N	1.088287372204619	1.1812397156107541
AAC	Ara-3	rep2	N	1.1167956879160499	1.169029671679134
AAC	Ara-4	rep1	N	1.1420034524832894	1.2924599944067479
AAC	Ara-4	rep2	N	1.0987257485685273	1.1770202827365324
AAC	Ara-5	rep1	N	1.136288725065663	1.2959878710161405
AAC	Ara-5	rep2	N	1.1329422426588487	1.281950236978371
AAC	Ara-6	rep1	N	1.1761222542736014	1.277595043085917
AAC	Ara-6	rep2	N	1.1764118050335592	1.2860188783325681
AAC	Ara+1	rep1	N	1.195463713620749	1.3983256410813638
AAC	Ara+1	rep2	N	1.119986746086694	1.288265288605318
AAC	Ara+2	rep1	N	1.2324250547189441	1.4552087415509851
AAC	Ara+2	rep2	N	1.1924912499248248	1.3694469739992199
AAC	Ara+3	rep1	N	1.1279381241483653	1.2696850342727894
AAC	Ara+3	rep2	N	1.1126740523230645	1.248683904248382
AAC	Ara+4	rep1	N	1.0836283999107073	1.165855329666214
AAC	Ara+4	rep2	N	1.117726226804376	1.2164282257450398
AAC	Ara+5	rep1	N	1.2045900058658843	1.4209404211082028
AAC	Ara+5	rep2	N	1.201381340576264	1.395147653644669
AAC	REL606	rep1	N	1.166323090016457	1.3339667884512791
AAC	REL606	rep2	N	1.143398847991748	1.2269726131601428
AAC	REL607	rep1	N	1.1546211544181306	1.3500035713905763
AAC	REL607	rep2	N	1.1010571162688723	1.2450589697931718
AAG	Ara-1	rep1	K	1.1820716639244773	1.4785070641835554
AAG	Ara-1	rep2	K	1.0435213054430093	1.2434155631464405
AAG	Ara-2	rep1	K	1.4636399008898033	1.8713259410167038
AAG	Ara-2	rep2	K	1.3632769283451838	1.7422023252934595
AAG	Ara-3	rep1	K	1.4534295618937663	1.9539449943495872
AAG	Ara-3	rep2	K	1.7859766089042557	2.485634459101496
AAG	Ara-4	rep1	K	1.4811649498381987	1.8957732293355793
AAG	Ara-4	rep2	K	1.2885635784251999	1.5366263275124175
AAG	Ara-5	rep1	K	1.2807537536142015	1.6165579642507557
AAG	Ara-5	rep2	K	1.194180929900964	1.4266597471532003
AAG	Ara-6	rep1	K	1.4875333737081018	1.8670185422760508
AAG	Ara-6	rep2	K	1.4930383542472392	1.8072703202798122
AAG	Ara+1	rep1	K	1.244212185677308	1.5273363169302905
AAG	Ara+1	rep2	K	1.1296960938421872	1.3755979023242197
AAG	Ara+2	rep1	K	1.4014287529967675	1.750610663015911
AAG	Ara+2	rep2	K	1.4943413768895837	1.9615961346611555
AAG	Ara+3	rep1	K	1.22765812669973	1.4978253788060156
AAG	Ara+3	rep2	K	1.2146704797870673	1.533250528783185
AAG	Ara+4	rep1	K	1.1796954512896214	1.4163531138663281
AAG	Ara+4	rep2	K	1.1219489820492743	1.2895319171910902
AAG	Ara+5	rep1	K	1.1690107749068692	1.3689815735084216
AAG	Ara+5	rep2	K	1.2632385895648974	1.5250535849822116
AAG	REL606	rep1	K	1.1347397787868645	1.3774879819393921
AAG	REL606	rep2	K	1.1491966255786084	1.3173644979679187
AAG	REL607	rep1	K	1.0967534168054074	1.271415325583867
AAG	REL607	rep2	K	1.1368204075690391	1.3225136548430767
AAT	Ara-1	rep1	N	1.0244164438797576	0.964796165256408
AAT	Ara-1	rep2	N	0.9404353796640165	0.891269160069881
AAT	Ara-2	rep1	N	1.1197827646046012	1.1823281304971858
AAT	Ara-2	rep2	N	1.0632028203786537	1.0429320674199403
AAT	Ara-3	rep1	N	1.0741803040422742	1.024790982601561
AAT	Ara-3	rep2	N	1.018369583333418	1.0044361024012156
AAT	Ara-4	rep1	N	1.0481093910945851	1.065225436171589
AAT	Ara-4	rep2	N	0.9848315566522445	0.9201342580227149
AAT	Ara-5	rep1	N	1.0883935560297242	1.0441585060434055
AAT	Ara-5	rep2	N	0.980807151535311	0.9378001298847937
AAT	Ara-6	rep1	N	1.101428160031845	1.1622955270687527
AAT	Ara-6	rep2	N	0.9989419184056766	1.012419947623282
AAT	Ara+1	rep1	N	1.0812609119297243	1.145362982027241
AAT	Ara+1	rep2	N	1.016106295120106	1.0289136234812513
AAT	Ara+2	rep1	N	1.1020782359461676	1.2349356135878606
AAT	Ara+2	rep2	N	1.0692595092675266	1.130811516787241
AAT	Ara+3	rep1	N	1.0841017353345619	1.1020390337923514
AAT	Ara+3	rep2	N	0.992000507430375	0.9644325784912304
AAT	Ara+4	rep1	N	1.0044348751906658	0.9697566303156678
AAT	Ara+4	rep2	N	1.0431885734750668	1.0404853862624435
AAT	Ara+5	rep1	N	1.0435641172939112	1.101529214565697
AAT	Ara+5	rep2	N	1.0702541480836578	1.0691808424571156
AAT	REL606	rep1	N	1.0169817519120796	0.9816812957251072
AAT	REL606	rep2	N	0.9726677075396705	0.8982985309739971
AAT	REL607	rep1	N	1.0125993254451102	0.9590031687126841
AAT	REL607	rep2	N	0.9738348221520524	0.9239138857087992
ACA	Ara-1	rep1	T	1.0402304449196489	1.1777790179682726
ACA	Ara-1	rep2	T	1.12897371399016	1.3325335835043561
ACA	Ara-2	rep1	T	0.933708393734017	0.9226446061053196
ACA	Ara-2	rep2	T	1.0040992938192779	0.907837651107143
ACA	Ara-3	rep1	T	0.9879514054077422	0.8923796648266703
ACA	Ara-3	rep2	T	0.8547685128629829	0.7579437936975097
ACA	Ara-4	rep1	T	1.0729927127459307	1.1584348812398346
ACA	Ara-4	rep2	T	1.0555644632416878	1.0426336217875884
ACA	Ara-5	rep1	T	1.031296590713291	1.0027351629337522
ACA	Ara-5	rep2	T	0.9489971359950813	0.855973495977103
ACA	Ara-6	rep1	T	1.0361806822152988	1.1363364538374374
ACA	Ara-6	rep2	T	1.1487934679149647	1.217403697299761
ACA	Ara+1	rep1	T	0.8710615992482392	0.8829501834650939
ACA	Ara+1	rep2	T	0.9559997462137008	0.9875552171797047
ACA	Ara+2	rep1	T	0.9771608933923468	0.9502749415207766
ACA	Ara+2	rep2	T	0.9844886835360391	0.9397176734232635
ACA	Ara+3	rep1	T	1.0029915009664314	0.9863172790915958
ACA	Ara+3	rep2	T	0.9921707181288877	0.9272829880215968
ACA	Ara+4	rep1	T	0.9827089591662508	0.9643294366619972
ACA	Ara+4	rep2	T	0.9152132484038045	0.841792009032966
ACA	Ara+5	rep1	T	0.9889750879276461	0.9276174983320674
ACA	Ara+5	rep2	T	0.9625627642176192	0.9192882968476287
ACA	REL606	rep1	T	0.9912551962222027	0.9597319929190398
ACA	REL606	rep2	T	0.9356922964234377	0.83221772220256085
ACA	REL607	rep1	T	0.9106632304272295	0.8639023128993703
ACA	REL607	rep2	T	0.9311470015725406	0.9233791534522563
ACC	Ara-1	rep1	T	0.9809068405840898	0.8484219532128696
ACC	Ara-1	rep2	T	1.0521475850036688	0.957631702724153
ACC	Ara-2	rep1	T	0.8127015230213714	0.6726965482757884
ACC	Ara-2	rep2	T	0.8918174257312914	0.7493582210434973
ACC	Ara-3	rep1	T	0.8273594234066425	0.6615437373878045
ACC	Ara-3	rep2	T	0.7936749274373149	0.655067257271798
ACC	Ara-4	rep1	T	1.0831122801563957	1.0351462410823387
ACC	Ara-4	rep2	T	1.0466258177329326	0.9412611975514587
ACC	Ara-5	rep1	T	0.9121473203386358	0.7614036456575763
ACC	Ara-5	rep2	T	0.8851369693149191	0.764458528335679
ACC	Ara-6	rep1	T	0.8822624599106385	0.7725555984289925
ACC	Ara-6	rep2	T	1.00880163948342	0.945533460723432
ACC	Ara+1	rep1	T	0.8903947708235207	0.7254520071341984
ACC	Ara+1	rep2	T	0.8869972087118879	0.7162419329565358
ACC	Ara+2	rep1	T	0.8629299594277122	0.7394638856462658
ACC	Ara+2	rep2	T	0.8599796219173607	0.697666096344368
ACC	Ara+3	rep1	T	0.9249476588729427	0.7875030319005119
ACC	Ara+3	rep2	T	0.9218687700154331	0.7497221020528336
ACC	Ara+4	rep1	T	0.9499963770617547	0.8128710211514187
ACC	Ara+4	rep2	T	0.9312552045311074	0.8017045193306915
ACC	Ara+5	rep1	T	0.8635305874197426	0.7219693394787473
ACC	Ara+5	rep2	T	0.8441619930378319	0.6866020806964714
ACC	REL606	rep1	T	0.957506621873795	0.8238418075445526
ACC	REL606	rep2	T	0.9355565359654435	0.8261888905987395
ACC	REL607	rep1	T	0.9289439098545853	0.7874134111815032
ACC	REL607	rep2	T	0.9240696723043664	0.7700794545569604
ACG	Ara-1	rep1	T	1.0204539144576172	1.12807589675199
ACG	Ara-1	rep2	T	1.157498536439702	1.293521358413046
ACG	Ara-2	rep1	T	0.9560310913993844	0.9218994691479565
ACG	Ara-2	rep2	T	1.0195318687257782	1.0511678796047181
ACG	Ara-3	rep1	T	0.9180064376208836	0.8827914223130073
ACG	Ara-3	rep2	T	0.9465582503756631	0.9478935052136658
ACG	Ara-4	rep1	T	1.0972972343497553	1.1751380687841144
ACG	Ara-4	rep2	T	1.1256916273295654	1.2546024546277066
ACG	Ara-5	rep1	T	0.9895810088764008	1.0300123947622162
ACG	Ara-5	rep2	T	1.0134647840914646	1.0730715099811983
ACG	Ara-6	rep1	T	0.9907050759574006	1.03366768278242
ACG	Ara-6	rep2	T	1.2132741966317864	1.3442845236080856
ACG	Ara+1	rep1	T	0.968012309269307	0.9772659805165098
ACG	Ara+1	rep2	T	0.9702648655027625	1.0108981484679986
ACG	Ara+2	rep1	T	0.9278531249037915	0.9074313227996376
ACG	Ara+2	rep2	T	0.9906851469775195	1.0224985941930582
ACG	Ara+3	rep1	T	0.9740118810505154	1.0326275008618557
ACG	Ara+3	rep2	T	1.0366198239593416	1.1329095853415276
ACG	Ara+4	rep1	T	0.9888525056335062	0.9920083603364107
ACG	Ara+4	rep2	T	0.9865337176134931	1.0276129644060237
ACG	Ara+5	rep1	T	0.9597861377847792	0.9914178775820276
ACG	Ara+5	rep2	T	1.0188146593758693	1.0274927608701505
ACG	REL606	rep1	T	0.9757770226478512	1.0133087405582288
ACG	REL606	rep2	T	1.0290005339941461	1.0962287969833178
ACG	REL607	rep1	T	0.9626006720934835	1.0122113933502102
ACG	REL607	rep2	T	1.003792147448093	1.0572524128033132
ACT	Ara-1	rep1	T	1.2177482658621144	1.3953486077624195
ACT	Ara-1	rep2	T	1.3082112836344222	1.4496513549625447
ACT	Ara-2	rep1	T	1.019244994664601	1.0469994564983667
ACT	Ara-2	rep2	T	0.9997356309242333	0.9896349015587202
ACT	Ara-3	rep1	T	0.9660329355130378	1.023558597805249
ACT	Ara-3	rep2	T	0.9363971543406984	0.8973373357045891
ACT	Ara-4	rep1	T	1.0937288605643538	1.2002841459105753
ACT	Ara-4	rep2	T	0.9970238821277507	0.9617675897310013
ACT	Ara-5	rep1	T	1.1851983008980749	1.2881633687979754
ACT	Ara-5	rep2	T	1.1008176411385204	1.0887843606618555
ACT	Ara-6	rep1	T	1.0699924674405747	1.0848267853271278
ACT	Ara-6	rep2	T	1.1567076125003888	1.1515301585563222
ACT	Ara+1	rep1	T	1.1365601975141357	1.19229740555963
ACT	Ara+1	rep2	T	1.1587418225247603	1.23263751253134
ACT	Ara+2	rep1	T	1.0034382105418753	0.9599559752451112
ACT	Ara+2	rep2	T	0.9898745026135297	0.9583841458990715
ACT	Ara+3	rep1	T	1.0491203485074028	1.07213588887618
ACT	Ara+3	rep2	T	1.031567036010127	0.9791665484511541
ACT	Ara+4	rep1	T	1.0242625968507069	0.9930393061549986
ACT	Ara+4	rep2	T	1.0061541274991561	0.9903273514390633
ACT	Ara+5	rep1	T	1.1001708545606876	1.1334416994520693
ACT	Ara+5	rep2	T	1.0615152083431645	1.0641721513849371
ACT	REL606	rep1	T	1.1847373214352086	1.2317647287302522
ACT	REL606	rep2	T	1.1514705596163664	1.19143643102551
ACT	REL607	rep1	T	1.1376552563496984	1.177067387729399
ACT	REL607	rep2	T	1.1164050882757564	1.1504158320296902
AGA	Ara-1	rep1	R	1.2333223122280554	2.026860626768215
AGA	Ara-1	rep2	R	1.5517673852778795	2.3171877513521943
AGA	Ara-2	rep1	R	1.4834373098378464	1.9408702885245261
AGA	Ara-2	rep2	R	1.39595266530326	1.8197356500782598
AGA	Ara-3	rep1	R	1.1509104687144098	1.764276930746104
AGA	Ara-3	rep2	R	1.1705189535775158	1.6078758820856862
AGA	Ara-4	rep1	R	1.3840276542778345	1.8776280134791739
AGA	Ara-4	rep2	R	1.3128231991408543	1.6888714757337826
AGA	Ara-5	rep1	R	1.3273165053727967	2.0415579079920665
AGA	Ara-5	rep2	R	1.3238182145418713	1.6357416156694125
AGA	Ara-6	rep1	R	1.488366521504136	2.130728913078335
AGA	Ara-6	rep2	R	1.3245820570714517	1.8615262697257113
AGA	Ara+1	rep1	R	1.2346278502348513	1.4347288418828856
AGA	Ara+1	rep2	R	1.1524830933401433	1.6390326505490438
AGA	Ara+2	rep1	R	1.5816420668924156	2.36266520340196
AGA	Ara+2	rep2	R	1.4096346099449117	1.9307719021649152
AGA	Ara+3	rep1	R	1.410803437554192	1.902338566211607
AGA	Ara+3	rep2	R	1.3755407823245949	1.8453734212757822
AGA	Ara+4	rep1	R	1.3746059580189929	1.9318565505630263
AGA	Ara+4	rep2	R	1.1544628332558158	1.617715758120663
AGA	Ara+5	rep1	R	1.5494299084293413	2.318643633801955
AGA	Ara+5	rep2	R	1.394380593131782	1.8832925643018117
AGA	REL606	rep1	R	1.3358355108127684	1.9553641673465194
AGA	REL606	rep2	R	1.2512962869553739	1.6731805298315423
AGA	REL607	rep1	R	1.140416846954938	1.651917910059966
AGA	REL607	rep2	R	1.2220255056564173	1.803597393199069
AGC	Ara-1	rep1	S	0.9076761321951923	0.7909388214740668
AGC	Ara-1	rep2	S	0.8851570953014251	0.7557285313084716
AGC	Ara-2	rep1	S	0.8935247797303607	0.7189996336139827
AGC	Ara-2	rep2	S	0.9269969181652	0.7775234901890079
AGC	Ara-3	rep1	S	0.9022857434714657	0.7136899946051315
AGC	Ara-3	rep2	S	0.8623773272980988	0.728307756402579
AGC	Ara-4	rep1	S	0.9153287556794988	0.8279322351449968
AGC	Ara-4	rep2	S	0.958559027795513	0.887539570610999
AGC	Ara-5	rep1	S	0.8990905841514152	0.8531575565709216
AGC	Ara-5	rep2	S	0.9030380891570856	0.7950982664959625
AGC	Ara-6	rep1	S	0.9231724895674744	0.8363029924948918
AGC	Ara-6	rep2	S	0.9132179536550795	0.8458410657230289
AGC	Ara+1	rep1	S	0.8590783384128536	0.7383499329320449
AGC	Ara+1	rep2	S	0.8772155714280063	0.7614333926335946
AGC	Ara+2	rep1	S	0.8925295603302249	0.7779178054669456
AGC	Ara+2	rep2	S	0.9003012840417783	0.7970195848894163
AGC	Ara+3	rep1	S	0.908437206955968	0.8907203708080238
AGC	Ara+3	rep2	S	0.9270617468687032	0.8246453617899077
AGC	Ara+4	rep1	S	1.0091170382153047	0.9577543237560376
AGC	Ara+4	rep2	S	0.9657766349223653	0.8635176098765217
AGC	Ara+5	rep1	S	0.8860551269949227	0.8205219708516434
AGC	Ara+5	rep2	S	0.9129595002429709	0.8145485788419794
AGC	REL606	rep1	S	0.8804651179817933	0.7867186715623723
AGC	REL606	rep2	S	0.8751835351052409	0.8009996259762266
AGC	REL607	rep1	S	0.881715515050346	0.8271136157928123
AGC	REL607	rep2	S	0.9418795612498029	0.875893985292886
AGG	Ara-1	rep1	R	0.7708866496554996	0.9398283758781373
AGG	Ara-1	rep2	R	0.9053932200411139	1.0281907972375965
AGG	Ara-2	rep1	R	0.9382730850815906	1.1334916977043412
AGG	Ara-2	rep2	R	1.058464435793465	1.2023769212138595
AGG	Ara-3	rep1	R	1.1698955445576602	1.459643193405031
AGG	Ara-3	rep2	R	1.0490092142005512	1.6949220043775794
AGG	Ara-4	rep1	R	0.909662633365393	1.417814154565961
AGG	Ara-4	rep2	R	1.0219114983674193	1.2652246367153501
AGG	Ara-5	rep1	R	0.7030225728780035	0.8911855494018949
AGG	Ara-5	rep2	R	0.9855812390014256	1.1106083563903868
AGG	Ara-6	rep1	R	0.9650802769160819	1.1646818798114351
AGG	Ara-6	rep2	R	1.1019907619621239	1.2696813065981185
AGG	Ara+1	rep1	R	0.7995180414398293	1.1070493443367697
AGG	Ara+1	rep2	R	0.9982063085561427	1.4031439676378692
AGG	Ara+2	rep1	R	0.8476634404682674	1.2153064957340172
AGG	Ara+2	rep2	R	1.0725239863729021	1.5675322737039923
AGG	Ara+3	rep1	R	0.7608176006903801	1.0488784281170862
AGG	Ara+3	rep2	R	0.9244793852956158	1.3040727040366809
AGG	Ara+4	rep1	R	0.7787734760636604	1.1577139791049609
AGG	Ara+4	rep2	R	0.8404006654619516	1.025525011600172
AGG	Ara+5	rep1	R	0.9975113286672931	1.1885651392266776
AGG	Ara+5	rep2	R	1.1092370824019648	1.4741028569187036
AGG	REL606	rep1	R	1.0570826408896699	1.2101800965796077
AGG	REL606	rep2	R	0.9770613706616238	1.6157308711734948
AGG	REL607	rep1	R	0.9361900487265008	1.2431578759546
AGG	REL607	rep2	R	1.0659081199067364	1.7126595964228997
AGT	Ara-1	rep1	S	1.1465693327138744	1.092600636520923
AGT	Ara-1	rep2	S	1.010802003334011	1.0129098551328204
AGT	Ara-2	rep1	S	1.0518414849775246	0.9923519034902747
AGT	Ara-2	rep2	S	1.0009918783691791	0.948779632571645
AGT	Ara-3	rep1	S	1.0848287395423892	1.080268033038562
AGT	Ara-3	rep2	S	0.9454629850050836	0.8518012526113689
AGT	Ara-4	rep1	S	1.0695016517545866	0.9773459111276362
AGT	Ara-4	rep2	S	1.0221153851449112	0.972007769271617
AGT	Ara-5	rep1	S	1.0821202512392518	1.0461958518276873
AGT	Ara-5	rep2	S	0.9653859520233479	0.8972814823851274
AGT	Ara-6	rep1	S	1.0623521688071749	0.9686850772038774
AGT	Ara-6	rep2	S	0.9978825602397049	0.9589374850842418
AGT	Ara+1	rep1	S	0.9521984607366505	0.9547267246650347
AGT	Ara+1	rep2	S	0.9768706139409432	0.8486514920254954
AGT	Ara+2	rep1	S	1.008532412717408	0.9797877065154023
AGT	Ara+2	rep2	S	1.0347754159340985	1.021743284755233
AGT	Ara+3	rep1	S	1.1042918149299663	1.0866587231889266
AGT	Ara+3	rep2	S	1.0086690145861275	1.0202922363086728
AGT	Ara+4	rep1	S	1.0443617436742783	1.0709565875666296
AGT	Ara+4	rep2	S	1.0013804969425522	1.0250896699096212
AGT	Ara+5	rep1	S	1.0087782267395689	0.9805013128148817
AGT	Ara+5	rep2	S	1.0064413738532323	0.9523961609738122
AGT	REL606	rep1	S	1.1515697754045546	1.0252927376293768
AGT	REL606	rep2	S	0.967757341324112	0.8894560947846554
AGT	REL607	rep1	S	1.10467750879838	1.0399174228284878
AGT	REL607	rep2	S	0.9896360275254623	0.9925446676043946
ATA	Ara-1	rep1	I	1.2676653940486073	1.5939457781311004
ATA	Ara-1	rep2	I	1.3599327800805303	1.3958576038775266
ATA	Ara-2	rep1	I	1.4948236698241364	2.030276051115781
ATA	Ara-2	rep2	I	1.5119911348205872	1.5333554158287201
ATA	Ara-3	rep1	I	1.3131781900528852	2.5553691378322743
ATA	Ara-3	rep2	I	1.4004079277544044	1.4990859404503183
ATA	Ara-4	rep1	I	1.2247885693894256	1.4007948000606165
ATA	Ara-4	rep2	I	1.2222069302072947	1.26081015006977
ATA	Ara-5	rep1	I	1.175447922439246	1.3214052580977793
ATA	Ara-5	rep2	I	1.322334980183187	1.4214805539265116
ATA	Ara-6	rep1	I	1.3249105077203567	1.6888576749226831
ATA	Ara-6	rep2	I	1.3746949722106443	1.4906472504953916
ATA	Ara+1	rep1	I	1.3657254447741325	1.7211789652286706
ATA	Ara+1	rep2	I	1.5210385031665399	1.6887267304721914
ATA	Ara+2	rep1	I	1.3429677767275738	1.6716733542439741
ATA	Ara+2	rep2	I	1.307122107918491	1.617497528280837
ATA	Ara+3	rep1	I	1.3384139768419747	2.086712726389707
ATA	Ara+3	rep2	I	1.3300106736496493	1.5229235675787536
ATA	Ara+4	rep1	I	1.1784253804943001	1.6579773900262913
ATA	Ara+4	rep2	I	1.2858258412846695	1.4734650936322375
ATA	Ara+5	rep1	I	1.3409990518551391	1.590027135069267
ATA	Ara+5	rep2	I	1.3618978885571829	1.7104822986756567
ATA	REL606	rep1	I	1.2512023560850691	1.3343949260926016
ATA	REL606	rep2	I	1.220697459493226	1.268317578725595
ATA	REL607	rep1	I	1.2313950135384562	1.487300380612995
ATA	REL607	rep2	I	1.3177115996246842	1.5068278363701955
ATC	Ara-1	rep1	I	0.9539604218168294	0.8970494848614382
ATC	Ara-1	rep2	I	0.9046551100670108	0.8547066716418174
ATC	Ara-2	rep1	I	0.9631836743932991	0.9532538241188714
ATC	Ara-2	rep2	I	0.9486034685483684	0.9112577203755207
ATC	Ara-3	rep1	I	0.954321396820498	0.9509499088525064
ATC	Ara-3	rep2	I	1.008850769031308	1.0026992009542524
ATC	Ara-4	rep1	I	0.9970877188734002	0.9875568233710569
ATC	Ara-4	rep2	I	1.0311171637515415	1.0269576756146577
ATC	Ara-5	rep1	I	0.9500545415480034	0.9349344786464887
ATC	Ara-5	rep2	I	0.9486826725937584	0.9204424768957163
ATC	Ara-6	rep1	I	0.9713318620815219	0.9517761787138033
ATC	Ara-6	rep2	I	0.9877126741412683	0.9592571129149852
ATC	Ara+1	rep1	I	0.933322627650804	0.9133261133353799
ATC	Ara+1	rep2	I	0.9556843608693191	0.9039065513357752
ATC	Ara+2	rep1	I	1.0001780106818907	0.994243126109942
ATC	Ara+2	rep2	I	0.9932693997340112	0.9757217675606509
ATC	Ara+3	rep1	I	0.9538056696384253	0.9611032971709497
ATC	Ara+3	rep2	I	1.0236018725653246	1.0037168640035552
ATC	Ara+4	rep1	I	1.0020601161270506	0.9728045928903396
ATC	Ara+4	rep2	I	1.0357930897692436	1.0129392410399887
ATC	Ara+5	rep1	I	0.9699682587749798	0.9702772205291225
ATC	Ara+5	rep2	I	0.9861441016900241	0.9564241299033911
ATC	REL606	rep1	I	0.9404287814094567	0.9061607201268584
ATC	REL606	rep2	I	0.9610317893121939	0.9312042534079672
ATC	REL607	rep1	I	0.9675975088645029	0.9366187690230172
ATC	REL607	rep2	I	0.9830779239347702	0.9679319723478665
ATG	Ara-1	rep1	M	1.007653331633096	1.0352561547058532
ATG	Ara-1	rep2	M	1.00520581506024	1.0035390430073898
ATG	Ara-2	rep1	M	1.2455478660581092	1.313874610672092
ATG	Ara-2	rep2	M	1.2280781198877142	1.2761642913767581
ATG	Ara-3	rep1	M	1.2250478692963838	1.349486104274715
ATG	Ara-3	rep2	M	1.1992563229461215	1.2840663620252013
ATG	Ara-4	rep1	M	1.0877571457525324	1.1372703535914046
ATG	Ara-4	rep2	M	1.0410306664565387	1.101080983268167
ATG	Ara-5	rep1	M	1.0705715056438092	1.0894267580983765
ATG	Ara-5	rep2	M	1.0620074850539267	1.1203058233443872
ATG	Ara-6	rep1	M	1.2131482558630744	1.2916306789924836
ATG	Ara-6	rep2	M	1.162452368934209	1.2362604577159597
ATG	Ara+1	rep1	M	1.0804352197121256	1.1410141286254945
ATG	Ara+1	rep2	M	1.0539038671024856	1.050707386235065
ATG	Ara+2	rep1	M	1.1181961010848238	1.2187414661669316
ATG	Ara+2	rep2	M	1.1994539280949459	1.28806566747314
ATG	Ara+3	rep1	M	1.0289673427095962	1.1263907219724743
ATG	Ara+3	rep2	M	1.0748023334260277	1.1571621664066096
ATG	Ara+4	rep1	M	1.0302330672212832	1.0983899666850765
ATG	Ara+4	rep2	M	1.0088391096515916	1.05848039256824
ATG	Ara+5	rep1	M	1.0492884704191303	1.1237633281878547
ATG	Ara+5	rep2	M	1.1170616318074136	1.204652380803739
ATG	REL606	rep1	M	1.0840892340512653	1.136527632605412
ATG	REL606	rep2	M	1.0600983494467888	1.0829571671397331
ATG	REL607	rep1	M	1.0472049337930511	1.1357946198102042
ATG	REL607	rep2	M	1.0559303057582519	1.113501074494462
ATT	Ara-1	rep1	I	0.9980582596691484	0.9455197635627063
ATT	Ara-1	rep2	I	0.9635576501000208	0.8400816460356475
ATT	Ara-2	rep1	I	1.0175979878799124	0.9619224460548512
ATT	Ara-2	rep2	I	0.9931400932785565	0.8866113953088062
ATT	Ara-3	rep1	I	1.008328169403858	0.9258310896784394
ATT	Ara-3	rep2	I	0.9837302949090238	0.9090446381609649
ATT	Ara-4	rep1	I	0.9765043721903574	0.941139995872922
ATT	Ara-4	rep2	I	0.9512589161336569	0.8740548609395714
ATT	Ara-5	rep1	I	0.9633315021597858	0.8732355322193772
ATT	Ara-5	rep2	I	0.9510245622579386	0.8518768111178865
ATT	Ara-6	rep1	I	0.98336199747701	0.9149473973819544
ATT	Ara-6	rep2	I	0.9293686663820321	0.8294122480554558
ATT	Ara+1	rep1	I	1.0194847098842486	0.9791189557320126
ATT	Ara+1	rep2	I	1.020879211642306	0.9581543463214669
ATT	Ara+2	rep1	I	1.014723390894395	0.9913553835597793
ATT	Ara+2	rep2	I	0.9909902131434041	0.9593836739162451
ATT	Ara+3	rep1	I	0.9704731267754728	0.8893458969939915
ATT	Ara+3	rep2	I	0.9753092225529959	0.9012360798132337
ATT	Ara+4	rep1	I	0.9971063669477109	0.9240863339666261
ATT	Ara+4	rep2	I	1.000484309112776	0.9449549773925473
ATT	Ara+5	rep1	I	0.9985344114105141	0.9233260171835341
ATT	Ara+5	rep2	I	0.9844425564733752	0.9261528488464729
ATT	REL606	rep1	I	0.9717522011026437	0.8569720837880425
ATT	REL606	rep2	I	0.98121454766894	0.872610373564829
ATT	REL607	rep1	I	1.011427633601148	0.9205877335130818
ATT	REL607	rep2	I	0.9976043396943222	0.8887566958799585
CAA	Ara-1	rep1	Q	0.8171013832571831	0.6906922124440631
CAA	Ara-1	rep2	Q	0.8317185366809756	0.6280319157665006
CAA	Ara-2	rep1	Q	0.8828112024295668	0.7450533450817705
CAA	Ara-2	rep2	Q	0.8469600525657216	0.6948158159134536
CAA	Ara-3	rep1	Q	0.9516238933417944	0.7756086311203644
CAA	Ara-3	rep2	Q	0.9003986622931918	0.7414183486756643
CAA	Ara-4	rep1	Q	0.795394629713821	0.7025203918181425
CAA	Ara-4	rep2	Q	0.7803802242990846	0.6214373866345778
CAA	Ara-5	rep1	Q	0.8489021428501734	0.6975789472439478
CAA	Ara-5	rep2	Q	0.7925665963433186	0.6198974820223605
CAA	Ara-6	rep1	Q	0.8462303819269618	0.7061502313738618
CAA	Ara-6	rep2	Q	0.8181793879424354	0.680345801013349
CAA	Ara+1	rep1	Q	0.7831367052818291	0.7043638024114369
CAA	Ara+1	rep2	Q	0.8191988794881108	0.6800044263996016
CAA	Ara+2	rep1	Q	0.8365103918536863	0.6803655844748215
CAA	Ara+2	rep2	Q	0.8124500194962395	0.6699427988743458
CAA	Ara+3	rep1	Q	0.8215935721345637	0.650150960891931
CAA	Ara+3	rep2	Q	0.7952714214933574	0.6375246376707931
CAA	Ara+4	rep1	Q	0.8414289928865963	0.6300040013931045
CAA	Ara+4	rep2	Q	0.8788717106356104	0.6586591819560713
CAA	Ara+5	rep1	Q	0.8205309509468021	0.6472871270608831
CAA	Ara+5	rep2	Q	0.8178168745705028	0.6788607554038871
CAA	REL606	rep1	Q	0.8455787091153103	0.6744211761630966
CAA	REL606	rep2	Q	0.8550680149936551	0.6597567255278219
CAA	REL607	rep1	Q	0.8572981024873683	0.6968411069862392
CAA	REL607	rep2	Q	0.8089737086670906	0.6020036443047773
CAC	Ara-1	rep1	H	0.7126151038799662	0.5194576296075041
CAC	Ara-1	rep2	H	0.817512350742809	0.5547166884241836
CAC	Ara-2	rep1	H	0.7671335208348314	0.5673161260227575
CAC	Ara-2	rep2	H	0.7543923289709336	0.5883151440635966
CAC	Ara-3	rep1	H	0.7514945871741991	0.5785790034976744
CAC	Ara-3	rep2	H	0.7521868662268963	0.6098534245426234
CAC	Ara-4	rep1	H	0.7897256617773973	0.570693029928855
CAC	Ara-4	rep2	H	0.801526483360321	0.6660015938593637
CAC	Ara-5	rep1	H	0.8170055907178663	0.640098116701787
CAC	Ara-5	rep2	H	0.9248104344409709	0.8183886177142676
CAC	Ara-6	rep1	H	0.72912452828328	0.5565638122215161
CAC	Ara-6	rep2	H	0.7586296631484691	0.6237301185001508
CAC	Ara+1	rep1	H	0.714744880112488	0.5014143009904127
CAC	Ara+1	rep2	H	0.7751163956612496	0.5620421005297942
CAC	Ara+2	rep1	H	0.7347934593936805	0.5582466588799756
CAC	Ara+2	rep2	H	0.7377268727166497	0.5687529282559332
CAC	Ara+3	rep1	H	0.7319953616766749	0.4980430997574
CAC	Ara+3	rep2	H	0.7611065202718832	0.6190312538156039
CAC	Ara+4	rep1	H	0.8024801491900173	0.6776529177323695
CAC	Ara+4	rep2	H	0.8375669349097968	0.7576406126320278
CAC	Ara+5	rep1	H	0.7295695730712055	0.557523355261487
CAC	Ara+5	rep2	H	0.7324615939061733	0.5899166835267937
CAC	REL606	rep1	H	0.7422380724166706	0.5507987098867557
CAC	REL606	rep2	H	0.9243147074184438	0.8110197619295133
CAC	REL607	rep1	H	0.722590070611506	0.5520208880328001
CAC	REL607	rep2	H	0.7634872353430545	0.6034792243658557
CAG	Ara-1	rep1	Q	0.8257021949654169	0.6977190081181306
CAG	Ara-1	rep2	Q	0.8632485567213403	0.7436705699985012
CAG	Ara-2	rep1	Q	0.8281032516972611	0.7193281370125307
CAG	Ara-2	rep2	Q	0.8474911791868296	0.7388648558329023
CAG	Ara-3	rep1	Q	0.893345870094743	0.7966794981937052
CAG	Ara-3	rep2	Q	0.9135934711991418	0.8494235011698013
CAG	Ara-4	rep1	Q	0.8425755248510728	0.7533961767459807
CAG	Ara-4	rep2	Q	0.8404592607653608	0.7646322511726118
CAG	Ara-5	rep1	Q	0.8617478050716595	0.734964235474557
CAG	Ara-5	rep2	Q	0.8499508397500493	0.7298353575181793
CAG	Ara-6	rep1	Q	0.8307985062636848	0.7695592136916356
CAG	Ara-6	rep2	Q	0.8523546787435554	0.7889064956149833
CAG	Ara+1	rep1	Q	0.88458238179689	0.7750172468790276
CAG	Ara+1	rep2	Q	0.9341854363902243	0.8301304879519766
CAG	Ara+2	rep1	Q	0.8097464348376066	0.6861762350754649
CAG	Ara+2	rep2	Q	0.8315860555468698	0.7162738473827235
CAG	Ara+3	rep1	Q	0.8362916645788087	0.7113116404794902
CAG	Ara+3	rep2	Q	0.8367457554799166	0.7158309957426995
CAG	Ara+4	rep1	Q	0.8512875188357168	0.7507887505438043
CAG	Ara+4	rep2	Q	0.9143951791709221	0.8263979693702949
CAG	Ara+5	rep1	Q	0.8352637192676154	0.6998040997977372
CAG	Ara+5	rep2	Q	0.8445074868796792	0.7631323998102872
CAG	REL606	rep1	Q	0.8176615964617698	0.7055552345724523
CAG	REL606	rep2	Q	0.8788535599660058	0.7939406922696891
CAG	REL607	rep1	Q	0.8541923745690497	0.7743193493363042
CAG	REL607	rep2	Q	0.8358939303464161	0.7197242610695186
CAT	Ara-1	rep1	H	0.842899038766369	0.5650308586197038
CAT	Ara-1	rep2	H	0.8661839327150125	0.5684793943047647
CAT	Ara-2	rep1	H	0.8323994990825822	0.6292033110987799
CAT	Ara-2	rep2	H	0.8352962448307546	0.604579557002955
CAT	Ara-3	rep1	H	0.8533526519218978	0.5818137463549412
CAT	Ara-3	rep2	H	0.8013060946873546	0.628327648815979
CAT	Ara-4	rep1	H	0.7957861080515835	0.5957052524800519
CAT	Ara-4	rep2	H	0.7657307839470237	0.564635859437519
CAT	Ara-5	rep1	H	0.8802911276944346	0.6505597014431617
CAT	Ara-5	rep2	H	0.9395378503280262	0.7024093685933801
CAT	Ara-6	rep1	H	0.7961297290611503	0.5822025620260998
CAT	Ara-6	rep2	H	0.7846246261103647	0.6015760419798908
CAT	Ara+1	rep1	H	0.8211211735033834	0.5771065741558338
CAT	Ara+1	rep2	H	0.8502070177690714	0.620781464704512
CAT	Ara+2	rep1	H	0.7667960089497393	0.5679116966418609
CAT	Ara+2	rep2	H	0.7955038429372023	0.5611157887085966
CAT	Ara+3	rep1	H	0.834633707143349	0.5916768127306077
CAT	Ara+3	rep2	H	0.8076275357831768	0.5822584188831449
CAT	Ara+4	rep1	H	0.8200142750134259	0.627310529736412
CAT	Ara+4	rep2	H	0.858620034212349	0.6892242570378152
CAT	Ara+5	rep1	H	0.8542284649069009	0.6129694110104487
CAT	Ara+5	rep2	H	0.8252996211525473	0.5815452415682203
CAT	REL606	rep1	H	0.8483361247707982	0.5353748012684482
CAT	REL606	rep2	H	0.8704595815306152	0.7292412400114501
CAT	REL607	rep1	H	0.8208352211681447	0.5666938554487304
CAT	REL607	rep2	H	0.830307211877521	0.5624516442935981
CCA	Ara-1	rep1	P	0.9230378284082263	0.8109338361735743
CCA	Ara-1	rep2	P	0.9896223326816771	0.7454534310865976
CCA	Ara-2	rep1	P	1.0037519622097466	0.8862621658551005
CCA	Ara-2	rep2	P	1.1098604912831842	1.0027146735989554
CCA	Ara-3	rep1	P	1.1257283680679606	1.0515361449488279
CCA	Ara-3	rep2	P	1.0568689853108275	0.8578313535640592
CCA	Ara-4	rep1	P	1.1166962368733948	0.96328855110335
CCA	Ara-4	rep2	P	1.0224399627712806	0.8453559539307359
CCA	Ara-5	rep1	P	0.9953670678055327	0.7985479758026119
CCA	Ara-5	rep2	P	1.001620344224321	0.8550695502229703
CCA	Ara-6	rep1	P	1.0614554054702836	1.011189279662827
CCA	Ara-6	rep2	P	0.9761414872906444	0.8257641985909363
CCA	Ara+1	rep1	P	0.9914999605521269	0.8573193074516143
CCA	Ara+1	rep2	P	0.9519120663155998	0.7760351397063336
CCA	Ara+2	rep1	P	1.0496686836723765	0.9328686423492902
CCA	Ara+2	rep2	P	1.0647527739957712	0.8867255570079697
CCA	Ara+3	rep1	P	1.0006707978846374	0.8458423318218852
CCA	Ara+3	rep2	P	1.0212752703460346	0.7983719651078713
CCA	Ara+4	rep1	P	1.0565787822287622	0.877428956595536
CCA	Ara+4	rep2	P	1.031131198904715	0.8884768442280838
CCA	Ara+5	rep1	P	0.9880070444998895	0.87476733254885
CCA	Ara+5	rep2	P	0.9543043505787646	0.7853588832433923
CCA	REL606	rep1	P	0.9284058011203192	0.7953055231516785
CCA	REL606	rep2	P	0.940487553203944	0.7522280323827047
CCA	REL607	rep1	P	0.9509034922659674	0.710633682999007
CCA	REL607	rep2	P	0.9568739144378431	0.7665128958939459
CCC	Ara-1	rep1	P	0.648346835293872	0.41973241113794496
CCC	Ara-1	rep2	P	0.7640098931470107	0.5440877846692195
CCC	Ara-2	rep1	P	0.8931497516791467	0.6170862398335316
CCC	Ara-2	rep2	P	0.8925193809193018	0.6639338377504621
CCC	Ara-3	rep1	P	0.7846473162669283	0.5736098058053073
CCC	Ara-3	rep2	P	0.894899484420266	0.5727368455739793
CCC	Ara-4	rep1	P	0.8925304276955556	0.7036296825329593
CCC	Ara-4	rep2	P	0.9223305895227625	0.7209858896653217
CCC	Ara-5	rep1	P	0.8360061131701123	0.5883340511976223
CCC	Ara-5	rep2	P	0.8848247704406864	0.6757291803335636
CCC	Ara-6	rep1	P	0.9274874135442868	0.6573808475987574
CCC	Ara-6	rep2	P	0.8680758326031494	0.6476323108960944
CCC	Ara+1	rep1	P	0.791833388379692	0.4812605746074566
CCC	Ara+1	rep2	P	0.7649544191851864	0.5245989365333164
CCC	Ara+2	rep1	P	0.9170513464594109	0.6410540831271808
CCC	Ara+2	rep2	P	0.9098076009417388	0.6499389281781656
CCC	Ara+3	rep1	P	0.8684222840496292	0.6196203850386734
CCC	Ara+3	rep2	P	0.8360079550410825	0.5781457141640639
CCC	Ara+4	rep1	P	0.7788233493801081	0.5645085735873605
CCC	Ara+4	rep2	P	0.8872478993233888	0.5986260243590066
CCC	Ara+5	rep1	P	0.7180306787798535	0.5680171272215345
CCC	Ara+5	rep2	P	0.8006144180876844	0.5087301848773852
CCC	REL606	rep1	P	0.9021186452055192	0.5443230721556372
CCC	REL606	rep2	P	0.807284277509452	0.5219018101553278
CCC	REL607	rep1	P	0.8307701872327314	0.5450403036972687
CCC	REL607	rep2	P	0.7927544839793732	0.5003842074907688
CCG	Ara-1	rep1	P	0.9913035403008996	0.9673171853763547
CCG	Ara-1	rep2	P	1.064793955360705	1.1316096947444576
CCG	Ara-2	rep1	P	0.9826039905677929	1.0501312904607156
CCG	Ara-2	rep2	P	1.1824620320875707	1.399543145505022
CCG	Ara-3	rep1	P	1.0800539196653964	1.248646779377796
CCG	Ara-3	rep2	P	1.112132811651594	1.1956110721402027
CCG	Ara-4	rep1	P	1.062002092502033	1.1687178139874215
CCG	Ara-4	rep2	P	1.1240043154437178	1.2511470046676427
CCG	Ara-5	rep1	P	0.972916255912533	0.9775876945318381
CCG	Ara-5	rep2	P	1.1067117211808883	1.2092091750533718
CCG	Ara-6	rep1	P	1.0967913461608159	1.229354446515807
CCG	Ara-6	rep2	P	1.0776270812791586	1.1329303903144055
CCG	Ara+1	rep1	P	0.9522835365523917	0.9660655392266927
CCG	Ara+1	rep2	P	1.029710261620393	1.0241919879010632
CCG	Ara+2	rep1	P	1.0180046766189772	1.147878149741945
CCG	Ara+2	rep2	P	1.0709710472007063	1.1965853221951004
CCG	Ara+3	rep1	P	1.0505914532426974	1.1262353028426186
CCG	Ara+3	rep2	P	1.0665871329594088	1.1498760145634448
CCG	Ara+4	rep1	P	1.0299863108388958	1.0911538355544252
CCG	Ara+4	rep2	P	1.048304711188411	1.1247766868686955
CCG	Ara+5	rep1	P	1.0137917714226274	1.0868407874072912
CCG	Ara+5	rep2	P	1.0336833259385134	1.094897802800839
CCG	REL606	rep1	P	0.9996459199360991	1.0628507839683674
CCG	REL606	rep2	P	1.0502883393286517	1.0941275746410788
CCG	REL607	rep1	P	0.9538215018114561	0.9515618836914024
CCG	REL607	rep2	P	0.983124948052125	1.0072781207344998
CCT	Ara-1	rep1	P	0.9661915560075333	0.7650390662317171
CCT	Ara-1	rep2	P	0.9007327644258395	0.7528884232631515
CCT	Ara-2	rep1	P	0.9605180077994997	0.844842230486049
CCT	Ara-2	rep2	P	1.0379545039282911	0.8866609657142526
CCT	Ara-3	rep1	P	0.9660127895823777	0.8026487391612709
CCT	Ara-3	rep2	P	0.9594768115911824	0.7635576845570154
CCT	Ara-4	rep1	P	0.9782620852950298	0.8023961849234854
CCT	Ara-4	rep2	P	0.9087076662897778	0.7927125422819424
CCT	Ara-5	rep1	P	0.9486542491050164	0.821655867407374
CCT	Ara-5	rep2	P	0.9147869273468133	0.8457927605136341
CCT	Ara-6	rep1	P	0.9848792485511217	0.874844210347964
CCT	Ara-6	rep2	P	0.9336038767479633	0.8002656767205634
CCT	Ara+1	rep1	P	0.9682966199628187	0.7956941816136126
CCT	Ara+1	rep2	P	0.9610433912670661	0.805317935750104
CCT	Ara+2	rep1	P	0.9701468532682489	0.8368693497761109
CCT	Ara+2	rep2	P	1.0043238939242696	0.8458837403435404
CCT	Ara+3	rep1	P	0.9396817166798437	0.7304580649299607
CCT	Ara+3	rep2	P	0.9429121570270373	0.7545663721735023
CCT	Ara+4	rep1	P	0.8732398402844767	0.7848838410075202
CCT	Ara+4	rep2	P	0.8738868042606003	0.7349511135901946
CCT	Ara+5	rep1	P	0.9739077469307654	0.8355612514805246
CCT	Ara+5	rep2	P	0.9356986184576292	0.7845873543145394
CCT	REL606	rep1	P	0.8941401672853586	0.7407321922592869
CCT	REL606	rep2	P	0.8993425235506789	0.7625508537247563
CCT	REL607	rep1	P	0.8836399394529117	0.7050899090981477
CCT	REL607	rep2	P	0.8114129356779076	0.67961025017717
CGA	Ara-1	rep1	R	1.2323039809963183	1.4945557917912635
CGA	Ara-1	rep2	R	1.0457228868086597	1.396868547145918
CGA	Ara-2	rep1	R	1.077976890461823	1.2852770333043202
CGA	Ara-2	rep2	R	1.0274901201608542	1.1517498115417357
CGA	Ara-3	rep1	R	0.9947024262296412	1.427711372061045
CGA	Ara-3	rep2	R	1.224169583893355	1.6882247129262982
CGA	Ara-4	rep1	R	0.9121622145461781	0.9351984491563287
CGA	Ara-4	rep2	R	1.0012021667411075	1.1211329759364876
CGA	Ara-5	rep1	R	1.0948404845756408	1.295795210931559
CGA	Ara-5	rep2	R	0.992395586868913	1.2338205793161543
CGA	Ara-6	rep1	R	1.027135434309633	1.1871245678192301
CGA	Ara-6	rep2	R	1.0848504550405378	1.2462214253443515
CGA	Ara+1	rep1	R	1.0969422182099127	1.0574679008133585
CGA	Ara+1	rep2	R	1.153577913967416	1.418771947345693
CGA	Ara+2	rep1	R	1.1519892263157054	1.3072672111252706
CGA	Ara+2	rep2	R	1.0032444164331094	1.2221732344795546
CGA	Ara+3	rep1	R	1.158884271178079	1.473558852440162
CGA	Ara+3	rep2	R	1.014896849033289	1.1831314053189257
CGA	Ara+4	rep1	R	0.9376692905345505	1.1066712601906872
CGA	Ara+4	rep2	R	0.9617487804266519	1.2004257362379458
CGA	Ara+5	rep1	R	1.0413911949240315	1.231574525617828
CGA	Ara+5	rep2	R	1.0014288651259808	1.2750089814699774
CGA	REL606	rep1	R	1.012938024939082	0.9614746491165771
CGA	REL606	rep2	R	1.0084320286928736	1.1530125088050147
CGA	REL607	rep1	R	0.9597058051193282	1.1440866191125734
CGA	REL607	rep2	R	0.964247244791353	1.1281706785317613
CGC	Ara-1	rep1	R	0.8006795882364325	0.6759010425620798
CGC	Ara-1	rep2	R	0.8636741396443872	0.7244236298405852
CGC	Ara-2	rep1	R	0.8341034455613047	0.7194219677555855
CGC	Ara-2	rep2	R	0.8944800341807181	0.7794429655136403
CGC	Ara-3	rep1	R	0.8388703766824259	0.7122375706377165
CGC	Ara-3	rep2	R	0.930518170468624	0.9087847738192347
CGC	Ara-4	rep1	R	0.8453453439639241	0.7465505166394145
CGC	Ara-4	rep2	R	0.9438190618266397	0.9308090641222161
CGC	Ara-5	rep1	R	0.8448709161884426	0.7526408977267872
CGC	Ara-5	rep2	R	0.888506356232797	0.8529490014812791
CGC	Ara-6	rep1	R	0.8270624478900196	0.7576360122844299
CGC	Ara-6	rep2	R	0.9051348586792759	0.8664615537408572
CGC	Ara+1	rep1	R	0.7954680674890857	0.6668206693525239
CGC	Ara+1	rep2	R	0.8350365624872956	0.7312382259990025
CGC	Ara+2	rep1	R	0.7607221233677687	0.6810300386813212
CGC	Ara+2	rep2	R	0.8225489185333857	0.7379024140959072
CGC	Ara+3	rep1	R	0.8555421855274719	0.7341497266060993
CGC	Ara+3	rep2	R	0.9091162329605363	0.8339420570609899
CGC	Ara+4	rep1	R	0.8816559276075893	0.8190061050649915
CGC	Ara+4	rep2	R	0.907013924002244	0.8864095565171398
CGC	Ara+5	rep1	R	0.8012308910466174	0.7248688334100781
CGC	Ara+5	rep2	R	0.860722759445158	0.782489637192917
CGC	REL606	rep1	R	0.8252711374856544	0.7050724052162217
CGC	REL606	rep2	R	0.8849278895954903	0.8472067909393365
CGC	REL607	rep1	R	0.8437868109426367	0.7311169940803275
CGC	REL607	rep2	R	0.8740611787254017	0.7993959123114203
CGG	Ara-1	rep1	R	0.892783937214014	1.0800777165698774
CGG	Ara-1	rep2	R	0.8437659642835215	1.0337056850841824
CGG	Ara-2	rep1	R	0.9124152982409133	1.0564211624510995
CGG	Ara-2	rep2	R	0.9570740454141579	1.1446286994979162
CGG	Ara-3	rep1	R	1.009324160039691	1.4091766556660341
CGG	Ara-3	rep2	R	1.1372750756130887	1.5206685379995526
CGG	Ara-4	rep1	R	0.8044670733300705	0.971444818109404
CGG	Ara-4	rep2	R	0.9707276522600623	1.190152056723558
CGG	Ara-5	rep1	R	0.8902202574362346	1.1934468163237066
CGG	Ara-5	rep2	R	1.0614018958218678	1.3756560271640939
CGG	Ara-6	rep1	R	0.9243753219558665	1.1527786009710708
CGG	Ara-6	rep2	R	1.0812216886871753	1.3840005809275364
CGG	Ara+1	rep1	R	0.8631782333220938	1.060498136460328
CGG	Ara+1	rep2	R	1.0133091115749069	1.265179330103257
CGG	Ara+2	rep1	R	0.8784584296934665	1.03253391553688
CGG	Ara+2	rep2	R	1.035392494725184	1.221703417026086
CGG	Ara+3	rep1	R	0.8519373162135705	1.0029957537347023
CGG	Ara+3	rep2	R	1.0364610219683674	1.3890722524929964
CGG	Ara+4	rep1	R	0.9496961265740438	1.0751994846111512
CGG	Ara+4	rep2	R	0.9416206692670653	1.0614966413007252
CGG	Ara+5	rep1	R	0.9091804010173846	1.1457992972288096
CGG	Ara+5	rep2	R	1.0573060451994978	1.3525571720452456
CGG	REL606	rep1	R	0.8210976796405554	0.984967298203683
CGG	REL606	rep2	R	1.0247438677611438	1.3586207913084805
CGG	REL607	rep1	R	0.859895677052491	1.0688767229725766
CGG	REL607	rep2	R	1.0547752716543835	1.3321888824791712
CGT	Ara-1	rep1	R	0.9192405373939132	0.8704546085613318
CGT	Ara-1	rep2	R	0.9731329394488891	1.0153573502924769
CGT	Ara-2	rep1	R	0.9173878629906904	0.8907106198000658
CGT	Ara-2	rep2	R	0.9030564039844595	0.8851709420585588
CGT	Ara-3	rep1	R	0.9372352172203469	0.9716169519408931
CGT	Ara-3	rep2	R	1.0145426666869204	1.0796647970287607
CGT	Ara-4	rep1	R	0.9157929534654794	0.908252094312317
CGT	Ara-4	rep2	R	1.0022219797792402	1.0581835036090181
CGT	Ara-5	rep1	R	0.9208809180491343	0.9234469248367733
CGT	Ara-5	rep2	R	0.9388390147772423	0.9692844753588595
CGT	Ara-6	rep1	R	0.9034705234843925	0.9178654688338719
CGT	Ara-6	rep2	R	0.9882238634873921	1.0133559531553786
CGT	Ara+1	rep1	R	0.8457456853439334	0.8162616625465122
CGT	Ara+1	rep2	R	0.9338367736036823	0.9540587880835347
CGT	Ara+2	rep1	R	0.87834890089918	0.8452921640388474
CGT	Ara+2	rep2	R	0.9127244425143822	0.9173448556297582
CGT	Ara+3	rep1	R	0.9404567311058094	0.9395721573198995
CGT	Ara+3	rep2	R	0.9561566645826445	0.9988209198927013
CGT	Ara+4	rep1	R	0.9497013802401063	0.9460387968490042
CGT	Ara+4	rep2	R	0.9859529363666283	1.045571223251713
CGT	Ara+5	rep1	R	0.8960144663526981	0.8855235949291892
CGT	Ara+5	rep2	R	0.9729161830257876	0.9877829988838743
CGT	REL606	rep1	R	0.927829904176447	0.9374402668018155
CGT	REL606	rep2	R	0.9690944787453465	1.0184646616952733
CGT	REL607	rep1	R	0.938219970995592	0.9345007332288027
CGT	REL607	rep2	R	0.9631009686121526	0.9491809791409145
CTA	Ara-1	rep1	L	0.944794788931986	0.7339365584343847
CTA	Ara-1	rep2	L	0.8773469345508503	0.6584458592414669
CTA	Ara-2	rep1	L	0.9981555648168745	0.9703494700383021
CTA	Ara-2	rep2	L	1.06463727015608	0.9496584817737984
CTA	Ara-3	rep1	L	0.9737968822105365	0.7220423475371212
CTA	Ara-3	rep2	L	0.9073439554040601	0.7439739599948147
CTA	Ara-4	rep1	L	0.9093699733189586	0.9142026158663857
CTA	Ara-4	rep2	L	0.8958000269349047	0.8620668157317553
CTA	Ara-5	rep1	L	1.0433309892769025	0.9574573401296788
CTA	Ara-5	rep2	L	0.9620363045478924	0.8963583880846082
CTA	Ara-6	rep1	L	1.016970011233288	0.8664635338079874
CTA	Ara-6	rep2	L	0.9276744738182934	0.7815208033630071
CTA	Ara+1	rep1	L	0.8310769815966526	0.8236425161072491
CTA	Ara+1	rep2	L	0.9386832612561463	0.7550192267150189
CTA	Ara+2	rep1	L	0.9334784094360998	0.9419972233801149
CTA	Ara+2	rep2	L	0.9960085817654449	0.9567377942909617
CTA	Ara+3	rep1	L	0.882101961002124	0.7861495855899784
CTA	Ara+3	rep2	L	0.925603926690227	0.8818446281430381
CTA	Ara+4	rep1	L	0.9130772867060943	0.8850665198648309
CTA	Ara+4	rep2	L	0.936589099686982	0.9650983089450614
CTA	Ara+5	rep1	L	0.9701770624125163	0.8772230496920178
CTA	Ara+5	rep2	L	0.9610316670070348	0.9204392323760724
CTA	REL606	rep1	L	0.9927561997442728	0.8372383848060836
CTA	REL606	rep2	L	0.9666999589786425	0.8618264831170401
CTA	REL607	rep1	L	0.9464749402334601	0.8426361375175745
CTA	REL607	rep2	L	1.0041532706137493	0.8621520584500993
CTC	Ara-1	rep1	L	0.8715090415827217	0.8298655333526187
CTC	Ara-1	rep2	L	0.9629508671170061	0.9302885464871681
CTC	Ara-2	rep1	L	0.8883186614742559	0.8955217678324222
CTC	Ara-2	rep2	L	0.899496061485865	0.8152755218941717
CTC	Ara-3	rep1	L	0.8304174073660694	0.7188297980715448
CTC	Ara-3	rep2	L	0.8505227637486784	0.7514242443178777
CTC	Ara-4	rep1	L	0.9349049922164945	0.8444687939328911
CTC	Ara-4	rep2	L	0.9464736814161966	0.8629953362375791
CTC	Ara-5	rep1	L	0.8663414189160266	0.8372730473789803
CTC	Ara-5	rep2	L	0.9149686413361672	0.8533946337110108
CTC	Ara-6	rep1	L	0.931725423874662	0.8406655640334061
CTC	Ara-6	rep2	L	0.9356551030762096	0.8115538556069013
CTC	Ara+1	rep1	L	0.8324789751872346	0.7871801652608728
CTC	Ara+1	rep2	L	0.8768145685572523	0.7906506383654386
CTC	Ara+2	rep1	L	0.8743166622823565	0.8041680434880302
CTC	Ara+2	rep2	L	0.8731285418894665	0.7668398548417947
CTC	Ara+3	rep1	L	0.9024064682619348	0.8185480529538046
CTC	Ara+3	rep2	L	0.8844021899103557	0.809094837721526
CTC	Ara+4	rep1	L	0.866445050820358	0.7910643788951146
CTC	Ara+4	rep2	L	0.8793017415505794	0.7883715673934791
CTC	Ara+5	rep1	L	0.8877378897654907	0.8081706912613907
CTC	Ara+5	rep2	L	0.8963952600183739	0.8507811315864381
CTC	REL606	rep1	L	0.9296229056425196	0.892498604680807
CTC	REL606	rep2	L	0.9154635693206745	0.8155030843446835
CTC	REL607	rep1	L	0.8833326722584824	0.8047168211762732
CTC	REL607	rep2	L	0.9178812926247254	0.8609407732238347
CTG	Ara-1	rep1	L	0.8825338304671684	0.9254553250656673
CTG	Ara-1	rep2	L	0.9093224659565443	1.0080900934661308
CTG	Ara-2	rep1	L	0.8993738141863501	0.9722884629155771
CTG	Ara-2	rep2	L	0.9417455330267438	1.0644544342182043
CTG	Ara-3	rep1	L	0.8467405969619967	0.8943016838638663
CTG	Ara-3	rep2	L	0.8918296302913074	0.9752072548373033
CTG	Ara-4	rep1	L	0.8746375976354562	0.9193667284479436
CTG	Ara-4	rep2	L	0.8735761278120598	0.9371552794133162
CTG	Ara-5	rep1	L	0.9050697136629462	0.9730130671658157
CTG	Ara-5	rep2	L	0.9209724569741876	1.0478868785594928
CTG	Ara-6	rep1	L	0.8639994064038201	0.9145938365963394
CTG	Ara-6	rep2	L	0.9112175503304252	0.9936997806758928
CTG	Ara+1	rep1	L	0.8835489684383747	0.9738862824266498
CTG	Ara+1	rep2	L	0.902527621942275	1.0011936274496414
CTG	Ara+2	rep1	L	0.841340375308192	0.8685918997603731
CTG	Ara+2	rep2	L	0.8504571707391277	0.9204225229409578
CTG	Ara+3	rep1	L	0.8379113455426462	0.8772521535305892
CTG	Ara+3	rep2	L	0.8590777700593532	0.9155699026097245
CTG	Ara+4	rep1	L	0.8512500414143694	0.8888421336297376
CTG	Ara+4	rep2	L	0.8817325219316944	0.9233767655735597
CTG	Ara+5	rep1	L	0.9029175519246141	0.9891483411804215
CTG	Ara+5	rep2	L	0.8961351527056125	0.9989233264757621
CTG	REL606	rep1	L	0.8715789579364123	0.9642746597181097
CTG	REL606	rep2	L	0.9257075964384612	1.045312420106
CTG	REL607	rep1	L	0.8831297420481654	0.9814795836425216
CTG	REL607	rep2	L	0.8846572688237635	0.9994735029079888
CTT	Ara-1	rep1	L	0.84262951487593	0.5648563793428534
CTT	Ara-1	rep2	L	0.8780100655902867	0.5937981095673204
CTT	Ara-2	rep1	L	0.777672578854541	0.5927082144326827
CTT	Ara-2	rep2	L	0.7772467308425081	0.5697638045451716
CTT	Ara-3	rep1	L	0.7808803969891761	0.5218666579554624
CTT	Ara-3	rep2	L	0.749633839085895	0.5488156736818045
CTT	Ara-4	rep1	L	0.8132427014976101	0.6503240532746999
CTT	Ara-4	rep2	L	0.8067709731986571	0.6476437530541881
CTT	Ara-5	rep1	L	0.8336410817958949	0.6007319774736072
CTT	Ara-5	rep2	L	0.8046523310826156	0.5989355528132106
CTT	Ara-6	rep1	L	0.747428982220273	0.5829269214809015
CTT	Ara-6	rep2	L	0.7749162021599767	0.6260860536544269
CTT	Ara+1	rep1	L	0.7992650296629091	0.5621570263788576
CTT	Ara+1	rep2	L	0.8353515604364772	0.599350912062763
CTT	Ara+2	rep1	L	0.7779957006188808	0.5874264376471966
CTT	Ara+2	rep2	L	0.7943165064028013	0.6125794308978328
CTT	Ara+3	rep1	L	0.7764168175677935	0.5561546937925207
CTT	Ara+3	rep2	L	0.8072783950521595	0.5932622643744158
CTT	Ara+4	rep1	L	0.8155560303504953	0.5939693925655606
CTT	Ara+4	rep2	L	0.8003108536428761	0.6266621983902247
CTT	Ara+5	rep1	L	0.8227271231562265	0.5861257379542839
CTT	Ara+5	rep2	L	0.8174997807952656	0.6188747206781549
CTT	REL606	rep1	L	0.8117942663250847	0.5906844331469738
CTT	REL606	rep2	L	0.8205753349940811	0.5926140082287362
CTT	REL607	rep1	L	0.7840652694348592	0.5807741970161129
CTT	REL607	rep2	L	0.8161218962172935	0.5960153147922478
GAA	Ara-1	rep1	E	1.1563691588535063	1.487175601368956
GAA	Ara-1	rep2	E	1.11354518456805	1.4257942918103386
GAA	Ara-2	rep1	E	1.147678096550886	1.432479613148521
GAA	Ara-2	rep2	E	1.1162438753853674	1.3789264927175857
GAA	Ara-3	rep1	E	1.096726490353958	1.366031316304114
GAA	Ara-3	rep2	E	1.0963587067768938	1.2756723248829274
GAA	Ara-4	rep1	E	1.1051339068969437	1.35109705652498
GAA	Ara-4	rep2	E	1.1257638086843016	1.3168579322549596
GAA	Ara-5	rep1	E	1.1539695000825125	1.4482077389791967
GAA	Ara-5	rep2	E	1.1427852068676139	1.4024830610866543
GAA	Ara-6	rep1	E	1.1613991720133792	1.4504300210455203
GAA	Ara-6	rep2	E	1.1243801557127	1.3162631444620894
GAA	Ara+1	rep1	E	1.1730039685898066	1.4641785541217234
GAA	Ara+1	rep2	E	1.1121002668253566	1.3849234055432897
GAA	Ara+2	rep1	E	1.1952550831762168	1.53671566163693
GAA	Ara+2	rep2	E	1.1724103267818982	1.4793525166603594
GAA	Ara+3	rep1	E	1.1859441013652767	1.5038710381112501
GAA	Ara+3	rep2	E	1.1568832737533565	1.4289750793672056
GAA	Ara+4	rep1	E	1.1037577960212972	1.357153413516916
GAA	Ara+4	rep2	E	1.0736979991256994	1.2696799797530611
GAA	Ara+5	rep1	E	1.1732147697948734	1.528794360062629
GAA	Ara+5	rep2	E	1.1746171642271992	1.4621925843025467
GAA	REL606	rep1	E	1.1032325059810604	1.4034518475484035
GAA	REL606	rep2	E	1.1120102501295028	1.3334407194986353
GAA	REL607	rep1	E	1.1603523686046566	1.470252584214316
GAA	REL607	rep2	E	1.110765642494708	1.3928676413370356
GAC	Ara-1	rep1	D	1.1664376176249227	1.5355631321469008
GAC	Ara-1	rep2	D	1.111415067252392	1.4386843395235827
GAC	Ara-2	rep1	D	1.185846662708919	1.575852974632973
GAC	Ara-2	rep2	D	1.1464370380160926	1.4904691479722778
GAC	Ara-3	rep1	D	1.1407676320817763	1.5299688930423359
GAC	Ara-3	rep2	D	1.1711511800546741	1.461790581932565
GAC	Ara-4	rep1	D	1.0720078786905074	1.3653860229742492
GAC	Ara-4	rep2	D	1.1607878568138705	1.4367495690435608
GAC	Ara-5	rep1	D	1.1484698828555129	1.5346434390162857
GAC	Ara-5	rep2	D	1.2011420494230922	1.5666786235403733
GAC	Ara-6	rep1	D	1.1900955188352875	1.511587469606036
GAC	Ara-6	rep2	D	1.1873971540805222	1.4396161441852715
GAC	Ara+1	rep1	D	1.2375030125895117	1.6981399065011313
GAC	Ara+1	rep2	D	1.2105549038212255	1.6194081563073703
GAC	Ara+2	rep1	D	1.176255328930958	1.5788296629558887
GAC	Ara+2	rep2	D	1.1480505288185958	1.4428907089652971
GAC	Ara+3	rep1	D	1.1744079875799696	1.6319409894060182
GAC	Ara+3	rep2	D	1.2113207640417853	1.5913495198055614
GAC	Ara+4	rep1	D	1.147782486432686	1.4570444942766037
GAC	Ara+4	rep2	D	1.1907472396229986	1.4893586748323588
GAC	Ara+5	rep1	D	1.2456752556475872	1.663383736181248
GAC	Ara+5	rep2	D	1.219181171892413	1.5747987174449125
GAC	REL606	rep1	D	1.197856325199227	1.6809955624699053
GAC	REL606	rep2	D	1.2485428162537437	1.6296792174566692
GAC	REL607	rep1	D	1.2615648211090478	1.7228288068957096
GAC	REL607	rep2	D	1.2198312925815558	1.6040884789646916
GAG	Ara-1	rep1	E	1.1514520138764326	1.4344191291604746
GAG	Ara-1	rep2	E	1.098333363480358	1.2510015523231528
GAG	Ara-2	rep1	E	1.3679891709762382	1.8868670861476748
GAG	Ara-2	rep2	E	1.2894482378857839	1.7089496121098018
GAG	Ara-3	rep1	E	1.501416908397867	2.2822015328900442
GAG	Ara-3	rep2	E	1.5194613827095147	2.0023036593217176
GAG	Ara-4	rep1	E	1.2103060214545256	1.513969621113829
GAG	Ara-4	rep2	E	1.147719885661351	1.34689900935109
GAG	Ara-5	rep1	E	1.1343435959437675	1.4032496629846296
GAG	Ara-5	rep2	E	1.1488856550604833	1.3479599782381477
GAG	Ara-6	rep1	E	1.2263157246710803	1.525288423751446
GAG	Ara-6	rep2	E	1.2736732434583062	1.5791350466074365
GAG	Ara+1	rep1	E	1.175199774396297	1.4044808739812675
GAG	Ara+1	rep2	E	1.1123113627431442	1.3233069901650452
GAG	Ara+2	rep1	E	1.3335426484208206	1.8498640140961078
GAG	Ara+2	rep2	E	1.2883273261567465	1.6677270578059549
GAG	Ara+3	rep1	E	1.1874600976778786	1.5863920310896042
GAG	Ara+3	rep2	E	1.152218173332435	1.4104633141508571
GAG	Ara+4	rep1	E	1.144202911482713	1.3861560337705532
GAG	Ara+4	rep2	E	1.1158237448753763	1.3120723632152882
GAG	Ara+5	rep1	E	1.2713164632670573	1.6430327064666816
GAG	Ara+5	rep2	E	1.2581967804299385	1.5691830758871717
GAG	REL606	rep1	E	1.1178473354213736	1.371127392344401
GAG	REL606	rep2	E	1.093393192108613	1.2602126315119828
GAG	REL607	rep1	E	1.1317654762025284	1.3859896186613518
GAG	REL607	rep2	E	1.098578074904952	1.3076222747150694
GAT	Ara-1	rep1	D	1.2117852043619202	1.6643875387645937
GAT	Ara-1	rep2	D	1.165091790984477	1.4671264297643947
GAT	Ara-2	rep1	D	1.2546309657945725	1.7529725159340017
GAT	Ara-2	rep2	D	1.1682326113155186	1.5486371013389366
GAT	Ara-3	rep1	D	1.1788324259891454	1.6494470293873422
GAT	Ara-3	rep2	D	1.2175356278497214	1.5399133215334713
GAT	Ara-4	rep1	D	1.2206177352913177	1.6320387951063566
GAT	Ara-4	rep2	D	1.254077748414683	1.5979279052145288
GAT	Ara-5	rep1	D	1.225605728980373	1.69987778931348
GAT	Ara-5	rep2	D	1.2250059026285127	1.5596515831711741
GAT	Ara-6	rep1	D	1.2622588264792445	1.6374450696035496
GAT	Ara-6	rep2	D	1.2020416346027487	1.4638011114970555
GAT	Ara+1	rep1	D	1.2821250587909054	1.8435804846796715
GAT	Ara+1	rep2	D	1.2197803395653775	1.6515911867095563
GAT	Ara+2	rep1	D	1.329372760467175	1.9127459096366404
GAT	Ara+2	rep2	D	1.2738444516365564	1.7215299561592523
GAT	Ara+3	rep1	D	1.261035926665705	1.8467487689965154
GAT	Ara+3	rep2	D	1.268157640614077	1.7508902605705556
GAT	Ara+4	rep1	D	1.2377080959521114	1.682680657589923
GAT	Ara+4	rep2	D	1.2473997358165725	1.6290121749010869
GAT	Ara+5	rep1	D	1.2963653241324282	1.8242317280141023
GAT	Ara+5	rep2	D	1.2383496046446032	1.646336839179509
GAT	REL606	rep1	D	1.243980518378419	1.7784453804616767
GAT	REL606	rep2	D	1.2089469660264964	1.5649003958077115
GAT	REL607	rep1	D	1.2796397600555693	1.7757305849397245
GAT	REL607	rep2	D	1.2052736678248723	1.617298308080192
GCA	Ara-1	rep1	A	0.9330963489165371	0.9408562033388134
GCA	Ara-1	rep2	A	0.8989453306994346	0.8633432116805365
GCA	Ara-2	rep1	A	0.8113494380100182	0.7445048274029884
GCA	Ara-2	rep2	A	0.8253268532717989	0.7677147351174795
GCA	Ara-3	rep1	A	0.8575191861895393	0.766280367049657
GCA	Ara-3	rep2	A	0.8328646096459372	0.7471237927880424
GCA	Ara-4	rep1	A	0.8384920701087036	0.7873381335804918
GCA	Ara-4	rep2	A	0.8261618127900782	0.7672755573004953
GCA	Ara-5	rep1	A	0.8899557295916573	0.8008803611968819
GCA	Ara-5	rep2	A	0.8225861246948364	0.7481081282101772
GCA	Ara-6	rep1	A	0.8277810747775827	0.7794062162411667
GCA	Ara-6	rep2	A	0.8130754684064624	0.7509174847730653
GCA	Ara+1	rep1	A	0.9231343145841493	0.8318531947779799
GCA	Ara+1	rep2	A	0.9080062745037237	0.7995051029374226
GCA	Ara+2	rep1	A	0.817878760203437	0.7514739851445627
GCA	Ara+2	rep2	A	0.8105183477639724	0.7178650743162369
GCA	Ara+3	rep1	A	0.8789216668423483	0.7704630747000117
GCA	Ara+3	rep2	A	0.8512058214668179	0.7936876889029777
GCA	Ara+4	rep1	A	0.8698810234940271	0.8303717537538132
GCA	Ara+4	rep2	A	0.8509433013780113	0.7747389355905088
GCA	Ara+5	rep1	A	0.8363923854283295	0.7372951269378215
GCA	Ara+5	rep2	A	0.8222461368144032	0.7579384555978651
GCA	REL606	rep1	A	0.9038842242435305	0.8228954701675735
GCA	REL606	rep2	A	0.8993315361956262	0.8048325884406691
GCA	REL607	rep1	A	0.9156571395924364	0.8395490016732471
GCA	REL607	rep2	A	0.8939095565915736	0.8202765486772269
GCC	Ara-1	rep1	A	0.8737288297856416	0.6798356753113508
GCC	Ara-1	rep2	A	0.9043225252966185	0.7458546410505836
GCC	Ara-2	rep1	A	0.7792895169880266	0.5648024319610648
GCC	Ara-2	rep2	A	0.8484106973235374	0.6672580804999165
GCC	Ara-3	rep1	A	0.8572886640727072	0.5649047123751663
GCC	Ara-3	rep2	A	0.7920120142183475	0.640750208847174
GCC	Ara-4	rep1	A	0.8322391425353142	0.675004485989423
GCC	Ara-4	rep2	A	0.9004546338922261	0.8018790114203833
GCC	Ara-5	rep1	A	0.7800993017022773	0.5787736948656594
GCC	Ara-5	rep2	A	0.8385125762724462	0.6861372964041853
GCC	Ara-6	rep1	A	0.7594892577609211	0.5805861616392839
GCC	Ara-6	rep2	A	0.7911307564139048	0.6693269147727642
GCC	Ara+1	rep1	A	0.799113735927175	0.5510051944948301
GCC	Ara+1	rep2	A	0.8441688840616576	0.6024823976877757
GCC	Ara+2	rep1	A	0.7444746813929357	0.5342684421643028
GCC	Ara+2	rep2	A	0.778188472731931	0.5964695195667942
GCC	Ara+3	rep1	A	0.8918267969637433	0.6583645738995042
GCC	Ara+3	rep2	A	0.8739720028477581	0.7138653522329846
GCC	Ara+4	rep1	A	0.8999974909904854	0.7619725172016572
GCC	Ara+4	rep2	A	0.9058901344229996	0.7508302794831148
GCC	Ara+5	rep1	A	0.7750287477998028	0.5700355552015127
GCC	Ara+5	rep2	A	0.7878953377634547	0.5930744470319512
GCC	REL606	rep1	A	0.8080447364902985	0.5881085143958505
GCC	REL606	rep2	A	0.84090245250519	0.6739281022262872
GCC	REL607	rep1	A	0.8289007201143641	0.6219216247996011
GCC	REL607	rep2	A	0.8572488213277843	0.6733584079431352
GCG	Ara-1	rep1	A	0.9726970265385881	1.0778253811119611
GCG	Ara-1	rep2	A	0.9965798649425025	1.0829006289398069
GCG	Ara-2	rep1	A	0.8560615849605548	0.8696040573740579
GCG	Ara-2	rep2	A	0.9295313922216639	1.0043349982232213
GCG	Ara-3	rep1	A	0.8835459822338186	0.9800654035917737
GCG	Ara-3	rep2	A	0.9294101970734249	1.02932577847533
GCG	Ara-4	rep1	A	0.9008315889445969	0.9095896769867551
GCG	Ara-4	rep2	A	0.9759905419922776	1.032433277663111
GCG	Ara-5	rep1	A	0.881674712042098	0.9165183793572499
GCG	Ara-5	rep2	A	0.9420882181813829	0.999066202388647
GCG	Ara-6	rep1	A	0.8752348534404245	0.8977505613555262
GCG	Ara-6	rep2	A	0.9326627467341353	0.97800929220783
GCG	Ara+1	rep1	A	0.8591837442736566	0.8547399078317907
GCG	Ara+1	rep2	A	0.8954046294843236	0.9228631128685642
GCG	Ara+2	rep1	A	0.8431991385690922	0.8197856797557086
GCG	Ara+2	rep2	A	0.9204748341200629	0.937870544550942
GCG	Ara+3	rep1	A	0.9300741737493846	0.9440767889427192
GCG	Ara+3	rep2	A	0.9639306716217019	1.057082567243246
GCG	Ara+4	rep1	A	0.9631264697448954	1.0031014697257445
GCG	Ara+4	rep2	A	0.9656305391873206	1.0306627284625198
GCG	Ara+5	rep1	A	0.8768574469604136	0.861574575842603
GCG	Ara+5	rep2	A	0.9298530022004189	0.9674248514104329
GCG	REL606	rep1	A	0.9073211457551167	0.9337683782502337
GCG	REL606	rep2	A	0.945998326172765	0.9956138121728126
GCG	REL607	rep1	A	0.9176880785595266	0.9308500113457143
GCG	REL607	rep2	A	0.9490871252468761	1.0343584552555216
GCT	Ara-1	rep1	A	0.9190132181111099	0.9079258865721448
GCT	Ara-1	rep2	A	0.9577674372566899	0.9542241181770593
GCT	Ara-2	rep1	A	0.8529572728751398	0.7620477149106387
GCT	Ara-2	rep2	A	0.8718264026011106	0.7938843238940241
GCT	Ara-3	rep1	A	0.8519803958168565	0.7484618061762236
GCT	Ara-3	rep2	A	0.8189587815417898	0.7283624012725713
GCT	Ara-4	rep1	A	0.8450014983275651	0.7511153059360258
GCT	Ara-4	rep2	A	0.8742060874131041	0.8253406308793568
GCT	Ara-5	rep1	A	0.9114824993860552	0.8210963519993826
GCT	Ara-5	rep2	A	0.9321749590011361	0.8859572409426021
GCT	Ara-6	rep1	A	0.8481636673141321	0.785171468153484
GCT	Ara-6	rep2	A	0.8598672140831963	0.7812429645319999
GCT	Ara+1	rep1	A	0.9160160190330213	0.8261116868717235
GCT	Ara+1	rep2	A	0.9216475813027861	0.8594958148478339
GCT	Ara+2	rep1	A	0.844592159658299	0.7382936405392833
GCT	Ara+2	rep2	A	0.8441733137072324	0.730931603808972
GCT	Ara+3	rep1	A	0.8681944609978804	0.7833357928797359
GCT	Ara+3	rep2	A	0.888309660843508	0.8211389480977955
GCT	Ara+4	rep1	A	0.8935836679636591	0.8439768288155897
GCT	Ara+4	rep2	A	0.8649931878089041	0.8128760786281812
GCT	Ara+5	rep1	A	0.8685807972884045	0.7653405816674355
GCT	Ara+5	rep2	A	0.8692445877761359	0.7913246831871301
GCT	REL606	rep1	A	0.8963280817428388	0.8504745036996979
GCT	REL606	rep2	A	0.9058505158938999	0.8689031004896134
GCT	REL607	rep1	A	0.9113258146869253	0.8553020040292707
GCT	REL607	rep2	A	0.9283955930747962	0.8812722484331744
GGA	Ara-1	rep1	G	1.0927711697379539	1.500552589122159
GGA	Ara-1	rep2	G	1.1212355710118815	1.7195928391665847
GGA	Ara-2	rep1	G	1.0603603834332875	1.3569884990044456
GGA	Ara-2	rep2	G	1.111310202640736	1.4208734194719843
GGA	Ara-3	rep1	G	1.0019673691070778	1.3454152806865909
GGA	Ara-3	rep2	G	1.066159346170741	1.3893579824355762
GGA	Ara-4	rep1	G	1.0488128783079633	1.2605724476906928
GGA	Ara-4	rep2	G	1.0371138622605114	1.230573401367419
GGA	Ara-5	rep1	G	1.0138973342028916	1.3665383780131017
GGA	Ara-5	rep2	G	1.0837693266204282	1.4890795614028531
GGA	Ara-6	rep1	G	1.0462259099529128	1.3128670302427279
GGA	Ara-6	rep2	G	1.056242411020393	1.3054236489843873
GGA	Ara+1	rep1	G	1.1156069860981015	1.5525775346452257
GGA	Ara+1	rep2	G	1.111792212154957	1.6828544209598355
GGA	Ara+2	rep1	G	1.0665568250962039	1.375952761458625
GGA	Ara+2	rep2	G	1.0353380929483909	1.3474593733976234
GGA	Ara+3	rep1	G	1.0387432914365933	1.330207380605947
GGA	Ara+3	rep2	G	0.9917627478222342	1.2069394862059077
GGA	Ara+4	rep1	G	0.9614016069222929	1.2269784214359725
GGA	Ara+4	rep2	G	1.042068579863853	1.3489497182378498
GGA	Ara+5	rep1	G	1.0164396935909876	1.3308343599787305
GGA	Ara+5	rep2	G	1.0195570168427466	1.3493137796429058
GGA	REL606	rep1	G	0.9638603439298342	1.4181054267920692
GGA	REL606	rep2	G	1.0272397497249237	1.375699121013167
GGA	REL607	rep1	G	0.959349821352661	1.3212896232584808
GGA	REL607	rep2	G	0.96724918170675	1.2759167460484686
GGC	Ara-1	rep1	G	0.8364655956484534	0.7987520644908883
GGC	Ara-1	rep2	G	0.8950836528560141	0.9182966398365492
GGC	Ara-2	rep1	G	0.7937609156620851	0.7329050626323685
GGC	Ara-2	rep2	G	0.8400763738032022	0.819652647564339
GGC	Ara-3	rep1	G	0.8444697436016921	0.7860766153405251
GGC	Ara-3	rep2	G	0.8701961920921403	0.9030738048782608
GGC	Ara-4	rep1	G	0.8402664083775794	0.79385356027091325
GGC	Ara-4	rep2	G	0.8491057165567456	0.8514113887317732
GGC	Ara-5	rep1	G	0.806957440093276	0.7641292999471958
GGC	Ara-5	rep2	G	0.8820000880050013	0.8892996198913584
GGC	Ara-6	rep1	G	0.8018614982796136	0.812061912345522
GGC	Ara-6	rep2	G	0.8569999186591752	0.8853076152714832
GGC	Ara+1	rep1	G	0.8605552522098759	0.8478349989448057
GGC	Ara+1	rep2	G	0.883130013628019	0.9141352441349578
GGC	Ara+2	rep1	G	0.7550927275947706	0.6809301589385823
GGC	Ara+2	rep2	G	0.7877378108995792	0.7687679176950161
GGC	Ara+3	rep1	G	0.8147510003748818	0.7401989571516431
GGC	Ara+3	rep2	G	0.7898056182918699	0.7692632613180881
GGC	Ara+4	rep1	G	0.8406302921736779	0.8008868900782493
GGC	Ara+4	rep2	G	0.873210385269513	0.8691652637638757
GGC	Ara+5	rep1	G	0.8023594479036096	0.7468471875683796
GGC	Ara+5	rep2	G	0.8113244397323575	0.7722862448684369
GGC	REL606	rep1	G	0.8184007142831704	0.8085265983952905
GGC	REL606	rep2	G	0.888171326060938	0.9452673076937952
GGC	REL607	rep1	G	0.8067648126150945	0.7856060420894154
GGC	REL607	rep2	G	0.8299341279982151	0.8300238628227478
GGG	Ara-1	rep1	G	0.8309270736024598	0.7501386588430498
GGG	Ara-1	rep2	G	0.9439816840452466	0.9666265627626086
GGG	Ara-2	rep1	G	0.7543565455727528	0.7498567424379079
GGG	Ara-2	rep2	G	0.863707637984116	0.8542921592065001
GGG	Ara-3	rep1	G	0.9567582567495042	1.0438100939223538
GGG	Ara-3	rep2	G	1.0432013777123608	1.1973475859121503
GGG	Ara-4	rep1	G	0.774236636465289	0.7170646601956102
GGG	Ara-4	rep2	G	0.8161577819346875	0.8201430356754745
GGG	Ara-5	rep1	G	0.7945748056913704	0.7561082391828038
GGG	Ara-5	rep2	G	0.8445605560182886	0.856746654221617
GGG	Ara-6	rep1	G	0.7645600444813582	0.7209086842654877
GGG	Ara-6	rep2	G	0.8396856579949951	0.866515000521909
GGG	Ara+1	rep1	G	0.7904303489689164	0.6919810746276425
GGG	Ara+1	rep2	G	0.8525848046542962	0.8131708613134628
GGG	Ara+2	rep1	G	0.7091511151997809	0.5969258768180309
GGG	Ara+2	rep2	G	0.7240487418663824	0.702372846263907
GGG	Ara+3	rep1	G	0.80033690926198	0.7065981059164774
GGG	Ara+3	rep2	G	0.7284165306639269	0.6911497830767291
GGG	Ara+4	rep1	G	0.8260628929740934	0.6914156717137575
GGG	Ara+4	rep2	G	0.8107107023217923	0.7728553817205975
GGG	Ara+5	rep1	G	0.821607275285811	0.7105460980471339
GGG	Ara+5	rep2	G	0.7568203267839088	0.7057948161476107
GGG	REL606	rep1	G	0.8218931882964664	0.7820289592811821
GGG	REL606	rep2	G	0.8393435373278423	0.8505109321309714
GGG	REL607	rep1	G	0.7701281782275784	0.7152389804662914
GGG	REL607	rep2	G	0.7802084232324594	0.7339132946136062
GGT	Ara-1	rep1	G	0.7935464401524697	0.7300575718028599
GGT	Ara-1	rep2	G	0.8609277758023766	0.8555931914375523
GGT	Ara-2	rep1	G	0.7865245478490713	0.7419231575267875
GGT	Ara-2	rep2	G	0.7962771033356408	0.7618762903462728
GGT	Ara-3	rep1	G	0.7933596071628417	0.7226071383808985
GGT	Ara-3	rep2	G	0.8132878407322718	0.7945038110315661
GGT	Ara-4	rep1	G	0.781134331262876	0.7488115057564952
GGT	Ara-4	rep2	G	0.8086165919123126	0.8008069045783978
GGT	Ara-5	rep1	G	0.7921468701364424	0.734279006167528
GGT	Ara-5	rep2	G	0.8122474366287551	0.7736155840074508
GGT	Ara-6	rep1	G	0.7524500726067596	0.7010538221856305
GGT	Ara-6	rep2	G	0.7840917320280082	0.7722387174908864
GGT	Ara+1	rep1	G	0.7950531256567683	0.7851539074197637
GGT	Ara+1	rep2	G	0.8219074699984289	0.8248467985090635
GGT	Ara+2	rep1	G	0.7623740734476849	0.7029382446779305
GGT	Ara+2	rep2	G	0.7729580135949266	0.7244682868422706
GGT	Ara+3	rep1	G	0.7587635528409266	0.6954335523884448
GGT	Ara+3	rep2	G	0.7567845614674562	0.7097997386646504
GGT	Ara+4	rep1	G	0.7819841770889688	0.7384121813737583
GGT	Ara+4	rep2	G	0.8281641660179233	0.7967413478518726
GGT	Ara+5	rep1	G	0.7520102959902024	0.6726220426878808
GGT	Ara+5	rep2	G	0.7720830956552838	0.7059502376547917
GGT	REL606	rep1	G	0.7754258630613698	0.7251996160474798
GGT	REL606	rep2	G	0.8074761190564811	0.7868512155876207
GGT	REL607	rep1	G	0.7602722015644432	0.7154432215851091
GGT	REL607	rep2	G	0.7720194779749704	0.7040508604205564
GTA	Ara-1	rep1	V	1.0799063164419558	1.2388956502500064
GTA	Ara-1	rep2	V	1.043318127435918	1.0993498585449233
GTA	Ara-2	rep1	V	0.972829234375533	1.0434992809403068
GTA	Ara-2	rep2	V	0.9468483320566395	0.9853349516076779
GTA	Ara-3	rep1	V	0.9989654214046007	1.0631091433693238
GTA	Ara-3	rep2	V	0.9610563733460207	1.011874739051887
GTA	Ara-4	rep1	V	1.0251393181189619	1.0416166199790702
GTA	Ara-4	rep2	V	0.9658769579445897	1.0043107668253577
GTA	Ara-5	rep1	V	1.2118617242526775	1.3638280176381852
GTA	Ara-5	rep2	V	1.0902462518195353	1.1328665346930422
GTA	Ara-6	rep1	V	0.9916191347345622	1.0570382809918348
GTA	Ara-6	rep2	V	0.9674213671636168	1.0309110751779933
GTA	Ara+1	rep1	V	1.1102571364359057	1.229832861728444
GTA	Ara+1	rep2	V	1.1114869491150698	1.1831317432750947
GTA	Ara+2	rep1	V	1.0838046289391747	1.1157447593314003
GTA	Ara+2	rep2	V	1.0732443863128884	1.1136499771661759
GTA	Ara+3	rep1	V	1.0532972470349584	1.2473828819939792
GTA	Ara+3	rep2	V	1.0772488354831844	1.1547721767363408
GTA	Ara+4	rep1	V	1.0241666379163334	1.1213747778210912
GTA	Ara+4	rep2	V	1.012506121678194	1.0541045416324955
GTA	Ara+5	rep1	V	1.121532747995519	1.2255576639795063
GTA	Ara+5	rep2	V	1.1051755070517846	1.2391574565201926
GTA	REL606	rep1	V	1.1409972482957305	1.2569241342828386
GTA	REL606	rep2	V	1.0766224279265222	1.1339741184138863
GTA	REL607	rep1	V	1.1149558731906752	1.302847499374164
GTA	REL607	rep2	V	1.11512353816285	1.3031878536428922
GTC	Ara-1	rep1	V	1.0384623327109967	1.182689344077277
GTC	Ara-1	rep2	V	1.0621318509045132	1.2885081227484771
GTC	Ara-2	rep1	V	0.9674127001978339	1.0270430029729813
GTC	Ara-2	rep2	V	1.006791785226093	1.0777065040113818
GTC	Ara-3	rep1	V	0.9856350967652447	1.025068062063985
GTC	Ara-3	rep2	V	1.035951783600398	1.1396308297687716
GTC	Ara-4	rep1	V	1.0220873476445043	1.1025208575291658
GTC	Ara-4	rep2	V	1.111604589984239	1.25129111825736
GTC	Ara-5	rep1	V	1.0272234871915578	1.1630172999170894
GTC	Ara-5	rep2	V	1.1251407902253818	1.2261546480487782
GTC	Ara-6	rep1	V	0.9818397371191423	1.0758119831697635
GTC	Ara-6	rep2	V	1.0468511263230067	1.136695264947255
GTC	Ara+1	rep1	V	1.0320265550080014	1.1280408659573664
GTC	Ara+1	rep2	V	1.0511111743175605	1.2104591878315165
GTC	Ara+2	rep1	V	0.9665592545261386	1.0416698471538857
GTC	Ara+2	rep2	V	1.0156534314925336	1.0693186965955999
GTC	Ara+3	rep1	V	1.054985108739587	1.143713880921772
GTC	Ara+3	rep2	V	1.0790037067179876	1.2099344057617945
GTC	Ara+4	rep1	V	1.0583683753616957	1.1784093085106866
GTC	Ara+4	rep2	V	1.0757729747618914	1.1900819982974198
GTC	Ara+5	rep1	V	1.024219437831318	1.1300347407752052
GTC	Ara+5	rep2	V	1.0573956521763213	1.163808729688374
GTC	REL606	rep1	V	1.008037402299727	1.1722943545172657
GTC	REL606	rep2	V	1.0491005152514947	1.177264763519177
GTC	REL607	rep1	V	1.0345479003163014	1.115133034579763
GTC	REL607	rep2	V	1.0605829782421856	1.159717017816193
GTG	Ara-1	rep1	V	0.9504696185002481	0.9579008503028281
GTG	Ara-1	rep2	V	0.9478504322874873	1.0372212616704573
GTG	Ara-2	rep1	V	0.8945043699944505	0.900221005027396
GTG	Ara-2	rep2	V	0.8953599572666543	0.9364226259908743
GTG	Ara-3	rep1	V	1.003816362469267	1.1256811623689686
GTG	Ara-3	rep2	V	0.9363834060703287	1.0133157831586481
GTG	Ara-4	rep1	V	0.938904285490043	0.9593897210424548
GTG	Ara-4	rep2	V	0.9252813056997086	1.0108117077303467
GTG	Ara-5	rep1	V	0.97974721001218	1.010597393703261
GTG	Ara-5	rep2	V	0.945306629394383	1.0045608089060825
GTG	Ara-6	rep1	V	0.945344820503533	0.999798618603745
GTG	Ara-6	rep2	V	0.9366479606982712	1.0206946607839535
GTG	Ara+1	rep1	V	0.9791030770586637	1.0091335881393566
GTG	Ara+1	rep2	V	0.9385444951908387	0.9848671210954564
GTG	Ara+2	rep1	V	0.933491325129512	0.9418360364591074
GTG	Ara+2	rep2	V	0.9260007491641479	0.9746312268874436
GTG	Ara+3	rep1	V	0.9946994400945508	1.0511205343179877
GTG	Ara+3	rep2	V	0.9251382627931295	0.9838142923708024
GTG	Ara+4	rep1	V	0.9772799524637199	1.0336673462899
GTG	Ara+4	rep2	V	0.9643315327575639	1.0256657102521496
GTG	Ara+5	rep1	V	0.9465163455546637	0.9922669088952126
GTG	Ara+5	rep2	V	0.9446616958597314	0.9755395098939746
GTG	REL606	rep1	V	0.9315067811727136	0.990454532235556
GTG	REL606	rep2	V	0.9481652894853071	1.0045312322434787
GTG	REL607	rep1	V	0.971433131238566	1.0453048060715704
GTG	REL607	rep2	V	0.9409594570755853	0.9981989505408752
GTT	Ara-1	rep1	V	0.9143750855374736	0.8624844820570757
GTT	Ara-1	rep2	V	0.9937226406273876	0.9195331757807282
GTT	Ara-2	rep1	V	0.8619175615505755	0.8030829209092673
GTT	Ara-2	rep2	V	0.8881988981379051	0.8174118422653107
GTT	Ara-3	rep1	V	0.8808875454095226	0.7903086394259858
GTT	Ara-3	rep2	V	0.8917864095120064	0.8456967817528598
GTT	Ara-4	rep1	V	0.8948195192983792	0.8163524404335631
GTT	Ara-4	rep2	V	0.944201710387698	0.8990797674956834
GTT	Ara-5	rep1	V	0.9137608831876898	0.888559169569697
GTT	Ara-5	rep2	V	0.9303593633446489	0.8741259128424841
GTT	Ara-6	rep1	V	0.85182421751701	0.7884689740384715
GTT	Ara-6	rep2	V	0.8748827200694099	0.8357801047521036
GTT	Ara+1	rep1	V	0.9036545137065873	0.8474581081822747
GTT	Ara+1	rep2	V	0.9843928385159019	0.931120849385632
GTT	Ara+2	rep1	V	0.8524617021077691	0.8104568138354958
GTT	Ara+2	rep2	V	0.8617556726045262	0.8197212359011239
GTT	Ara+3	rep1	V	0.940422102638031	0.8730360223541616
GTT	Ara+3	rep2	V	0.9642761490613838	0.8956585785792122
GTT	Ara+4	rep1	V	0.9200244560343566	0.882014186629571
GTT	Ara+4	rep2	V	0.94614132759707	0.9058022178664119
GTT	Ara+5	rep1	V	0.9048019857514746	0.8498509619549351
GTT	Ara+5	rep2	V	0.8965492710496229	0.8540549268500366
GTT	REL606	rep1	V	0.9271254213923159	0.8511533788897562
GTT	REL606	rep2	V	0.9392561698312204	0.8916587796319163
GTT	REL607	rep1	V	0.9209649429899305	0.8884561278073911
GTT	REL607	rep2	V	0.9457387363855421	0.8871878802681018
TAA	Ara-1	rep1	*	3.6235788063189434	7.905523283346418
TAA	Ara-1	rep2	*	3.4945871021290795	6.545459087055007
TAA	Ara-2	rep1	*	3.708039521432974	6.860768348551938
TAA	Ara-2	rep2	*	3.4325887179855883	6.132170299928279
TAA	Ara-3	rep1	*	3.164340032966383	5.684222379666361
TAA	Ara-3	rep2	*	2.841523532286427	4.286383117236419
TAA	Ara-4	rep1	*	3.7950805576691176	7.1044316339196
TAA	Ara-4	rep2	*	4.3316472010143245	7.209511979071454
TAA	Ara-5	rep1	*	3.884364549491997	8.007083311374295
TAA	Ara-5	rep2	*	4.010824059945543	7.009759665958076
TAA	Ara-6	rep1	*	3.7388500450860325	6.518046702992846
TAA	Ara-6	rep2	*	3.4079057537769137	5.089785995919373
TAA	Ara+1	rep1	*	3.7939783636812736	7.722085658916654
TAA	Ara+1	rep2	*	3.6940466611900997	7.218350502509331
TAA	Ara+2	rep1	*	4.253743535616743	8.707618675253816
TAA	Ara+2	rep2	*	4.340470475590203	7.849078585865307
TAA	Ara+3	rep1	*	4.009196557230901	8.325078802241842
TAA	Ara+3	rep2	*	4.700961120656237	8.4735835844296
TAA	Ara+4	rep1	*	4.714527473445899	9.309698168299967
TAA	Ara+4	rep2	*	3.940068777689826	7.402656021704535
TAA	Ara+5	rep1	*	3.7728366091136163	7.335805722578735
TAA	Ara+5	rep2	*	3.7749547504949215	6.801944218792366
TAA	REL606	rep1	*	4.704141076652396	9.790414960820465
TAA	REL606	rep2	*	4.34083190886333	7.513044119873296
TAA	REL607	rep1	*	4.349891382994064	8.431969524066904
TAA	REL607	rep2	*	5.051618072625543	10.387774885295661
TAC	Ara-1	rep1	Y	0.7611090992080074	0.5922153562654404
TAC	Ara-1	rep2	Y	0.7316625572514037	0.5300349920188107
TAC	Ara-2	rep1	Y	0.797904537568253	0.6426772798771846
TAC	Ara-2	rep2	Y	0.7486746848607818	0.5934220048929713
TAC	Ara-3	rep1	Y	0.7506996807998864	0.5529367510193289
TAC	Ara-3	rep2	Y	0.7023359773506882	0.5609086015128596
TAC	Ara-4	rep1	Y	0.7285859461222358	0.5509422530023893
TAC	Ara-4	rep2	Y	0.7103844096689712	0.5781048173363899
TAC	Ara-5	rep1	Y	0.7749359291581033	0.5990803562719159
TAC	Ara-5	rep2	Y	0.7671851053098622	0.5746093253197146
TAC	Ara-6	rep1	Y	0.7539240642586156	0.6056763156149214
TAC	Ara-6	rep2	Y	0.756836306145088	0.616326665921957
TAC	Ara+1	rep1	Y	0.7528112611957528	0.5798748654888547
TAC	Ara+1	rep2	Y	0.7796038760802824	0.5725872596982261
TAC	Ara+2	rep1	Y	0.7587692738221535	0.5986400411889554
TAC	Ara+2	rep2	Y	0.7077490027143861	0.570310942686238
TAC	Ara+3	rep1	Y	0.7196316443943194	0.527500400629159
TAC	Ara+3	rep2	Y	0.7175475940262285	0.5506065689178037
TAC	Ara+4	rep1	Y	0.7554846766152712	0.5841491783189489
TAC	Ara+4	rep2	Y	0.783856748721341	0.6249323576974365
TAC	Ara+5	rep1	Y	0.7440304966399989	0.5719127545740692
TAC	Ara+5	rep2	Y	0.7438123726606806	0.5931521766927969
TAC	REL606	rep1	Y	0.7650163780291825	0.5745677457637547
TAC	REL606	rep2	Y	0.7561287916669621	0.61552493310011
TAC	REL607	rep1	Y	0.7633979692860037	0.6028755607749875
TAC	REL607	rep2	Y	0.7716221080938137	0.623322841342324
TAG	Ara-1	rep1	*	7.963004818589585	32.9394732934814
TAG	Ara-1	rep2	*	7.4245542315042785	28.374726508977623
TAG	Ara-2	rep1	*	4.896803353012119	11.935852324211279
TAG	Ara-2	rep2	*	5.195589843148654	10.839828474658368
TAG	Ara-3	rep1	*	5.217715069996344	14.280542509394184
TAG	Ara-3	rep2	*	4.781225216102374	9.08784609802524
TAG	Ara-4	rep1	*	7.565491993435186	17.843516306695207
TAG	Ara-4	rep2	*	6.7321973883249955	14.72353989913689
TAG	Ara-5	rep1	*	5.3670308349581886	21.123051985195477
TAG	Ara-5	rep2	*	5.760746527893867	13.92368532062486
TAG	Ara-6	rep1	*	6.416585649084568	15.189926016614084
TAG	Ara-6	rep2	*	4.447727339912878	9.534141515378314
TAG	Ara+1	rep1	*	6.490942460042331	19.186923315558428
TAG	Ara+1	rep2	*	5.104840650796013	14.309860231932797
TAG	Ara+2	rep1	*	6.624580643756791	19.97732540725483
TAG	Ara+2	rep2	*	6.375896205889697	16.246141099391455
TAG	Ara+3	rep1	*	5.291147907915712	17.217422861361182
TAG	Ara+3	rep2	*	6.9690387098966236	16.728991070657788
TAG	Ara+4	rep1	*	7.71549587502913	21.188764049426005
TAG	Ara+4	rep2	*	5.9563119122920485	14.38656465621511
TAG	Ara+5	rep1	*	7.281517356253256	20.140905449820487
TAG	Ara+5	rep2	*	6.590054422419766	13.676399277554316
TAG	REL606	rep1	*	6.932218652673289	21.82440184401585
TAG	REL606	rep2	*	6.30181512716713	14.129122520946321
TAG	REL607	rep1	*	7.329397522584797	20.23739466258195
TAG	REL607	rep2	*	7.252060924393612	22.822080948322572
TAT	Ara-1	rep1	Y	0.839296814263131	0.67724455604342515
TAT	Ara-1	rep2	Y	0.7453752300563355	0.5656987862902326
TAT	Ara-2	rep1	Y	0.9295313271864736	0.8455211146401883
TAT	Ara-2	rep2	Y	0.8569702439334177	0.7031628816228749
TAT	Ara-3	rep1	Y	0.8293145412138241	0.5909733588667088
TAT	Ara-3	rep2	Y	0.7358390898080056	0.5998490950111179
TAT	Ara-4	rep1	Y	0.8023699553591738	0.6594707197562596
TAT	Ara-4	rep2	Y	0.7484114819061742	0.5722854099265194
TAT	Ara-5	rep1	Y	0.7943007231918405	0.5958781501152943
TAT	Ara-5	rep2	Y	0.759905214146285	0.5780039873207575
TAT	Ara-6	rep1	Y	0.797355463997023	0.6210009338689827
TAT	Ara-6	rep2	Y	0.7730997773786098	0.6240217938903235
TAT	Ara+1	rep1	Y	0.8143092645838345	0.667955864523526
TAT	Ara+1	rep2	Y	0.8079713190194086	0.6488659016386266
TAT	Ara+2	rep1	Y	0.80829439956605	0.6554617903204716
TAT	Ara+2	rep2	Y	0.7759887846143744	0.6293703192636093
TAT	Ara+3	rep1	Y	0.7750379576003211	0.6232577666722988
TAT	Ara+3	rep2	Y	0.7735727281097717	0.6307111538086588
TAT	Ara+4	rep1	Y	0.8682028388000451	0.6857026034526664
TAT	Ara+4	rep2	Y	0.9279815086824396	0.7509441438947163
TAT	Ara+5	rep1	Y	0.7942993528012104	0.6734868115140422
TAT	Ara+5	rep2	Y	0.7806681705882851	0.647974727962918
TAT	REL606	rep1	Y	0.8043211643731486	0.6582562940607344
TAT	REL606	rep2	Y	0.7997021312183151	0.6476547074435776
TAT	REL607	rep1	Y	0.8079416997650536	0.6416064159359006
TAT	REL607	rep2	Y	0.8070004721722046	0.6561582619983741
TCA	Ara-1	rep1	S	1.0368932661672126	0.8297856760802993
TCA	Ara-1	rep2	S	0.9324153306862696	0.7713143956588964
TCA	Ara-2	rep1	S	0.9624179527212112	0.8082553226032619
TCA	Ara-2	rep2	S	0.8845532821571002	0.6912048754034955
TCA	Ara-3	rep1	S	0.9923159249460096	0.7634498223134186
TCA	Ara-3	rep2	S	0.8795491578783676	0.6627156394330589
TCA	Ara-4	rep1	S	1.0826891988582827	0.8293292381974452
TCA	Ara-4	rep2	S	0.9694612211590299	0.749623428403624
TCA	Ara-5	rep1	S	1.0182845017076108	0.7628750496190674
TCA	Ara-5	rep2	S	0.9394845284206679	0.7476604464085662
TCA	Ara-6	rep1	S	1.0835794035591915	0.7778316122901855
TCA	Ara-6	rep2	S	0.9272898759530269	0.7341937530519294
TCA	Ara+1	rep1	S	0.8909701735932044	0.7287372268278628
TCA	Ara+1	rep2	S	1.0303055100899414	0.7769148336838437
TCA	Ara+2	rep1	S	1.0062953511390844	0.7594443048968545
TCA	Ara+2	rep2	S	0.9815959426487035	0.7628020177843259
TCA	Ara+3	rep1	S	1.1452496610341187	0.972514029247613
TCA	Ara+3	rep2	S	1.0104926335938913	0.7812574295822688
TCA	Ara+4	rep1	S	1.0243306075490528	0.8673025024872669
TCA	Ara+4	rep2	S	1.1045000113127317	0.9048441800681465
TCA	Ara+5	rep1	S	1.042487714910513	0.8235679787682615
TCA	Ara+5	rep2	S	1.0073300443344744	0.8066715555805747
TCA	REL606	rep1	S	1.126830080128385	0.8882163109631879
TCA	REL606	rep2	S	0.9833953188520461	0.760512697150423
TCA	REL607	rep1	S	1.0155666647531878	0.8781764940833918
TCA	REL607	rep2	S	1.0426191432260192	0.7856024085784142
TCC	Ara-1	rep1	S	0.8275466108659921	0.5523681537256728
TCC	Ara-1	rep2	S	0.867251496211202	0.632954475896532
TCC	Ara-2	rep1	S	0.7912408658117354	0.5652002991602592
TCC	Ara-2	rep2	S	0.8389455567941086	0.5933463931516757
TCC	Ara-3	rep1	S	0.7771042660855194	0.5310972191477111
TCC	Ara-3	rep2	S	0.8061868180173938	0.5621659380292922
TCC	Ara-4	rep1	S	0.8632666575898519	0.6274470196917088
TCC	Ara-4	rep2	S	0.9302301605179731	0.690840571925845
TCC	Ara-5	rep1	S	0.855789200910152	0.5887153001047671
TCC	Ara-5	rep2	S	0.8547621175596567	0.6399613285039104
TCC	Ara-6	rep1	S	0.8188683803738003	0.5747488201971954
TCC	Ara-6	rep2	S	0.8506083709802508	0.6233789400818006
TCC	Ara+1	rep1	S	0.8003957173095114	0.49373055313161857
TCC	Ara+1	rep2	S	0.8308302391056801	0.6062836396094764
TCC	Ara+2	rep1	S	0.7709507278383431	0.5415419380869085
TCC	Ara+2	rep2	S	0.8299445566767054	0.5847929266679306
TCC	Ara+3	rep1	S	0.8499025786047288	0.5802161791293389
TCC	Ara+3	rep2	S	0.9099439319689258	0.6839555697217764
TCC	Ara+4	rep1	S	0.8664024118879671	0.6477158252633433
TCC	Ara+4	rep2	S	0.8779174098904692	0.6833929550496743
TCC	Ara+5	rep1	S	0.7952271086135564	0.5784065265470735
TCC	Ara+5	rep2	S	0.7794401272396781	0.5644281476801019
TCC	REL606	rep1	S	0.8720721422589576	0.6690676637396268
TCC	REL606	rep2	S	0.8785909634251156	0.6605479202700705
TCC	REL607	rep1	S	0.8740411883334831	0.6483098419577882
TCC	REL607	rep2	S	0.9015779872418866	0.6767709036187277
TCG	Ara-1	rep1	S	0.9794892623056685	1.0711749700183764
TCG	Ara-1	rep2	S	1.016030919475139	1.174797546408833
TCG	Ara-2	rep1	S	0.9468631782587514	1.0341948554882714
TCG	Ara-2	rep2	S	0.9743029589441408	1.1331420152004563
TCG	Ara-3	rep1	S	0.939866116420774	0.9956242911867187
TCG	Ara-3	rep2	S	0.9701642513304327	1.0713631360254123
TCG	Ara-4	rep1	S	1.0556466848269672	1.1181545111027937
TCG	Ara-4	rep2	S	1.1550497899179015	1.3708408778195706
TCG	Ara-5	rep1	S	1.0409206996908646	1.2091657351242107
TCG	Ara-5	rep2	S	1.1017331056392539	1.2919336931940941
TCG	Ara-6	rep1	S	1.007049209354521	1.0542879747857867
TCG	Ara-6	rep2	S	1.0592241097766	1.2307218787822223
TCG	Ara+1	rep1	S	0.9820515749944501	1.122652855991751
TCG	Ara+1	rep2	S	1.0624041515552176	1.247538704154393
TCG	Ara+2	rep1	S	0.9867507798525701	1.06442696778409
TCG	Ara+2	rep2	S	1.048521200712627	1.1603580721989823
TCG	Ara+3	rep1	S	1.04643608552732	1.1414906724419236
TCG	Ara+3	rep2	S	1.117020031112115	1.332442585664207
TCG	Ara+4	rep1	S	1.088679853672684	1.2056326521400624
TCG	Ara+4	rep2	S	1.1128524772338055	1.2289833713437504
TCG	Ara+5	rep1	S	1.0506737610812737	1.1787484542538893
TCG	Ara+5	rep2	S	1.1101308888376649	1.280924114498895
TCG	REL606	rep1	S	1.0425414868037486	1.1491621807017505
TCG	REL606	rep2	S	1.0577423813577078	1.2612512067386739
TCG	REL607	rep1	S	1.0664612979989403	1.219344953743547
TCG	REL607	rep2	S	1.0762746408348252	1.2371475246018568
TCT	Ara-1	rep1	S	1.227739029587609	1.0656067957051403
TCT	Ara-1	rep2	S	1.1559195623383112	1.0685240834836878
TCT	Ara-2	rep1	S	1.0860361514828891	0.9170487207673634
TCT	Ara-2	rep2	S	0.9616199269279576	0.8257388990088563
TCT	Ara-3	rep1	S	1.1183586436927226	0.8602564937700574
TCT	Ara-3	rep2	S	0.9179819440287117	0.7468404968629512
TCT	Ara-4	rep1	S	0.9980104445701633	0.8190221413506893
TCT	Ara-4	rep2	S	0.9762490210219628	0.7969729050096804
TCT	Ara-5	rep1	S	1.1517320729194842	1.008447661046772
TCT	Ara-5	rep2	S	1.053158567918461	0.9463420505887122
TCT	Ara-6	rep1	S	1.032705763964108	0.8740301685579931
TCT	Ara-6	rep2	S	1.0005441975198572	0.8625910087558748
TCT	Ara+1	rep1	S	1.0955453621105482	0.9398964815673557
TCT	Ara+1	rep2	S	1.0914339129407429	0.9571288876058603
TCT	Ara+2	rep1	S	1.1162909587384313	0.9169445690461565
TCT	Ara+2	rep2	S	1.026917124120947	0.8886661704402392
TCT	Ara+3	rep1	S	1.0968318473147813	0.9260600389917018
TCT	Ara+3	rep2	S	1.0233017410980612	0.9099443649967266
TCT	Ara+4	rep1	S	1.0504954013899432	0.8978271278588876
TCT	Ara+4	rep2	S	1.0019477696669272	0.8599477473563335
TCT	Ara+5	rep1	S	1.1624493241116851	1.0883506784439554
TCT	Ara+5	rep2	S	1.0568864163153313	0.9801583471693109
TCT	REL606	rep1	S	1.199669546115692	1.0570962172583933
TCT	REL606	rep2	S	1.0633032992952516	0.9611782342023506
TCT	REL607	rep1	S	1.1476818106331022	1.067224326426955
TCT	REL607	rep2	S	1.1202294774499992	0.9994208123830116
TGA	Ara-1	rep1	*	3.736010320689273	9.047890899145804
TGA	Ara-1	rep2	*	3.122475877896069	8.693274697347846
TGA	Ara-2	rep1	*	4.000811963079097	8.985540598251319
TGA	Ara-2	rep2	*	3.844889940683584	8.651656088987338
TGA	Ara-3	rep1	*	4.030085419991279	9.83920317779369
TGA	Ara-3	rep2	*	3.652126711320336	6.2382854413704
TGA	Ara-4	rep1	*	4.060510255212835	9.016482774769642
TGA	Ara-4	rep2	*	4.730571323347413	9.158989171304485
TGA	Ara-5	rep1	*	4.1780454442995545	9.914150794576498
TGA	Ara-5	rep2	*	3.9661134217261775	8.60223347094355
TGA	Ara-6	rep1	*	4.0972596256236375	8.843434156778988
TGA	Ara-6	rep2	*	3.7019777151268545	6.989932692442598
TGA	Ara+1	rep1	*	4.11924014005547	10.148725314738128
TGA	Ara+1	rep2	*	3.555325616711196	9.170951399690482
TGA	Ara+2	rep1	*	4.178854490228391	11.07105036816676
TGA	Ara+2	rep2	*	4.6198636401845254	10.571065169473014
TGA	Ara+3	rep1	*	4.471989287917479	12.132862016790503
TGA	Ara+3	rep2	*	5.196267643106613	11.268922944093877
TGA	Ara+4	rep1	*	4.937287259280753	11.561774622522009
TGA	Ara+4	rep2	*	4.052670244518798	8.53715220615322
TGA	Ara+5	rep1	*	3.9152930559580614	9.748475244263759
TGA	Ara+5	rep2	*	4.181144658405549	8.770265002962825
TGA	REL606	rep1	*	4.988806541300542	13.638932180196196
TGA	REL606	rep2	*	4.345120385224771	9.298325840731898
TGA	REL607	rep1	*	4.6805534370273545	10.977340380171254
TGA	REL607	rep2	*	5.056011902441779	13.305597983998224
TGC	Ara-1	rep1	C	0.8839390619094073	0.739052131174789
TGC	Ara-1	rep2	C	0.9351378903713757	0.8171748998923483
TGC	Ara-2	rep1	C	0.8077548518215311	0.6294902917126407
TGC	Ara-2	rep2	C	0.8432485636710683	0.698090784040561
TGC	Ara-3	rep1	C	0.8786139764060836	0.6385170919746552
TGC	Ara-3	rep2	C	0.7835663385739099	0.6442235740436326
TGC	Ara-4	rep1	C	0.8509835072893174	0.7461692881546739
TGC	Ara-4	rep2	C	0.85620612562757	0.7929106870410246
TGC	Ara-5	rep1	C	0.8237340693377038	0.6950692426888055
TGC	Ara-5	rep2	C	0.854696274874143	0.7915614821259659
TGC	Ara-6	rep1	C	0.8471326899949577	0.7188428028865306
TGC	Ara-6	rep2	C	0.898316057470582	0.8456188637843097
TGC	Ara+1	rep1	C	0.8880496317014497	0.776271756878111
TGC	Ara+1	rep2	C	0.9091030245955398	0.7720034165991702
TGC	Ara+2	rep1	C	0.8181483588649118	0.6672018878278073
TGC	Ara+2	rep2	C	0.8218496330747717	0.710159748621589
TGC	Ara+3	rep1	C	0.8498642167248441	0.7490770670677407
TGC	Ara+3	rep2	C	0.8631568536312629	0.758452835763434
TGC	Ara+4	rep1	C	0.8721869216964587	0.8180873460606461
TGC	Ara+4	rep2	C	0.9160158349476578	0.8831727623663792
TGC	Ara+5	rep1	C	0.89322062108828	0.7262917465972103
TGC	Ara+5	rep2	C	0.9046992924508105	0.84278940273477
TGC	REL606	rep1	C	0.8852601967886126	0.7711631777100857
TGC	REL606	rep2	C	0.9079135742236054	0.8056372642023757
TGC	REL607	rep1	C	0.9099077265449452	0.7587790742061301
TGC	REL607	rep2	C	0.9137187678347471	0.823711759898403
TGG	Ara-1	rep1	W	0.9130997127204852	1.0045494842850549
TGG	Ara-1	rep2	W	0.8884469245804841	1.07501840480524
TGG	Ara-2	rep1	W	0.9271066097348034	1.011220796908801
TGG	Ara-2	rep2	W	0.9671994465662914	1.1356778527359042
TGG	Ara-3	rep1	W	0.8371587892720569	0.9410492184868681
TGG	Ara-3	rep2	W	0.963664266171086	1.095207091448408
TGG	Ara-4	rep1	W	0.881064774871642	0.9524490436609752
TGG	Ara-4	rep2	W	0.9251578015203976	1.0307798193200026
TGG	Ara-5	rep1	W	0.9137901442268734	1.0643648596731752
TGG	Ara-5	rep2	W	0.989833751246859	1.171508575821533
TGG	Ara-6	rep1	W	0.8916254855711755	0.9909899475401216
TGG	Ara-6	rep2	W	0.9718463304108048	1.1265412084768718
TGG	Ara+1	rep1	W	0.8600272273184834	0.9785169864422253
TGG	Ara+1	rep2	W	0.9295048296176596	1.056000544519321
TGG	Ara+2	rep1	W	0.8989358068304337	0.9819148426240328
TGG	Ara+2	rep2	W	0.9024498934835076	1.012103458762488
TGG	Ara+3	rep1	W	0.9412940383593729	1.0145926906330782
TGG	Ara+3	rep2	W	0.9060115865151454	1.0532380963595303
TGG	Ara+4	rep1	W	0.8925255310005612	0.9736163656006103
TGG	Ara+4	rep2	W	0.9336496746778471	1.0387328367273363
TGG	Ara+5	rep1	W	1.0040688240586566	1.1318124571487038
TGG	Ara+5	rep2	W	0.9718406398770199	1.114184458150051
TGG	REL606	rep1	W	0.9566185356237263	1.1288109552032577
TGG	REL606	rep2	W	0.9684910479914761	1.1118972216123713
TGG	REL607	rep1	W	0.9342138293170961	1.0327275611804605
TGG	REL607	rep2	W	0.9405838983876502	1.097971796472505
TGT	Ara-1	rep1	C	1.0675272783180663	1.2175776725665712
TGT	Ara-1	rep2	C	1.0288307240285548	1.0607822040989439
TGT	Ara-2	rep1	C	0.996440673108705	0.9405893441530843
TGT	Ara-2	rep2	C	0.9364638750418738	0.9308362482467242
TGT	Ara-3	rep1	C	0.8357271041867386	0.8158465593058982
TGT	Ara-3	rep2	C	0.837941127744113	0.8550618354007679
TGT	Ara-4	rep1	C	0.9103014660954907	0.8581131154373451
TGT	Ara-4	rep2	C	0.8647618544218939	0.8177265777893562
TGT	Ara-5	rep1	C	1.105877490164229	1.1726214292437498
TGT	Ara-5	rep2	C	0.9968230296643367	1.0500351958732383
TGT	Ara-6	rep1	C	0.9193115476083289	0.9185913828721333
TGT	Ara-6	rep2	C	0.9754599242538715	0.9683554706068275
TGT	Ara+1	rep1	C	1.0208710879134757	1.1981288364068623
TGT	Ara+1	rep2	C	0.9450094611215389	1.1468177775754558
TGT	Ara+2	rep1	C	0.923700545268272	0.9240741816421879
TGT	Ara+2	rep2	C	0.9349453775634466	0.8997109598214734
TGT	Ara+3	rep1	C	1.0384830119550728	1.0410037108561008
TGT	Ara+3	rep2	C	0.9558080645659305	0.9651974250292614
TGT	Ara+4	rep1	C	0.9579936300216612	0.9493596527356044
TGT	Ara+4	rep2	C	1.011440278830391	0.9939222637185593
TGT	Ara+5	rep1	C	1.0327060791706488	1.0498497292131184
TGT	Ara+5	rep2	C	1.0486838134493637	1.1202195213339317
TGT	REL606	rep1	C	1.023375708383576	1.087464370943942
TGT	REL606	rep2	C	0.9897490352339675	1.0180531051180106
TGT	REL607	rep1	C	0.9833208681133575	1.010606899017328
TGT	REL607	rep2	C	1.0229649619604568	1.0265847898489144
TTA	Ara-1	rep1	L	0.9169426998327321	0.8375886280883474
TTA	Ara-1	rep2	L	0.7589760569456715	0.5843682911767821
TTA	Ara-2	rep1	L	0.8942705313347225	0.8072651700939543
TTA	Ara-2	rep2	L	0.8568469319304002	0.7723231045040468
TTA	Ara-3	rep1	L	0.8818532592275335	0.7631300388462987
TTA	Ara-3	rep2	L	0.8827987136803124	0.752500677313532
TTA	Ara-4	rep1	L	0.9119404087887725	0.8096752711137783
TTA	Ara-4	rep2	L	0.8328506559747471	0.7504042431716315
TTA	Ara-5	rep1	L	0.9089624719467988	0.8000052337179169
TTA	Ara-5	rep2	L	0.8747799119124758	0.725064919118185
TTA	Ara-6	rep1	L	0.9228207111755248	0.8071681452441662
TTA	Ara-6	rep2	L	0.8697885780870122	0.7668612581298915
TTA	Ara+1	rep1	L	0.9653944336121048	0.8789866435235355
TTA	Ara+1	rep2	L	0.9539692413161247	0.8988256983308547
TTA	Ara+2	rep1	L	0.8877243549675987	0.7986312225983795
TTA	Ara+2	rep2	L	0.9230385870035428	0.8499756983874331
TTA	Ara+3	rep1	L	0.834326285594007	0.7570370134372306
TTA	Ara+3	rep2	L	0.9174823631680451	0.7964964834917899
TTA	Ara+4	rep1	L	0.905696212418995	0.8313013509771097
TTA	Ara+4	rep2	L	0.9263445876171638	0.803309521203786
TTA	Ara+5	rep1	L	0.9267327528892656	0.8994973387713822
TTA	Ara+5	rep2	L	0.9372168734176664	0.8269806907348591
TTA	REL606	rep1	L	0.9007627094385344	0.7956097175004946
TTA	REL606	rep2	L	0.8720865142794021	0.746265120536515
TTA	REL607	rep1	L	0.9871462814368621	0.8665700821103275
TTA	REL607	rep2	L	0.9121395084287762	0.8362421474157105
TTC	Ara-1	rep1	F	0.8690130528483564	0.6690274067337417
TTC	Ara-1	rep2	F	0.8964296970046944	0.6731178682256156
TTC	Ara-2	rep1	F	0.9180827396898313	0.7348720566090273
TTC	Ara-2	rep2	F	0.8873802256694455	0.6727939188581318
TTC	Ara-3	rep1	F	0.8248083153355406	0.6307336656311766
TTC	Ara-3	rep2	F	0.8084282554702272	0.6279972470950879
TTC	Ara-4	rep1	F	0.8188595914803306	0.616154494399138
TTC	Ara-4	rep2	F	0.8157301400355006	0.6328946123857889
TTC	Ara-5	rep1	F	0.9277609294340634	0.7708831574343733
TTC	Ara-5	rep2	F	0.907041932766284	0.7279093921808958
TTC	Ara-6	rep1	F	0.7933560426421369	0.5823180515684833
TTC	Ara-6	rep2	F	0.7963007318773065	0.6259369847469791
TTC	Ara+1	rep1	F	0.8730557829561234	0.6667135807835797
TTC	Ara+1	rep2	F	0.9127027291919217	0.6993140172343713
TTC	Ara+2	rep1	F	0.8094539533891969	0.6185328109210692
TTC	Ara+2	rep2	F	0.7813177076145952	0.5855610979225861
TTC	Ara+3	rep1	F	0.8756488113120257	0.6271983684936806
TTC	Ara+3	rep2	F	0.8335457156738123	0.6344285057428468
TTC	Ara+4	rep1	F	0.9981847879006096	0.8575240094874835
TTC	Ara+4	rep2	F	0.9861111933479313	0.8473149327020496
TTC	Ara+5	rep1	F	0.8557874475791751	0.6408145654722073
TTC	Ara+5	rep2	F	0.8115712123382824	0.6144407630211193
TTC	REL606	rep1	F	0.9125078762360591	0.7281797317416997
TTC	REL606	rep2	F	0.9238363019275974	0.7636029264823425
TTC	REL607	rep1	F	0.8688879976290897	0.6817038460686541
TTC	REL607	rep2	F	0.8832042498491977	0.684232441911302
TTG	Ara-1	rep1	L	0.9354839650701824	0.861925666509019
TTG	Ara-1	rep2	L	0.9455053690082831	0.9044623201280134
TTG	Ara-2	rep1	L	0.9481900154974585	0.9282393422984873
TTG	Ara-2	rep2	L	0.963140183447254	0.9541545387896824
TTG	Ara-3	rep1	L	0.9145404589601996	0.8650052053080125
TTG	Ara-3	rep2	L	0.9180798957428989	0.899243023547252
TTG	Ara-4	rep1	L	0.964853605894366	0.9184449029563703
TTG	Ara-4	rep2	L	0.9218424473346979	0.9032868978875663
TTG	Ara-5	rep1	L	0.8947805085701835	0.8253407530537338
TTG	Ara-5	rep2	L	0.9233209374164361	0.8769371706523902
TTG	Ara-6	rep1	L	0.9445567326635556	0.9108509735098654
TTG	Ara-6	rep2	L	0.970425714691392	0.953045046159132
TTG	Ara+1	rep1	L	0.9050430149853059	0.8789688001708784
TTG	Ara+1	rep2	L	0.9828037439200384	0.9739468043972138
TTG	Ara+2	rep1	L	0.899821565153786	0.8622147097355637
TTG	Ara+2	rep2	L	0.9159207878396536	0.891079315330189
TTG	Ara+3	rep1	L	0.8844618410370404	0.8765029442199356
TTG	Ara+3	rep2	L	0.8825600348161273	0.8762303098411556
TTG	Ara+4	rep1	L	0.9290038716860336	0.8824705692785284
TTG	Ara+4	rep2	L	0.9267434647693579	0.8694005189269167
TTG	Ara+5	rep1	L	0.944750024765869	0.929734002308287
TTG	Ara+5	rep2	L	0.9815695454048524	0.9584604447928047
TTG	REL606	rep1	L	0.9186041778388727	0.8571743034158527
TTG	REL606	rep2	L	0.9775143120785257	0.9302067738848593
TTG	REL607	rep1	L	0.9316493035602867	0.8827790726779545
TTG	REL607	rep2	L	0.90370030067703	0.8737934874240356
TTT	Ara-1	rep1	F	0.776930131928056	0.5645319844261912
TTT	Ara-1	rep2	F	0.8353447525571371	0.6037299193021712
TTT	Ara-2	rep1	F	0.8379496163515234	0.6725532316207342
TTT	Ara-2	rep2	F	0.7887838663662089	0.5868632816815137
TTT	Ara-3	rep1	F	0.770687593232183	0.5278809030292558
TTT	Ara-3	rep2	F	0.7601166919656864	0.5483367760853542
TTT	Ara-4	rep1	F	0.7275661671104644	0.527512797145708
TTT	Ara-4	rep2	F	0.7128816683195315	0.5304049766764164
TTT	Ara-5	rep1	F	0.8131948548494853	0.6121793313508888
TTT	Ara-5	rep2	F	0.7914357400532633	0.5695139105310127
TTT	Ara-6	rep1	F	0.7505385602404665	0.5425106964301946
TTT	Ara-6	rep2	F	0.7507778244403079	0.5384673586891653
TTT	Ara+1	rep1	F	0.7709530623002925	0.5863982449534721
TTT	Ara+1	rep2	F	0.7905528087823693	0.614240002116387
TTT	Ara+2	rep1	F	0.7405588702271213	0.5075832943970586
TTT	Ara+2	rep2	F	0.7514191863788788	0.5511586811234047
TTT	Ara+3	rep1	F	0.710829041295084	0.49830736536187303
TTT	Ara+3	rep2	F	0.7343436395795011	0.5143176134840703
TTT	Ara+4	rep1	F	0.8425033345988534	0.6654802196377103
TTT	Ara+4	rep2	F	0.8643671128088213	0.7088253410558029
TTT	Ara+5	rep1	F	0.7211750941361412	0.5128931301201699
TTT	Ara+5	rep2	F	0.763344059157337	0.5461545052482529
TTT	REL606	rep1	F	0.7426113556247543	0.5463839635462134
TTT	REL606	rep2	F	0.7992667975733927	0.6128171852470065
TTT	REL607	rep1	F	0.7729019131358151	0.5696487946720896
TTT	REL607	rep2	F	0.7461414321776293	0.5367538210705566
