# Supplementary material for: The landscape of transcriptional and translational changes over 22 years of bacterial adaptation
Source: eLife. 2022 Oct 10;11:e81979. doi: 10.7554/eLife.81979 (PMC9645810; doi:10.7554/eLife.81979)
Supplement: Supplementary file 11. — Generated from ‘manual_pps.Rmd’ (https://github.com/shahlab/LTEE_gene_expression_2/tree/main/code/analysis). [file elife-81979-supp11.csv]

seqtype	line	pathway	pps	common_name
rna	Ara+2	PWY-5340	11.979882122056646	sulfate activation for sulfonation
ribo	Ara-1	DTDPRHAMSYN-PWY	10	dTDP-L-rhamnose biosynthesis I
ribo	Ara-1	GLUTAMINDEG-PWY	10	glutamine degradation I
ribo	Ara-1	GLUTAMINEFUM-PWY	10	glutamine degradation II
ribo	Ara-1	GLUTSYN-PWY	10	glutamate biosynthesis I
ribo	Ara-1	GLUTSYNIII-PWY	10	glutamate biosynthesis III
ribo	Ara-1	PWYCQD-2	10	dTDP-<i>N</i>-acetylviosamine biosynthesis
ribo	Ara-1	RIBOKIN-PWY	10	ribose degradation
ribo	Ara-2	DTDPRHAMSYN-PWY	10	dTDP-L-rhamnose biosynthesis I
ribo	Ara-2	GALACTITOLCAT-PWY	10	galactitol degradation
ribo	Ara-2	PWY-5901	10	2,3-dihydroxybenzoate biosynthesis
ribo	Ara-2	PWY0-1347	10	NADH to trimethylamine <i>N</i>-oxide electron transfer
ribo	Ara-2	PWY0-1355	10	formate to trimethylamine <i>N</i>-oxide electron transfer
ribo	Ara-2	PWYCQD-2	10	dTDP-<i>N</i>-acetylviosamine biosynthesis
ribo	Ara-2	PWYCQD-4	10	galactosamine degradation
ribo	Ara-2	RIBOKIN-PWY	10	ribose degradation
ribo	Ara-3	2PHENDEG-PWY	10	phenylethylamine degradation I
ribo	Ara-3	DTDPRHAMSYN-PWY	10	dTDP-L-rhamnose biosynthesis I
ribo	Ara-3	PWY-5901	10	2,3-dihydroxybenzoate biosynthesis
ribo	Ara-3	PWY-6476	10	cytidylyl molybdenum cofactor biosynthesis
ribo	Ara-3	PWY-6617	10	adenosine nucleotides degradation III
ribo	Ara-3	PWY0-1299	10	arginine dependent acid resistance
ribo	Ara-3	PWY0-1301	10	melibiose degradation
ribo	Ara-3	PWY0-1306	10	L-galactonate degradation
ribo	Ara-3	PWY0-1348	10	NADH to dimethyl sulfoxide electron transfer
ribo	Ara-3	PWY0-1356	10	formate to dimethyl sulfoxide electron transfer
ribo	Ara-3	PWY0-541	10	cyclopropane fatty acid (CFA) biosynthesis
ribo	Ara-3	PWYCQD-2	10	dTDP-<i>N</i>-acetylviosamine biosynthesis
ribo	Ara-3	RIBOKIN-PWY	10	ribose degradation
ribo	Ara-3	SERDEG-PWY	10	L-serine degradation
ribo	Ara-3	TREDEGLOW-PWY	10	trehalose degradation I (low osmolarity)
ribo	Ara-4	DTDPRHAMSYN-PWY	10	dTDP-L-rhamnose biosynthesis I
ribo	Ara-4	GLYOXDEG-PWY	10	glycolate and glyoxylate degradation II
ribo	Ara-4	PWY-5901	10	2,3-dihydroxybenzoate biosynthesis
ribo	Ara-4	PWY0-1347	10	NADH to trimethylamine <i>N</i>-oxide electron transfer
ribo	Ara-4	PWY0-1355	10	formate to trimethylamine <i>N</i>-oxide electron transfer
ribo	Ara-4	PWY0-541	10	cyclopropane fatty acid (CFA) biosynthesis
ribo	Ara-4	PWYCQD-2	10	dTDP-<i>N</i>-acetylviosamine biosynthesis
ribo	Ara-4	RIBOKIN-PWY	10	ribose degradation
ribo	Ara-5	DTDPRHAMSYN-PWY	10	dTDP-L-rhamnose biosynthesis I
ribo	Ara-5	PWY0-1465	10	D-malate degradation
ribo	Ara-5	PWYCQD-2	10	dTDP-<i>N</i>-acetylviosamine biosynthesis
ribo	Ara-5	RIBOKIN-PWY	10	ribose degradation
ribo	Ara-6	DTDPRHAMSYN-PWY	10	dTDP-L-rhamnose biosynthesis I
ribo	Ara-6	GLUTAMINDEG-PWY	10	glutamine degradation I
ribo	Ara-6	GLUTAMINEFUM-PWY	10	glutamine degradation II
ribo	Ara-6	GLUTSYN-PWY	10	glutamate biosynthesis I
ribo	Ara-6	GLUTSYNIII-PWY	10	glutamate biosynthesis III
ribo	Ara-6	PWYCQD-2	10	dTDP-<i>N</i>-acetylviosamine biosynthesis
ribo	Ara-6	RIBOKIN-PWY	10	ribose degradation
ribo	Ara+1	BGALACT-PWY	10	lactose degradation III
ribo	Ara+1	DTDPRHAMSYN-PWY	10	dTDP-L-rhamnose biosynthesis I
ribo	Ara+1	PWY0-1299	10	arginine dependent acid resistance
ribo	Ara+1	PWY0-1301	10	melibiose degradation
ribo	Ara+1	PWY0-44	10	D-allose degradation
ribo	Ara+1	PWY3O-4106	10	NAD salvage pathway III
ribo	Ara+1	PWYCQD-2	10	dTDP-<i>N</i>-acetylviosamine biosynthesis
ribo	Ara+1	RIBOKIN-PWY	10	ribose degradation
ribo	Ara+2	DTDPRHAMSYN-PWY	10	dTDP-L-rhamnose biosynthesis I
ribo	Ara+2	PWY0-1347	10	NADH to trimethylamine <i>N</i>-oxide electron transfer
ribo	Ara+2	PWY0-1355	10	formate to trimethylamine <i>N</i>-oxide electron transfer
ribo	Ara+2	PWYCQD-2	10	dTDP-<i>N</i>-acetylviosamine biosynthesis
ribo	Ara+3	DTDPRHAMSYN-PWY	10	dTDP-L-rhamnose biosynthesis I
ribo	Ara+3	ETOH-ACETYLCOA-ANA-PWY	10	ethanol degradation I
ribo	Ara+3	PWY-5480	10	pyruvate fermentation to ethanol I
ribo	Ara+3	PWY-6028	10	acetoin degradation
ribo	Ara+3	PWY-6617	10	adenosine nucleotides degradation III
ribo	Ara+3	PWY0-1347	10	NADH to trimethylamine <i>N</i>-oxide electron transfer
ribo	Ara+3	PWY0-1355	10	formate to trimethylamine <i>N</i>-oxide electron transfer
ribo	Ara+3	PWYCQD-2	10	dTDP-<i>N</i>-acetylviosamine biosynthesis
ribo	Ara+3	RIBOKIN-PWY	10	ribose degradation
ribo	Ara+3	SERDEG-PWY	10	L-serine degradation
ribo	Ara+4	DTDPRHAMSYN-PWY	10	dTDP-L-rhamnose biosynthesis I
ribo	Ara+4	PWYCQD-2	10	dTDP-<i>N</i>-acetylviosamine biosynthesis
ribo	Ara+5	GLYOXDEG-PWY	10	glycolate and glyoxylate degradation II
ribo	Ara+5	PWY-4121	10	glutathionylspermidine biosynthesis
rna	Ara-1	DTDPRHAMSYN-PWY	10	dTDP-L-rhamnose biosynthesis I
rna	Ara-1	GLUTAMINDEG-PWY	10	glutamine degradation I
rna	Ara-1	GLUTAMINEFUM-PWY	10	glutamine degradation II
rna	Ara-1	GLUTSYN-PWY	10	glutamate biosynthesis I
rna	Ara-1	GLUTSYNIII-PWY	10	glutamate biosynthesis III
rna	Ara-1	PWYCQD-2	10	dTDP-<i>N</i>-acetylviosamine biosynthesis
rna	Ara-1	RIBOKIN-PWY	10	ribose degradation
rna	Ara-2	DTDPRHAMSYN-PWY	10	dTDP-L-rhamnose biosynthesis I
rna	Ara-2	GALACTITOLCAT-PWY	10	galactitol degradation
rna	Ara-2	PWY-5901	10	2,3-dihydroxybenzoate biosynthesis
rna	Ara-2	PWY0-1347	10	NADH to trimethylamine <i>N</i>-oxide electron transfer
rna	Ara-2	PWY0-1355	10	formate to trimethylamine <i>N</i>-oxide electron transfer
rna	Ara-2	PWYCQD-2	10	dTDP-<i>N</i>-acetylviosamine biosynthesis
rna	Ara-2	PWYCQD-4	10	galactosamine degradation
rna	Ara-2	RIBOKIN-PWY	10	ribose degradation
rna	Ara-3	2PHENDEG-PWY	10	phenylethylamine degradation I
rna	Ara-3	DTDPRHAMSYN-PWY	10	dTDP-L-rhamnose biosynthesis I
rna	Ara-3	PWY-5901	10	2,3-dihydroxybenzoate biosynthesis
rna	Ara-3	PWY-6476	10	cytidylyl molybdenum cofactor biosynthesis
rna	Ara-3	PWY-6617	10	adenosine nucleotides degradation III
rna	Ara-3	PWY0-1299	10	arginine dependent acid resistance
rna	Ara-3	PWY0-1301	10	melibiose degradation
rna	Ara-3	PWY0-1306	10	L-galactonate degradation
rna	Ara-3	PWY0-1348	10	NADH to dimethyl sulfoxide electron transfer
rna	Ara-3	PWY0-1356	10	formate to dimethyl sulfoxide electron transfer
rna	Ara-3	PWY0-541	10	cyclopropane fatty acid (CFA) biosynthesis
rna	Ara-3	PWYCQD-2	10	dTDP-<i>N</i>-acetylviosamine biosynthesis
rna	Ara-3	RIBOKIN-PWY	10	ribose degradation
rna	Ara-3	SERDEG-PWY	10	L-serine degradation
rna	Ara-3	TREDEGLOW-PWY	10	trehalose degradation I (low osmolarity)
rna	Ara-4	DTDPRHAMSYN-PWY	10	dTDP-L-rhamnose biosynthesis I
rna	Ara-4	GLYOXDEG-PWY	10	glycolate and glyoxylate degradation II
rna	Ara-4	PWY-5901	10	2,3-dihydroxybenzoate biosynthesis
rna	Ara-4	PWY0-1347	10	NADH to trimethylamine <i>N</i>-oxide electron transfer
rna	Ara-4	PWY0-1355	10	formate to trimethylamine <i>N</i>-oxide electron transfer
rna	Ara-4	PWY0-541	10	cyclopropane fatty acid (CFA) biosynthesis
rna	Ara-4	PWYCQD-2	10	dTDP-<i>N</i>-acetylviosamine biosynthesis
rna	Ara-4	RIBOKIN-PWY	10	ribose degradation
rna	Ara-5	DTDPRHAMSYN-PWY	10	dTDP-L-rhamnose biosynthesis I
rna	Ara-5	PWY0-1465	10	D-malate degradation
rna	Ara-5	PWYCQD-2	10	dTDP-<i>N</i>-acetylviosamine biosynthesis
rna	Ara-5	RIBOKIN-PWY	10	ribose degradation
rna	Ara-6	DTDPRHAMSYN-PWY	10	dTDP-L-rhamnose biosynthesis I
rna	Ara-6	GLUTAMINDEG-PWY	10	glutamine degradation I
rna	Ara-6	GLUTAMINEFUM-PWY	10	glutamine degradation II
rna	Ara-6	GLUTSYN-PWY	10	glutamate biosynthesis I
rna	Ara-6	GLUTSYNIII-PWY	10	glutamate biosynthesis III
rna	Ara-6	PWYCQD-2	10	dTDP-<i>N</i>-acetylviosamine biosynthesis
rna	Ara-6	RIBOKIN-PWY	10	ribose degradation
rna	Ara+1	BGALACT-PWY	10	lactose degradation III
rna	Ara+1	DTDPRHAMSYN-PWY	10	dTDP-L-rhamnose biosynthesis I
rna	Ara+1	PWY0-1299	10	arginine dependent acid resistance
rna	Ara+1	PWY0-1301	10	melibiose degradation
rna	Ara+1	PWY0-44	10	D-allose degradation
rna	Ara+1	PWY3O-4106	10	NAD salvage pathway III
rna	Ara+1	PWYCQD-2	10	dTDP-<i>N</i>-acetylviosamine biosynthesis
rna	Ara+1	RIBOKIN-PWY	10	ribose degradation
rna	Ara+2	DTDPRHAMSYN-PWY	10	dTDP-L-rhamnose biosynthesis I
rna	Ara+2	PWY0-1347	10	NADH to trimethylamine <i>N</i>-oxide electron transfer
rna	Ara+2	PWY0-1355	10	formate to trimethylamine <i>N</i>-oxide electron transfer
rna	Ara+2	PWYCQD-2	10	dTDP-<i>N</i>-acetylviosamine biosynthesis
rna	Ara+3	DTDPRHAMSYN-PWY	10	dTDP-L-rhamnose biosynthesis I
rna	Ara+3	ETOH-ACETYLCOA-ANA-PWY	10	ethanol degradation I
rna	Ara+3	PWY-5480	10	pyruvate fermentation to ethanol I
rna	Ara+3	PWY-6028	10	acetoin degradation
rna	Ara+3	PWY-6617	10	adenosine nucleotides degradation III
rna	Ara+3	PWY0-1347	10	NADH to trimethylamine <i>N</i>-oxide electron transfer
rna	Ara+3	PWY0-1355	10	formate to trimethylamine <i>N</i>-oxide electron transfer
rna	Ara+3	PWYCQD-2	10	dTDP-<i>N</i>-acetylviosamine biosynthesis
rna	Ara+3	RIBOKIN-PWY	10	ribose degradation
rna	Ara+3	SERDEG-PWY	10	L-serine degradation
rna	Ara+4	DTDPRHAMSYN-PWY	10	dTDP-L-rhamnose biosynthesis I
rna	Ara+4	PWYCQD-2	10	dTDP-<i>N</i>-acetylviosamine biosynthesis
rna	Ara+5	GLYOXDEG-PWY	10	glycolate and glyoxylate degradation II
rna	Ara+5	PWY-4121	10	glutathionylspermidine biosynthesis
ribo	Ara-3	3-HYDROXYPHENYLACETATE-DEGRADATION-PWY	9.39645264330175	4-hydroxyphenylacetate degradation
rna	Ara-3	3-HYDROXYPHENYLACETATE-DEGRADATION-PWY	9.383675296335698	4-hydroxyphenylacetate degradation
rna	Ara-5	PWY-5340	9.379543072764735	sulfate activation for sulfonation
rna	Ara+2	SO4ASSIM-PWY	8.799409085737585	sulfate reduction I (assimilatory)
rna	Ara-3	PWY0-301	8.672780918212068	L-ascorbate degradation I (bacterial, anaerobic)
ribo	Ara-3	PWY0-301	8.661972607983078	L-ascorbate degradation I (bacterial, anaerobic)
ribo	Ara+2	PWY-5340	8.540354332709866	sulfate activation for sulfonation
ribo	Ara-5	PWY-5340	8.502614658124086	sulfate activation for sulfonation
ribo	Ara-2	PWY-5386	8.17880101185177	methylglyoxal degradation I
ribo	Ara-3	HOMOSERSYN-PWY	8.176492964745453	homoserine biosynthesis
rna	Ara-3	HOMOSERSYN-PWY	8.172810295311518	homoserine biosynthesis
ribo	Ara-2	PWYCQD-3	8.170590344695167	N-acetyl-galactosamine degradation
ribo	Ara+5	HOMOSERSYN-PWY	8.168331234721421	homoserine biosynthesis
rna	Ara-2	PWY-5386	8.166862661590853	methylglyoxal degradation I
rna	Ara+5	HOMOSERSYN-PWY	8.165708842331997	homoserine biosynthesis
rna	Ara-2	PWYCQD-3	8.1656108763725	N-acetyl-galactosamine degradation
ribo	Ara-3	PWY-5437	8.165160960117388	threonine degradation I
rna	Ara+3	HOMOSERSYN-PWY	8.16507193843464	homoserine biosynthesis
ribo	Ara+3	HOMOSERSYN-PWY	8.164970534465201	homoserine biosynthesis
rna	Ara-3	PWY-5437	8.164968688204969	threonine degradation I
rna	Ara-3	PWY-6961	7.797217548916492	L-ascorbate degradation II (bacterial, aerobic)
rna	Ara+2	SORBDEG-PWY	7.772564999794997	D-sorbitol degradation II
rna	Ara+3	SALVADEHYPOX-PWY	7.76147784399713	adenosine nucleotides degradation II
ribo	Ara+3	SALVADEHYPOX-PWY	7.761432464444461	adenosine nucleotides degradation II
ribo	Ara-3	PWY-6961	7.756723108798536	L-ascorbate degradation II (bacterial, aerobic)
ribo	Ara+2	RIBOKIN-PWY	7.49705077274958	ribose degradation
rna	Ara-1	OANTIGEN-PWY-1	7.451495782807266	<i>O</i>-antigen building blocks biosynthesis (<i>E. coli</i>)
rna	Ara-2	PWY-1801	7.427871845961756	formaldehyde oxidation II (glutathione-dependent)
ribo	Ara-1	OANTIGEN-PWY-1	7.417218728033785	<i>O</i>-antigen building blocks biosynthesis (<i>E. coli</i>)
ribo	Ara-2	OANTIGEN-PWY-1	7.410348701907919	<i>O</i>-antigen building blocks biosynthesis (<i>E. coli</i>)
ribo	Ara-2	ALADEG-PWY	7.408857449008948	alanine degradation I
rna	Ara-2	OANTIGEN-PWY-1	7.406809981603509	<i>O</i>-antigen building blocks biosynthesis (<i>E. coli</i>)
ribo	Ara-2	PWY-1801	7.404193109762323	formaldehyde oxidation II (glutathione-dependent)
rna	Ara+2	PWY-6772	7.396003343714994	hydrogen production V
rna	Ara-3	OANTIGEN-PWY-1	7.395955635707096	<i>O</i>-antigen building blocks biosynthesis (<i>E. coli</i>)
ribo	Ara-3	OANTIGEN-PWY-1	7.3940036441996	<i>O</i>-antigen building blocks biosynthesis (<i>E. coli</i>)
ribo	Ara+1	OANTIGEN-PWY-1	7.393218912611685	<i>O</i>-antigen building blocks biosynthesis (<i>E. coli</i>)
rna	Ara+2	OANTIGEN-PWY-1	7.392553631160624	<i>O</i>-antigen building blocks biosynthesis (<i>E. coli</i>)
rna	Ara+3	OANTIGEN-PWY-1	7.391926628214916	<i>O</i>-antigen building blocks biosynthesis (<i>E. coli</i>)
ribo	Ara+3	OANTIGEN-PWY-1	7.391921087464445	<i>O</i>-antigen building blocks biosynthesis (<i>E. coli</i>)
ribo	Ara-4	OANTIGEN-PWY-1	7.391708710250035	<i>O</i>-antigen building blocks biosynthesis (<i>E. coli</i>)
ribo	Ara+2	OANTIGEN-PWY-1	7.391665440882818	<i>O</i>-antigen building blocks biosynthesis (<i>E. coli</i>)
ribo	Ara+4	OANTIGEN-PWY-1	7.389710266824581	<i>O</i>-antigen building blocks biosynthesis (<i>E. coli</i>)
rna	Ara+1	OANTIGEN-PWY-1	7.389620983224289	<i>O</i>-antigen building blocks biosynthesis (<i>E. coli</i>)
rna	Ara-4	OANTIGEN-PWY-1	7.3894607701964015	<i>O</i>-antigen building blocks biosynthesis (<i>E. coli</i>)
rna	Ara-5	OANTIGEN-PWY-1	7.3891728065957585	<i>O</i>-antigen building blocks biosynthesis (<i>E. coli</i>)
ribo	Ara-5	OANTIGEN-PWY-1	7.388112271679959	<i>O</i>-antigen building blocks biosynthesis (<i>E. coli</i>)
rna	Ara+4	OANTIGEN-PWY-1	7.388105573324356	<i>O</i>-antigen building blocks biosynthesis (<i>E. coli</i>)
ribo	Ara-6	OANTIGEN-PWY-1	7.387603174477041	<i>O</i>-antigen building blocks biosynthesis (<i>E. coli</i>)
rna	Ara-6	OANTIGEN-PWY-1	7.386978774270708	<i>O</i>-antigen building blocks biosynthesis (<i>E. coli</i>)
rna	Ara+3	ACETOACETATE-DEG-PWY	7.385269546060776	acetoacetate degradation (to acetyl CoA)
rna	Ara-2	ALADEG-PWY	7.363035171129604	alanine degradation I
ribo	Ara-3	GLYOXDEG-PWY	7.359886917123804	glycolate and glyoxylate degradation II
rna	Ara-3	GLYOXDEG-PWY	7.33644552125439	glycolate and glyoxylate degradation II
ribo	Ara+2	PWY-6772	7.315855463674024	hydrogen production V
rna	Ara+2	RIBOKIN-PWY	7.27911695393296	ribose degradation
ribo	Ara+5	RIBOKIN-PWY	7.253923598738255	ribose degradation
ribo	Ara+4	RIBOKIN-PWY	7.252289607523659	ribose degradation
ribo	Ara+3	ACETOACETATE-DEG-PWY	7.24520137169376	acetoacetate degradation (to acetyl CoA)
ribo	Ara-3	DETOX1-PWY	7.232826292038364	superoxide radicals degradation
rna	Ara+5	RIBOKIN-PWY	7.227456545716125	ribose degradation
ribo	Ara+3	DETOX1-PWY	7.221410310193623	superoxide radicals degradation
rna	Ara+3	PWY-1801	7.220713374229945	formaldehyde oxidation II (glutathione-dependent)
rna	Ara+1	ACETOACETATE-DEG-PWY	7.201164248682504	acetoacetate degradation (to acetyl CoA)
rna	Ara-1	AMMASSIM-PWY	7.1897709045349245	ammonia assimilation cycle III
ribo	Ara+1	ACETOACETATE-DEG-PWY	7.188667757224143	acetoacetate degradation (to acetyl CoA)
rna	Ara+4	RIBOKIN-PWY	7.177283760045585	ribose degradation
ribo	Ara+3	PWY-1801	7.17489604406747	formaldehyde oxidation II (glutathione-dependent)
rna	Ara+3	DETOX1-PWY	7.144327043739732	superoxide radicals degradation
rna	Ara-3	PWY0-661	7.14190907528812	PRPP biosynthesis II
ribo	Ara+2	SORBDEG-PWY	7.139439391117452	D-sorbitol degradation II
ribo	Ara-1	AMMASSIM-PWY	7.138901352879397	ammonia assimilation cycle III
rna	Ara-3	DETOX1-PWY	7.1317636623018466	superoxide radicals degradation
rna	Ara-3	LYXMET-PWY	7.1282155434994605	L-lyxose degradation
ribo	Ara-3	PWY0-661	7.114623385701421	PRPP biosynthesis II
ribo	Ara+1	PWY-40	7.102592148125417	putrescine biosynthesis I
ribo	Ara+1	PWY0-823	7.102592148125417	arginine degradation III (arginine decarboxylase/agmatinase pathway)
ribo	Ara+3	PWY-5436	7.095907337128605	threonine degradation IV
ribo	Ara+2	PWY-7315	7.093102187536231	dTDP-<i>N</i>-acetylthomosamine biosynthesis
rna	Ara+1	PWY-40	7.092414422100007	putrescine biosynthesis I
rna	Ara+1	PWY0-823	7.092414422100007	arginine degradation III (arginine decarboxylase/agmatinase pathway)
ribo	Ara-3	PWY-40	7.091521618579848	putrescine biosynthesis I
ribo	Ara-3	PWY0-823	7.091521618579848	arginine degradation III (arginine decarboxylase/agmatinase pathway)
rna	Ara-3	PWY-40	7.090913141253996	putrescine biosynthesis I
rna	Ara-3	PWY0-823	7.090913141253996	arginine degradation III (arginine decarboxylase/agmatinase pathway)
ribo	Ara-3	PWY-7315	7.088999661401598	dTDP-<i>N</i>-acetylthomosamine biosynthesis
rna	Ara-3	PWY-7315	7.088186208341274	dTDP-<i>N</i>-acetylthomosamine biosynthesis
rna	Ara-3	THRDLCTCAT-PWY	7.087191469157708	threonine degradation III (to methylglyoxal)
rna	Ara-3	PWY0-1317	7.082732051535417	L-lactaldehyde degradation (aerobic)
ribo	Ara-3	THRDLCTCAT-PWY	7.081947050696801	threonine degradation III (to methylglyoxal)
ribo	Ara-3	LYXMET-PWY	7.081849565877147	L-lyxose degradation
ribo	Ara-3	PWY-7242	7.081452019790048	D-fructuronate degradation
rna	Ara+3	PWY-6605	7.081163761586258	adenine and adenosine salvage II
rna	Ara+1	PWY-7315	7.080016359625539	dTDP-<i>N</i>-acetylthomosamine biosynthesis
ribo	Ara-2	PWY-901	7.07992422950675	methylglyoxal degradation II
rna	Ara+2	PWY-7315	7.079042457814627	dTDP-<i>N</i>-acetylthomosamine biosynthesis
rna	Ara-3	PWY0-1280	7.077935719942791	ethylene glycol degradation
rna	Ara+3	PWY-5436	7.076891518187596	threonine degradation IV
rna	Ara-2	PWY-7315	7.076671826933931	dTDP-<i>N</i>-acetylthomosamine biosynthesis
ribo	Ara+4	PWY-6890	7.076463399968661	4-amino-2-methyl-5-diphosphomethylpyrimidine biosynthesis
ribo	Ara+1	PWY-7315	7.076223763753896	dTDP-<i>N</i>-acetylthomosamine biosynthesis
ribo	Ara-3	PWY-1801	7.075934510815545	formaldehyde oxidation II (glutathione-dependent)
ribo	Ara-4	COBALSYN-PWY	7.075332254572211	adenosylcobalamin salvage from cobinamide I
ribo	Ara-4	PWY-7315	7.0753011253360745	dTDP-<i>N</i>-acetylthomosamine biosynthesis
ribo	Ara-4	DETOX1-PWY	7.075270021099996	superoxide radicals degradation
ribo	Ara+3	PWY-6605	7.074989976260191	adenine and adenosine salvage II
rna	Ara+4	PWY-6890	7.074792909290429	4-amino-2-methyl-5-diphosphomethylpyrimidine biosynthesis
rna	Ara-2	PWY-901	7.074628540572712	methylglyoxal degradation II
rna	Ara-2	PWY0-1300	7.074537162086163	2-<I>O</I>-&alpha;-mannosyl-D-glycerate degradation
ribo	Ara+1	PWY-901	7.073973887150848	methylglyoxal degradation II
ribo	Ara-4	PWY-5453	7.073824639581932	methylglyoxal degradation III
rna	Ara-6	AMMASSIM-PWY	7.073441305417909	ammonia assimilation cycle III
rna	Ara+4	GALACTITOLCAT-PWY	7.07343056029359	galactitol degradation
rna	Ara+4	PWYCQD-4	7.07343056029359	galactosamine degradation
rna	Ara-4	DETOX1-PWY	7.073318732691971	superoxide radicals degradation
rna	Ara+3	PWY-6556	7.073264218850441	pyrimidine ribonucleosides salvage II
ribo	Ara-2	PWY-6890	7.0730738454862525	4-amino-2-methyl-5-diphosphomethylpyrimidine biosynthesis
ribo	Ara-4	GALACTITOLCAT-PWY	7.073044013162926	galactitol degradation
ribo	Ara-4	PWYCQD-4	7.073044013162926	galactosamine degradation
ribo	Ara+3	PWY-6556	7.072981009792325	pyrimidine ribonucleosides salvage II
rna	Ara+4	PWY-6164	7.072972842272077	3-dehydroquinate biosynthesis I
rna	Ara-5	PWY-7315	7.07294527862706	dTDP-<i>N</i>-acetylthomosamine biosynthesis
ribo	Ara+3	PWY-7315	7.072835857591857	dTDP-<i>N</i>-acetylthomosamine biosynthesis
rna	Ara-1	PWY-7315	7.072721814311433	dTDP-<i>N</i>-acetylthomosamine biosynthesis
rna	Ara-4	GALACTITOLCAT-PWY	7.072704289112904	galactitol degradation
rna	Ara-4	PWYCQD-4	7.072704289112904	galactosamine degradation
ribo	Ara-3	PWY0-1280	7.072649173176	ethylene glycol degradation
rna	Ara-3	PWY-7242	7.072530560954743	D-fructuronate degradation
ribo	Ara-4	PWY-7242	7.072529127515576	D-fructuronate degradation
rna	Ara-2	PWY-6890	7.0722435949985325	4-amino-2-methyl-5-diphosphomethylpyrimidine biosynthesis
ribo	Ara-2	PWY-7315	7.071983847614276	dTDP-<i>N</i>-acetylthomosamine biosynthesis
ribo	Ara+4	GALACTITOLCAT-PWY	7.071979749861575	galactitol degradation
ribo	Ara+4	PWYCQD-4	7.071979749861575	galactosamine degradation
rna	Ara+3	PWY-7315	7.071972321958193	dTDP-<i>N</i>-acetylthomosamine biosynthesis
ribo	Ara-5	PWY-7315	7.071881896624044	dTDP-<i>N</i>-acetylthomosamine biosynthesis
rna	Ara+1	PWY-901	7.071684847602615	methylglyoxal degradation II
rna	Ara+4	PWY-7315	7.071671303314555	dTDP-<i>N</i>-acetylthomosamine biosynthesis
ribo	Ara-6	PWY-7315	7.071548861175366	dTDP-<i>N</i>-acetylthomosamine biosynthesis
rna	Ara-4	PWY-7315	7.071472108922605	dTDP-<i>N</i>-acetylthomosamine biosynthesis
ribo	Ara+5	PWY-6164	7.071371957799753	3-dehydroquinate biosynthesis I
rna	Ara-4	COBALSYN-PWY	7.071371564082787	adenosylcobalamin salvage from cobinamide I
ribo	Ara-6	AMMASSIM-PWY	7.071354495407581	ammonia assimilation cycle III
ribo	Ara-3	PWY0-1317	7.071303751073526	L-lactaldehyde degradation (aerobic)
ribo	Ara+1	PWY0-661	7.071282321659746	PRPP biosynthesis II
ribo	Ara+4	PWY-7315	7.071261501213409	dTDP-<i>N</i>-acetylthomosamine biosynthesis
rna	Ara+1	PWY0-661	7.071194394660379	PRPP biosynthesis II
rna	Ara-6	PWY-7315	7.07119243814906	dTDP-<i>N</i>-acetylthomosamine biosynthesis
rna	Ara+5	PWY-6164	7.071158755789498	3-dehydroquinate biosynthesis I
rna	Ara-4	PWY-7242	7.071154808063885	D-fructuronate degradation
rna	Ara-4	PWY-6890	7.071121601716377	4-amino-2-methyl-5-diphosphomethylpyrimidine biosynthesis
ribo	Ara-1	PWY-7315	7.071105417530202	dTDP-<i>N</i>-acetylthomosamine biosynthesis
rna	Ara-3	PWY-1801	7.0711052854764125	formaldehyde oxidation II (glutathione-dependent)
ribo	Ara-4	PWY-6890	7.071082695582128	4-amino-2-methyl-5-diphosphomethylpyrimidine biosynthesis
rna	Ara-4	PWY-5453	7.07107182128245	methylglyoxal degradation III
ribo	Ara+4	PWY-6164	7.071068037808286	3-dehydroquinate biosynthesis I
ribo	Ara-2	PWY0-1300	7.07106786210672	2-<I>O</I>-&alpha;-mannosyl-D-glycerate degradation
ribo	Ara+2	PWY-1269	7.06142261825549	CMP-KDO biosynthesis I
rna	Ara+2	PWY-1269	6.904966903809535	CMP-KDO biosynthesis I
rna	Ara-5	SO4ASSIM-PWY	6.729486483205471	sulfate reduction I (assimilatory)
ribo	Ara+2	SO4ASSIM-PWY	6.52602280442176	sulfate reduction I (assimilatory)
ribo	Ara-2	SALVADEHYPOX-PWY	6.3796538034720776	adenosine nucleotides degradation II
rna	Ara-2	SALVADEHYPOX-PWY	6.368447407956863	adenosine nucleotides degradation II
ribo	Ara-3	SALVADEHYPOX-PWY	6.353026273891105	adenosine nucleotides degradation II
ribo	Ara+2	NONOXIPENT-PWY	6.348336365914446	pentose phosphate pathway (non-oxidative branch)
rna	Ara-3	SALVADEHYPOX-PWY	6.347714463126304	adenosine nucleotides degradation II
rna	Ara+2	NONOXIPENT-PWY	6.337373469056323	pentose phosphate pathway (non-oxidative branch)
ribo	Ara-5	SO4ASSIM-PWY	6.140349142729976	sulfate reduction I (assimilatory)
ribo	Ara+5	METSYN-PWY	6.136413614097941	homoserine and methionine biosynthesis
rna	Ara+5	METSYN-PWY	6.131522594663632	homoserine and methionine biosynthesis
rna	Ara-6	PWY0-1324	6.037815134764652	<i>N</i>-acetylneuraminate and <i>N</i>-acetylmannosamine degradation
ribo	Ara-2	ALANINE-VALINESYN-PWY	6.0360771284992705	alanine biosynthesis I
ribo	Ara-3	GLUCUROCAT-PWY	6.031156578599149	superpathway of &beta;-D-glucuronide and D-glucuronate degradation
rna	Ara+2	SULFATE-CYS-PWY	5.924354375221486	superpathway of sulfate assimilation and cysteine biosynthesis
rna	Ara-2	ALANINE-VALINESYN-PWY	5.910226597074562	alanine biosynthesis I
ribo	Ara-3	THRESYN-PWY	5.900559837144325	threonine biosynthesis
rna	Ara-3	THRESYN-PWY	5.881109781479034	threonine biosynthesis
rna	Ara+3	PWY-6772	5.866942060574077	hydrogen production V
ribo	Ara+3	IDNCAT-PWY	5.826628938289465	L-idonate degradation
rna	Ara+3	THRESYN-PWY	5.8170514158840785	threonine biosynthesis
ribo	Ara+3	THRESYN-PWY	5.814351530434102	threonine biosynthesis
rna	Ara-3	GLUCUROCAT-PWY	5.808648311167015	superpathway of &beta;-D-glucuronide and D-glucuronate degradation
ribo	Ara-3	ALANINE-VALINESYN-PWY	5.806767337265888	alanine biosynthesis I
ribo	Ara-3	PWY-5386	5.806081726816044	methylglyoxal degradation I
rna	Ara-3	ALANINE-VALINESYN-PWY	5.805590006952282	alanine biosynthesis I
rna	Ara-3	PWY0-44	5.802911054922449	D-allose degradation
rna	Ara+3	PWY-6611	5.800532979813609	adenine and adenosine salvage V
ribo	Ara+3	PWY-6611	5.800267492295781	adenine and adenosine salvage V
ribo	Ara-6	PWY0-1324	5.799860402302187	<i>N</i>-acetylneuraminate and <i>N</i>-acetylmannosamine degradation
ribo	Ara-4	PWY0-1545	5.799189900798832	cardiolipin biosynthesis III
rna	Ara+3	IDNCAT-PWY	5.793916830309941	L-idonate degradation
ribo	Ara-4	GLUCUROCAT-PWY	5.793208736235826	superpathway of &beta;-D-glucuronide and D-glucuronate degradation
ribo	Ara+5	MET-SAM-PWY	5.792597050485002	superpathway of <i>S</i>-adenosyl-L-methionine biosynthesis
rna	Ara+5	MET-SAM-PWY	5.789259703105846	superpathway of <i>S</i>-adenosyl-L-methionine biosynthesis
ribo	Ara+5	THRESYN-PWY	5.78923168075083	threonine biosynthesis
rna	Ara-4	PWY0-1545	5.787979789978566	cardiolipin biosynthesis III
rna	Ara-3	PWY-5386	5.7879438210134255	methylglyoxal degradation I
ribo	Ara-5	PWY-5668	5.7877987719506265	cardiolipin biosynthesis I
ribo	Ara-3	PWY0-44	5.785772333005724	D-allose degradation
ribo	Ara-3	ARABCAT-PWY	5.784182964742319	L-arabinose degradation I
rna	Ara-2	PWY0-1324	5.7838377691742275	<i>N</i>-acetylneuraminate and <i>N</i>-acetylmannosamine degradation
rna	Ara+5	THRESYN-PWY	5.783618300750867	threonine biosynthesis
ribo	Ara+3	PWY-5162	5.782805357490275	2-oxopentenoate degradation
rna	Ara-5	PWY-5668	5.782376287838818	cardiolipin biosynthesis I
ribo	Ara+3	PWY-7180	5.782101853179365	2'-deoxy-&alpha;-D-ribose 1-phosphate degradation
rna	Ara-4	ARABCAT-PWY	5.781474225232159	L-arabinose degradation I
ribo	Ara-4	ARABCAT-PWY	5.780694916421784	L-arabinose degradation I
rna	Ara+3	PWY0-1338	5.779633396938813	polymyxin resistance
ribo	Ara-2	PWY0-1324	5.7796293249929125	<i>N</i>-acetylneuraminate and <i>N</i>-acetylmannosamine degradation
ribo	Ara-2	COBALSYN-PWY	5.779303490315919	adenosylcobalamin salvage from cobinamide I
ribo	Ara+3	PWY-5386	5.779045697544308	methylglyoxal degradation I
rna	Ara+3	PWY-5162	5.778924876259997	2-oxopentenoate degradation
rna	Ara+3	PWY-7180	5.77735973266149	2'-deoxy-&alpha;-D-ribose 1-phosphate degradation
rna	Ara+3	PWY-5386	5.777326259488301	methylglyoxal degradation I
ribo	Ara+3	PWY0-1338	5.776616030390066	polymyxin resistance
rna	Ara-2	COBALSYN-PWY	5.776289390126003	adenosylcobalamin salvage from cobinamide I
rna	Ara+4	PWYCQD-3	5.775747730678418	N-acetyl-galactosamine degradation
rna	Ara-4	PWYCQD-3	5.775228552283524	N-acetyl-galactosamine degradation
ribo	Ara-4	PWYCQD-3	5.775167909050063	N-acetyl-galactosamine degradation
rna	Ara-4	GLUCUROCAT-PWY	5.774540732541454	superpathway of &beta;-D-glucuronide and D-glucuronate degradation
rna	Ara-3	ARABCAT-PWY	5.774389106863549	L-arabinose degradation I
ribo	Ara+4	PWYCQD-3	5.774247368384325	N-acetyl-galactosamine degradation
rna	Ara-4	PWY-5837	5.5119534868745985	1,4-dihydroxy-2-naphthoate biosynthesis I
ribo	Ara-3	PWY-5837	5.48110223631288	1,4-dihydroxy-2-naphthoate biosynthesis I
ribo	Ara-3	GLYCOL-GLYOXDEG-PWY	5.462851505990593	superpathway of glycol metabolism and degradation
rna	Ara-3	GLYCOL-GLYOXDEG-PWY	5.454434715836536	superpathway of glycol metabolism and degradation
ribo	Ara-4	PWY-5837	5.433960677471363	1,4-dihydroxy-2-naphthoate biosynthesis I
rna	Ara-3	PWY-5837	5.3994956617006284	1,4-dihydroxy-2-naphthoate biosynthesis I
ribo	Ara+3	PWY-6772	5.393589617302421	hydrogen production V
rna	Ara+3	VALSYN-PWY	5.393427516983964	valine biosynthesis
ribo	Ara-2	PWY-5837	5.377598296344898	1,4-dihydroxy-2-naphthoate biosynthesis I
ribo	Ara+3	PWY0-1297	5.374000104935828	superpathway of purine deoxyribonucleosides degradation
rna	Ara+3	PWY0-1297	5.369395602019611	superpathway of purine deoxyribonucleosides degradation
rna	Ara-2	PWY-5837	5.361816855580514	1,4-dihydroxy-2-naphthoate biosynthesis I
ribo	Ara-4	GLYCOL-GLYOXDEG-PWY	5.3559182199100395	superpathway of glycol metabolism and degradation
rna	Ara-4	GLYCOL-GLYOXDEG-PWY	5.355127441373733	superpathway of glycol metabolism and degradation
ribo	Ara+5	GLYCOL-GLYOXDEG-PWY	5.350836344186875	superpathway of glycol metabolism and degradation
rna	Ara+5	GLYCOL-GLYOXDEG-PWY	5.34754477493746	superpathway of glycol metabolism and degradation
ribo	Ara+3	VALSYN-PWY	5.310111287635924	valine biosynthesis
ribo	Ara+3	AST-PWY	5.190851311598837	arginine degradation II (AST pathway)
ribo	Ara-2	HEXITOLDEGSUPER-PWY	5.18956507016965	superpathway of hexitol degradation (bacteria)
rna	Ara-2	HEXITOLDEGSUPER-PWY	5.18127727467032	superpathway of hexitol degradation (bacteria)
ribo	Ara-2	PWY-6151	5.162773919669743	<i>S</i>-adenosyl-L-methionine cycle I
rna	Ara-2	PWY-6151	5.124063537205364	<i>S</i>-adenosyl-L-methionine cycle I
rna	Ara+3	PWY-6609	5.105480452824774	adenine and adenosine salvage III
ribo	Ara+3	PWY-6609	5.08167879127518	adenine and adenosine salvage III
rna	Ara+3	AST-PWY	5.066562449557454	arginine degradation II (AST pathway)
ribo	Ara-2	HOMOSER-METSYN-PWY	5.0588841853114275	methionine biosynthesis I
ribo	Ara-2	PWY-6608	5.058178788446621	guanosine nucleotides degradation III
rna	Ara-3	METSYN-PWY	5.056330357611094	homoserine and methionine biosynthesis
ribo	Ara-3	METHGLYUT-PWY	5.0558464537379315	superpathway of methylglyoxal degradation
ribo	Ara-3	METSYN-PWY	5.055507966168398	homoserine and methionine biosynthesis
rna	Ara-4	LYXMET-PWY	5.053623786405237	L-lyxose degradation
ribo	Ara+3	PWY-7179	5.046311384896181	purine deoxyribonucleosides degradation
ribo	Ara+3	METSYN-PWY	5.04327663531347	homoserine and methionine biosynthesis
rna	Ara+3	PWY-7179	5.041805417585487	purine deoxyribonucleosides degradation
rna	Ara+1	PWY-7446	5.0377652749665804	sulfoglycolysis
ribo	Ara-3	THREOCAT-PWY	5.0371526760467384	superpathway of threonine metabolism
rna	Ara-3	PWY-6608	5.031978767427792	guanosine nucleotides degradation III
rna	Ara-2	PWY-6608	5.031865397916198	guanosine nucleotides degradation III
ribo	Ara-3	PWY-6608	5.031659271778146	guanosine nucleotides degradation III
rna	Ara+3	METSYN-PWY	5.0316354079810495	homoserine and methionine biosynthesis
rna	Ara+3	PWY-6608	5.031531038252769	guanosine nucleotides degradation III
rna	Ara-3	THREOCAT-PWY	5.031463386410391	superpathway of threonine metabolism
ribo	Ara+3	PWY-6608	5.03061248986539	guanosine nucleotides degradation III
ribo	Ara-4	LYXMET-PWY	5.026682191763724	L-lyxose degradation
rna	Ara-3	METHGLYUT-PWY	5.0253715282362945	superpathway of methylglyoxal degradation
rna	Ara+3	PWY-5659	5.024345612852413	GDP-mannose biosynthesis
ribo	Ara-3	PWY-5659	5.023126522413262	GDP-mannose biosynthesis
ribo	Ara+3	PWY-5659	5.022856882963926	GDP-mannose biosynthesis
rna	Ara-2	PWY-5659	5.022045771597798	GDP-mannose biosynthesis
rna	Ara-3	PWY-5659	5.020510183949773	GDP-mannose biosynthesis
ribo	Ara+2	PENTOSE-P-PWY	5.019504799394403	pentose phosphate pathway
ribo	Ara-2	METHGLYUT-PWY	5.018909567351037	superpathway of methylglyoxal degradation
ribo	Ara+1	PWY-1269	5.016538853018356	CMP-KDO biosynthesis I
ribo	Ara-4	PWY0-301	5.016390477108303	L-ascorbate degradation I (bacterial, anaerobic)
ribo	Ara-4	GLYCOLATEMET-PWY	5.015883869585119	glycolate and glyoxylate degradation I
rna	Ara-4	GLYCOLATEMET-PWY	5.015369538456286	glycolate and glyoxylate degradation I
rna	Ara-4	PWY-5659	5.013812819704877	GDP-mannose biosynthesis
ribo	Ara-3	GLYCOLATEMET-PWY	5.0129487957730845	glycolate and glyoxylate degradation I
ribo	Ara+4	PWY-5659	5.012140075369204	GDP-mannose biosynthesis
rna	Ara+2	PENTOSE-P-PWY	5.011868761968487	pentose phosphate pathway
rna	Ara-4	PWY0-301	5.0117325886160735	L-ascorbate degradation I (bacterial, anaerobic)
rna	Ara+5	PWY-6772	5.0107286667817466	hydrogen production V
rna	Ara-3	GLYCOLATEMET-PWY	5.010359083970633	glycolate and glyoxylate degradation I
rna	Ara+4	PWY-5659	5.007681808730098	GDP-mannose biosynthesis
rna	Ara-2	METHGLYUT-PWY	5.006561704071609	superpathway of methylglyoxal degradation
rna	Ara-1	PWY-5659	5.0057188000732	GDP-mannose biosynthesis
ribo	Ara-3	PWY-1269	5.0055283586218255	CMP-KDO biosynthesis I
rna	Ara-3	PWY-1269	5.005515253444518	CMP-KDO biosynthesis I
ribo	Ara-2	PWY-5659	5.005379743174173	GDP-mannose biosynthesis
ribo	Ara-1	PWY-5659	5.0052664951264925	GDP-mannose biosynthesis
rna	Ara+3	PWY-1269	5.004508322792129	CMP-KDO biosynthesis I
rna	Ara+5	GLYCOLATEMET-PWY	5.003803509298735	glycolate and glyoxylate degradation I
ribo	Ara+3	PWY-1269	5.003348625915676	CMP-KDO biosynthesis I
rna	Ara+1	PWY-1269	5.003149948836112	CMP-KDO biosynthesis I
ribo	Ara+5	GLYCOLATEMET-PWY	5.003007060939724	glycolate and glyoxylate degradation I
ribo	Ara-4	PWY-5659	5.002634246699027	GDP-mannose biosynthesis
ribo	Ara+1	PWY-7446	5.002208016174789	sulfoglycolysis
ribo	Ara-5	PWY-5659	5.001885290524807	GDP-mannose biosynthesis
rna	Ara-5	PWY-5659	5.000949465414977	GDP-mannose biosynthesis
ribo	Ara-2	PWY0-1061	4.976448955440205	superpathway of alanine biosynthesis
rna	Ara-2	HOMOSER-METSYN-PWY	4.972398527070655	methionine biosynthesis I
ribo	Ara-3	GALACT-GLUCUROCAT-PWY	4.939316700228061	superpathway of hexuronide and hexuronate degradation
rna	Ara+3	ILEUSYN-PWY	4.902173887859803	isoleucine biosynthesis I (from threonine)
rna	Ara+2	NONMEVIPP-PWY	4.859124522670536	methylerythritol phosphate pathway
ribo	Ara+3	ILEUSYN-PWY	4.823543865991472	isoleucine biosynthesis I (from threonine)
rna	Ara-2	PWY0-1061	4.802227310951389	superpathway of alanine biosynthesis
ribo	Ara-3	MET-SAM-PWY	4.784298257458965	superpathway of <i>S</i>-adenosyl-L-methionine biosynthesis
rna	Ara-3	MET-SAM-PWY	4.777047999684731	superpathway of <i>S</i>-adenosyl-L-methionine biosynthesis
ribo	Ara+3	MET-SAM-PWY	4.755167049091535	superpathway of <i>S</i>-adenosyl-L-methionine biosynthesis
ribo	Ara-3	ECASYN-PWY	4.751524472653221	enterobacterial common antigen biosynthesis
rna	Ara-3	GALACT-GLUCUROCAT-PWY	4.7444306874584905	superpathway of hexuronide and hexuronate degradation
rna	Ara+3	MET-SAM-PWY	4.74398179677574	superpathway of <i>S</i>-adenosyl-L-methionine biosynthesis
ribo	Ara+2	ECASYN-PWY	4.735912736342325	enterobacterial common antigen biosynthesis
rna	Ara-3	ECASYN-PWY	4.735690928278075	enterobacterial common antigen biosynthesis
rna	Ara-1	ECASYN-PWY	4.73428771890745	enterobacterial common antigen biosynthesis
ribo	Ara-4	GALACT-GLUCUROCAT-PWY	4.731662232283972	superpathway of hexuronide and hexuronate degradation
rna	Ara-2	ECASYN-PWY	4.730492907781183	enterobacterial common antigen biosynthesis
rna	Ara+2	ECASYN-PWY	4.726145462248878	enterobacterial common antigen biosynthesis
rna	Ara+1	ECASYN-PWY	4.726139023256372	enterobacterial common antigen biosynthesis
ribo	Ara-1	ECASYN-PWY	4.723892559513699	enterobacterial common antigen biosynthesis
ribo	Ara-4	ECASYN-PWY	4.722203335094618	enterobacterial common antigen biosynthesis
rna	Ara-5	ECASYN-PWY	4.721553110491734	enterobacterial common antigen biosynthesis
ribo	Ara+1	ECASYN-PWY	4.72126234672529	enterobacterial common antigen biosynthesis
rna	Ara+3	ECASYN-PWY	4.72092938615507	enterobacterial common antigen biosynthesis
ribo	Ara-2	ECASYN-PWY	4.720817229353127	enterobacterial common antigen biosynthesis
ribo	Ara+3	ECASYN-PWY	4.7206739667504	enterobacterial common antigen biosynthesis
ribo	Ara+4	ECASYN-PWY	4.720037026565224	enterobacterial common antigen biosynthesis
ribo	Ara-5	ECASYN-PWY	4.719292236233412	enterobacterial common antigen biosynthesis
rna	Ara-4	GALACT-GLUCUROCAT-PWY	4.7189951838438935	superpathway of hexuronide and hexuronate degradation
ribo	Ara-6	ECASYN-PWY	4.718944340646225	enterobacterial common antigen biosynthesis
rna	Ara-4	ECASYN-PWY	4.718151897784889	enterobacterial common antigen biosynthesis
rna	Ara+4	ECASYN-PWY	4.716818958915234	enterobacterial common antigen biosynthesis
rna	Ara-6	ECASYN-PWY	4.714583612991087	enterobacterial common antigen biosynthesis
ribo	Ara+5	PWY-6772	4.703503778134463	hydrogen production V
rna	Ara-6	GLCMANNANAUT-PWY	4.679680803974602	superpathway of <i>N</i>-acetylglucosamine, <i>N</i>-acetylmannosamine and <i>N</i>-acetylneuraminate degradation
rna	Ara-4	PWY-5838	4.630276216612215	superpathway of menaquinol-8 biosynthesis I
ribo	Ara-3	PWY-5838	4.586709011152633	superpathway of menaquinol-8 biosynthesis I
ribo	Ara-2	GLCMANNANAUT-PWY	4.5760245094668175	superpathway of <i>N</i>-acetylglucosamine, <i>N</i>-acetylmannosamine and <i>N</i>-acetylneuraminate degradation
ribo	Ara-4	PWY-5838	4.564304402279629	superpathway of menaquinol-8 biosynthesis I
ribo	Ara-3	PWY0-1061	4.54833130081645	superpathway of alanine biosynthesis
rna	Ara-3	PWY0-1061	4.54422893392924	superpathway of alanine biosynthesis
ribo	Ara-6	GLCMANNANAUT-PWY	4.536261250764673	superpathway of <i>N</i>-acetylglucosamine, <i>N</i>-acetylmannosamine and <i>N</i>-acetylneuraminate degradation
rna	Ara-5	SULFATE-CYS-PWY	4.5360589034768095	superpathway of sulfate assimilation and cysteine biosynthesis
ribo	Ara-3	NONOXIPENT-PWY	4.533084768484711	pentose phosphate pathway (non-oxidative branch)
ribo	Ara-3	ILEUSYN-PWY	4.530109053868583	isoleucine biosynthesis I (from threonine)
rna	Ara-3	ILEUSYN-PWY	4.5263344819939775	isoleucine biosynthesis I (from threonine)
rna	Ara-4	PWY-6961	4.521985126809659	L-ascorbate degradation II (bacterial, aerobic)
rna	Ara-3	PWY-5838	4.519207581728402	superpathway of menaquinol-8 biosynthesis I
ribo	Ara-2	PWY-5838	4.509026739950775	superpathway of menaquinol-8 biosynthesis I
ribo	Ara+4	HEXITOLDEGSUPER-PWY	4.506707518156304	superpathway of hexitol degradation (bacteria)
rna	Ara-2	GLCMANNANAUT-PWY	4.500384878548372	superpathway of <i>N</i>-acetylglucosamine, <i>N</i>-acetylmannosamine and <i>N</i>-acetylneuraminate degradation
ribo	Ara+5	PWY0-42	4.499897228608145	2-methylcitrate cycle I
rna	Ara-5	AST-PWY	4.498876398162492	arginine degradation II (AST pathway)
rna	Ara-3	NONOXIPENT-PWY	4.49824988788785	pentose phosphate pathway (non-oxidative branch)
rna	Ara-2	PWY-5838	4.496788004036949	superpathway of menaquinol-8 biosynthesis I
ribo	Ara+5	HOMOSER-METSYN-PWY	4.496213314911017	methionine biosynthesis I
rna	Ara+5	PWY0-42	4.495535517273323	2-methylcitrate cycle I
ribo	Ara-4	PWY-6961	4.493152413074766	L-ascorbate degradation II (bacterial, aerobic)
ribo	Ara-5	LEUSYN-PWY	4.488946670121962	leucine biosynthesis
rna	Ara+5	HOMOSER-METSYN-PWY	4.48838839535413	methionine biosynthesis I
rna	Ara-4	PWY0-42	4.487160178530506	2-methylcitrate cycle I
rna	Ara+3	GALACTMETAB-PWY	4.483849148786625	galactose degradation I (Leloir pathway)
rna	Ara-5	LEUSYN-PWY	4.483830382810363	leucine biosynthesis
ribo	Ara-5	AST-PWY	4.483825881350632	arginine degradation II (AST pathway)
ribo	Ara+3	GALACTMETAB-PWY	4.481364875197503	galactose degradation I (Leloir pathway)
ribo	Ara-6	HOMOSER-METSYN-PWY	4.481023091574067	methionine biosynthesis I
ribo	Ara+1	HOMOSER-METSYN-PWY	4.480893244250583	methionine biosynthesis I
rna	Ara+1	NONOXIPENT-PWY	4.480367961409629	pentose phosphate pathway (non-oxidative branch)
ribo	Ara+1	NONOXIPENT-PWY	4.480178499596668	pentose phosphate pathway (non-oxidative branch)
rna	Ara+1	HOMOSER-METSYN-PWY	4.479868603200055	methionine biosynthesis I
rna	Ara+4	HEXITOLDEGSUPER-PWY	4.479314067177454	superpathway of hexitol degradation (bacteria)
ribo	Ara-4	PWY0-42	4.478912628222519	2-methylcitrate cycle I
rna	Ara-6	HOMOSER-METSYN-PWY	4.476855140023279	methionine biosynthesis I
ribo	Ara+2	SULFATE-CYS-PWY	4.4116773390052515	superpathway of sulfate assimilation and cysteine biosynthesis
rna	Ara+4	GLYOXDEG-PWY	4.383226576059238	glycolate and glyoxylate degradation II
ribo	Ara+4	PWY0-1313	4.3455866479112	acetate conversion to acetyl-CoA
ribo	Ara+4	PWY-5484	4.311041798308587	glycolysis II (from fructose-6P)
ribo	Ara-2	PWY-5484	4.299713073131952	glycolysis II (from fructose-6P)
rna	Ara+3	THREOCAT-PWY	4.297028687502115	superpathway of threonine metabolism
ribo	Ara+5	GLYOXYLATE-BYPASS	4.29228377435138	glyoxylate cycle
rna	Ara-2	PWY-5484	4.290339101834574	glycolysis II (from fructose-6P)
rna	Ara+4	PWY-5484	4.273392789569571	glycolysis II (from fructose-6P)
rna	Ara+5	GLYOXYLATE-BYPASS	4.270443278275627	glyoxylate cycle
ribo	Ara+3	THREOCAT-PWY	4.267417129556209	superpathway of threonine metabolism
rna	Ara+3	BRANCHED-CHAIN-AA-SYN-PWY	4.226781053651233	superpathway of leucine, valine, and isoleucine biosynthesis
ribo	Ara+4	GLYOXDEG-PWY	4.211342022811964	glycolate and glyoxylate degradation II
ribo	Ara+3	BRANCHED-CHAIN-AA-SYN-PWY	4.176151361338933	superpathway of leucine, valine, and isoleucine biosynthesis
ribo	Ara-5	SULFATE-CYS-PWY	4.141453322403304	superpathway of sulfate assimilation and cysteine biosynthesis
ribo	Ara-2	METSYN-PWY	4.13285444380736	homoserine and methionine biosynthesis
ribo	Ara+4	GLYCOLYSIS	4.132112118071659	glycolysis I (from glucose-6P)
rna	Ara+1	ANARESP1-PWY	4.128607139352712	respiration (anaerobic)
ribo	Ara+3	PWY0-1296	4.125639258585782	purine ribonucleosides degradation
ribo	Ara+1	POLYAMSYN-PWY	4.123853375501415	superpathway of polyamine biosynthesis I
rna	Ara+1	POLYAMSYN-PWY	4.122480498032662	superpathway of polyamine biosynthesis I
ribo	Ara+1	ANARESP1-PWY	4.121019034548253	respiration (anaerobic)
rna	Ara-3	POLYAMSYN-PWY	4.119370264935973	superpathway of polyamine biosynthesis I
rna	Ara+3	PWY0-1296	4.118094266837549	purine ribonucleosides degradation
ribo	Ara-2	GLYCOLYSIS	4.1174299566898	glycolysis I (from glucose-6P)
ribo	Ara-3	POLYAMSYN-PWY	4.11264262093814	superpathway of polyamine biosynthesis I
ribo	Ara-4	TCA-GLYOX-BYPASS	4.110912645457128	superpathway of glyoxylate bypass and TCA
rna	Ara-2	GLYCOLYSIS	4.108739745713665	glycolysis I (from glucose-6P)
ribo	Ara+5	P4-PWY	4.108492793830987	superpathway of lysine, threonine and methionine biosynthesis I
rna	Ara-4	TCA-GLYOX-BYPASS	4.107934862945359	superpathway of glyoxylate bypass and TCA
rna	Ara+5	P4-PWY	4.106518551811156	superpathway of lysine, threonine and methionine biosynthesis I
rna	Ara-4	GLYOXYLATE-BYPASS	4.105442206265558	glyoxylate cycle
ribo	Ara-4	GLYOXYLATE-BYPASS	4.099365444175188	glyoxylate cycle
ribo	Ara+3	PWY0-1298	4.095357081142329	superpathway of pyrimidine deoxyribonucleosides degradation
rna	Ara+4	GLYCOLYSIS	4.09377437340833	glycolysis I (from glucose-6P)
rna	Ara+3	PWY0-1298	4.090190886693225	superpathway of pyrimidine deoxyribonucleosides degradation
ribo	Ara+5	FAO-PWY	4.057858879195976	fatty acid &beta;-oxidation I
rna	Ara-2	METSYN-PWY	4.05587974223759	homoserine and methionine biosynthesis
rna	Ara+3	FERMENTATION-PWY	4.038812977010949	mixed acid fermentation
ribo	Ara+2	PWY0-1313	4.037120215100736	acetate conversion to acetyl-CoA
ribo	Ara-4	PWY0-1313	4.020796029802676	acetate conversion to acetyl-CoA
ribo	Ara+3	FERMENTATION-PWY	3.9853844311296394	mixed acid fermentation
ribo	Ara-2	MET-SAM-PWY	3.980418062951702	superpathway of <i>S</i>-adenosyl-L-methionine biosynthesis
ribo	Ara+2	PWY-5837	3.962127783987053	1,4-dihydroxy-2-naphthoate biosynthesis I
ribo	Ara-4	GLUCONEO-PWY	3.9492656971834807	gluconeogenesis I
rna	Ara-4	GLUCONEO-PWY	3.9313067584742947	gluconeogenesis I
rna	Ara+5	FAO-PWY	3.9046852173973914	fatty acid &beta;-oxidation I
rna	Ara+2	PWY-5837	3.904349671703185	1,4-dihydroxy-2-naphthoate biosynthesis I
rna	Ara-2	MET-SAM-PWY	3.8886871606130633	superpathway of <i>S</i>-adenosyl-L-methionine biosynthesis
ribo	Ara+3	PWY-5837	3.8644421189429283	1,4-dihydroxy-2-naphthoate biosynthesis I
ribo	Ara-6	PWY-5837	3.861968931058377	1,4-dihydroxy-2-naphthoate biosynthesis I
rna	Ara+3	PWY-5837	3.8398537337695458	1,4-dihydroxy-2-naphthoate biosynthesis I
ribo	Ara-4	PWY-7187	3.8342156282129416	pyrimidine deoxyribonucleotides <i>de novo</i> biosynthesis II
ribo	Ara+2	PWY0-1471	3.8298230216805482	uracil degradation III
rna	Ara-6	PWY-5837	3.8288719397006115	1,4-dihydroxy-2-naphthoate biosynthesis I
ribo	Ara+3	KETOGLUCONMET-PWY	3.8225280992603383	ketogluconate metabolism
ribo	Ara-2	ACETOACETATE-DEG-PWY	3.817031999516384	acetoacetate degradation (to acetyl CoA)
rna	Ara-4	PWY-7187	3.814585976231461	pyrimidine deoxyribonucleotides <i>de novo</i> biosynthesis II
ribo	Ara-4	FAO-PWY	3.8109012324155804	fatty acid &beta;-oxidation I
ribo	Ara+5	ARO-PWY	3.7968165250750223	chorismate biosynthesis I
rna	Ara+3	KETOGLUCONMET-PWY	3.794908374632788	ketogluconate metabolism
rna	Ara-4	FAO-PWY	3.7930081251937753	fatty acid &beta;-oxidation I
rna	Ara+4	ARO-PWY	3.7919237891752746	chorismate biosynthesis I
rna	Ara+5	ARO-PWY	3.791726149145263	chorismate biosynthesis I
ribo	Ara+4	ARO-PWY	3.7873680454887606	chorismate biosynthesis I
ribo	Ara-4	PWY-7184	3.7327911979389374	pyrimidine deoxyribonucleotides <i>de novo</i> biosynthesis I
rna	Ara-4	PWY-7184	3.721211620439189	pyrimidine deoxyribonucleotides <i>de novo</i> biosynthesis I
rna	Ara+1	FERMENTATION-PWY	3.7007020546955913	mixed acid fermentation
ribo	Ara+1	FERMENTATION-PWY	3.6893296934607376	mixed acid fermentation
ribo	Ara-4	HEXITOLDEGSUPER-PWY	3.6710883049532623	superpathway of hexitol degradation (bacteria)
ribo	Ara+2	KDO-NAGLIPASYN-PWY	3.6691063645802098	superpathway of (KDO)<SUB>2</SUB>-lipid A biosynthesis
rna	Ara-4	HEXITOLDEGSUPER-PWY	3.660320205889936	superpathway of hexitol degradation (bacteria)
rna	Ara+4	PWY0-1313	3.6423984979694857	acetate conversion to acetyl-CoA
ribo	Ara+2	GLUTAMINDEG-PWY	3.6379962207967855	glutamine degradation I
ribo	Ara-3	ARGDEG-PWY	3.6314293051697146	superpathway of arginine, putrescine, and 4-aminobutyrate degradation
ribo	Ara+1	METHGLYUT-PWY	3.5912788912624722	superpathway of methylglyoxal degradation
rna	Ara+1	METHGLYUT-PWY	3.588272753324345	superpathway of methylglyoxal degradation
ribo	Ara-3	PENTOSE-P-PWY	3.5849757603319903	pentose phosphate pathway
ribo	Ara+4	GLYCOLYSIS-E-D	3.5827757600327206	superpathway of glycolysis and Entner-Doudoroff
rna	Ara+2	KDO-NAGLIPASYN-PWY	3.5785527453176336	superpathway of (KDO)<SUB>2</SUB>-lipid A biosynthesis
ribo	Ara+3	METHGLYUT-PWY	3.5714144207468377	superpathway of methylglyoxal degradation
ribo	Ara-2	GLYCOLYSIS-E-D	3.569425147764218	superpathway of glycolysis and Entner-Doudoroff
rna	Ara+3	METHGLYUT-PWY	3.5650234675710117	superpathway of methylglyoxal degradation
rna	Ara+1	METSYN-PWY	3.5602342746721787	homoserine and methionine biosynthesis
rna	Ara-2	GLYCOLYSIS-E-D	3.5593882031965265	superpathway of glycolysis and Entner-Doudoroff
rna	Ara-3	PENTOSE-P-PWY	3.5587871132915403	pentose phosphate pathway
ribo	Ara+1	METSYN-PWY	3.55768835684233	homoserine and methionine biosynthesis
rna	Ara-4	METHGLYUT-PWY	3.5508123014700876	superpathway of methylglyoxal degradation
ribo	Ara+3	PWY0-1277	3.550239956689181	3-phenylpropionate and 3-(3-hydroxyphenyl)propionate degradation
rna	Ara+1	PENTOSE-P-PWY	3.5501381338171423	pentose phosphate pathway
rna	Ara+4	GLYCOLYSIS-E-D	3.5479974404159527	superpathway of glycolysis and Entner-Doudoroff
rna	Ara+3	PWY0-1277	3.5477768910945335	3-phenylpropionate and 3-(3-hydroxyphenyl)propionate degradation
ribo	Ara-4	METHGLYUT-PWY	3.547704613902102	superpathway of methylglyoxal degradation
rna	Ara-6	3-HYDROXYPHENYLACETATE-DEGRADATION-PWY	3.5472109811002523	4-hydroxyphenylacetate degradation
ribo	Ara-6	3-HYDROXYPHENYLACETATE-DEGRADATION-PWY	3.545862571410105	4-hydroxyphenylacetate degradation
ribo	Ara+1	PENTOSE-P-PWY	3.545649844546029	pentose phosphate pathway
ribo	Ara-6	METSYN-PWY	3.544359700040447	homoserine and methionine biosynthesis
rna	Ara-6	METSYN-PWY	3.5400341818335024	homoserine and methionine biosynthesis
rna	Ara+4	GLYOXYLATE-BYPASS	3.540017467293737	glyoxylate cycle
rna	Ara+1	PWY-5340	3.5303656395727385	sulfate activation for sulfonation
rna	Ara+5	PWY0-781	3.5248724891736787	aspartate superpathway
ribo	Ara+5	PWY0-781	3.5076979551836915	aspartate superpathway
ribo	Ara-4	GLYCOLYSIS-TCA-GLYOX-BYPASS	3.4909416801160855	superpathway of glycolysis, pyruvate dehydrogenase, TCA, and glyoxylate bypass
rna	Ara-4	GLYCOLYSIS-TCA-GLYOX-BYPASS	3.4826207479497544	superpathway of glycolysis, pyruvate dehydrogenase, TCA, and glyoxylate bypass
ribo	Ara+4	GLYOXYLATE-BYPASS	3.4824660311752793	glyoxylate cycle
ribo	Ara-3	ORNARGDEG-PWY	3.4817817890299256	superpathway of arginine and ornithine degradation
ribo	Ara-3	P4-PWY	3.473164227886478	superpathway of lysine, threonine and methionine biosynthesis I
rna	Ara-3	ARGDEG-PWY	3.4666431575378978	superpathway of arginine, putrescine, and 4-aminobutyrate degradation
rna	Ara-3	P4-PWY	3.4522547085748627	superpathway of lysine, threonine and methionine biosynthesis I
ribo	Ara+4	PWY-6628	3.4199917673941376	superpathway of phenylalanine biosynthesis
rna	Ara+1	GLYCLEAV-PWY	3.4180754455919287	glycine cleavage
ribo	Ara-3	DAPLYSINESYN-PWY	3.4139738016731433	lysine biosynthesis I
ribo	Ara+1	PWY-5901	3.4127298333649216	2,3-dihydroxybenzoate biosynthesis
ribo	Ara-3	PWY0-522	3.410917252550941	lipoate salvage I
rna	Ara+4	PWY-6628	3.402652737427876	superpathway of phenylalanine biosynthesis
ribo	Ara+4	GLYCOLYSIS-TCA-GLYOX-BYPASS	3.3905729183952262	superpathway of glycolysis, pyruvate dehydrogenase, TCA, and glyoxylate bypass
ribo	Ara+3	P4-PWY	3.387919258159521	superpathway of lysine, threonine and methionine biosynthesis I
rna	Ara-3	DAPLYSINESYN-PWY	3.3868629863938957	lysine biosynthesis I
ribo	Ara+1	1CMET2-PWY	3.3834274462223126	formylTHF biosynthesis
ribo	Ara+1	GLYCLEAV-PWY	3.3833731906135123	glycine cleavage
rna	Ara+3	P4-PWY	3.383235084647877	superpathway of lysine, threonine and methionine biosynthesis I
rna	Ara+4	GLYCOLYSIS-TCA-GLYOX-BYPASS	3.374803467853677	superpathway of glycolysis, pyruvate dehydrogenase, TCA, and glyoxylate bypass
rna	Ara+5	DAPLYSINESYN-PWY	3.368971322681158	lysine biosynthesis I
ribo	Ara+5	PWY-6628	3.3651113358848392	superpathway of phenylalanine biosynthesis
ribo	Ara+5	DAPLYSINESYN-PWY	3.363676040671828	lysine biosynthesis I
rna	Ara+1	1CMET2-PWY	3.3622161287711756	formylTHF biosynthesis
rna	Ara+1	MET-SAM-PWY	3.356734276498327	superpathway of <i>S</i>-adenosyl-L-methionine biosynthesis
ribo	Ara+1	MET-SAM-PWY	3.3543383533790774	superpathway of <i>S</i>-adenosyl-L-methionine biosynthesis
rna	Ara+5	PWY-6628	3.3527457560767733	superpathway of phenylalanine biosynthesis
ribo	Ara-6	MET-SAM-PWY	3.3418089320525386	superpathway of <i>S</i>-adenosyl-L-methionine biosynthesis
rna	Ara+3	DAPLYSINESYN-PWY	3.341258411665283	lysine biosynthesis I
ribo	Ara+3	DAPLYSINESYN-PWY	3.3381164198042086	lysine biosynthesis I
rna	Ara-6	MET-SAM-PWY	3.3378518709605975	superpathway of <i>S</i>-adenosyl-L-methionine biosynthesis
ribo	Ara-3	GLYCOCAT-PWY	3.3310005584597673	glycogen degradation I
rna	Ara-3	ORNARGDEG-PWY	3.328346633989217	superpathway of arginine and ornithine degradation
ribo	Ara+2	PWY-5838	3.321223465064795	superpathway of menaquinol-8 biosynthesis I
rna	Ara-4	PWY-1269	3.304063107773853	CMP-KDO biosynthesis I
rna	Ara+2	PWY0-1313	3.2876278728520214	acetate conversion to acetyl-CoA
ribo	Ara+2	PWY0-1479	3.28117985709383	tRNA processing
rna	Ara+2	PWY-5838	3.2762932598575363	superpathway of menaquinol-8 biosynthesis I
rna	Ara+1	SO4ASSIM-PWY	3.266360117629221	sulfate reduction I (assimilatory)
ribo	Ara-5	NONMEVIPP-PWY	3.2654997501137557	methylerythritol phosphate pathway
ribo	Ara+5	PWY0-44	3.263141742027529	D-allose degradation
ribo	Ara+2	LPSSYN-PWY	3.2620328876142644	superpathway of lipopolysaccharide biosynthesis
ribo	Ara+3	PWY-5838	3.2518096841527933	superpathway of menaquinol-8 biosynthesis I
ribo	Ara-2	GLYCOCAT-PWY	3.249858321846919	glycogen degradation I
ribo	Ara+5	TCA-GLYOX-BYPASS	3.2497027012827053	superpathway of glyoxylate bypass and TCA
ribo	Ara-3	TCA	3.237847639488927	TCA cycle I (prokaryotic)
rna	Ara+2	PWY0-1479	3.234384052706881	tRNA processing
ribo	Ara-2	THISYN-PWY	3.232649649167764	superpathway of thiamin diphosphate biosynthesis I
ribo	Ara-6	PWY-5838	3.2315962123853206	superpathway of menaquinol-8 biosynthesis I
rna	Ara+5	TCA-GLYOX-BYPASS	3.2312828937931815	superpathway of glyoxylate bypass and TCA
rna	Ara+1	ARGDEG-PWY	3.2283968703262595	superpathway of arginine, putrescine, and 4-aminobutyrate degradation
rna	Ara+3	PWY-5838	3.224458738436622	superpathway of menaquinol-8 biosynthesis I
rna	Ara+1	TCA	3.223335444173264	TCA cycle I (prokaryotic)
rna	Ara-3	TCA	3.210712292606868	TCA cycle I (prokaryotic)
ribo	Ara+1	TCA	3.2083411226089544	TCA cycle I (prokaryotic)
rna	Ara-3	GLYCOCAT-PWY	3.2081130766173844	glycogen degradation I
ribo	Ara-3	COLANSYN-PWY	3.207496160859473	colanic acid building blocks biosynthesis
rna	Ara-4	PWY0-1313	3.20738403239695	acetate conversion to acetyl-CoA
rna	Ara-6	PWY-5838	3.2035882373564575	superpathway of menaquinol-8 biosynthesis I
ribo	Ara-4	TCA	3.1995745734300454	TCA cycle I (prokaryotic)
ribo	Ara-5	PWY0-1261	3.1960241479741236	anhydromuropeptides recycling
rna	Ara-3	COLANSYN-PWY	3.1958905432572133	colanic acid building blocks biosynthesis
rna	Ara-4	TCA	3.192739221856869	TCA cycle I (prokaryotic)
rna	Ara+5	PWY0-1261	3.192151030822875	anhydromuropeptides recycling
ribo	Ara+5	PWY0-1261	3.191284683649402	anhydromuropeptides recycling
rna	Ara+5	1CMET2-PWY	3.190140450691783	formylTHF biosynthesis
rna	Ara-2	COLANSYN-PWY	3.1843397772626147	colanic acid building blocks biosynthesis
ribo	Ara+5	1CMET2-PWY	3.1841193162505634	formylTHF biosynthesis
ribo	Ara+3	COLANSYN-PWY	3.183908748740767	colanic acid building blocks biosynthesis
ribo	Ara-4	COLANSYN-PWY	3.1831149202167386	colanic acid building blocks biosynthesis
rna	Ara-5	PWY0-1261	3.1823676060273267	anhydromuropeptides recycling
rna	Ara+3	COLANSYN-PWY	3.1822222719612356	colanic acid building blocks biosynthesis
rna	Ara+2	LPSSYN-PWY	3.1809925626138704	superpathway of lipopolysaccharide biosynthesis
rna	Ara-4	COLANSYN-PWY	3.178835200405832	colanic acid building blocks biosynthesis
ribo	Ara+4	COLANSYN-PWY	3.1785323198691864	colanic acid building blocks biosynthesis
rna	Ara-6	1CMET2-PWY	3.1774867213824436	formylTHF biosynthesis
ribo	Ara-6	1CMET2-PWY	3.1768018574093	formylTHF biosynthesis
ribo	Ara+1	ARGDEG-PWY	3.1755150632901077	superpathway of arginine, putrescine, and 4-aminobutyrate degradation
rna	Ara+4	PWY0-1261	3.172090080194157	anhydromuropeptides recycling
rna	Ara+4	COLANSYN-PWY	3.1713275985919704	colanic acid building blocks biosynthesis
rna	Ara+1	TCA-GLYOX-BYPASS	3.1707249127988604	superpathway of glyoxylate bypass and TCA
ribo	Ara+4	PWY0-1261	3.170303933392495	anhydromuropeptides recycling
rna	Ara-5	COLANSYN-PWY	3.169655020176042	colanic acid building blocks biosynthesis
rna	Ara-1	COLANSYN-PWY	3.168029775029468	colanic acid building blocks biosynthesis
ribo	Ara-2	COLANSYN-PWY	3.1674280538346213	colanic acid building blocks biosynthesis
ribo	Ara-5	COLANSYN-PWY	3.167134093534511	colanic acid building blocks biosynthesis
ribo	Ara-1	COLANSYN-PWY	3.166682647403417	colanic acid building blocks biosynthesis
ribo	Ara-4	GLYCOCAT-PWY	3.151078049212774	glycogen degradation I
rna	Ara-2	GLYCOCAT-PWY	3.1413127533262273	glycogen degradation I
ribo	Ara+1	TCA-GLYOX-BYPASS	3.135894438936916	superpathway of glyoxylate bypass and TCA
ribo	Ara-6	GLYCOCAT-PWY	3.128042510564857	glycogen degradation I
rna	Ara+1	ORNARGDEG-PWY	3.0976773633722274	superpathway of arginine and ornithine degradation
rna	Ara-2	THISYN-PWY	3.0923034240716722	superpathway of thiamin diphosphate biosynthesis I
ribo	Ara-3	TCA-GLYOX-BYPASS	3.072631672260934	superpathway of glyoxylate bypass and TCA
ribo	Ara+3	PWY0-1471	3.0702984819538153	uracil degradation III
rna	Ara-3	TCA-GLYOX-BYPASS	3.066789091187402	superpathway of glyoxylate bypass and TCA
ribo	Ara-3	FUC-RHAMCAT-PWY	3.065606309296045	superpathway of fucose and rhamnose degradation
ribo	Ara-5	GLYCOCAT-PWY	3.0544509372033826	glycogen degradation I
ribo	Ara-4	PHOSLIPSYN-PWY	3.0521207793895737	phospholipid biosynthesis I
rna	Ara-4	GLYCOCAT-PWY	3.0520922427719994	glycogen degradation I
rna	Ara-3	FUC-RHAMCAT-PWY	3.043203849024244	superpathway of fucose and rhamnose degradation
ribo	Ara+1	ORNARGDEG-PWY	3.0431767264234884	superpathway of arginine and ornithine degradation
ribo	Ara-4	THISYN-PWY	3.042923011586925	superpathway of thiamin diphosphate biosynthesis I
ribo	Ara-4	PWY-5484	3.0411279931276174	glycolysis II (from fructose-6P)
rna	Ara+5	PWY0-1313	3.0408227448939686	acetate conversion to acetyl-CoA
rna	Ara-4	THISYN-PWY	3.0369973712801994	superpathway of thiamin diphosphate biosynthesis I
ribo	Ara+5	PWY0-1471	3.0347101920495003	uracil degradation III
rna	Ara-4	PHOSLIPSYN-PWY	3.034576397876131	phospholipid biosynthesis I
rna	Ara-1	PWY-5484	3.033970465061941	glycolysis II (from fructose-6P)
rna	Ara-4	ANARESP1-PWY	3.0324544839328276	respiration (anaerobic)
ribo	Ara-5	PHOSLIPSYN-PWY	3.030068632284826	phospholipid biosynthesis I
ribo	Ara-1	PWY-5484	3.029682452953454	glycolysis II (from fructose-6P)
rna	Ara-5	PHOSLIPSYN-PWY	3.0287286395134316	phospholipid biosynthesis I
ribo	Ara+4	THISYN-PWY	3.0265478380519513	superpathway of thiamin diphosphate biosynthesis I
rna	Ara+4	THISYN-PWY	3.0260365901527595	superpathway of thiamin diphosphate biosynthesis I
rna	Ara-4	PWY-5484	3.0254303115099925	glycolysis II (from fructose-6P)
ribo	Ara+1	SO4ASSIM-PWY	3.00275140291171	sulfate reduction I (assimilatory)
ribo	Ara-4	PWY0-166	3.0015452152171815	superpathway of pyrimidine deoxyribonucleotides <i>de novo</i> biosynthesis (E. coli)
rna	Ara-4	PWY0-166	2.999349186159985	superpathway of pyrimidine deoxyribonucleotides <i>de novo</i> biosynthesis (E. coli)
ribo	Ara-2	GLYCOLYSIS-TCA-GLYOX-BYPASS	2.9949407248323396	superpathway of glycolysis, pyruvate dehydrogenase, TCA, and glyoxylate bypass
rna	Ara-3	ARG+POLYAMINE-SYN	2.989826065979686	superpathway of arginine and polyamine biosynthesis
ribo	Ara-3	PWY0-781	2.980623312909325	aspartate superpathway
rna	Ara-2	GLYCOLYSIS-TCA-GLYOX-BYPASS	2.978217424151264	superpathway of glycolysis, pyruvate dehydrogenase, TCA, and glyoxylate bypass
rna	Ara-3	PWY0-781	2.9728399404602266	aspartate superpathway
ribo	Ara-3	PWY-7247	2.9716365204315074	&beta;-D-glucuronide and D-glucuronate degradation
ribo	Ara+2	NONMEVIPP-PWY	2.96669135260072	methylerythritol phosphate pathway
rna	Ara+3	PWY0-781	2.9636569208221797	aspartate superpathway
rna	Ara-4	PWY-6772	2.9609459735711376	hydrogen production V
rna	Ara-5	GLYCOCAT-PWY	2.9600055537000904	glycogen degradation I
ribo	Ara-3	ARG+POLYAMINE-SYN	2.948621463643245	superpathway of arginine and polyamine biosynthesis
ribo	Ara-3	ANARESP1-PWY	2.942710237415503	respiration (anaerobic)
ribo	Ara-4	ANARESP1-PWY	2.9384543970892114	respiration (anaerobic)
ribo	Ara+3	PWY0-781	2.9336834167302652	aspartate superpathway
rna	Ara-3	ANARESP1-PWY	2.932522517479722	respiration (anaerobic)
ribo	Ara+4	ANARESP1-PWY	2.92917662474518	respiration (anaerobic)
ribo	Ara-2	ALANINE-SYN2-PWY	2.927256713012627	alanine biosynthesis II
rna	Ara-5	NONMEVIPP-PWY	2.9255155884979445	methylerythritol phosphate pathway
rna	Ara-1	ANARESP1-PWY	2.925206456908642	respiration (anaerobic)
rna	Ara-6	GLYCOCAT-PWY	2.9187572719352386	glycogen degradation I
ribo	Ara-1	ANARESP1-PWY	2.9171183981961533	respiration (anaerobic)
ribo	Ara-4	GLYCOLYSIS	2.911703614617391	glycolysis I (from glucose-6P)
rna	Ara+4	ANARESP1-PWY	2.910667987408508	respiration (anaerobic)
ribo	Ara+5	GLNSYN-PWY	2.9077825488010043	glutamine biosynthesis I
rna	Ara-1	GLYCOLYSIS	2.9060467783684447	glycolysis I (from glucose-6P)
ribo	Ara-1	GLYCOLYSIS	2.9013999582695296	glycolysis I (from glucose-6P)
rna	Ara+4	PWY-6629	2.899613263387197	superpathway of tryptophan biosynthesis
rna	Ara-4	GLYCOLYSIS	2.8968308937719396	glycolysis I (from glucose-6P)
ribo	Ara+4	PWY-6629	2.8940010109944683	superpathway of tryptophan biosynthesis
rna	Ara+2	GLNSYN-PWY	2.8784281852208933	glutamine biosynthesis I
ribo	Ara-2	GLUCONEO-PWY	2.8771787087541125	gluconeogenesis I
rna	Ara-1	GLYCOCAT-PWY	2.8641919969781102	glycogen degradation I
ribo	Ara-2	GLUTAMINDEG-PWY	2.859434122297633	glutamine degradation I
ribo	Ara+5	PWY-6629	2.857920746065321	superpathway of tryptophan biosynthesis
ribo	Ara-3	BRANCHED-CHAIN-AA-SYN-PWY	2.8565385154696186	superpathway of leucine, valine, and isoleucine biosynthesis
ribo	Ara+4	GLUCONEO-PWY	2.8551638296072426	gluconeogenesis I
rna	Ara-2	GLUCONEO-PWY	2.8530071444852507	gluconeogenesis I
ribo	Ara+1	PWY-5340	2.851098043142858	sulfate activation for sulfonation
rna	Ara+5	PWY-6629	2.8430468723258	superpathway of tryptophan biosynthesis
rna	Ara-3	BRANCHED-CHAIN-AA-SYN-PWY	2.8309273223505027	superpathway of leucine, valine, and isoleucine biosynthesis
ribo	Ara-1	GLYCOCAT-PWY	2.818603845061023	glycogen degradation I
ribo	Ara-2	P4-PWY	2.8135218642619413	superpathway of lysine, threonine and methionine biosynthesis I
rna	Ara+5	PWY0-44	2.812288856274365	D-allose degradation
rna	Ara+4	GLUCONEO-PWY	2.7947731727277745	gluconeogenesis I
ribo	Ara-6	GLUCONEO-PWY	2.7938098966698175	gluconeogenesis I
rna	Ara-6	GLUCONEO-PWY	2.7880829819683357	gluconeogenesis I
ribo	Ara-3	P2-PWY	2.779598749661608	citrate lyase activation
ribo	Ara-5	BRANCHED-CHAIN-AA-SYN-PWY	2.773806363847646	superpathway of leucine, valine, and isoleucine biosynthesis
rna	Ara-2	ALANINE-SYN2-PWY	2.7724856867230425	alanine biosynthesis II
rna	Ara+5	PWY-5340	2.7724113250488265	sulfate activation for sulfonation
rna	Ara-2	P4-PWY	2.767512060857276	superpathway of lysine, threonine and methionine biosynthesis I
rna	Ara+2	PWY0-1471	2.744796570132209	uracil degradation III
rna	Ara-5	BRANCHED-CHAIN-AA-SYN-PWY	2.7446868266289526	superpathway of leucine, valine, and isoleucine biosynthesis
rna	Ara+2	GLYCOCAT-PWY	2.7398722862914573	glycogen degradation I
rna	Ara-4	FERMENTATION-PWY	2.7247247666750947	mixed acid fermentation
rna	Ara+1	GLNSYN-PWY	2.7172233089355373	glutamine biosynthesis I
ribo	Ara+2	GLYCOCAT-PWY	2.6973410103061957	glycogen degradation I
rna	Ara-3	PWY0-522	2.6883779578698457	lipoate salvage I
rna	Ara+5	GLNSYN-PWY	2.6798253298130397	glutamine biosynthesis I
ribo	Ara-2	ALL-CHORISMATE-PWY	2.67123481410919	superpathway of chorismate metabolism
rna	Ara-2	ALL-CHORISMATE-PWY	2.653336994636731	superpathway of chorismate metabolism
ribo	Ara-3	FERMENTATION-PWY	2.6520357064821964	mixed acid fermentation
rna	Ara-3	KDO-NAGLIPASYN-PWY	2.6518771348357824	superpathway of (KDO)<SUB>2</SUB>-lipid A biosynthesis
ribo	Ara-3	KDO-NAGLIPASYN-PWY	2.651311967045289	superpathway of (KDO)<SUB>2</SUB>-lipid A biosynthesis
ribo	Ara+1	KDO-NAGLIPASYN-PWY	2.6462342817658535	superpathway of (KDO)<SUB>2</SUB>-lipid A biosynthesis
ribo	Ara-4	FERMENTATION-PWY	2.645480885812304	mixed acid fermentation
rna	Ara+1	ARG+POLYAMINE-SYN	2.6447770445005694	superpathway of arginine and polyamine biosynthesis
rna	Ara-2	ARGSYN-PWY	2.641212395328786	arginine biosynthesis I (via L-ornithine)
ribo	Ara+3	KDO-NAGLIPASYN-PWY	2.640946076386678	superpathway of (KDO)<SUB>2</SUB>-lipid A biosynthesis
ribo	Ara+3	PWY0-1507	2.6398885667404737	biotin biosynthesis from 8-amino-7-oxononanoate I
ribo	Ara+4	COMPLETE-ARO-PWY	2.6395480802180282	superpathway of phenylalanine, tyrosine, and tryptophan biosynthesis
rna	Ara+4	TCA-GLYOX-BYPASS	2.63745290589399	superpathway of glyoxylate bypass and TCA
rna	Ara-1	FERMENTATION-PWY	2.636766468245538	mixed acid fermentation
rna	Ara-3	FERMENTATION-PWY	2.6366738241023566	mixed acid fermentation
rna	Ara-4	ALL-CHORISMATE-PWY	2.635291519056514	superpathway of chorismate metabolism
ribo	Ara+1	ARG+POLYAMINE-SYN	2.628836358530907	superpathway of arginine and polyamine biosynthesis
ribo	Ara+4	FERMENTATION-PWY	2.6287524546844754	mixed acid fermentation
ribo	Ara-3	ALL-CHORISMATE-PWY	2.627611477620938	superpathway of chorismate metabolism
rna	Ara+1	KDO-NAGLIPASYN-PWY	2.623708954898199	superpathway of (KDO)<SUB>2</SUB>-lipid A biosynthesis
ribo	Ara-4	ALL-CHORISMATE-PWY	2.6214690781884142	superpathway of chorismate metabolism
rna	Ara+3	KDO-NAGLIPASYN-PWY	2.6203828303273875	superpathway of (KDO)<SUB>2</SUB>-lipid A biosynthesis
ribo	Ara+2	PWY0-1507	2.6197582164003714	biotin biosynthesis from 8-amino-7-oxononanoate I
ribo	Ara+4	TCA-GLYOX-BYPASS	2.6186315943891953	superpathway of glyoxylate bypass and TCA
ribo	Ara-1	FERMENTATION-PWY	2.6170997853721665	mixed acid fermentation
rna	Ara+4	COMPLETE-ARO-PWY	2.6146227979909384	superpathway of phenylalanine, tyrosine, and tryptophan biosynthesis
ribo	Ara-2	ARGSYN-PWY	2.6128932420918107	arginine biosynthesis I (via L-ornithine)
rna	Ara+4	FERMENTATION-PWY	2.611286317020936	mixed acid fermentation
rna	Ara-1	HEXITOLDEGSUPER-PWY	2.6021657574145416	superpathway of hexitol degradation (bacteria)
ribo	Ara-1	HEXITOLDEGSUPER-PWY	2.598674749917781	superpathway of hexitol degradation (bacteria)
rna	Ara-3	ALL-CHORISMATE-PWY	2.597096079234491	superpathway of chorismate metabolism
rna	Ara-2	GLUTORN-PWY	2.5833548848005625	ornithine biosynthesis
rna	Ara+1	GLYCOCAT-PWY	2.5732076085755318	glycogen degradation I
ribo	Ara-4	ALANINE-SYN2-PWY	2.544289090868894	alanine biosynthesis II
ribo	Ara+2	GLNSYN-PWY	2.542897169707635	glutamine biosynthesis I
ribo	Ara+1	GLUTAMINDEG-PWY	2.539803777764125	glutamine degradation I
rna	Ara+1	PYRIDNUCSYN-PWY	2.535038607008074	NAD biosynthesis I (from aspartate)
ribo	Ara-4	GLYCOLYSIS-E-D	2.5319425735908894	superpathway of glycolysis and Entner-Doudoroff
ribo	Ara+4	ACETATEUTIL-PWY	2.5272961245741508	superpathway of acetate utilization and formation
ribo	Ara-4	PWY-1269	2.527213262268752	CMP-KDO biosynthesis I
rna	Ara-1	GLYCOLYSIS-E-D	2.5206993441726424	superpathway of glycolysis and Entner-Doudoroff
ribo	Ara-2	GLUTORN-PWY	2.519148691144591	ornithine biosynthesis
ribo	Ara+5	COMPLETE-ARO-PWY	2.5190637976320134	superpathway of phenylalanine, tyrosine, and tryptophan biosynthesis
rna	Ara-4	GLYCOLYSIS-E-D	2.5140174990646806	superpathway of glycolysis and Entner-Doudoroff
ribo	Ara-1	GLYCOLYSIS-E-D	2.51385798678849	superpathway of glycolysis and Entner-Doudoroff
rna	Ara+5	COMPLETE-ARO-PWY	2.497260147321539	superpathway of phenylalanine, tyrosine, and tryptophan biosynthesis
ribo	Ara-6	PWY0-1313	2.4915797679267553	acetate conversion to acetyl-CoA
ribo	Ara-2	PWY0-781	2.485556170834309	aspartate superpathway
ribo	Ara+5	PWY0-1329	2.4699444524602283	succinate to cytochrome <i>bo</i> oxidase electron transfer
ribo	Ara+5	PWY0-1353	2.4699444524602283	succinate to cytochrome <i>bd</i> oxidase electron transfer
ribo	Ara+2	ACETATEUTIL-PWY	2.466599110873117	superpathway of acetate utilization and formation
ribo	Ara+2	AST-PWY	2.4530127632098475	arginine degradation II (AST pathway)
rna	Ara-2	PWY0-781	2.450387860563359	aspartate superpathway
ribo	Ara+1	GLYCOCAT-PWY	2.4476966929041497	glycogen degradation I
ribo	Ara-5	PWY-6608	2.4415624562269427	guanosine nucleotides degradation III
ribo	Ara-2	PWY0-1021	2.440022102985136	alanine biosynthesis III
ribo	Ara-2	SAM-PWY	2.439193467780628	S-adenosyl-L-methionine biosynthesis
rna	Ara+3	GLNSYN-PWY	2.430886105805422	glutamine biosynthesis I
rna	Ara+5	SO4ASSIM-PWY	2.4303477755130896	sulfate reduction I (assimilatory)
ribo	Ara-3	PWY0-1275	2.429087211522897	lipoate biosynthesis and incorporation II
rna	Ara+1	P4-PWY	2.417337256879842	superpathway of lysine, threonine and methionine biosynthesis I
ribo	Ara+1	P4-PWY	2.4097468753635085	superpathway of lysine, threonine and methionine biosynthesis I
ribo	Ara+1	PWY-7220	2.4096476941092555	adenosine deoxyribonucleotides <i>de novo</i> biosynthesis II
ribo	Ara+1	PWY-7222	2.4096476941092555	guanosine deoxyribonucleotides <i>de novo</i> biosynthesis II
rna	Ara+2	LCYSDEG-PWY	2.4018690147356905	L-cysteine degradation II
rna	Ara+1	LCYSDEG-PWY	2.4006249711788072	L-cysteine degradation II
rna	Ara+1	PWY0-781	2.397905037151234	aspartate superpathway
ribo	Ara+3	PWY0-1313	2.3965296093534736	acetate conversion to acetyl-CoA
ribo	Ara-4	ACETATEUTIL-PWY	2.3715574776991413	superpathway of acetate utilization and formation
ribo	Ara-6	P4-PWY	2.371216644077029	superpathway of lysine, threonine and methionine biosynthesis I
rna	Ara-6	P4-PWY	2.3696497818739752	superpathway of lysine, threonine and methionine biosynthesis I
ribo	Ara+1	GLNSYN-PWY	2.367956974352021	glutamine biosynthesis I
ribo	Ara-3	LCYSDEG-PWY	2.3590702263480057	L-cysteine degradation II
rna	Ara+5	PWY0-1329	2.351316467713203	succinate to cytochrome <i>bo</i> oxidase electron transfer
rna	Ara+5	PWY0-1353	2.351316467713203	succinate to cytochrome <i>bd</i> oxidase electron transfer
rna	Ara+1	SULFATE-CYS-PWY	2.350458237127901	superpathway of sulfate assimilation and cysteine biosynthesis
rna	Ara+4	GLYCOL-GLYOXDEG-PWY	2.345219514987115	superpathway of glycol metabolism and degradation
ribo	Ara+1	LPSSYN-PWY	2.342491798637303	superpathway of lipopolysaccharide biosynthesis
ribo	Ara+3	LPSSYN-PWY	2.337122099617003	superpathway of lipopolysaccharide biosynthesis
ribo	Ara+1	PWY0-781	2.334424020235943	aspartate superpathway
ribo	Ara-3	PWY0-1221	2.3334797638280835	putrescine degradation II
rna	Ara+1	LPSSYN-PWY	2.332205790072811	superpathway of lipopolysaccharide biosynthesis
rna	Ara+3	PWY0-1507	2.3292169211110556	biotin biosynthesis from 8-amino-7-oxononanoate I
rna	Ara+3	LPSSYN-PWY	2.328111378827176	superpathway of lipopolysaccharide biosynthesis
ribo	Ara+5	GLYCOLYSIS-TCA-GLYOX-BYPASS	2.3258919571648162	superpathway of glycolysis, pyruvate dehydrogenase, TCA, and glyoxylate bypass
ribo	Ara-3	LPSSYN-PWY	2.3234945721975033	superpathway of lipopolysaccharide biosynthesis
rna	Ara-3	LPSSYN-PWY	2.323062357619483	superpathway of lipopolysaccharide biosynthesis
ribo	Ara+1	SERDEG-PWY	2.309609132239725	L-serine degradation
rna	Ara+5	GLYCOLYSIS-TCA-GLYOX-BYPASS	2.2993916807072923	superpathway of glycolysis, pyruvate dehydrogenase, TCA, and glyoxylate bypass
ribo	Ara+1	PYRIDNUCSYN-PWY	2.2988202427647977	NAD biosynthesis I (from aspartate)
rna	Ara+1	PWY-5901	2.2983309636917055	2,3-dihydroxybenzoate biosynthesis
ribo	Ara-1	PWY-1269	2.2897875279584943	CMP-KDO biosynthesis I
ribo	Ara-2	GLUTAMINEFUM-PWY	2.2722871664043525	glutamine degradation II
ribo	Ara-2	GLUTSYN-PWY	2.2722871664043525	glutamate biosynthesis I
ribo	Ara-2	GLUTSYNIII-PWY	2.2722871664043525	glutamate biosynthesis III
rna	Ara-6	PWY0-781	2.2683845844589907	aspartate superpathway
ribo	Ara-3	TRNA-CHARGING-PWY	2.2674402543042445	tRNA charging
ribo	Ara+1	TRNA-CHARGING-PWY	2.2620983239087273	tRNA charging
rna	Ara+1	TRNA-CHARGING-PWY	2.2588488742324997	tRNA charging
rna	Ara-3	TRNA-CHARGING-PWY	2.256467564701172	tRNA charging
ribo	Ara+4	GLYCOL-GLYOXDEG-PWY	2.253372525009429	superpathway of glycol metabolism and degradation
rna	Ara-1	PWY0-1306	2.252125511716236	L-galactonate degradation
rna	Ara-4	ALANINE-SYN2-PWY	2.249414091345053	alanine biosynthesis II
rna	Ara+2	AMMASSIM-PWY	2.2426686277377996	ammonia assimilation cycle III
ribo	Ara+4	GLYCLEAV-PWY	2.242182180214386	glycine cleavage
ribo	Ara-3	GLYCOLYSIS-TCA-GLYOX-BYPASS	2.2388528169775617	superpathway of glycolysis, pyruvate dehydrogenase, TCA, and glyoxylate bypass
rna	Ara-6	PWY0-1313	2.233508214287406	acetate conversion to acetyl-CoA
ribo	Ara-6	PWY0-781	2.22597646328917	aspartate superpathway
rna	Ara-3	GLYCOLYSIS-TCA-GLYOX-BYPASS	2.2246308680839366	superpathway of glycolysis, pyruvate dehydrogenase, TCA, and glyoxylate bypass
rna	Ara-2	PWY-7220	2.220628501939358	adenosine deoxyribonucleotides <i>de novo</i> biosynthesis II
rna	Ara-2	PWY-7222	2.220628501939358	guanosine deoxyribonucleotides <i>de novo</i> biosynthesis II
rna	Ara+2	ANARESP1-PWY	2.21439232540757	respiration (anaerobic)
rna	Ara+1	GLYCOLYSIS-TCA-GLYOX-BYPASS	2.2128751816957335	superpathway of glycolysis, pyruvate dehydrogenase, TCA, and glyoxylate bypass
ribo	Ara-3	4AMINOBUTMETAB-PWY	2.1983143012124042	superpathway of 4-aminobutyrate degradation
ribo	Ara+1	GLYCOLYSIS-TCA-GLYOX-BYPASS	2.194404576841205	superpathway of glycolysis, pyruvate dehydrogenase, TCA, and glyoxylate bypass
ribo	Ara+2	ANARESP1-PWY	2.193691196668926	respiration (anaerobic)
rna	Ara+4	GLYCLEAV-PWY	2.187233238985497	glycine cleavage
rna	Ara+1	SERDEG-PWY	2.1870995241565137	L-serine degradation
rna	Ara-3	LCYSDEG-PWY	2.186930247035483	L-cysteine degradation II
ribo	Ara-5	SALVADEHYPOX-PWY	2.1821001984324173	adenosine nucleotides degradation II
ribo	Ara+3	GLNSYN-PWY	2.1674450850831515	glutamine biosynthesis I
ribo	Ara-2	LCYSDEG-PWY	2.156927997128875	L-cysteine degradation II
rna	Ara+5	PWY0-1471	2.154806347026305	uracil degradation III
rna	Ara+4	PWY-1269	2.148473016198215	CMP-KDO biosynthesis I
ribo	Ara-3	PWY-5965	2.14828372902086	fatty acid biosynthesis initiation III
ribo	Ara-3	PWY-6537	2.145810720235407	4-aminobutyrate degradation II
rna	Ara+2	PWY0-1507	2.1451779307873404	biotin biosynthesis from 8-amino-7-oxononanoate I
rna	Ara+4	ACETATEUTIL-PWY	2.1433132281379352	superpathway of acetate utilization and formation
rna	Ara-6	PYRIDNUCSYN-PWY	2.142752670210413	NAD biosynthesis I (from aspartate)
ribo	Ara+1	SULFATE-CYS-PWY	2.1351084952974118	superpathway of sulfate assimilation and cysteine biosynthesis
ribo	Ara+5	SO4ASSIM-PWY	2.1315203039714623	sulfate reduction I (assimilatory)
ribo	Ara-2	ARG+POLYAMINE-SYN	2.1277959799436967	superpathway of arginine and polyamine biosynthesis
ribo	Ara-6	PWY-1269	2.126412052325626	CMP-KDO biosynthesis I
rna	Ara+2	AST-PWY	2.12381429632489	arginine degradation II (AST pathway)
ribo	Ara-3	PWY0-1305	2.1233978176670565	glutamate dependent acid resistance
rna	Ara-2	SAM-PWY	2.12030814508314	S-adenosyl-L-methionine biosynthesis
rna	Ara-2	GLUTAMINDEG-PWY	2.114584412014081	glutamine degradation I
ribo	Ara+5	PWY-7220	2.1043086564809035	adenosine deoxyribonucleotides <i>de novo</i> biosynthesis II
ribo	Ara+5	PWY-7222	2.1043086564809035	guanosine deoxyribonucleotides <i>de novo</i> biosynthesis II
rna	Ara-2	ARG+POLYAMINE-SYN	2.1039681216256114	superpathway of arginine and polyamine biosynthesis
ribo	Ara+5	PWY-5340	2.0934781263409055	sulfate activation for sulfonation
ribo	Ara+5	AMMASSIM-PWY	2.0899423835764694	ammonia assimilation cycle III
rna	Ara+1	GLYOXDEG-PWY	2.085739655322326	glycolate and glyoxylate degradation II
ribo	Ara-3	ORNDEG-PWY	2.0838336265755664	superpathway of ornithine degradation
rna	Ara+2	HEXITOLDEGSUPER-PWY	2.081609985808472	superpathway of hexitol degradation (bacteria)
ribo	Ara-2	PWY-7220	2.078607237782159	adenosine deoxyribonucleotides <i>de novo</i> biosynthesis II
ribo	Ara-2	PWY-7222	2.078607237782159	guanosine deoxyribonucleotides <i>de novo</i> biosynthesis II
rna	Ara-1	GLYCOLYSIS-TCA-GLYOX-BYPASS	2.0706335108751586	superpathway of glycolysis, pyruvate dehydrogenase, TCA, and glyoxylate bypass
ribo	Ara-1	GLYCOLYSIS-TCA-GLYOX-BYPASS	2.058794410428917	superpathway of glycolysis, pyruvate dehydrogenase, TCA, and glyoxylate bypass
ribo	Ara+2	LCYSDEG-PWY	2.056781041512821	L-cysteine degradation II
rna	Ara+1	AMMASSIM-PWY	2.0489582480890802	ammonia assimilation cycle III
rna	Ara-3	PWY0-1221	2.0477975594871682	putrescine degradation II
rna	Ara-2	LCYSDEG-PWY	2.0470941803729445	L-cysteine degradation II
ribo	Ara-3	GLUCONSUPER-PWY	2.0436205569243424	D-gluconate degradation
ribo	Ara+2	FERMENTATION-PWY	2.035792769329731	mixed acid fermentation
ribo	Ara+5	PWY0-1507	2.029825131960669	biotin biosynthesis from 8-amino-7-oxononanoate I
ribo	Ara-3	PUTDEG-PWY	2.0251469719261186	putrescine degradation I
rna	Ara+2	FERMENTATION-PWY	2.024019829396859	mixed acid fermentation
ribo	Ara-3	PWY-6535	2.0188089407179435	4-aminobutyrate degradation
ribo	Ara-2	PWY-5148	2.0164112018185603	acyl-CoA hydrolysis
ribo	Ara+4	GLUCONSUPER-PWY	2.008396820487431	D-gluconate degradation
rna	Ara+3	PWY0-1471	2.006971745934713	uracil degradation III
rna	Ara-2	GLYSYN-PWY	1.999131612983236	glycine biosynthesis I
ribo	Ara-3	HOMOSER-THRESYN-PWY	1.9961740340876473	threonine biosynthesis from homoserine
rna	Ara-1	PWY-5453	1.9953455967456306	methylglyoxal degradation III
ribo	Ara+1	LCYSDEG-PWY	1.9927649709084845	L-cysteine degradation II
rna	Ara+2	ACETATEUTIL-PWY	1.99111870754562	superpathway of acetate utilization and formation
rna	Ara+3	PWY0-1313	1.9902928652755243	acetate conversion to acetyl-CoA
ribo	Ara+4	PWY0-1507	1.9881199694860732	biotin biosynthesis from 8-amino-7-oxononanoate I
rna	Ara-3	PWY-6537	1.9688566491821193	4-aminobutyrate degradation II
rna	Ara-5	PWY0-1329	1.9678272222156992	succinate to cytochrome <i>bo</i> oxidase electron transfer
rna	Ara-5	PWY0-1353	1.9678272222156992	succinate to cytochrome <i>bd</i> oxidase electron transfer
rna	Ara-3	PWY-5965	1.9673858851739183	fatty acid biosynthesis initiation III
rna	Ara-2	GLUTAMINEFUM-PWY	1.9587197065822544	glutamine degradation II
rna	Ara-2	GLUTSYN-PWY	1.9587197065822544	glutamate biosynthesis I
rna	Ara-2	GLUTSYNIII-PWY	1.9587197065822544	glutamate biosynthesis III
ribo	Ara+4	PWY0-42	1.9568293826161527	2-methylcitrate cycle I
ribo	Ara+2	GLUTORN-PWY	1.9535674013741595	ornithine biosynthesis
ribo	Ara+1	PWY0-166	1.9461170923050617	superpathway of pyrimidine deoxyribonucleotides <i>de novo</i> biosynthesis (E. coli)
ribo	Ara-6	PYRIDNUCSYN-PWY	1.9432341033408964	NAD biosynthesis I (from aspartate)
ribo	Ara+2	AMMASSIM-PWY	1.9382275029119882	ammonia assimilation cycle III
ribo	Ara+2	HEXITOLDEGSUPER-PWY	1.9341742336910204	superpathway of hexitol degradation (bacteria)
rna	Ara+5	AMMASSIM-PWY	1.9320879890549898	ammonia assimilation cycle III
rna	Ara-4	ACETATEUTIL-PWY	1.929072139790407	superpathway of acetate utilization and formation
rna	Ara-1	PYRIDNUCSYN-PWY	1.92641750007874	NAD biosynthesis I (from aspartate)
rna	Ara-3	GLUTORN-PWY	1.9217983264010476	ornithine biosynthesis
ribo	Ara+2	ARGSYN-PWY	1.9209408999083661	arginine biosynthesis I (via L-ornithine)
ribo	Ara+5	PWY0-1317	1.9199900962183531	L-lactaldehyde degradation (aerobic)
rna	Ara+3	ANARESP1-PWY	1.9199232337800238	respiration (anaerobic)
rna	Ara+5	GLYCOCAT-PWY	1.9184659674203544	glycogen degradation I
ribo	Ara+1	GLYOXDEG-PWY	1.909427058363816	glycolate and glyoxylate degradation II
rna	Ara-1	PWY-1269	1.9070678943410664	CMP-KDO biosynthesis I
rna	Ara-3	PWY0-1275	1.900994002160868	lipoate biosynthesis and incorporation II
ribo	Ara+5	GLYCOCAT-PWY	1.9008025274271434	glycogen degradation I
ribo	Ara-3	IDNCAT-PWY	1.8986217014751317	L-idonate degradation
ribo	Ara+1	PWY-6126	1.89557689313241	superpathway of adenosine nucleotides <i>de novo</i> biosynthesis II
rna	Ara-3	ARGSYN-PWY	1.8935748171805016	arginine biosynthesis I (via L-ornithine)
rna	Ara+1	PWY-7220	1.8872994730121726	adenosine deoxyribonucleotides <i>de novo</i> biosynthesis II
rna	Ara+1	PWY-7222	1.8872994730121726	guanosine deoxyribonucleotides <i>de novo</i> biosynthesis II
rna	Ara+2	ILEUSYN-PWY	1.8863858989505455	isoleucine biosynthesis I (from threonine)
rna	Ara-2	PWY-5148	1.8857177449627385	acyl-CoA hydrolysis
rna	Ara-3	4AMINOBUTMETAB-PWY	1.88309561580167	superpathway of 4-aminobutyrate degradation
rna	Ara-4	LCYSDEG-PWY	1.8823721645667797	L-cysteine degradation II
rna	Ara-4	PWY-1801	1.8814185137520274	formaldehyde oxidation II (glutathione-dependent)
rna	Ara+2	ARGSYN-PWY	1.8750766970290262	arginine biosynthesis I (via L-ornithine)
rna	Ara+3	AMMASSIM-PWY	1.8699765830836772	ammonia assimilation cycle III
ribo	Ara+3	PWY-4261	1.8690335636661415	glycerol degradation I
rna	Ara+2	VALSYN-PWY	1.8541960753977218	valine biosynthesis
rna	Ara+2	GLUTORN-PWY	1.8538985580373635	ornithine biosynthesis
ribo	Ara+1	PWY-7184	1.8538029781941796	pyrimidine deoxyribonucleotides <i>de novo</i> biosynthesis I
ribo	Ara+3	BIOTIN-BIOSYNTHESIS-PWY	1.8441739801205237	biotin biosynthesis I
rna	Ara-3	HOMOSER-THRESYN-PWY	1.8412830018596655	threonine biosynthesis from homoserine
rna	Ara-1	GLNSYN-PWY	1.8400030759196824	glutamine biosynthesis I
ribo	Ara-3	GLUTAMINDEG-PWY	1.8366591684592783	glutamine degradation I
ribo	Ara-3	GLUTAMINEFUM-PWY	1.8366591684592783	glutamine degradation II
ribo	Ara-3	GLUTSYN-PWY	1.8366591684592783	glutamate biosynthesis I
ribo	Ara-3	GLUTSYNIII-PWY	1.8366591684592783	glutamate biosynthesis III
rna	Ara-2	PWY-1269	1.8366381393674207	CMP-KDO biosynthesis I
ribo	Ara+2	PWY0-42	1.8339351603451293	2-methylcitrate cycle I
ribo	Ara-2	GLYSYN-PWY	1.8306324417092756	glycine biosynthesis I
rna	Ara+5	ACETATEUTIL-PWY	1.8240600813786054	superpathway of acetate utilization and formation
rna	Ara+2	PWY-1801	1.8203733803813698	formaldehyde oxidation II (glutathione-dependent)
ribo	Ara-3	PWY-7446	1.8188385578388424	sulfoglycolysis
ribo	Ara+1	PRPP-PWY	1.8137716720943478	superpathway of histidine, purine, and pyrimidine biosynthesis
ribo	Ara+4	GLUTAMINDEG-PWY	1.8073035856065185	glutamine degradation I
ribo	Ara+4	GLUTAMINEFUM-PWY	1.8073035856065185	glutamine degradation II
ribo	Ara+4	GLUTSYN-PWY	1.8073035856065185	glutamate biosynthesis I
ribo	Ara+4	GLUTSYNIII-PWY	1.8073035856065185	glutamate biosynthesis III
ribo	Ara-1	PWY-5453	1.8060821963712104	methylglyoxal degradation III
rna	Ara+1	GLYOXYLATE-BYPASS	1.8060381602537419	glyoxylate cycle
ribo	Ara-3	TRYPDEG-PWY	1.8022304790119947	tryptophan degradation II (via pyruvate)
ribo	Ara-2	GLYOXDEG-PWY	1.8004615082037543	glycolate and glyoxylate degradation II
ribo	Ara-2	THREONINE-DEG2-PWY	1.7992302497986474	threonine degradation II
rna	Ara-3	PWY0-1527	1.7987046574850591	curcumin degradation
ribo	Ara+5	PWY0-1348	1.7971045675355537	NADH to dimethyl sulfoxide electron transfer
ribo	Ara+5	PWY0-1356	1.7971045675355537	formate to dimethyl sulfoxide electron transfer
rna	Ara-2	GLYOXDEG-PWY	1.7970365009537879	glycolate and glyoxylate degradation II
ribo	Ara-3	ARGSYN-PWY	1.7929662595983502	arginine biosynthesis I (via L-ornithine)
ribo	Ara-3	GLUTORN-PWY	1.7912842548948131	ornithine biosynthesis
ribo	Ara+2	BIOTIN-BIOSYNTHESIS-PWY	1.7905363260738338	biotin biosynthesis I
ribo	Ara+4	PWY-1269	1.7862919846956207	CMP-KDO biosynthesis I
ribo	Ara+3	ANARESP1-PWY	1.7819942688804544	respiration (anaerobic)
rna	Ara-2	PWY0-166	1.774596601161233	superpathway of pyrimidine deoxyribonucleotides <i>de novo</i> biosynthesis (E. coli)
ribo	Ara+1	AMMASSIM-PWY	1.7700369930970783	ammonia assimilation cycle III
ribo	Ara+4	TYRSYN	1.7657933438274163	tyrosine biosynthesis I
ribo	Ara+1	PWY-6125	1.7656747485162503	superpathway of guanosine nucleotides <i>de novo</i> biosynthesis II
rna	Ara-5	PWY-6608	1.7643596374864123	guanosine nucleotides degradation III
rna	Ara-3	PWY-6535	1.7622784624269479	4-aminobutyrate degradation
rna	Ara-3	ORNDEG-PWY	1.7620787295317095	superpathway of ornithine degradation
rna	Ara+5	PWY0-1507	1.755138958036	biotin biosynthesis from 8-amino-7-oxononanoate I
rna	Ara+3	PWY0-1527	1.7547222633326038	curcumin degradation
ribo	Ara-3	PRPP-PWY	1.7541724295013734	superpathway of histidine, purine, and pyrimidine biosynthesis
rna	Ara+5	PWY-7220	1.7495336018902992	adenosine deoxyribonucleotides <i>de novo</i> biosynthesis II
rna	Ara+5	PWY-7222	1.7495336018902992	guanosine deoxyribonucleotides <i>de novo</i> biosynthesis II
rna	Ara-4	PYRIDNUCSYN-PWY	1.747746940509443	NAD biosynthesis I (from aspartate)
rna	Ara+5	ANARESP1-PWY	1.7433348661189756	respiration (anaerobic)
rna	Ara-1	GLYCLEAV-PWY	1.7426617772065816	glycine cleavage
rna	Ara+3	GLYCOCAT-PWY	1.7382666480096818	glycogen degradation I
rna	Ara-3	PRPP-PWY	1.7380636896532107	superpathway of histidine, purine, and pyrimidine biosynthesis
rna	Ara+2	GLUTAMINDEG-PWY	1.737879686589514	glutamine degradation I
rna	Ara-4	KDO-NAGLIPASYN-PWY	1.737624638641526	superpathway of (KDO)<SUB>2</SUB>-lipid A biosynthesis
ribo	Ara-3	SO4ASSIM-PWY	1.7364327434291935	sulfate reduction I (assimilatory)
ribo	Ara+3	LEUSYN-PWY	1.7344369700481355	leucine biosynthesis
ribo	Ara+2	ILEUSYN-PWY	1.7241006335028184	isoleucine biosynthesis I (from threonine)
ribo	Ara+5	ANARESP1-PWY	1.7228278461072528	respiration (anaerobic)
ribo	Ara-2	PWY-1269	1.7158339353374965	CMP-KDO biosynthesis I
ribo	Ara-3	PWY0-1507	1.7154595929105643	biotin biosynthesis from 8-amino-7-oxononanoate I
rna	Ara+1	CYSTSYN-PWY	1.7151494127537208	cysteine biosynthesis I
rna	Ara+5	PWY0-1317	1.7063725212624585	L-lactaldehyde degradation (aerobic)
ribo	Ara-2	HOMOSERSYN-PWY	1.7012094548306493	homoserine biosynthesis
rna	Ara+2	CYSTSYN-PWY	1.6983844662717336	cysteine biosynthesis I
rna	Ara-3	SO4ASSIM-PWY	1.697926568679761	sulfate reduction I (assimilatory)
rna	Ara+1	PRPP-PWY	1.6977289964113056	superpathway of histidine, purine, and pyrimidine biosynthesis
rna	Ara+5	SULFATE-CYS-PWY	1.6969065988875494	superpathway of sulfate assimilation and cysteine biosynthesis
rna	Ara+5	PWY-5084	1.6953910802110603	2-oxoglutarate decarboxylation to succinyl-CoA
rna	Ara+3	GLYCLEAV-PWY	1.6910095794358877	glycine cleavage
ribo	Ara+3	PWY0-1299	1.6867719058069264	arginine dependent acid resistance
ribo	Ara-3	PWY-7220	1.6863884880981703	adenosine deoxyribonucleotides <i>de novo</i> biosynthesis II
ribo	Ara-3	PWY-7222	1.6863884880981703	guanosine deoxyribonucleotides <i>de novo</i> biosynthesis II
rna	Ara-2	PWY-6126	1.684424728677814	superpathway of adenosine nucleotides <i>de novo</i> biosynthesis II
rna	Ara-2	PWY0-1021	1.6816431134013716	alanine biosynthesis III
ribo	Ara+1	GLYOXYLATE-BYPASS	1.677600395140023	glyoxylate cycle
rna	Ara+4	GLUCONSUPER-PWY	1.673636413490024	D-gluconate degradation
ribo	Ara+3	ACETATEUTIL-PWY	1.6732981703850256	superpathway of acetate utilization and formation
ribo	Ara+3	GLYCOCAT-PWY	1.6683747339390729	glycogen degradation I
rna	Ara-2	PWY-7184	1.6683476359158032	pyrimidine deoxyribonucleotides <i>de novo</i> biosynthesis I
ribo	Ara-3	CYSTSYN-PWY	1.6682209431841706	cysteine biosynthesis I
ribo	Ara+5	PWY0-166	1.656421972567638	superpathway of pyrimidine deoxyribonucleotides <i>de novo</i> biosynthesis (E. coli)
ribo	Ara-2	PWY0-166	1.6546231755619059	superpathway of pyrimidine deoxyribonucleotides <i>de novo</i> biosynthesis (E. coli)
ribo	Ara-4	GLUTAMINDEG-PWY	1.651476389156572	glutamine degradation I
rna	Ara+3	LEUSYN-PWY	1.6496488959265634	leucine biosynthesis
ribo	Ara+2	VALSYN-PWY	1.642255720807418	valine biosynthesis
rna	Ara+4	PWY0-42	1.6419948288664086	2-methylcitrate cycle I
rna	Ara-1	PWY-4261	1.641321224743127	glycerol degradation I
rna	Ara+2	PYRIDNUCSYN-PWY	1.640924155973877	NAD biosynthesis I (from aspartate)
rna	Ara+3	PANTO-PWY	1.6307355254095897	phosphopantothenate biosynthesis I
rna	Ara-2	HOMOSERSYN-PWY	1.6307000856354101	homoserine biosynthesis
ribo	Ara-4	PYRIDNUCSYN-PWY	1.6298423642279667	NAD biosynthesis I (from aspartate)
ribo	Ara+3	ALL-CHORISMATE-PWY	1.6281393315351282	superpathway of chorismate metabolism
ribo	Ara-2	AMMASSIM-PWY	1.6278222664420166	ammonia assimilation cycle III
rna	Ara-6	PWY-5659	1.626320066704253	GDP-mannose biosynthesis
rna	Ara-2	PWY-6125	1.6225525191982593	superpathway of guanosine nucleotides <i>de novo</i> biosynthesis II
ribo	Ara-2	DETOX1-PWY	1.6221101447558262	superoxide radicals degradation
ribo	Ara+4	ALL-CHORISMATE-PWY	1.6203225534744474	superpathway of chorismate metabolism
ribo	Ara+3	AMMASSIM-PWY	1.6150068172465954	ammonia assimilation cycle III
rna	Ara+2	BRANCHED-CHAIN-AA-SYN-PWY	1.6120418717701597	superpathway of leucine, valine, and isoleucine biosynthesis
rna	Ara+3	ALL-CHORISMATE-PWY	1.607935330450336	superpathway of chorismate metabolism
rna	Ara+4	ALL-CHORISMATE-PWY	1.6063204880299722	superpathway of chorismate metabolism
ribo	Ara-2	GLYOXYLATE-BYPASS	1.6057579983983497	glyoxylate cycle
ribo	Ara-3	GLUCOSE1PMETAB-PWY	1.600027781632984	glucose and glucose-1-phosphate degradation
ribo	Ara+2	ALL-CHORISMATE-PWY	1.5996717665651243	superpathway of chorismate metabolism
ribo	Ara-2	PWY-6126	1.5986959145898831	superpathway of adenosine nucleotides <i>de novo</i> biosynthesis II
ribo	Ara+5	PWY-6126	1.5924658742388538	superpathway of adenosine nucleotides <i>de novo</i> biosynthesis II
rna	Ara-5	SALVADEHYPOX-PWY	1.5883225133819534	adenosine nucleotides degradation II
ribo	Ara-2	TYRSYN	1.5835334826568304	tyrosine biosynthesis I
ribo	Ara+4	BSUBPOLYAMSYN-PWY	1.5822850333682552	spermidine biosynthesis I
rna	Ara-3	P2-PWY	1.5783638299772274	citrate lyase activation
ribo	Ara+5	FERMENTATION-PWY	1.5781456338458817	mixed acid fermentation
rna	Ara+5	FERMENTATION-PWY	1.5767234840321283	mixed acid fermentation
rna	Ara-1	PWY-5686	1.5759957824647064	UMP biosynthesis
ribo	Ara-1	PYRIDNUCSYN-PWY	1.5756010575115624	NAD biosynthesis I (from aspartate)
ribo	Ara+1	PWY0-1021	1.5755162165691057	alanine biosynthesis III
rna	Ara-3	PWY-7220	1.574797784802218	adenosine deoxyribonucleotides <i>de novo</i> biosynthesis II
rna	Ara-3	PWY-7222	1.574797784802218	guanosine deoxyribonucleotides <i>de novo</i> biosynthesis II
ribo	Ara+2	PWY-1801	1.5714969360754556	formaldehyde oxidation II (glutathione-dependent)
ribo	Ara-1	PWY0-1329	1.5666736339224765	succinate to cytochrome <i>bo</i> oxidase electron transfer
ribo	Ara-1	PWY0-1353	1.5666736339224765	succinate to cytochrome <i>bd</i> oxidase electron transfer
rna	Ara+2	ALL-CHORISMATE-PWY	1.5639518311763616	superpathway of chorismate metabolism
ribo	Ara-1	SO4ASSIM-PWY	1.559595763793009	sulfate reduction I (assimilatory)
ribo	Ara+4	PHESYN	1.5585243369077675	phenylalanine biosynthesis I
ribo	Ara+3	PWY-6519	1.5581647838790358	8-amino-7-oxononanoate biosynthesis I
ribo	Ara-4	LCYSDEG-PWY	1.5579832285438762	L-cysteine degradation II
rna	Ara-2	THREONINE-DEG2-PWY	1.5550293435507638	threonine degradation II
ribo	Ara+5	ALL-CHORISMATE-PWY	1.5542570543986824	superpathway of chorismate metabolism
ribo	Ara+2	PWY0-1527	1.5524873590775297	curcumin degradation
rna	Ara-4	LPSSYN-PWY	1.551386773492596	superpathway of lipopolysaccharide biosynthesis
rna	Ara-3	CYSTSYN-PWY	1.549623030496436	cysteine biosynthesis I
ribo	Ara-1	PWY0-1348	1.5492261643220289	NADH to dimethyl sulfoxide electron transfer
ribo	Ara-1	PWY0-1356	1.5492261643220289	formate to dimethyl sulfoxide electron transfer
ribo	Ara+2	PYRIDNUCSYN-PWY	1.5490975168784813	NAD biosynthesis I (from aspartate)
ribo	Ara+3	GLYCLEAV-PWY	1.5473179691591037	glycine cleavage
rna	Ara+4	PYRIDNUCSYN-PWY	1.545995115633718	NAD biosynthesis I (from aspartate)
rna	Ara-2	GLYOXYLATE-BYPASS	1.5458062145492408	glyoxylate cycle
rna	Ara+1	PWY0-166	1.544625783944163	superpathway of pyrimidine deoxyribonucleotides <i>de novo</i> biosynthesis (E. coli)
rna	Ara+5	ALL-CHORISMATE-PWY	1.5417777861108752	superpathway of chorismate metabolism
ribo	Ara+3	PWY0-381	1.5400087241597031	glycerol and glycerophosphodiester degradation
ribo	Ara-2	PWY-7184	1.539981060439694	pyrimidine deoxyribonucleotides <i>de novo</i> biosynthesis I
ribo	Ara+5	TCA	1.5336971236813146	TCA cycle I (prokaryotic)
rna	Ara-6	PWY-1269	1.5288713303780417	CMP-KDO biosynthesis I
ribo	Ara-2	PWY-6164	1.5282862175161591	3-dehydroquinate biosynthesis I
ribo	Ara-2	PWY-6125	1.528042182183884	superpathway of guanosine nucleotides <i>de novo</i> biosynthesis II
ribo	Ara-4	SO4ASSIM-PWY	1.5280120961379686	sulfate reduction I (assimilatory)
ribo	Ara+2	DETOX1-PWY	1.525683431277231	superoxide radicals degradation
ribo	Ara+1	PWY0-1348	1.5253257189851908	NADH to dimethyl sulfoxide electron transfer
ribo	Ara+1	PWY0-1356	1.5253257189851908	formate to dimethyl sulfoxide electron transfer
ribo	Ara-3	PWY-5966	1.5234444726215413	fatty acid biosynthesis initiation II
ribo	Ara-6	ALL-CHORISMATE-PWY	1.5206745037068676	superpathway of chorismate metabolism
rna	Ara+3	ACETATEUTIL-PWY	1.5205475523759329	superpathway of acetate utilization and formation
rna	Ara+1	PWY0-1021	1.520290927940129	alanine biosynthesis III
rna	Ara+3	PWY0-1336	1.520190259508296	NADH to fumarate electron transfer
rna	Ara+1	PWY-7184	1.5200902053610703	pyrimidine deoxyribonucleotides <i>de novo</i> biosynthesis I
rna	Ara-2	ASPARAGINESYN-PWY	1.5110655582741936	asparagine biosynthesis II
ribo	Ara+5	SULFATE-CYS-PWY	1.5076394178162913	superpathway of sulfate assimilation and cysteine biosynthesis
ribo	Ara-6	ACETATEUTIL-PWY	1.5055263235500638	superpathway of acetate utilization and formation
ribo	Ara-5	HOMOSERSYN-PWY	1.5040405427212844	homoserine biosynthesis
rna	Ara-6	ALL-CHORISMATE-PWY	1.5033776201422406	superpathway of chorismate metabolism
rna	Ara+3	PYRIDNUCSYN-PWY	1.502170349977043	NAD biosynthesis I (from aspartate)
rna	Ara+1	PWY0-981	1.50148463245335	taurine degradation IV
ribo	Ara-4	PWY-1801	1.4994895549595948	formaldehyde oxidation II (glutathione-dependent)
ribo	Ara-2	GLUAMCAT-PWY	1.4979412794317153	<i>N</i>-acetylglucosamine degradation I
ribo	Ara+2	ARG+POLYAMINE-SYN	1.4979137584341469	superpathway of arginine and polyamine biosynthesis
rna	Ara+4	TYRSYN	1.4958833599615768	tyrosine biosynthesis I
rna	Ara+5	TCA	1.4956482538189269	TCA cycle I (prokaryotic)
rna	Ara-1	PWY0-1348	1.4925208531721017	NADH to dimethyl sulfoxide electron transfer
rna	Ara-1	PWY0-1356	1.4925208531721017	formate to dimethyl sulfoxide electron transfer
ribo	Ara+5	PWY-6125	1.4915778105455701	superpathway of guanosine nucleotides <i>de novo</i> biosynthesis II
rna	Ara+2	PWY0-42	1.4914908079702127	2-methylcitrate cycle I
ribo	Ara+5	BIOTIN-BIOSYNTHESIS-PWY	1.4909151281954385	biotin biosynthesis I
ribo	Ara-2	PWY0-1544	1.490601849766847	proline to cytochrome <i>bo</i> oxidase electron transfer
ribo	Ara+2	PWY-6519	1.4861446568728214	8-amino-7-oxononanoate biosynthesis I
rna	Ara-3	PWY0-1507	1.4850934295415	biotin biosynthesis from 8-amino-7-oxononanoate I
ribo	Ara+5	AST-PWY	1.4848207896892038	arginine degradation II (AST pathway)
ribo	Ara-2	PWY0-1348	1.4847555036874376	NADH to dimethyl sulfoxide electron transfer
ribo	Ara-2	PWY0-1356	1.4847555036874376	formate to dimethyl sulfoxide electron transfer
rna	Ara-5	GLYOXDEG-PWY	1.4821052680959057	glycolate and glyoxylate degradation II
ribo	Ara-5	PWY-4261	1.4815664081334943	glycerol degradation I
rna	Ara+1	PWY-6126	1.4793390043584989	superpathway of adenosine nucleotides <i>de novo</i> biosynthesis II
ribo	Ara-1	PWY-4261	1.476110944986215	glycerol degradation I
ribo	Ara-3	PWY0-1021	1.4739152080682638	alanine biosynthesis III
ribo	Ara-3	PWY0-1338	1.4732238842396412	polymyxin resistance
rna	Ara+1	PWY-6535	1.470307544282729	4-aminobutyrate degradation
rna	Ara-5	GLNSYN-PWY	1.4680224566337388	glutamine biosynthesis I
rna	Ara-1	UDPNAGSYN-PWY	1.4678340105842476	UDP-<i>N</i>-acetyl-D-glucosamine biosynthesis I
rna	Ara+2	GLYCLEAV-PWY	1.4672221015147315	glycine cleavage
ribo	Ara+2	PWY0-521	1.4670117564680383	fructoselysine and psicoselysine degradation
ribo	Ara+2	BRANCHED-CHAIN-AA-SYN-PWY	1.466005690619309	superpathway of leucine, valine, and isoleucine biosynthesis
rna	Ara+2	ARG+POLYAMINE-SYN	1.4652718730310275	superpathway of arginine and polyamine biosynthesis
ribo	Ara-1	PWY-5686	1.4580462781348207	UMP biosynthesis
ribo	Ara+2	CYSTSYN-PWY	1.4554175470711406	cysteine biosynthesis I
rna	Ara+2	PWY0-1527	1.454944933530271	curcumin degradation
ribo	Ara-2	PWY-6892	1.4547224320698875	thiazole biosynthesis I (E. coli)
rna	Ara+3	BETSYN-PWY	1.4541649957621274	glycine betaine biosynthesis I (Gram-negative bacteria)
ribo	Ara+5	PWY-7184	1.454156327017746	pyrimidine deoxyribonucleotides <i>de novo</i> biosynthesis I
rna	Ara-3	PUTDEG-PWY	1.452518084536219	putrescine degradation I
ribo	Ara-1	GLYCLEAV-PWY	1.440037660075178	glycine cleavage
rna	Ara-1	PWY-6952	1.437958708022902	glycerophosphodiester degradation
rna	Ara-2	PWY0-1544	1.4367093842859722	proline to cytochrome <i>bo</i> oxidase electron transfer
ribo	Ara+1	DENOVOPURINE2-PWY	1.4359718231619765	superpathway of purine nucleotides <i>de novo</i> biosynthesis II
ribo	Ara+2	GLYCLEAV-PWY	1.435742297584896	glycine cleavage
rna	Ara-5	LCYSDEG-PWY	1.4337770183068306	L-cysteine degradation II
ribo	Ara-3	ACETOACETATE-DEG-PWY	1.433700187475255	acetoacetate degradation (to acetyl CoA)
ribo	Ara-6	BSUBPOLYAMSYN-PWY	1.431742742224226	spermidine biosynthesis I
ribo	Ara+1	PWY0-1313	1.429589534504471	acetate conversion to acetyl-CoA
rna	Ara+1	PWY-6125	1.4254719183544418	superpathway of guanosine nucleotides <i>de novo</i> biosynthesis II
ribo	Ara+3	PANTO-PWY	1.425154841394669	phosphopantothenate biosynthesis I
rna	Ara-3	GLUTAMINDEG-PWY	1.4239442986197766	glutamine degradation I
rna	Ara-1	PWY0-162	1.4226147817128783	superpathway of pyrimidine ribonucleotides <i>de novo</i> biosynthesis
rna	Ara-5	HOMOSERSYN-PWY	1.422427889842407	homoserine biosynthesis
rna	Ara-2	1CMET2-PWY	1.421588571174147	formylTHF biosynthesis
ribo	Ara-2	PWY0-1329	1.420165888922092	succinate to cytochrome <i>bo</i> oxidase electron transfer
ribo	Ara-2	PWY0-1353	1.420165888922092	succinate to cytochrome <i>bd</i> oxidase electron transfer
ribo	Ara+5	PWY-5084	1.4176825868451328	2-oxoglutarate decarboxylation to succinyl-CoA
ribo	Ara-3	SULFATE-CYS-PWY	1.4154726744422301	superpathway of sulfate assimilation and cysteine biosynthesis
ribo	Ara-5	PWY0-1329	1.4151185646697375	succinate to cytochrome <i>bo</i> oxidase electron transfer
ribo	Ara-5	PWY0-1353	1.4151185646697375	succinate to cytochrome <i>bd</i> oxidase electron transfer
ribo	Ara+5	LCYSDEG-PWY	1.4132737011323544	L-cysteine degradation II
ribo	Ara+1	CYSTSYN-PWY	1.4117396919779113	cysteine biosynthesis I
rna	Ara-3	PWY0-1021	1.4112383357889264	alanine biosynthesis III
rna	Ara-4	SO4ASSIM-PWY	1.4029610300376925	sulfate reduction I (assimilatory)
ribo	Ara-6	PWY-5659	1.400474209600659	GDP-mannose biosynthesis
rna	Ara+3	BIOTIN-BIOSYNTHESIS-PWY	1.3997576894149002	biotin biosynthesis I
ribo	Ara-4	KDO-NAGLIPASYN-PWY	1.3994693586668205	superpathway of (KDO)<SUB>2</SUB>-lipid A biosynthesis
ribo	Ara+3	PWY-6123	1.3983714729947554	inosine-5'-phosphate biosynthesis I
ribo	Ara-2	PWY-6700	1.3966726257676163	queuosine biosynthesis
rna	Ara-2	AMMASSIM-PWY	1.396574764099038	ammonia assimilation cycle III
rna	Ara-6	GLUTORN-PWY	1.3947578585459683	ornithine biosynthesis
ribo	Ara+4	PYRIDNUCSYN-PWY	1.3924676176182693	NAD biosynthesis I (from aspartate)
rna	Ara-3	PWY-5966	1.3915682890764125	fatty acid biosynthesis initiation II
ribo	Ara-1	GLNSYN-PWY	1.3884613974780111	glutamine biosynthesis I
ribo	Ara+4	GLYCOCAT-PWY	1.3876583363092985	glycogen degradation I
rna	Ara-1	PWY0-381	1.38724743476305	glycerol and glycerophosphodiester degradation
rna	Ara-3	GLUCONSUPER-PWY	1.3863654966725367	D-gluconate degradation
rna	Ara+5	PWY0-166	1.3834342804928168	superpathway of pyrimidine deoxyribonucleotides <i>de novo</i> biosynthesis (E. coli)
rna	Ara+2	BIOTIN-BIOSYNTHESIS-PWY	1.3833689883305293	biotin biosynthesis I
ribo	Ara-5	PWY0-1021	1.3813632422951792	alanine biosynthesis III
ribo	Ara+3	PWY0-1527	1.3792742956824309	curcumin degradation
rna	Ara-2	PWY-6164	1.3781205726502466	3-dehydroquinate biosynthesis I
ribo	Ara+3	PWY-6952	1.3765739928042453	glycerophosphodiester degradation
ribo	Ara-3	KETOGLUCONMET-PWY	1.3751019158693922	ketogluconate metabolism
rna	Ara-4	PWY-7220	1.3744827307883587	adenosine deoxyribonucleotides <i>de novo</i> biosynthesis II
rna	Ara-4	PWY-7222	1.3744827307883587	guanosine deoxyribonucleotides <i>de novo</i> biosynthesis II
ribo	Ara-2	THRDLCTCAT-PWY	1.37353134000291	threonine degradation III (to methylglyoxal)
rna	Ara-6	ACETATEUTIL-PWY	1.3731323368402866	superpathway of acetate utilization and formation
rna	Ara-1	PWY-6164	1.3717468067632295	3-dehydroquinate biosynthesis I
ribo	Ara+3	BETSYN-PWY	1.3702235052383722	glycine betaine biosynthesis I (Gram-negative bacteria)
rna	Ara-3	SULFATE-CYS-PWY	1.3688207594187887	superpathway of sulfate assimilation and cysteine biosynthesis
ribo	Ara-5	LCYSDEG-PWY	1.3684355386630274	L-cysteine degradation II
rna	Ara-5	ASPARAGINESYN-PWY	1.3663650762774249	asparagine biosynthesis II
ribo	Ara-2	1CMET2-PWY	1.3660122405646602	formylTHF biosynthesis
rna	Ara+1	PUTDEG-PWY	1.363669046705778	putrescine degradation I
ribo	Ara-3	FASYN-INITIAL-PWY	1.3627664576184735	superpathway of fatty acid biosynthesis initiation (E. coli)
ribo	Ara-3	PWY0-1527	1.3610936677382173	curcumin degradation
rna	Ara+3	PWY-6620	1.360879640461327	guanine and guanosine salvage
ribo	Ara-6	GLYOXYLATE-BYPASS	1.360876382281374	glyoxylate cycle
ribo	Ara-3	AMMASSIM-PWY	1.359318670309814	ammonia assimilation cycle III
rna	Ara-3	GLYOXYLATE-BYPASS	1.3583463529254822	glyoxylate cycle
rna	Ara-1	ALADEG-PWY	1.3582523689992207	alanine degradation I
rna	Ara-2	SER-GLYSYN-PWY	1.356665981852224	superpathway of serine and glycine biosynthesis I
ribo	Ara-4	THREONINE-DEG2-PWY	1.3565369965950365	threonine degradation II
ribo	Ara-3	BIOTIN-BIOSYNTHESIS-PWY	1.3556756763206255	biotin biosynthesis I
rna	Ara+4	GLYCOCAT-PWY	1.3546962533495397	glycogen degradation I
rna	Ara-3	HISTSYN-PWY	1.3527200096878353	histidine biosynthesis
ribo	Ara-2	ASPARAGINESYN-PWY	1.350234646678549	asparagine biosynthesis II
ribo	Ara+5	BETSYN-PWY	1.3472455175953506	glycine betaine biosynthesis I (Gram-negative bacteria)
ribo	Ara+1	PWY-5837	1.3461078570933682	1,4-dihydroxy-2-naphthoate biosynthesis I
ribo	Ara-4	PWY-7220	1.3432918545489505	adenosine deoxyribonucleotides <i>de novo</i> biosynthesis II
ribo	Ara-4	PWY-7222	1.3432918545489505	guanosine deoxyribonucleotides <i>de novo</i> biosynthesis II
ribo	Ara-3	LEUSYN-PWY	1.3430183666382352	leucine biosynthesis
ribo	Ara-3	PWY-5340	1.3422793379973146	sulfate activation for sulfonation
rna	Ara+5	HISTSYN-PWY	1.34066060570571	histidine biosynthesis
rna	Ara-4	CYSTSYN-PWY	1.340487934392768	cysteine biosynthesis I
rna	Ara-2	TYRSYN	1.339068951550609	tyrosine biosynthesis I
rna	Ara+3	GLUTORN-PWY	1.3385139062615934	ornithine biosynthesis
rna	Ara-2	DENOVOPURINE2-PWY	1.3380333600299386	superpathway of purine nucleotides <i>de novo</i> biosynthesis II
ribo	Ara-3	PWY0-166	1.335993257848849	superpathway of pyrimidine deoxyribonucleotides <i>de novo</i> biosynthesis (E. coli)
rna	Ara-6	GLYOXDEG-PWY	1.335346567200325	glycolate and glyoxylate degradation II
ribo	Ara+5	HISTSYN-PWY	1.3336558981388997	histidine biosynthesis
rna	Ara+4	PHESYN	1.3325930930586294	phenylalanine biosynthesis I
rna	Ara+2	GLUTAMINEFUM-PWY	1.331831945181014	glutamine degradation II
rna	Ara+2	GLUTSYN-PWY	1.331831945181014	glutamate biosynthesis I
rna	Ara+2	GLUTSYNIII-PWY	1.331831945181014	glutamate biosynthesis III
ribo	Ara+5	PYRUVOX-PWY	1.3301139600084884	pyruvate oxidation pathway
rna	Ara-1	PWY-6620	1.3301049885854557	guanine and guanosine salvage
rna	Ara-6	GLYOXYLATE-BYPASS	1.3297785276498466	glyoxylate cycle
ribo	Ara-1	PWY-5340	1.328636396561356	sulfate activation for sulfonation
rna	Ara+5	PWY-6126	1.3280213020710177	superpathway of adenosine nucleotides <i>de novo</i> biosynthesis II
ribo	Ara-3	PWY-5350	1.323474675405036	thiosulfate disproportionation III (rhodanese)
rna	Ara-1	SALVPURINE2-PWY	1.323302123882649	xanthine and xanthosine salvage
rna	Ara+5	LCYSDEG-PWY	1.3185771692169208	L-cysteine degradation II
ribo	Ara-4	PWY0-1061	1.3145788704762198	superpathway of alanine biosynthesis
rna	Ara-2	PWY0-1507	1.31309238300678	biotin biosynthesis from 8-amino-7-oxononanoate I
rna	Ara-5	PWY-5453	1.3127557458300134	methylglyoxal degradation III
ribo	Ara-2	TCA-GLYOX-BYPASS	1.3084762110577883	superpathway of glyoxylate bypass and TCA
rna	Ara-4	PWY-5852	1.3078148030397576	demethylmenaquinol-8 biosynthesis I
rna	Ara-1	PWY0-1329	1.3070952413719783	succinate to cytochrome <i>bo</i> oxidase electron transfer
rna	Ara-1	PWY0-1353	1.3070952413719783	succinate to cytochrome <i>bd</i> oxidase electron transfer
ribo	Ara-1	PWY0-381	1.306459821357404	glycerol and glycerophosphodiester degradation
ribo	Ara+4	AMMASSIM-PWY	1.3059750824339413	ammonia assimilation cycle III
ribo	Ara+5	PWY-6519	1.305896441450743	8-amino-7-oxononanoate biosynthesis I
ribo	Ara+2	PWY-5437	1.3051270069648337	threonine degradation I
rna	Ara-5	PWY-6620	1.3015035319113404	guanine and guanosine salvage
rna	Ara-5	SALVPURINE2-PWY	1.3015035319113404	xanthine and xanthosine salvage
ribo	Ara-2	LEUSYN-PWY	1.2982482951655894	leucine biosynthesis
ribo	Ara-1	PWY-6952	1.2927192301951098	glycerophosphodiester degradation
rna	Ara+2	THREOCAT-PWY	1.2923409757798145	superpathway of threonine metabolism
ribo	Ara+3	PWY0-521	1.291728499807924	fructoselysine and psicoselysine degradation
ribo	Ara-3	GLYOXYLATE-BYPASS	1.2900351706404467	glyoxylate cycle
ribo	Ara-1	PWY-6164	1.2877999371144084	3-dehydroquinate biosynthesis I
rna	Ara-2	GLYCLEAV-PWY	1.2854962748257963	glycine cleavage
rna	Ara-5	GLYOXYLATE-BYPASS	1.2854830612389687	glyoxylate cycle
rna	Ara-6	ARGSYN-PWY	1.2840111000229948	arginine biosynthesis I (via L-ornithine)
ribo	Ara-3	PWY-6126	1.282182221813187	superpathway of adenosine nucleotides <i>de novo</i> biosynthesis II
ribo	Ara-1	PWY0-1313	1.2796540414349395	acetate conversion to acetyl-CoA
rna	Ara-4	PWY-4261	1.2788610557614717	glycerol degradation I
ribo	Ara-2	DENOVOPURINE2-PWY	1.275723149642848	superpathway of purine nucleotides <i>de novo</i> biosynthesis II
ribo	Ara-1	PWY0-162	1.2736133914221361	superpathway of pyrimidine ribonucleotides <i>de novo</i> biosynthesis
ribo	Ara-5	GLNSYN-PWY	1.2716359798612265	glutamine biosynthesis I
rna	Ara+2	PWY-5437	1.2706134083693816	threonine degradation I
ribo	Ara-1	BSUBPOLYAMSYN-PWY	1.2704547004863107	spermidine biosynthesis I
rna	Ara+3	PWY0-1221	1.2682995872243599	putrescine degradation II
rna	Ara-2	PWY0-1329	1.2669367644168017	succinate to cytochrome <i>bo</i> oxidase electron transfer
rna	Ara-2	PWY0-1353	1.2669367644168017	succinate to cytochrome <i>bd</i> oxidase electron transfer
ribo	Ara-6	PWY0-1329	1.2663281350458	succinate to cytochrome <i>bo</i> oxidase electron transfer
ribo	Ara-6	PWY0-1353	1.2663281350458	succinate to cytochrome <i>bd</i> oxidase electron transfer
rna	Ara-4	GLUTAMINDEG-PWY	1.2661824580533665	glutamine degradation I
ribo	Ara-5	THRESYN-PWY	1.2653519108683091	threonine biosynthesis
ribo	Ara+3	PWY-40	1.264810870841724	putrescine biosynthesis I
ribo	Ara+3	PWY0-823	1.264810870841724	arginine degradation III (arginine decarboxylase/agmatinase pathway)
rna	Ara+2	PWY-6608	1.26290644544061	guanosine nucleotides degradation III
rna	Ara+5	BIOTIN-BIOSYNTHESIS-PWY	1.2622052421295542	biotin biosynthesis I
rna	Ara-2	TCA-GLYOX-BYPASS	1.2591033377279344	superpathway of glyoxylate bypass and TCA
rna	Ara+1	HEME-BIOSYNTHESIS-II	1.2585513239656425	heme biosynthesis from uroporphyrinogen-III I (aerobic)
ribo	Ara+4	PWY-5965	1.2581072626676604	fatty acid biosynthesis initiation III
ribo	Ara-4	LPSSYN-PWY	1.2580655461437955	superpathway of lipopolysaccharide biosynthesis
ribo	Ara+4	PWY-5453	1.2568474230075082	methylglyoxal degradation III
rna	Ara+3	SALVPURINE2-PWY	1.2549901240964014	xanthine and xanthosine salvage
rna	Ara-2	LEUSYN-PWY	1.2545258485745965	leucine biosynthesis
ribo	Ara+3	PWY-5437	1.2515196188869249	threonine degradation I
rna	Ara+3	PWY-5437	1.2505148016974899	threonine degradation I
rna	Ara-3	FASYN-INITIAL-PWY	1.2493711226088795	superpathway of fatty acid biosynthesis initiation (E. coli)
rna	Ara+5	PWY-6125	1.2444759240293881	superpathway of guanosine nucleotides <i>de novo</i> biosynthesis II
ribo	Ara-3	PWY-5971	1.2436716504715304	palmitate biosynthesis II (bacteria and plants)
rna	Ara-3	GLUTAMINEFUM-PWY	1.243425407667975	glutamine degradation II
rna	Ara-3	GLUTSYN-PWY	1.243425407667975	glutamate biosynthesis I
rna	Ara-3	GLUTSYNIII-PWY	1.243425407667975	glutamate biosynthesis III
ribo	Ara+3	PWY-6164	1.243023820549466	3-dehydroquinate biosynthesis I
ribo	Ara-1	KDO-NAGLIPASYN-PWY	1.241126943908089	superpathway of (KDO)<SUB>2</SUB>-lipid A biosynthesis
ribo	Ara-3	SAM-PWY	1.2410890294362138	S-adenosyl-L-methionine biosynthesis
rna	Ara-3	PWY0-166	1.240768185957676	superpathway of pyrimidine deoxyribonucleotides <i>de novo</i> biosynthesis (E. coli)
rna	Ara+1	HEMESYN2-PWY	1.239564928304651	heme biosynthesis from uroporphyrinogen-III II (anaerobic)
ribo	Ara-3	PWY-6519	1.2395595517769702	8-amino-7-oxononanoate biosynthesis I
ribo	Ara+1	HEMESYN2-PWY	1.2386231327983592	heme biosynthesis from uroporphyrinogen-III II (anaerobic)
rna	Ara-3	GLUCOSE1PMETAB-PWY	1.2385820206077924	glucose and glucose-1-phosphate degradation
ribo	Ara+1	HEME-BIOSYNTHESIS-II	1.2351947386537916	heme biosynthesis from uroporphyrinogen-III I (aerobic)
rna	Ara-1	SO4ASSIM-PWY	1.2350624856369483	sulfate reduction I (assimilatory)
ribo	Ara-2	THRESYN-PWY	1.2349448223663146	threonine biosynthesis
ribo	Ara-5	PWY0-1507	1.234825825488926	biotin biosynthesis from 8-amino-7-oxononanoate I
rna	Ara-5	THRESYN-PWY	1.2346985498247542	threonine biosynthesis
rna	Ara-5	PWY0-1348	1.233405681274377	NADH to dimethyl sulfoxide electron transfer
rna	Ara-5	PWY0-1356	1.233405681274377	formate to dimethyl sulfoxide electron transfer
ribo	Ara-4	PWY-5852	1.2323661924463094	demethylmenaquinol-8 biosynthesis I
ribo	Ara+4	PWY0-1329	1.2321409339166105	succinate to cytochrome <i>bo</i> oxidase electron transfer
ribo	Ara+4	PWY0-1353	1.2321409339166105	succinate to cytochrome <i>bd</i> oxidase electron transfer
ribo	Ara-3	HISTSYN-PWY	1.2320064252067517	histidine biosynthesis
ribo	Ara-3	PWY0-881	1.2303833902592718	superpathway of fatty acid biosynthesis I (E. coli)
ribo	Ara+3	PWY0-1221	1.230217759432028	putrescine degradation II
rna	Ara-4	ILEUSYN-PWY	1.230176907854941	isoleucine biosynthesis I (from threonine)
ribo	Ara-4	PWY-4261	1.229111777102963	glycerol degradation I
ribo	Ara-3	PWY-7344	1.2287335062484657	UDP-D-galactose biosynthesis
ribo	Ara+3	PWY-6537	1.2286250848590914	4-aminobutyrate degradation II
rna	Ara-5	HOMOSER-THRESYN-PWY	1.228243699512506	threonine biosynthesis from homoserine
ribo	Ara-4	SULFATE-CYS-PWY	1.2281786836544364	superpathway of sulfate assimilation and cysteine biosynthesis
ribo	Ara-2	PWY-7247	1.2281404109076945	&beta;-D-glucuronide and D-glucuronate degradation
ribo	Ara-5	PWY0-381	1.2263180842103218	glycerol and glycerophosphodiester degradation
ribo	Ara+1	GLUCONSUPER-PWY	1.226291714762732	D-gluconate degradation
ribo	Ara-4	PWY-6772	1.224346520161556	hydrogen production V
rna	Ara+5	PWY-7184	1.2213856318257523	pyrimidine deoxyribonucleotides <i>de novo</i> biosynthesis I
ribo	Ara+3	GLUCONSUPER-PWY	1.220310946462034	D-gluconate degradation
rna	Ara+4	BSUBPOLYAMSYN-PWY	1.2202846783074772	spermidine biosynthesis I
rna	Ara+3	PWY-5485	1.2196165150453369	pyruvate fermentation to acetate IV
rna	Ara+3	PWY0-1312	1.2196165150453369	acetate formation from acetyl-CoA I
rna	Ara+1	4AMINOBUTMETAB-PWY	1.2195127086725919	superpathway of 4-aminobutyrate degradation
ribo	Ara+3	GLUTAMINDEG-PWY	1.2185908464352293	glutamine degradation I
ribo	Ara+3	PWY0-1336	1.2185642232713183	NADH to fumarate electron transfer
ribo	Ara-3	PWY-6125	1.2166338946708528	superpathway of guanosine nucleotides <i>de novo</i> biosynthesis II
ribo	Ara-2	PWY0-1275	1.2158457441955624	lipoate biosynthesis and incorporation II
ribo	Ara+3	GLUTORN-PWY	1.2146737135004613	ornithine biosynthesis
ribo	Ara+2	THREOCAT-PWY	1.211057224360426	superpathway of threonine metabolism
ribo	Ara-3	FASYN-ELONG-PWY	1.210914359579587	fatty acid elongation -- saturated
rna	Ara+3	GLYOXDEG-PWY	1.2108246221637802	glycolate and glyoxylate degradation II
rna	Ara+1	PWY0-1221	1.2106305101375006	putrescine degradation II
rna	Ara-3	LEUSYN-PWY	1.210045836582342	leucine biosynthesis
rna	Ara-4	PWY0-1061	1.208727816207058	superpathway of alanine biosynthesis
ribo	Ara-1	PWY-6620	1.206842287255646	guanine and guanosine salvage
ribo	Ara+5	PWY0-1337	1.2057686785831547	oleate &beta;-oxidation
ribo	Ara-2	PWY-40	1.2044646446483087	putrescine biosynthesis I
ribo	Ara-2	PWY0-823	1.2044646446483087	arginine degradation III (arginine decarboxylase/agmatinase pathway)
ribo	Ara-2	PHESYN	1.203773195857703	phenylalanine biosynthesis I
ribo	Ara-5	PWY-5453	1.2037409242910528	methylglyoxal degradation III
rna	Ara-3	PWY-6126	1.2029410978045327	superpathway of adenosine nucleotides <i>de novo</i> biosynthesis II
rna	Ara+4	TRPSYN-PWY	1.200697008918066	tryptophan biosynthesis
rna	Ara+1	ORNDEG-PWY	1.2000560797085587	superpathway of ornithine degradation
ribo	Ara-3	PWY-7184	1.199175310028925	pyrimidine deoxyribonucleotides <i>de novo</i> biosynthesis I
ribo	Ara-3	PWY0-1329	1.1972690800808308	succinate to cytochrome <i>bo</i> oxidase electron transfer
ribo	Ara-3	PWY0-1353	1.1972690800808308	succinate to cytochrome <i>bd</i> oxidase electron transfer
rna	Ara-4	SULFATE-CYS-PWY	1.1961149887231122	superpathway of sulfate assimilation and cysteine biosynthesis
ribo	Ara+3	PYRIDNUCSYN-PWY	1.1924139607608448	NAD biosynthesis I (from aspartate)
ribo	Ara+4	BIOTIN-BIOSYNTHESIS-PWY	1.1922209057551452	biotin biosynthesis I
ribo	Ara-6	GLYOXDEG-PWY	1.1916355361531277	glycolate and glyoxylate degradation II
rna	Ara-2	THRESYN-PWY	1.1913327777601537	threonine biosynthesis
rna	Ara-6	BETSYN-PWY	1.1899639393976573	glycine betaine biosynthesis I (Gram-negative bacteria)
ribo	Ara+1	PWY-6535	1.1896689315275797	4-aminobutyrate degradation
ribo	Ara+3	GLYOXDEG-PWY	1.1892909219365657	glycolate and glyoxylate degradation II
rna	Ara+3	HOMOSER-THRESYN-PWY	1.1890210542425714	threonine biosynthesis from homoserine
ribo	Ara+4	TRPSYN-PWY	1.1880689575494319	tryptophan biosynthesis
ribo	Ara-1	SALVPURINE2-PWY	1.184025639782636	xanthine and xanthosine salvage
ribo	Ara+3	ALADEG-PWY	1.1839518471742498	alanine degradation I
ribo	Ara-2	PWY0-501	1.1816452769892343	lipoate biosynthesis and incorporation I
ribo	Ara+5	DENOVOPURINE2-PWY	1.1808549445632837	superpathway of purine nucleotides <i>de novo</i> biosynthesis II
rna	Ara-5	PYRIDNUCSYN-PWY	1.1785969401958272	NAD biosynthesis I (from aspartate)
ribo	Ara+5	PWY-5453	1.1784707346061314	methylglyoxal degradation III
ribo	Ara+5	METHGLYUT-PWY	1.1778893735086546	superpathway of methylglyoxal degradation
rna	Ara-1	PWY-7184	1.1752035254213076	pyrimidine deoxyribonucleotides <i>de novo</i> biosynthesis I
rna	Ara+5	PYRUVOX-PWY	1.1749809035502865	pyruvate oxidation pathway
ribo	Ara-5	GLYOXDEG-PWY	1.1739947042235754	glycolate and glyoxylate degradation II
rna	Ara-4	VALSYN-PWY	1.1734487880229554	valine biosynthesis
ribo	Ara-5	HOMOSER-THRESYN-PWY	1.1721496774200588	threonine biosynthesis from homoserine
ribo	Ara-3	PWY-5964	1.1700612426088008	guanylyl molybdenum cofactor biosynthesis
ribo	Ara+2	PWY-5659	1.1692556082199377	GDP-mannose biosynthesis
ribo	Ara+4	IDNCAT-PWY	1.167950227417327	L-idonate degradation
rna	Ara-1	PWY-6579	1.167206887727123	superpathway of guanine and guanosine salvage
ribo	Ara-2	PWY0-461	1.167048811947094	lysine degradation I
rna	Ara+3	PWY-6579	1.1665904045981164	superpathway of guanine and guanosine salvage
rna	Ara+3	PANTOSYN-PWY	1.1651280926684913	pantothenate and coenzyme A biosynthesis I
rna	Ara+1	GLYCOL-GLYOXDEG-PWY	1.1642073316406727	superpathway of glycol metabolism and degradation
rna	Ara-4	PWY-5437	1.1625863232247362	threonine degradation I
ribo	Ara+5	GLUTORN-PWY	1.1624997528081014	ornithine biosynthesis
rna	Ara+4	GLUTAMINDEG-PWY	1.1604436850833644	glutamine degradation I
rna	Ara-1	PWY0-781	1.1604308977122748	aspartate superpathway
ribo	Ara-2	PWY0-1338	1.1599922343911615	polymyxin resistance
ribo	Ara-3	PWY-5973	1.1595441503504023	<i>cis</i>-vaccenate biosynthesis
ribo	Ara-5	GLYOXYLATE-BYPASS	1.1567354665200031	glyoxylate cycle
ribo	Ara+3	PWY-6620	1.1561774430582565	guanine and guanosine salvage
ribo	Ara-4	ILEUSYN-PWY	1.1554658650692617	isoleucine biosynthesis I (from threonine)
ribo	Ara+1	PWY-5838	1.1550232819570823	superpathway of menaquinol-8 biosynthesis I
rna	Ara-1	PWY-5340	1.1546114257630382	sulfate activation for sulfonation
rna	Ara-1	BSUBPOLYAMSYN-PWY	1.153721373576128	spermidine biosynthesis I
rna	Ara-1	PWY0-163	1.1536343019967832	salvage pathways of pyrimidine ribonucleotides
rna	Ara+1	PWY0-1348	1.1527823718499477	NADH to dimethyl sulfoxide electron transfer
rna	Ara+1	PWY0-1356	1.1527823718499477	formate to dimethyl sulfoxide electron transfer
ribo	Ara-3	PWY-6282	1.1526140881530635	palmitoleate biosynthesis I
ribo	Ara+3	PWY-5485	1.1524812650394174	pyruvate fermentation to acetate IV
ribo	Ara+3	PWY0-1312	1.1524812650394174	acetate formation from acetyl-CoA I
rna	Ara-5	TCA-GLYOX-BYPASS	1.1521004258838463	superpathway of glyoxylate bypass and TCA
ribo	Ara-6	PWY0-42	1.1511788370820883	2-methylcitrate cycle I
rna	Ara+2	SALVADEHYPOX-PWY	1.1467159188868845	adenosine nucleotides degradation II
ribo	Ara+2	LYXMET-PWY	1.1464046131134613	L-lyxose degradation
ribo	Ara-3	PWY-6284	1.1463779673415662	superpathway of unsaturated fatty acids biosynthesis (<i>E. coli</i>)
ribo	Ara-2	PWY-6628	1.146225617859639	superpathway of phenylalanine biosynthesis
ribo	Ara+4	PWY0-1303	1.1458923197440185	aminopropylcadaverine biosynthesis
ribo	Ara+2	PWY-6028	1.1457529576399812	acetoin degradation
ribo	Ara-6	KDO-NAGLIPASYN-PWY	1.1455054382558254	superpathway of (KDO)<SUB>2</SUB>-lipid A biosynthesis
rna	Ara-2	PWY-2161	1.144604282674077	folate polyglutamylation
ribo	Ara-4	ALADEG-PWY	1.1443453096895473	alanine degradation I
rna	Ara+5	PWY-5965	1.1431173361786748	fatty acid biosynthesis initiation III
rna	Ara+3	PWY0-1329	1.1427977925441477	succinate to cytochrome <i>bo</i> oxidase electron transfer
rna	Ara+3	PWY0-1353	1.1427977925441477	succinate to cytochrome <i>bd</i> oxidase electron transfer
ribo	Ara+1	PWY0-981	1.1414328433770449	taurine degradation IV
ribo	Ara-2	PWY-5686	1.140009401732065	UMP biosynthesis
ribo	Ara+5	PWY0-1021	1.1393161969809669	alanine biosynthesis III
ribo	Ara+3	ARGDEG-PWY	1.1388847003291407	superpathway of arginine, putrescine, and 4-aminobutyrate degradation
rna	Ara+1	DENOVOPURINE2-PWY	1.1379709839857695	superpathway of purine nucleotides <i>de novo</i> biosynthesis II
ribo	Ara-6	GLUTORN-PWY	1.1373274436814764	ornithine biosynthesis
rna	Ara-2	PYRIDNUCSYN-PWY	1.136522174880618	NAD biosynthesis I (from aspartate)
ribo	Ara+5	GLYCEROLMETAB-PWY	1.1357224621682156	glycerol degradation V
ribo	Ara-2	GALACT-GLUCUROCAT-PWY	1.1349749042065034	superpathway of hexuronide and hexuronate degradation
ribo	Ara-4	CYSTSYN-PWY	1.1331915490189723	cysteine biosynthesis I
rna	Ara-5	AMMASSIM-PWY	1.1328063485685727	ammonia assimilation cycle III
rna	Ara-2	DETOX1-PWY	1.1308293776540221	superoxide radicals degradation
ribo	Ara-2	ARO-PWY	1.1292449240347964	chorismate biosynthesis I
ribo	Ara-5	ALADEG-PWY	1.1285976882312647	alanine degradation I
rna	Ara+4	KDO-NAGLIPASYN-PWY	1.1284993702908699	superpathway of (KDO)<SUB>2</SUB>-lipid A biosynthesis
rna	Ara+3	PWY-6164	1.1271755025159502	3-dehydroquinate biosynthesis I
ribo	Ara-2	SER-GLYSYN-PWY	1.1266040615417199	superpathway of serine and glycine biosynthesis I
ribo	Ara-3	PWY0-862	1.1257784396573607	<i>cis</i>-dodecenoyl biosynthesis
ribo	Ara-2	GLYCLEAV-PWY	1.1236124528295082	glycine cleavage
rna	Ara+4	PWY0-1507	1.1234624591338052	biotin biosynthesis from 8-amino-7-oxononanoate I
rna	Ara-3	PWY-7184	1.1228254027106994	pyrimidine deoxyribonucleotides <i>de novo</i> biosynthesis I
rna	Ara+5	BETSYN-PWY	1.1226982169826738	glycine betaine biosynthesis I (Gram-negative bacteria)
ribo	Ara+3	PWY0-42	1.1219539092901183	2-methylcitrate cycle I
rna	Ara+1	PWY0-1466	1.1212890172011871	trehalose degradation VI (periplasmic)
rna	Ara-1	1CMET2-PWY	1.1193592406059156	formylTHF biosynthesis
ribo	Ara-3	PWY-5453	1.118464536972805	methylglyoxal degradation III
rna	Ara+3	PWY-6537	1.117881093841735	4-aminobutyrate degradation II
ribo	Ara-2	GLUCUROCAT-PWY	1.1173921626880066	superpathway of &beta;-D-glucuronide and D-glucuronate degradation
rna	Ara-2	THRDLCTCAT-PWY	1.1153314648311938	threonine degradation III (to methylglyoxal)
rna	Ara-3	PWY-6125	1.1149534957513803	superpathway of guanosine nucleotides <i>de novo</i> biosynthesis II
ribo	Ara-1	ALADEG-PWY	1.1132349483508153	alanine degradation I
rna	Ara-2	BRANCHED-CHAIN-AA-SYN-PWY	1.1130667472361722	superpathway of leucine, valine, and isoleucine biosynthesis
ribo	Ara+2	PWY-5453	1.1118934349326572	methylglyoxal degradation III
rna	Ara-3	BIOTIN-BIOSYNTHESIS-PWY	1.111017774708612	biotin biosynthesis I
ribo	Ara+3	HOMOSER-THRESYN-PWY	1.1105049653829921	threonine biosynthesis from homoserine
rna	Ara-2	ARO-PWY	1.1073900349806054	chorismate biosynthesis I
ribo	Ara+1	PWY0-1221	1.1054715639096002	putrescine degradation II
rna	Ara+4	PWY-5965	1.1047549110089991	fatty acid biosynthesis initiation III
ribo	Ara-1	ARGSYN-PWY	1.1046294220085042	arginine biosynthesis I (via L-ornithine)
ribo	Ara-1	LPSSYN-PWY	1.101924782349032	superpathway of lipopolysaccharide biosynthesis
rna	Ara+5	VALSYN-PWY	1.10173637778141	valine biosynthesis
ribo	Ara+3	PWY-6122	1.1014829914588402	5-aminoimidazole ribonucleotide biosynthesis II
ribo	Ara-1	SULFATE-CYS-PWY	1.1006942760299363	superpathway of sulfate assimilation and cysteine biosynthesis
rna	Ara-1	METHGLYUT-PWY	1.1004267112896335	superpathway of methylglyoxal degradation
rna	Ara-2	PWY0-1325	1.0977245955264907	superpathway of asparagine biosynthesis
ribo	Ara+3	PWY0-1329	1.0976242943764476	succinate to cytochrome <i>bo</i> oxidase electron transfer
ribo	Ara+3	PWY0-1353	1.0976242943764476	succinate to cytochrome <i>bd</i> oxidase electron transfer
rna	Ara-5	PWY-7220	1.0974842134689504	adenosine deoxyribonucleotides <i>de novo</i> biosynthesis II
rna	Ara-5	PWY-7222	1.0974842134689504	guanosine deoxyribonucleotides <i>de novo</i> biosynthesis II
ribo	Ara+3	4AMINOBUTMETAB-PWY	1.096257047277776	superpathway of 4-aminobutyrate degradation
ribo	Ara-1	GLUAMCAT-PWY	1.0949442305405432	<i>N</i>-acetylglucosamine degradation I
ribo	Ara+3	PWY-6277	1.0942273917056509	superpathway of 5-aminoimidazole ribonucleotide biosynthesis
rna	Ara+3	ORNDEG-PWY	1.093328816027726	superpathway of ornithine degradation
ribo	Ara+2	ETOH-ACETYLCOA-ANA-PWY	1.0917788863518554	ethanol degradation I
ribo	Ara+2	PWY-5480	1.0917788863518554	pyruvate fermentation to ethanol I
rna	Ara-4	THREONINE-DEG2-PWY	1.091479666844442	threonine degradation II
ribo	Ara+3	ORNARGDEG-PWY	1.0914139273743768	superpathway of arginine and ornithine degradation
rna	Ara-1	ARGSYN-PWY	1.091387852675124	arginine biosynthesis I (via L-ornithine)
rna	Ara+3	PWY-6535	1.0912425976327602	4-aminobutyrate degradation
ribo	Ara+5	ARGSYN-PWY	1.0910610458736085	arginine biosynthesis I (via L-ornithine)
ribo	Ara-2	BRANCHED-CHAIN-AA-SYN-PWY	1.08977750812749	superpathway of leucine, valine, and isoleucine biosynthesis
rna	Ara+5	PWY-6519	1.0897343604410075	8-amino-7-oxononanoate biosynthesis I
rna	Ara+5	PWY0-1021	1.0895696555809096	alanine biosynthesis III
ribo	Ara-6	TCA-GLYOX-BYPASS	1.0876297604505119	superpathway of glyoxylate bypass and TCA
ribo	Ara+5	PWY-46	1.087596022220996	putrescine biosynthesis III
rna	Ara+3	PWY-6123	1.0874923670672043	inosine-5'-phosphate biosynthesis I
rna	Ara+2	PWY-6519	1.0865529960732654	8-amino-7-oxononanoate biosynthesis I
rna	Ara-2	PRPP-PWY	1.0863693799698915	superpathway of histidine, purine, and pyrimidine biosynthesis
ribo	Ara-2	GALACTUROCAT-PWY	1.086330748762459	D-galacturonate degradation I
rna	Ara-3	PWY-7247	1.086189917644524	&beta;-D-glucuronide and D-glucuronate degradation
ribo	Ara+1	PWY-5148	1.0854383757858974	acyl-CoA hydrolysis
ribo	Ara-4	PWY0-381	1.085244543776754	glycerol and glycerophosphodiester degradation
rna	Ara-1	HOMOSER-METSYN-PWY	1.0848759885840495	methionine biosynthesis I
ribo	Ara+1	GLYCOL-GLYOXDEG-PWY	1.0846602604248639	superpathway of glycol metabolism and degradation
ribo	Ara-5	PWY-6952	1.084599083490921	glycerophosphodiester degradation
ribo	Ara+1	PWY0-1479	1.084303184199548	tRNA processing
ribo	Ara-4	VALSYN-PWY	1.0842199787629512	valine biosynthesis
rna	Ara-5	PWY-6579	1.0831208509455146	superpathway of guanine and guanosine salvage
rna	Ara+3	ARGDEG-PWY	1.0814578522479144	superpathway of arginine, putrescine, and 4-aminobutyrate degradation
ribo	Ara+3	PWY0-1544	1.0807963894749906	proline to cytochrome <i>bo</i> oxidase electron transfer
rna	Ara-2	VALSYN-PWY	1.0801872667313073	valine biosynthesis
ribo	Ara+1	PWY0-1466	1.0797538301225795	trehalose degradation VI (periplasmic)
rna	Ara+3	ALANINE-VALINESYN-PWY	1.0793423459195803	alanine biosynthesis I
rna	Ara-6	ARG+POLYAMINE-SYN	1.0791633040797028	superpathway of arginine and polyamine biosynthesis
ribo	Ara-4	PWY-6125	1.0788554150835359	superpathway of guanosine nucleotides <i>de novo</i> biosynthesis II
rna	Ara+3	ARGSYN-PWY	1.0776770208978987	arginine biosynthesis I (via L-ornithine)
ribo	Ara-4	PWY-6952	1.0771527941815937	glycerophosphodiester degradation
ribo	Ara-4	KDOSYN-PWY	1.0771224950642695	KDO transfer to lipid IV<sub>A</sub> I
rna	Ara-5	PYRUVDEHYD-PWY	1.076291704842615	pyruvate decarboxylation to acetyl CoA
rna	Ara+4	THREONINE-DEG2-PWY	1.0751551034972686	threonine degradation II
rna	Ara-2	PWY-7247	1.0748136735895206	&beta;-D-glucuronide and D-glucuronate degradation
rna	Ara-2	PWY-6628	1.0741090332208165	superpathway of phenylalanine biosynthesis
rna	Ara-2	PWY-40	1.072387032523466	putrescine biosynthesis I
rna	Ara-2	PWY0-823	1.072387032523466	arginine degradation III (arginine decarboxylase/agmatinase pathway)
ribo	Ara-2	PRPP-PWY	1.070054185133009	superpathway of histidine, purine, and pyrimidine biosynthesis
rna	Ara-1	HOMOSER-THRESYN-PWY	1.0700016660386098	threonine biosynthesis from homoserine
rna	Ara-5	PWY0-1507	1.0698747993018816	biotin biosynthesis from 8-amino-7-oxononanoate I
rna	Ara-4	PWY-6125	1.0689076759092022	superpathway of guanosine nucleotides <i>de novo</i> biosynthesis II
rna	Ara+5	PYRUVDEHYD-PWY	1.0685752939612905	pyruvate decarboxylation to acetyl CoA
ribo	Ara+1	PWY-5659	1.067921270427628	GDP-mannose biosynthesis
rna	Ara+4	ARGSYN-PWY	1.067207258499928	arginine biosynthesis I (via L-ornithine)
ribo	Ara-2	COMPLETE-ARO-PWY	1.0668113550754637	superpathway of phenylalanine, tyrosine, and tryptophan biosynthesis
ribo	Ara+5	PRPP-PWY	1.0655492411271354	superpathway of histidine, purine, and pyrimidine biosynthesis
rna	Ara+5	TRYPDEG-PWY	1.0651278357532978	tryptophan degradation II (via pyruvate)
ribo	Ara-2	DAPLYSINESYN-PWY	1.0647855535226587	lysine biosynthesis I
rna	Ara-4	PWY0-381	1.0618919703217238	glycerol and glycerophosphodiester degradation
rna	Ara-4	PWY-6126	1.0610868611170612	superpathway of adenosine nucleotides <i>de novo</i> biosynthesis II
rna	Ara-2	DAPLYSINESYN-PWY	1.0604409019661747	lysine biosynthesis I
rna	Ara-2	SERSYN-PWY	1.0591888624841308	serine biosynthesis
ribo	Ara-2	SO4ASSIM-PWY	1.0591127557846083	sulfate reduction I (assimilatory)
ribo	Ara-3	PWY-6151	1.0583269715919832	<i>S</i>-adenosyl-L-methionine cycle I
ribo	Ara-2	PWY-7242	1.05767832227129	D-fructuronate degradation
rna	Ara+3	ALANINE-SYN2-PWY	1.057641169351274	alanine biosynthesis II
ribo	Ara+5	PWY-5698	1.057186386920529	allantoin degradation to ureidoglycolate II (ammonia producing)
ribo	Ara+3	TRESYN-PWY	1.0554940775707322	trehalose biosynthesis I
ribo	Ara+4	TCA	1.0553558537823056	TCA cycle I (prokaryotic)
rna	Ara-3	PWY0-881	1.0550446803042166	superpathway of fatty acid biosynthesis I (E. coli)
ribo	Ara-2	PWY-2161	1.0550013828558404	folate polyglutamylation
ribo	Ara+5	ALANINE-SYN2-PWY	1.0548767079350931	alanine biosynthesis II
ribo	Ara+3	KDOSYN-PWY	1.05470248316263	KDO transfer to lipid IV<sub>A</sub> I
rna	Ara-4	PWY0-1021	1.052427377958313	alanine biosynthesis III
rna	Ara-1	TYRSYN	1.052237922536985	tyrosine biosynthesis I
ribo	Ara+3	PWY0-1479	1.0516809880576041	tRNA processing
ribo	Ara+3	PWY-5852	1.0516238580933153	demethylmenaquinol-8 biosynthesis I
ribo	Ara+3	ALANINE-VALINESYN-PWY	1.0509940985820756	alanine biosynthesis I
rna	Ara-1	PWY-7176	1.0507012128815958	UTP and CTP <i>de novo</i> biosynthesis
ribo	Ara-6	ARGSYN-PWY	1.0498584738028793	arginine biosynthesis I (via L-ornithine)
rna	Ara+3	PWY0-1299	1.0496884396205666	arginine dependent acid resistance
ribo	Ara-2	PWY0-1303	1.0495477898070258	aminopropylcadaverine biosynthesis
rna	Ara-4	ASPARAGINESYN-PWY	1.0494699992228735	asparagine biosynthesis II
rna	Ara-1	HISTSYN-PWY	1.0494252553855967	histidine biosynthesis
rna	Ara-6	TCA-GLYOX-BYPASS	1.0465663673075376	superpathway of glyoxylate bypass and TCA
ribo	Ara+2	ALANINE-SYN2-PWY	1.0462237011696194	alanine biosynthesis II
rna	Ara-1	KDO-NAGLIPASYN-PWY	1.044622573584044	superpathway of (KDO)<SUB>2</SUB>-lipid A biosynthesis
ribo	Ara+5	PWY0-1336	1.0440683423821793	NADH to fumarate electron transfer
ribo	Ara+3	PWY0-1466	1.043698068703642	trehalose degradation VI (periplasmic)
rna	Ara-2	GLYCOL-GLYOXDEG-PWY	1.0428486257965768	superpathway of glycol metabolism and degradation
rna	Ara+3	ORNARGDEG-PWY	1.0422824267474222	superpathway of arginine and ornithine degradation
ribo	Ara+2	PWY-6123	1.041736970085423	inosine-5'-phosphate biosynthesis I
rna	Ara+5	ILEUSYN-PWY	1.041537731944336	isoleucine biosynthesis I (from threonine)
rna	Ara+3	GLUTAMINDEG-PWY	1.0413537262451986	glutamine degradation I
rna	Ara+3	GLUTAMINEFUM-PWY	1.0413537262451986	glutamine degradation II
rna	Ara+3	GLUTSYN-PWY	1.0413537262451986	glutamate biosynthesis I
rna	Ara+3	GLUTSYNIII-PWY	1.0413537262451986	glutamate biosynthesis III
rna	Ara-6	COLANSYN-PWY	1.0411592984599467	colanic acid building blocks biosynthesis
rna	Ara+3	THIOREDOX-PWY	1.041147129513798	thioredoxin pathway
rna	Ara-3	PWY-7446	1.0409940256185692	sulfoglycolysis
ribo	Ara+2	PWY0-1317	1.0407400372221314	L-lactaldehyde degradation (aerobic)
ribo	Ara-3	PWY-5084	1.0401436270674065	2-oxoglutarate decarboxylation to succinyl-CoA
rna	Ara+3	4AMINOBUTMETAB-PWY	1.0398823803248192	superpathway of 4-aminobutyrate degradation
ribo	Ara-2	PWY-6823	1.0397090032439085	molybdenum cofactor biosynthesis
ribo	Ara-2	POLYAMSYN-PWY	1.0382546358229336	superpathway of polyamine biosynthesis I
ribo	Ara+1	ILEUSYN-PWY	1.0377902612550838	isoleucine biosynthesis I (from threonine)
rna	Ara-1	PWY-5148	1.0372705671968905	acyl-CoA hydrolysis
ribo	Ara-1	TYRSYN	1.0371733224912345	tyrosine biosynthesis I
ribo	Ara-2	PWY0-1336	1.0370085070952906	NADH to fumarate electron transfer
ribo	Ara-1	1CMET2-PWY	1.0364755056534374	formylTHF biosynthesis
ribo	Ara-3	PWY0-1347	1.0344251904626425	NADH to trimethylamine <i>N</i>-oxide electron transfer
ribo	Ara-3	PWY0-1355	1.0344251904626425	formate to trimethylamine <i>N</i>-oxide electron transfer
ribo	Ara+3	ORNDEG-PWY	1.0343652788949347	superpathway of ornithine degradation
ribo	Ara-3	PWY-6556	1.0341983435592845	pyrimidine ribonucleosides salvage II
ribo	Ara+4	KETOGLUCONMET-PWY	1.0334041772219014	ketogluconate metabolism
ribo	Ara+2	PWY-6961	1.033398344538513	L-ascorbate degradation II (bacterial, aerobic)
rna	Ara+2	ALANINE-SYN2-PWY	1.0329782589345726	alanine biosynthesis II
ribo	Ara-5	PWY-6620	1.0327700294651025	guanine and guanosine salvage
rna	Ara-4	GLNSYN-PWY	1.0321504814019251	glutamine biosynthesis I
rna	Ara+2	ALANINE-VALINESYN-PWY	1.0319925822321745	alanine biosynthesis I
ribo	Ara+3	DENOVOPURINE2-PWY	1.0319244464381288	superpathway of purine nucleotides <i>de novo</i> biosynthesis II
ribo	Ara-5	SERDEG-PWY	1.031764935867539	L-serine degradation
ribo	Ara-5	TCA-GLYOX-BYPASS	1.0317271231513354	superpathway of glyoxylate bypass and TCA
rna	Ara+3	PWY-4261	1.0316409923249026	glycerol degradation I
ribo	Ara-1	PWY-6579	1.0314267067976444	superpathway of guanine and guanosine salvage
rna	Ara+1	PWY0-1415	1.0308475545875084	superpathway of heme biosynthesis from uroporphyrinogen-III
ribo	Ara-4	PWY-6126	1.030733437371287	superpathway of adenosine nucleotides <i>de novo</i> biosynthesis II
rna	Ara+4	GLUTORN-PWY	1.0305552005225758	ornithine biosynthesis
rna	Ara+3	PWY0-1479	1.0304987327737156	tRNA processing
rna	Ara-3	PWY-5971	1.0303352153675498	palmitate biosynthesis II (bacteria and plants)
ribo	Ara-6	PWY0-1303	1.0297575948148845	aminopropylcadaverine biosynthesis
rna	Ara-5	ARABCAT-PWY	1.0285913548777799	L-arabinose degradation I
ribo	Ara+1	PWY-6164	1.0283508619710662	3-dehydroquinate biosynthesis I
rna	Ara-3	PWY-7180	1.0282932156524889	2'-deoxy-&alpha;-D-ribose 1-phosphate degradation
ribo	Ara+5	NONOXIPENT-PWY	1.0278281911457439	pentose phosphate pathway (non-oxidative branch)
rna	Ara-1	PRPP-PWY	1.0272402103569533	superpathway of histidine, purine, and pyrimidine biosynthesis
ribo	Ara-1	HOMOSER-METSYN-PWY	1.0252125069624058	methionine biosynthesis I
ribo	Ara+3	PWY-5084	1.025133210677841	2-oxoglutarate decarboxylation to succinyl-CoA
ribo	Ara+1	4AMINOBUTMETAB-PWY	1.0249843606154034	superpathway of 4-aminobutyrate degradation
rna	Ara+2	DETOX1-PWY	1.024824919992305	superoxide radicals degradation
ribo	Ara+4	PUTDEG-PWY	1.024052053085319	putrescine degradation I
rna	Ara-6	PWY0-42	1.023794834908307	2-methylcitrate cycle I
rna	Ara-3	PWY-5340	1.0236415906300749	sulfate activation for sulfonation
ribo	Ara+2	GLUTAMINEFUM-PWY	1.0232915959694884	glutamine degradation II
ribo	Ara+2	GLUTSYN-PWY	1.0232915959694884	glutamate biosynthesis I
ribo	Ara+2	GLUTSYNIII-PWY	1.0232915959694884	glutamate biosynthesis III
rna	Ara-3	PWY0-1305	1.0232369133689687	glutamate dependent acid resistance
ribo	Ara-1	METHGLYUT-PWY	1.0227915384991422	superpathway of methylglyoxal degradation
rna	Ara+2	PYRUVOX-PWY	1.0226599614260363	pyruvate oxidation pathway
ribo	Ara-5	PWY-5084	1.022521587527902	2-oxoglutarate decarboxylation to succinyl-CoA
ribo	Ara+5	PYRUVDEHYD-PWY	1.0222258733384717	pyruvate decarboxylation to acetyl CoA
ribo	Ara-5	SALVPURINE2-PWY	1.020170757054706	xanthine and xanthosine salvage
rna	Ara-5	CYSTSYN-PWY	1.0201649871804839	cysteine biosynthesis I
ribo	Ara+2	PWY-4261	1.0195571805480854	glycerol degradation I
ribo	Ara-2	GLYCOL-GLYOXDEG-PWY	1.0194235831681095	superpathway of glycol metabolism and degradation
ribo	Ara-6	LPSSYN-PWY	1.0192862761994088	superpathway of lipopolysaccharide biosynthesis
ribo	Ara+5	ILEUSYN-PWY	1.0179423808076036	isoleucine biosynthesis I (from threonine)
rna	Ara-2	PWY-6700	1.0177402709032244	queuosine biosynthesis
ribo	Ara-1	SERDEG-PWY	1.0175584591883946	L-serine degradation
ribo	Ara-4	THRDLCTCAT-PWY	1.017303079283279	threonine degradation III (to methylglyoxal)
rna	Ara+5	PYRIDNUCSYN-PWY	1.0165343058327354	NAD biosynthesis I (from aspartate)
ribo	Ara-1	UDPNAGSYN-PWY	1.0165107234502135	UDP-<i>N</i>-acetyl-D-glucosamine biosynthesis I
rna	Ara-2	COMPLETE-ARO-PWY	1.0159273073478683	superpathway of phenylalanine, tyrosine, and tryptophan biosynthesis
ribo	Ara+1	PWY0-1415	1.0153625014760324	superpathway of heme biosynthesis from uroporphyrinogen-III
ribo	Ara+3	ARGSYN-PWY	1.0150505020321166	arginine biosynthesis I (via L-ornithine)
rna	Ara-2	KDO-NAGLIPASYN-PWY	1.0149718436933086	superpathway of (KDO)<SUB>2</SUB>-lipid A biosynthesis
ribo	Ara-6	BETSYN-PWY	1.0144525957788595	glycine betaine biosynthesis I (Gram-negative bacteria)
rna	Ara+3	PWY-6277	1.0142728607427445	superpathway of 5-aminoimidazole ribonucleotide biosynthesis
ribo	Ara+3	PANTOSYN-PWY	1.0140630446770833	pantothenate and coenzyme A biosynthesis I
rna	Ara+3	GLYOXYLATE-BYPASS	1.0138001966546177	glyoxylate cycle
ribo	Ara+3	SALVPURINE2-PWY	1.0132161911635948	xanthine and xanthosine salvage
ribo	Ara+2	PWY0-981	1.0116420231333223	taurine degradation IV
ribo	Ara+5	VALSYN-PWY	1.0093694658126158	valine biosynthesis
ribo	Ara-3	ALADEG-PWY	1.0083410116757938	alanine degradation I
rna	Ara-1	ARG+POLYAMINE-SYN	1.008147579001871	superpathway of arginine and polyamine biosynthesis
ribo	Ara+1	VALSYN-PWY	1.007440640482447	valine biosynthesis
ribo	Ara+3	TYRSYN	1.007362816672149	tyrosine biosynthesis I
rna	Ara+3	PWY-6519	1.0070094271607017	8-amino-7-oxononanoate biosynthesis I
rna	Ara+1	GLUTAMINDEG-PWY	1.0065571489994776	glutamine degradation I
rna	Ara+1	GLUTAMINEFUM-PWY	1.0065571489994776	glutamine degradation II
rna	Ara+1	GLUTSYN-PWY	1.0065571489994776	glutamate biosynthesis I
rna	Ara+1	GLUTSYNIII-PWY	1.0065571489994776	glutamate biosynthesis III
ribo	Ara+1	ORNDEG-PWY	1.0061017979737983	superpathway of ornithine degradation
ribo	Ara-3	PWY-5484	1.005794322863244	glycolysis II (from fructose-6P)
ribo	Ara-2	VALSYN-PWY	1.0055399253110053	valine biosynthesis
ribo	Ara-1	ARG+POLYAMINE-SYN	1.0054729498510635	superpathway of arginine and polyamine biosynthesis
ribo	Ara+1	PWY0-541	1.0047999122164784	cyclopropane fatty acid (CFA) biosynthesis
rna	Ara-5	PWY0-1021	1.0042759790802926	alanine biosynthesis III
rna	Ara+5	ALANINE-SYN2-PWY	1.0041195351023724	alanine biosynthesis II
rna	Ara+3	TCA-GLYOX-BYPASS	1.00368208867644	superpathway of glyoxylate bypass and TCA
rna	Ara-4	BRANCHED-CHAIN-AA-SYN-PWY	1.0036615845694583	superpathway of leucine, valine, and isoleucine biosynthesis
ribo	Ara-5	METSYN-PWY	1.0035668705975969	homoserine and methionine biosynthesis
rna	Ara+4	LPSSYN-PWY	1.0031128468754065	superpathway of lipopolysaccharide biosynthesis
rna	Ara-1	PWY-7220	1.0029575509429483	adenosine deoxyribonucleotides <i>de novo</i> biosynthesis II
rna	Ara-1	PWY-7222	1.0029575509429483	guanosine deoxyribonucleotides <i>de novo</i> biosynthesis II
ribo	Ara+5	CYSTSYN-PWY	1.0028628079251023	cysteine biosynthesis I
rna	Ara-4	THREOCAT-PWY	1.0011542997006213	superpathway of threonine metabolism
ribo	Ara-2	PYRIDNUCSYN-PWY	1.001147436179215	NAD biosynthesis I (from aspartate)
rna	Ara+3	PWY0-1061	1.0001615118326168	superpathway of alanine biosynthesis
rna	Ara-3	PWY-6151	0.9995021754552256	<i>S</i>-adenosyl-L-methionine cycle I
ribo	Ara+3	THIOREDOX-PWY	0.999041964889805	thioredoxin pathway
ribo	Ara-2	FAO-PWY	0.9984825982204444	fatty acid &beta;-oxidation I
ribo	Ara-2	THREOCAT-PWY	0.9982166078929222	superpathway of threonine metabolism
ribo	Ara-3	PWY-5686	0.9974644169522054	UMP biosynthesis
ribo	Ara+1	PUTDEG-PWY	0.9972904067549851	putrescine degradation I
ribo	Ara+3	PWY-6579	0.9970718321018134	superpathway of guanine and guanosine salvage
rna	Ara+4	BETSYN-PWY	0.9970273550219649	glycine betaine biosynthesis I (Gram-negative bacteria)
ribo	Ara+3	PWY-6121	0.995961752353322	5-aminoimidazole ribonucleotide biosynthesis I
rna	Ara+4	NONMEVIPP-PWY	0.9941783636985493	methylerythritol phosphate pathway
ribo	Ara-6	ARG+POLYAMINE-SYN	0.9938545865065498	superpathway of arginine and polyamine biosynthesis
ribo	Ara+2	PWY-6164	0.9936528431455873	3-dehydroquinate biosynthesis I
ribo	Ara-5	PWY-5485	0.9934273707891265	pyruvate fermentation to acetate IV
ribo	Ara-5	PWY0-1312	0.9934273707891265	acetate formation from acetyl-CoA I
ribo	Ara-6	GLUAMCAT-PWY	0.9932745384249769	<i>N</i>-acetylglucosamine degradation I
rna	Ara+4	PUTDEG-PWY	0.9931510483263036	putrescine degradation I
rna	Ara-2	SO4ASSIM-PWY	0.9930892970496927	sulfate reduction I (assimilatory)
rna	Ara-3	PWY0-1329	0.9918570975001796	succinate to cytochrome <i>bo</i> oxidase electron transfer
rna	Ara-3	PWY0-1353	0.9918570975001796	succinate to cytochrome <i>bd</i> oxidase electron transfer
ribo	Ara-4	PWY0-1021	0.9913109369193854	alanine biosynthesis III
rna	Ara-3	FASYN-ELONG-PWY	0.990947255044349	fatty acid elongation -- saturated
ribo	Ara-5	PWY-5437	0.9906491410044449	threonine degradation I
rna	Ara+5	DENOVOPURINE2-PWY	0.989434505670973	superpathway of purine nucleotides <i>de novo</i> biosynthesis II
ribo	Ara+2	PWY-5485	0.9884315581023134	pyruvate fermentation to acetate IV
ribo	Ara+2	PWY0-1312	0.9884315581023134	acetate formation from acetyl-CoA I
rna	Ara-2	PWY-5686	0.9862877136876572	UMP biosynthesis
rna	Ara-4	ARGSYN-PWY	0.9861626768023232	arginine biosynthesis I (via L-ornithine)
rna	Ara-3	PWY-6282	0.9859217791011641	palmitoleate biosynthesis I
rna	Ara-4	GLUTORN-PWY	0.9857231682258841	ornithine biosynthesis
rna	Ara-1	PWY-6125	0.9853284933917081	superpathway of guanosine nucleotides <i>de novo</i> biosynthesis II
ribo	Ara-3	GLYCOLYSIS	0.9849281685309734	glycolysis I (from glucose-6P)
rna	Ara-3	PWY-6519	0.9846337323943293	8-amino-7-oxononanoate biosynthesis I
rna	Ara+2	LEUSYN-PWY	0.9835725500322593	leucine biosynthesis
ribo	Ara-1	PWY0-781	0.9835499568803223	aspartate superpathway
rna	Ara-2	PWY-5350	0.9832936862900912	thiosulfate disproportionation III (rhodanese)
ribo	Ara-1	PWY-5148	0.9824464162898536	acyl-CoA hydrolysis
ribo	Ara+3	PWY-5148	0.981759690652924	acyl-CoA hydrolysis
rna	Ara+1	PWY0-1479	0.9814268963189042	tRNA processing
rna	Ara-2	ILEUSYN-PWY	0.9806581998533348	isoleucine biosynthesis I (from threonine)
rna	Ara+2	ETOH-ACETYLCOA-ANA-PWY	0.9806107624529652	ethanol degradation I
rna	Ara+2	PWY-5480	0.9806107624529652	pyruvate fermentation to ethanol I
rna	Ara+2	PWY-6028	0.9806107624529652	acetoin degradation
ribo	Ara+3	PWY-6535	0.9800712539979433	4-aminobutyrate degradation
rna	Ara+2	PWY0-1061	0.9793890675201286	superpathway of alanine biosynthesis
rna	Ara-2	PWY-6163	0.9783410654262387	chorismate biosynthesis from 3-dehydroquinate
ribo	Ara-3	DENOVOPURINE2-PWY	0.9780475774080228	superpathway of purine nucleotides <i>de novo</i> biosynthesis II
ribo	Ara-5	MET-SAM-PWY	0.9779373100027973	superpathway of <i>S</i>-adenosyl-L-methionine biosynthesis
ribo	Ara-6	GLUTDEG-PWY	0.9778886343971068	glutamate degradation II
ribo	Ara+3	PWY-7247	0.9775507998127184	&beta;-D-glucuronide and D-glucuronate degradation
ribo	Ara-5	PWY0-1348	0.977548987218029	NADH to dimethyl sulfoxide electron transfer
ribo	Ara-5	PWY0-1356	0.977548987218029	formate to dimethyl sulfoxide electron transfer
rna	Ara-1	SERDEG-PWY	0.9775077199321625	L-serine degradation
ribo	Ara-2	PWY0-162	0.9772906071856413	superpathway of pyrimidine ribonucleotides <i>de novo</i> biosynthesis
rna	Ara-2	GALACTUROCAT-PWY	0.9763969438871811	D-galacturonate degradation I
ribo	Ara-2	PWY0-1325	0.9758101291408202	superpathway of asparagine biosynthesis
ribo	Ara-4	PWY0-781	0.9753681294878199	aspartate superpathway
ribo	Ara+3	TCA-GLYOX-BYPASS	0.9752969940610053	superpathway of glyoxylate bypass and TCA
rna	Ara+3	PWY0-1544	0.9746582925873954	proline to cytochrome <i>bo</i> oxidase electron transfer
ribo	Ara-5	CYSTSYN-PWY	0.9743613362933591	cysteine biosynthesis I
rna	Ara+2	TRESYN-PWY	0.9737785354412147	trehalose biosynthesis I
rna	Ara-4	PWY0-781	0.973390505378044	aspartate superpathway
rna	Ara-4	PWY-6952	0.9731478487565108	glycerophosphodiester degradation
ribo	Ara-4	PWY0-1329	0.9724781556470442	succinate to cytochrome <i>bo</i> oxidase electron transfer
ribo	Ara-4	PWY0-1353	0.9724781556470442	succinate to cytochrome <i>bd</i> oxidase electron transfer
ribo	Ara+2	ALANINE-VALINESYN-PWY	0.972214290037051	alanine biosynthesis I
ribo	Ara-2	KDO-NAGLIPASYN-PWY	0.9719782163159165	superpathway of (KDO)<SUB>2</SUB>-lipid A biosynthesis
rna	Ara+1	PWY-6620	0.970702951562538	guanine and guanosine salvage
rna	Ara+1	SALVPURINE2-PWY	0.970702951562538	xanthine and xanthosine salvage
ribo	Ara+2	PWY0-1061	0.9706335237150363	superpathway of alanine biosynthesis
ribo	Ara+5	ASPARAGINESYN-PWY	0.969471412450558	asparagine biosynthesis II
ribo	Ara+4	PWY-5686	0.9693040648067565	UMP biosynthesis
rna	Ara-2	PWY0-1336	0.9689427484758742	NADH to fumarate electron transfer
ribo	Ara+1	BRANCHED-CHAIN-AA-SYN-PWY	0.9686512096013029	superpathway of leucine, valine, and isoleucine biosynthesis
rna	Ara-3	PWY-5973	0.9686290904838212	<i>cis</i>-vaccenate biosynthesis
ribo	Ara-5	PWY0-1305	0.9682591618924956	glutamate dependent acid resistance
rna	Ara+4	IDNCAT-PWY	0.9678891756190645	L-idonate degradation
ribo	Ara+3	PWY-7187	0.9678219485470898	pyrimidine deoxyribonucleotides <i>de novo</i> biosynthesis II
rna	Ara-5	PWY0-1325	0.9675581461924686	superpathway of asparagine biosynthesis
rna	Ara-1	PWY-7221	0.9673782253005647	guanosine ribonucleotides <i>de novo</i> biosynthesis
rna	Ara-2	PWY-6629	0.9673641915367984	superpathway of tryptophan biosynthesis
rna	Ara+5	PRPP-PWY	0.9663046052583659	superpathway of histidine, purine, and pyrimidine biosynthesis
rna	Ara-2	PWY0-501	0.9662602830982449	lipoate biosynthesis and incorporation I
rna	Ara-2	SULFATE-CYS-PWY	0.9662518546291079	superpathway of sulfate assimilation and cysteine biosynthesis
ribo	Ara-5	PWY0-1221	0.9653015701706252	putrescine degradation II
ribo	Ara+1	PWY0-521	0.9649542660106635	fructoselysine and psicoselysine degradation
ribo	Ara-4	THREOCAT-PWY	0.9646009191438278	superpathway of threonine metabolism
rna	Ara+5	METHGLYUT-PWY	0.9644365174305775	superpathway of methylglyoxal degradation
rna	Ara+3	PWY-6122	0.964420821560444	5-aminoimidazole ribonucleotide biosynthesis II
rna	Ara-1	PWY0-1479	0.9642032272364655	tRNA processing
ribo	Ara-4	HOMOSER-METSYN-PWY	0.9641389190086143	methionine biosynthesis I
rna	Ara-3	PYRIDNUCSYN-PWY	0.963451403277704	NAD biosynthesis I (from aspartate)
rna	Ara-3	PWY-6284	0.9626778402658579	superpathway of unsaturated fatty acids biosynthesis (<i>E. coli</i>)
rna	Ara-1	PWY-6123	0.9623069928969378	inosine-5'-phosphate biosynthesis I
rna	Ara-2	PWY0-1275	0.9619146302247756	lipoate biosynthesis and incorporation II
rna	Ara-5	PWY-5485	0.9610502496444486	pyruvate fermentation to acetate IV
rna	Ara-5	PWY0-1312	0.9610502496444486	acetate formation from acetyl-CoA I
rna	Ara-6	BSUBPOLYAMSYN-PWY	0.9606237503979268	spermidine biosynthesis I
ribo	Ara-4	PWY-5686	0.9586920347252914	UMP biosynthesis
rna	Ara+4	TCA	0.9581484069709431	TCA cycle I (prokaryotic)
rna	Ara+5	PWY0-1348	0.9579558962539688	NADH to dimethyl sulfoxide electron transfer
rna	Ara+5	PWY0-1356	0.9579558962539688	formate to dimethyl sulfoxide electron transfer
rna	Ara-3	PWY-5484	0.9576538027375774	glycolysis II (from fructose-6P)
rna	Ara+1	LEUSYN-PWY	0.957401362711113	leucine biosynthesis
rna	Ara+2	PWY0-1317	0.9558065105382082	L-lactaldehyde degradation (aerobic)
ribo	Ara+3	GLYOXYLATE-BYPASS	0.9554387204145747	glyoxylate cycle
rna	Ara-1	METSYN-PWY	0.9553903969647388	homoserine and methionine biosynthesis
ribo	Ara+4	KDO-NAGLIPASYN-PWY	0.9548719936558024	superpathway of (KDO)<SUB>2</SUB>-lipid A biosynthesis
rna	Ara-1	PWY-6609	0.9543372200250599	adenine and adenosine salvage III
ribo	Ara-1	HISTSYN-PWY	0.9534500542094794	histidine biosynthesis
rna	Ara-5	PWY-5437	0.9525686446197444	threonine degradation I
rna	Ara+3	PWY0-42	0.9520746218539274	2-methylcitrate cycle I
rna	Ara-2	PWY0-1301	0.95205723359117	melibiose degradation
ribo	Ara-3	PWY-7335	0.9516030150971109	UDP-<i>N</i>-acetyl-&alpha;-D-mannosaminouronate biosynthesis
ribo	Ara+2	PWY-5686	0.9515996063104957	UMP biosynthesis
ribo	Ara-2	PWY-6629	0.9514646744613559	superpathway of tryptophan biosynthesis
rna	Ara-2	LPSSYN-PWY	0.9513927466211949	superpathway of lipopolysaccharide biosynthesis
ribo	Ara+1	DETOX1-PWY	0.9504186509979919	superoxide radicals degradation
ribo	Ara-1	METSYN-PWY	0.949684791539699	homoserine and methionine biosynthesis
rna	Ara-5	PWY-6609	0.9494405998305219	adenine and adenosine salvage III
ribo	Ara+3	TRPSYN-PWY	0.9491756280934853	tryptophan biosynthesis
rna	Ara-4	AMMASSIM-PWY	0.9491673570500803	ammonia assimilation cycle III
rna	Ara+2	PWY0-781	0.9486030812723864	aspartate superpathway
ribo	Ara+3	PWY-5686	0.9485350188870937	UMP biosynthesis
rna	Ara-2	PHESYN	0.9484732759014849	phenylalanine biosynthesis I
rna	Ara+5	GLYCLEAV-PWY	0.947761235907473	glycine cleavage
rna	Ara+2	PWY-4261	0.947166010822969	glycerol degradation I
rna	Ara+4	THRDLCTCAT-PWY	0.9466137036158937	threonine degradation III (to methylglyoxal)
ribo	Ara+3	PWY0-1061	0.9464807711761888	superpathway of alanine biosynthesis
rna	Ara-3	GLYCOLYSIS	0.9464762580586431	glycolysis I (from glucose-6P)
rna	Ara+1	PWY-5194	0.9461827905763516	siroheme biosynthesis
rna	Ara-2	PYRUVOX-PWY	0.9454379882865012	pyruvate oxidation pathway
rna	Ara+4	ARG+POLYAMINE-SYN	0.9451445438123086	superpathway of arginine and polyamine biosynthesis
rna	Ara-5	HEME-BIOSYNTHESIS-II	0.9449701201607137	heme biosynthesis from uroporphyrinogen-III I (aerobic)
ribo	Ara-5	PYRUVDEHYD-PWY	0.9443310154967242	pyruvate decarboxylation to acetyl CoA
rna	Ara+3	PYRUVOX-PWY	0.94419915971299	pyruvate oxidation pathway
ribo	Ara-5	AMMASSIM-PWY	0.9436718551773047	ammonia assimilation cycle III
rna	Ara-1	SULFATE-CYS-PWY	0.9426994222700048	superpathway of sulfate assimilation and cysteine biosynthesis
ribo	Ara+2	LEUSYN-PWY	0.9421026702723959	leucine biosynthesis
ribo	Ara+2	PWY0-781	0.9419932386843208	aspartate superpathway
ribo	Ara+4	POLYAMSYN-PWY	0.941854008008039	superpathway of polyamine biosynthesis I
rna	Ara-5	PWY0-1479	0.9417444677286974	tRNA processing
ribo	Ara-1	PWY0-163	0.9415300382142779	salvage pathways of pyrimidine ribonucleotides
ribo	Ara+2	KDO-LIPASYN-PWY	0.9412038766334928	(KDO)<sub>2</sub>-lipid A biosynthesis I
rna	Ara-6	HISTSYN-PWY	0.9397895857810835	histidine biosynthesis
rna	Ara-4	THRDLCTCAT-PWY	0.9392701348156292	threonine degradation III (to methylglyoxal)
ribo	Ara+1	PWY-6892	0.9391320870188442	thiazole biosynthesis I (E. coli)
ribo	Ara+2	TRESYN-PWY	0.938711831449614	trehalose biosynthesis I
rna	Ara+3	PUTDEG-PWY	0.9386346442252277	putrescine degradation I
rna	Ara-3	PWY0-1297	0.9376667353210382	superpathway of purine deoxyribonucleosides degradation
ribo	Ara-3	PWY-6028	0.9375092877811968	acetoin degradation
ribo	Ara-4	DENOVOPURINE2-PWY	0.9372800847675791	superpathway of purine nucleotides <i>de novo</i> biosynthesis II
ribo	Ara+5	TRPSYN-PWY	0.9371528517001129	tryptophan biosynthesis
ribo	Ara-4	DARABCAT-PWY	0.936163790235884	D-arabinose degradation II
rna	Ara+5	CYSTSYN-PWY	0.9361007185120328	cysteine biosynthesis I
ribo	Ara+1	PWY-6620	0.9360990696236018	guanine and guanosine salvage
ribo	Ara+2	PWY-7187	0.9360732716904725	pyrimidine deoxyribonucleotides <i>de novo</i> biosynthesis II
rna	Ara-5	PWY0-1221	0.9359240197149211	putrescine degradation II
rna	Ara+5	SAM-PWY	0.9355194060422192	S-adenosyl-L-methionine biosynthesis
rna	Ara-1	PWY0-166	0.9346545830146958	superpathway of pyrimidine deoxyribonucleotides <i>de novo</i> biosynthesis (E. coli)
rna	Ara-1	LCYSDEG-PWY	0.9346082923350092	L-cysteine degradation II
ribo	Ara+5	ARG+POLYAMINE-SYN	0.934004007607808	superpathway of arginine and polyamine biosynthesis
ribo	Ara+3	PWY-5484	0.9333574037473338	glycolysis II (from fructose-6P)
ribo	Ara+3	GLYCOLYSIS-TCA-GLYOX-BYPASS	0.9328137846246718	superpathway of glycolysis, pyruvate dehydrogenase, TCA, and glyoxylate bypass
rna	Ara+5	PUTDEG-PWY	0.932771869385112	putrescine degradation I
ribo	Ara+5	MANNIDEG-PWY	0.9322359760537252	mannitol degradation I
rna	Ara-2	GALACT-GLUCUROCAT-PWY	0.9317760275112444	superpathway of hexuronide and hexuronate degradation
ribo	Ara+2	DARABCAT-PWY	0.9312090943399984	D-arabinose degradation II
ribo	Ara-4	BSUBPOLYAMSYN-PWY	0.9311602604176292	spermidine biosynthesis I
ribo	Ara-4	ACETOACETATE-DEG-PWY	0.9308554287759515	acetoacetate degradation (to acetyl CoA)
rna	Ara-2	BIOTIN-BIOSYNTHESIS-PWY	0.929638615593576	biotin biosynthesis I
rna	Ara-1	LPSSYN-PWY	0.9295908703083866	superpathway of lipopolysaccharide biosynthesis
rna	Ara+5	ARGSYN-PWY	0.9295053376154236	arginine biosynthesis I (via L-ornithine)
ribo	Ara-3	PWY0-42	0.9294330514749162	2-methylcitrate cycle I
ribo	Ara+3	GLUCONEO-PWY	0.9277263305203294	gluconeogenesis I
ribo	Ara-1	PWY-5350	0.927309500250741	thiosulfate disproportionation III (rhodanese)
ribo	Ara+3	GLYCOLYSIS	0.9271890325468917	glycolysis I (from glucose-6P)
rna	Ara-5	HEMESYN2-PWY	0.9262376661893191	heme biosynthesis from uroporphyrinogen-III II (anaerobic)
rna	Ara-1	PWY0-1313	0.926209214548536	acetate conversion to acetyl-CoA
ribo	Ara+3	ALANINE-SYN2-PWY	0.9251739655010578	alanine biosynthesis II
rna	Ara+1	ILEUSYN-PWY	0.9248818193861235	isoleucine biosynthesis I (from threonine)
ribo	Ara+2	PWY0-301	0.9247201433148952	L-ascorbate degradation I (bacterial, anaerobic)
rna	Ara-2	PWY0-1466	0.9242454861256472	trehalose degradation VI (periplasmic)
rna	Ara-5	METSYN-PWY	0.9233273229294833	homoserine and methionine biosynthesis
ribo	Ara-4	PWY0-162	0.9230940758826566	superpathway of pyrimidine ribonucleotides <i>de novo</i> biosynthesis
rna	Ara-2	PWY0-1545	0.9230016855988019	cardiolipin biosynthesis III
ribo	Ara-5	PYRIDNUCSYN-PWY	0.9227283590549878	NAD biosynthesis I (from aspartate)
ribo	Ara-2	PWY-6163	0.9225010746778318	chorismate biosynthesis from 3-dehydroquinate
rna	Ara+1	PWY0-1305	0.9220930124691784	glutamate dependent acid resistance
rna	Ara-3	SAM-PWY	0.921886565272964	S-adenosyl-L-methionine biosynthesis
ribo	Ara-4	BRANCHED-CHAIN-AA-SYN-PWY	0.9217946107220154	superpathway of leucine, valine, and isoleucine biosynthesis
rna	Ara-3	PWY0-1296	0.921724505120811	purine ribonucleosides degradation
rna	Ara-3	PWY0-862	0.9215372227576338	<i>cis</i>-dodecenoyl biosynthesis
rna	Ara-5	PWY-4261	0.9214499771699419	glycerol degradation I
ribo	Ara-2	PWY-5084	0.9203525791090872	2-oxoglutarate decarboxylation to succinyl-CoA
ribo	Ara+3	ARG+POLYAMINE-SYN	0.9198956363249713	superpathway of arginine and polyamine biosynthesis
rna	Ara+3	GLYCOLYSIS-TCA-GLYOX-BYPASS	0.9188057796095308	superpathway of glycolysis, pyruvate dehydrogenase, TCA, and glyoxylate bypass
rna	Ara-3	PWY-6556	0.9183006373942874	pyrimidine ribonucleosides salvage II
rna	Ara-2	PANTO-PWY	0.9179936244431929	phosphopantothenate biosynthesis I
ribo	Ara-5	VALSYN-PWY	0.9177706347084037	valine biosynthesis
ribo	Ara-2	BSUBPOLYAMSYN-PWY	0.917114058724705	spermidine biosynthesis I
rna	Ara-5	GLYCOLYSIS-TCA-GLYOX-BYPASS	0.9165664362268859	superpathway of glycolysis, pyruvate dehydrogenase, TCA, and glyoxylate bypass
ribo	Ara+5	PWY-5705	0.9159331194070109	allantoin degradation to glyoxylate III
ribo	Ara-1	PWY-6772	0.9157058070492412	hydrogen production V
rna	Ara-4	PWY0-1348	0.9155392991247108	NADH to dimethyl sulfoxide electron transfer
rna	Ara-4	PWY0-1356	0.9155392991247108	formate to dimethyl sulfoxide electron transfer
rna	Ara+1	BRANCHED-CHAIN-AA-SYN-PWY	0.9144869063927775	superpathway of leucine, valine, and isoleucine biosynthesis
ribo	Ara-2	ASPASN-PWY	0.9143542698276401	superpathway of aspartate and asparagine biosynthesis; interconversion of aspartate and asparagine
rna	Ara+5	BRANCHED-CHAIN-AA-SYN-PWY	0.9141598216465101	superpathway of leucine, valine, and isoleucine biosynthesis
rna	Ara+3	DENOVOPURINE2-PWY	0.9140384488341239	superpathway of purine nucleotides <i>de novo</i> biosynthesis II
rna	Ara+1	DETOX1-PWY	0.9135689743612785	superoxide radicals degradation
rna	Ara+2	PWY0-981	0.9123618355889273	taurine degradation IV
ribo	Ara+1	KDOSYN-PWY	0.9121498282870651	KDO transfer to lipid IV<sub>A</sub> I
ribo	Ara-2	ILEUSYN-PWY	0.9115837751965771	isoleucine biosynthesis I (from threonine)
ribo	Ara-2	PWY-6609	0.9114415791477077	adenine and adenosine salvage III
rna	Ara-3	HOMOSER-METSYN-PWY	0.910750142788505	methionine biosynthesis I
ribo	Ara+5	KDO-LIPASYN-PWY	0.9105320396704528	(KDO)<sub>2</sub>-lipid A biosynthesis I
rna	Ara-2	THREOCAT-PWY	0.9096988239673336	superpathway of threonine metabolism
ribo	Ara-1	PHESYN	0.9094169465831964	phenylalanine biosynthesis I
ribo	Ara-3	HEXITOLDEGSUPER-PWY	0.9091901056351119	superpathway of hexitol degradation (bacteria)
rna	Ara+4	PWY0-1466	0.9086339132798452	trehalose degradation VI (periplasmic)
rna	Ara-2	PWY-5852	0.9080904454241082	demethylmenaquinol-8 biosynthesis I
ribo	Ara+5	FUC-RHAMCAT-PWY	0.907703974651971	superpathway of fucose and rhamnose degradation
rna	Ara+3	ARG+POLYAMINE-SYN	0.9074566286582081	superpathway of arginine and polyamine biosynthesis
rna	Ara-5	PWY0-501	0.9069291829197128	lipoate biosynthesis and incorporation I
ribo	Ara-2	KDOSYN-PWY	0.9064432954072492	KDO transfer to lipid IV<sub>A</sub> I
rna	Ara-1	DENOVOPURINE2-PWY	0.905997670402037	superpathway of purine nucleotides <i>de novo</i> biosynthesis II
rna	Ara-2	PWY-4261	0.9057326537542704	glycerol degradation I
rna	Ara-5	GLYCLEAV-PWY	0.9052942541108148	glycine cleavage
rna	Ara-5	PWY-5084	0.9052942541108148	2-oxoglutarate decarboxylation to succinyl-CoA
rna	Ara-4	PWY-5350	0.9048543132021843	thiosulfate disproportionation III (rhodanese)
ribo	Ara+2	ACETOACETATE-DEG-PWY	0.9042918667894491	acetoacetate degradation (to acetyl CoA)
rna	Ara-3	AMMASSIM-PWY	0.904171892075829	ammonia assimilation cycle III
ribo	Ara-3	ETOH-ACETYLCOA-ANA-PWY	0.9040072238988681	ethanol degradation I
ribo	Ara-3	PWY-5480	0.9040072238988681	pyruvate fermentation to ethanol I
ribo	Ara-6	POLYAMSYN-PWY	0.9033621230031156	superpathway of polyamine biosynthesis I
ribo	Ara-5	BIOTIN-BIOSYNTHESIS-PWY	0.9032508431999642	biotin biosynthesis I
rna	Ara-1	MET-SAM-PWY	0.9029726424054433	superpathway of <i>S</i>-adenosyl-L-methionine biosynthesis
ribo	Ara-1	PWY0-1303	0.9029335557478597	aminopropylcadaverine biosynthesis
rna	Ara+4	PWY-6608	0.9028893160968675	guanosine nucleotides degradation III
rna	Ara-3	PWY0-1182	0.9027263063600074	trehalose degradation II (trehalase)
rna	Ara+1	PWY0-1182	0.9022018110885636	trehalose degradation II (trehalase)
ribo	Ara-1	HOMOSER-THRESYN-PWY	0.9020682647931799	threonine biosynthesis from homoserine
ribo	Ara+2	METHGLYUT-PWY	0.9014619527505159	superpathway of methylglyoxal degradation
rna	Ara-1	ACETATEUTIL-PWY	0.901429917639973	superpathway of acetate utilization and formation
rna	Ara-1	ALANINE-VALINESYN-PWY	0.9012723781099506	alanine biosynthesis I
rna	Ara-1	PHESYN	0.9008106599445648	phenylalanine biosynthesis I
ribo	Ara-2	SULFATE-CYS-PWY	0.9000548380512443	superpathway of sulfate assimilation and cysteine biosynthesis
ribo	Ara-2	UDPNAGSYN-PWY	0.8995495231005665	UDP-<i>N</i>-acetyl-D-glucosamine biosynthesis I
rna	Ara-3	DENOVOPURINE2-PWY	0.8980530229123406	superpathway of purine nucleotides <i>de novo</i> biosynthesis II
rna	Ara-5	MET-SAM-PWY	0.8975303742918491	superpathway of <i>S</i>-adenosyl-L-methionine biosynthesis
ribo	Ara+3	PWY-6823	0.8971078283606515	molybdenum cofactor biosynthesis
rna	Ara+5	PWY0-1527	0.8965269248573956	curcumin degradation
ribo	Ara-4	PWY0-1479	0.8960995889576387	tRNA processing
rna	Ara-5	ALADEG-PWY	0.895829475630835	alanine degradation I
rna	Ara-5	PWY0-781	0.8957187969430421	aspartate superpathway
ribo	Ara-1	MET-SAM-PWY	0.8957186515589618	superpathway of <i>S</i>-adenosyl-L-methionine biosynthesis
ribo	Ara-4	ARGSYN-PWY	0.8956800963599364	arginine biosynthesis I (via L-ornithine)
ribo	Ara+1	ACETATEUTIL-PWY	0.8953149761488806	superpathway of acetate utilization and formation
ribo	Ara-6	COLANSYN-PWY	0.8950032057718654	colanic acid building blocks biosynthesis
ribo	Ara+1	HOMOSER-THRESYN-PWY	0.8943210607148847	threonine biosynthesis from homoserine
ribo	Ara-4	PWY0-981	0.8941010385688628	taurine degradation IV
ribo	Ara+1	ALL-CHORISMATE-PWY	0.8936951956491971	superpathway of chorismate metabolism
ribo	Ara+2	HOMOSER-METSYN-PWY	0.8935168764328342	methionine biosynthesis I
rna	Ara+3	NONOXIPENT-PWY	0.8927893839135952	pentose phosphate pathway (non-oxidative branch)
ribo	Ara+4	PWY-5966	0.8925888577990968	fatty acid biosynthesis initiation II
rna	Ara+5	GLYCEROLMETAB-PWY	0.8923442689846245	glycerol degradation V
ribo	Ara+4	ARG+POLYAMINE-SYN	0.8922666408230426	superpathway of arginine and polyamine biosynthesis
ribo	Ara-6	KDO-LIPASYN-PWY	0.8922125464853141	(KDO)<sub>2</sub>-lipid A biosynthesis I
rna	Ara-2	PWY0-1299	0.8919184235154977	arginine dependent acid resistance
rna	Ara+1	PWY-6164	0.8917993869200428	3-dehydroquinate biosynthesis I
rna	Ara+3	1CMET2-PWY	0.891488404599376	formylTHF biosynthesis
[truncated: 5,877 more rows]
