# Supplementary material for: The landscape of transcriptional and translational changes over 22 years of bacterial adaptation
Source: eLife. 2022 Oct 10;11:e81979. doi: 10.7554/eLife.81979 (PMC9645810; doi:10.7554/eLife.81979)
Supplement: Supplementary file 12. — This file is supplied and not generated from the code or can be downloaded from the website. [file elife-81979-supp12.csv]

X1	treatment	population	time	strain	clone	mutator_status	type	start_position	end_position	gene_position	html_position	html_mutation	html_mutation_annotation	gene_list	gene_name	html_gene_name	gene_product	html_gene_product	locus_tag	mutation_category	snp_type	clone_id
2748	LTEE	Ara-1	50000	REL11330	A	point-mutator	SNP	841	841	506	841	A&rarr;C	<font class=snp_type_nonsynonymous>E169A</font>&nbsp;(G<font class=mutation_in_codon>A</font>G&rarr;G<font class=mutation_in_codon>C</font>G)&nbsp;	thrA	thrA	<i>thrA</i>&nbsp;&rarr;	bifunctional aspartokinase I/homeserine dehydrogenase I	bifunctional aspartokinase I/homeserine dehydrogenase I	ECB_00002	snp_nonsynonymous	nonsynonymous	11330
2749	LTEE	Ara-1	50000	REL11330	A	point-mutator	SNP	1615	1615	1280	1615	T&rarr;G	<font class=snp_type_nonsynonymous>I427S</font>&nbsp;(A<font class=mutation_in_codon>T</font>T&rarr;A<font class=mutation_in_codon>G</font>T)&nbsp;	thrA	thrA	<i>thrA</i>&nbsp;&rarr;	bifunctional aspartokinase I/homeserine dehydrogenase I	bifunctional aspartokinase I/homeserine dehydrogenase I	ECB_00002	snp_nonsynonymous	nonsynonymous	11330
2750	LTEE	Ara-1	50000	REL11330	A	point-mutator	SNP	12527	12527	367	12527	A&rarr;C	<font class=snp_type_nonsynonymous>M123L</font>&nbsp;(<font class=mutation_in_codon>A</font>TG&rarr;<font class=mutation_in_codon>C</font>TG)&nbsp;	dnaK	dnaK	<i>dnaK</i>&nbsp;&rarr;	molecular chaperone DnaK	molecular chaperone DnaK	ECB_00014	snp_nonsynonymous	nonsynonymous	11330
2751	LTEE	Ara-1	50000	REL11330	A	point-mutator	SNP	14590	14590	425	14590	A&rarr;C	<font class=snp_type_nonsynonymous>E142A</font>&nbsp;(G<font class=mutation_in_codon>A</font>A&rarr;G<font class=mutation_in_codon>C</font>A)&nbsp;	dnaJ	dnaJ	<i>dnaJ</i>&nbsp;&rarr;	chaperone Hsp40, co-chaperone with DnaK	chaperone Hsp40, co&#8209;chaperone with DnaK	ECB_00015	snp_nonsynonymous	nonsynonymous	11330
2752	LTEE	Ara-1	50000	REL11330	A	point-mutator	MOB	16972	16974	intergenic (-14/-514)	16972	IS<i>150</i>&nbsp;(&#8211;)&nbsp;+3&nbsp;bp	intergenic&nbsp;(&#8209;14/&#8209;514)	mokC,nhaA	mokC/nhaA	<i>mokC</i>&nbsp;&larr;&nbsp;/&nbsp;&rarr;&nbsp;<i>nhaA</i>	regulatory protein for HokC, overlaps CDS of hokC/pH-dependent sodium/proton antiporter	regulatory protein for HokC, overlaps CDS of hokC/pH&#8209;dependent sodium/proton antiporter	ECB_00017/ECB_00018	mobile_element_insertion	not_snp	11330
2753	LTEE	Ara-1	50000	REL11330	A	point-mutator	SNP	31535	31535	171	31535	T&rarr;G	<font class=snp_type_nonsynonymous>N57K</font>&nbsp;(AA<font class=mutation_in_codon>T</font>&rarr;AA<font class=mutation_in_codon>G</font>)&nbsp;	rihC	rihC	<i>rihC</i>&nbsp;&rarr;	ribonucleoside hydrolase 3	ribonucleoside hydrolase 3	ECB_00034	snp_nonsynonymous	nonsynonymous	11330
2754	LTEE	Ara-1	50000	REL11330	A	point-mutator	SNP	32319	32319	intergenic (+40/-127)	32319	A&rarr;C	intergenic&nbsp;(+40/&#8209;127)	rihC,dapB	rihC/dapB	<i>rihC</i>&nbsp;&rarr;&nbsp;/&nbsp;&rarr;&nbsp;<i>dapB</i>	ribonucleoside hydrolase 3/dihydrodipicolinate reductase	ribonucleoside hydrolase 3/dihydrodipicolinate reductase	ECB_00034/ECB_00035	snp_intergenic	intergenic	11330
2755	LTEE	Ara-1	50000	REL11330	A	point-mutator	SNP	37293	37293	2406	37293	T&rarr;G	<font class=snp_type_nonsynonymous>S802R</font>&nbsp;(AG<font class=mutation_in_codon>T</font>&rarr;AG<font class=mutation_in_codon>G</font>)&nbsp;	carB	carB	<i>carB</i>&nbsp;&rarr;	carbamoyl-phosphate synthase large subunit	carbamoyl&#8209;phosphate synthase large subunit	ECB_00037	snp_nonsynonymous	nonsynonymous	11330
2756	LTEE	Ara-1	50000	REL11330	A	point-mutator	SNP	39986	39986	479	39986	T&rarr;G	<font class=snp_type_nonsynonymous>N160T</font>&nbsp;(A<font class=mutation_in_codon>A</font>C&rarr;A<font class=mutation_in_codon>C</font>C)&nbsp;	caiD	caiD	<i>caiD</i>&nbsp;&larr;	carnitinyl-CoA dehydratase	carnitinyl&#8209;CoA dehydratase	ECB_00040	snp_nonsynonymous	nonsynonymous	11330
2757	LTEE	Ara-1	50000	REL11330	A	point-mutator	SNP	46353	46353	intergenic (-229/-245)	46353	T&rarr;C	intergenic&nbsp;(&#8209;229/&#8209;245)	caiT,fixA	caiT/fixA	<i>caiT</i>&nbsp;&larr;&nbsp;/&nbsp;&rarr;&nbsp;<i>fixA</i>	L-carnitine/gamma-butyrobetaine antiporter/predicted electron transfer flavoprotein subunit, ETFP adenine nucleotide-binding domain	L&#8209;carnitine/gamma&#8209;butyrobetaine antiporter/predicted electron transfer flavoprotein subunit, ETFP adenine nucleotide&#8209;binding domain	ECB_00044/ECB_00045	snp_intergenic	intergenic	11330
2758	LTEE	Ara-1	50000	REL11330	A	point-mutator	SNP	55552	55552	250	55552	T&rarr;G	<font class=snp_type_nonsynonymous>S84R</font>&nbsp;(<font class=mutation_in_codon>A</font>GC&rarr;<font class=mutation_in_codon>C</font>GC)&nbsp;	apaG	apaG	<i>apaG</i>&nbsp;&larr;	hypothetical protein	hypothetical protein	ECB_00054	snp_nonsynonymous	nonsynonymous	11330
2759	LTEE	Ara-1	50000	REL11330	A	point-mutator	SNP	58701	58701	197	58701	A&rarr;C	<font class=snp_type_nonsynonymous>L66R</font>&nbsp;(C<font class=mutation_in_codon>T</font>G&rarr;C<font class=mutation_in_codon>G</font>G)&nbsp;	surA	surA	<i>surA</i>&nbsp;&larr;	peptidyl-prolyl cis-trans isomerase (PPIase)	peptidyl&#8209;prolyl cis&#8209;trans isomerase (PPIase)	ECB_00057	snp_nonsynonymous	nonsynonymous	11330
2760	LTEE	Ara-1	50000	REL11330	A	point-mutator	SNP	59693	59693	1612	59693	A&rarr;C	<font class=snp_type_nonsynonymous>S538A</font>&nbsp;(<font class=mutation_in_codon>T</font>CT&rarr;<font class=mutation_in_codon>G</font>CT)&nbsp;	imp	imp	<i>imp</i>&nbsp;&larr;	organic solvent tolerance protein precursor	organic solvent tolerance protein precursor	ECB_00058	snp_nonsynonymous	nonsynonymous	11330
2761	LTEE	Ara-1	50000	REL11330	A	point-mutator	SNP	67987	67987	598	67987	T&rarr;G	<font class=snp_type_nonsynonymous>S200R</font>&nbsp;(<font class=mutation_in_codon>A</font>GC&rarr;<font class=mutation_in_codon>C</font>GC)&nbsp;	polB	polB	<i>polB</i>&nbsp;&larr;	DNA polymerase II	DNA polymerase II	ECB_00062	snp_nonsynonymous	nonsynonymous	11330
2762	LTEE	Ara-1	50000	REL11330	A	point-mutator	SNP	70484	70484	658	70484	A&rarr;C	<font class=snp_type_nonsynonymous>S220A</font>&nbsp;(<font class=mutation_in_codon>T</font>CC&rarr;<font class=mutation_in_codon>G</font>CC)&nbsp;	araA	araA	<i>araA</i>&nbsp;&larr;	L-arabinose isomerase	L&#8209;arabinose isomerase	ECB_00064	snp_nonsynonymous	nonsynonymous	11330
2763	LTEE	Ara-1	50000	REL11330	A	point-mutator	SNP	77408	77408	877	77408	A&rarr;C	<font class=snp_type_nonsynonymous>F293V</font>&nbsp;(<font class=mutation_in_codon>T</font>TT&rarr;<font class=mutation_in_codon>G</font>TT)&nbsp;	tbpA	tbpA	<i>tbpA</i>&nbsp;&larr;	thiamin transporter subunit	thiamin transporter subunit	ECB_00070	snp_nonsynonymous	nonsynonymous	11330
2764	LTEE	Ara-1	50000	REL11330	A	point-mutator	SNP	81102	81102	678	81102	A&rarr;C	<font class=snp_type_nonsynonymous>L226F</font>&nbsp;(TT<font class=mutation_in_codon>A</font>&rarr;TT<font class=mutation_in_codon>C</font>)&nbsp;	setA	setA	<i>setA</i>&nbsp;&rarr;	broad specificity sugar efflux system	broad specificity sugar efflux system	ECB_00072	snp_nonsynonymous	nonsynonymous	11330
2765	LTEE	Ara-1	50000	REL11330	A	point-mutator	SNP	83321	83321	348	83321	G&rarr;T	<font class=snp_type_synonymous>G116G</font>&nbsp;(GG<font class=mutation_in_codon>C</font>&rarr;GG<font class=mutation_in_codon>A</font>)&nbsp;	leuC	leuC	<i>leuC</i>&nbsp;&larr;	isopropylmalate isomerase large subunit	isopropylmalate isomerase large subunit	ECB_00074	snp_synonymous	synonymous	11330
2766	LTEE	Ara-1	50000	REL11330	A	point-mutator	SNP	90037	90037	1604	90037	T&rarr;G	<font class=snp_type_nonsynonymous>V535G</font>&nbsp;(G<font class=mutation_in_codon>T</font>G&rarr;G<font class=mutation_in_codon>G</font>G)&nbsp;	ilvI	ilvI	<i>ilvI</i>&nbsp;&rarr;	acetolactate synthase III large subunit	acetolactate synthase III large subunit	ECB_00079	snp_nonsynonymous	nonsynonymous	11330
2767	LTEE	Ara-1	50000	REL11330	A	point-mutator	SNP	92372	92372	intergenic (+536/-66)	92372	T&rarr;G	intergenic&nbsp;(+536/&#8209;66)	fruR,yabB	fruR/yabB	<i>fruR</i>&nbsp;&rarr;&nbsp;/&nbsp;&rarr;&nbsp;<i>yabB</i>	DNA-binding transcriptional dual regulator/hypothetical protein	DNA&#8209;binding transcriptional dual regulator/hypothetical protein	ECB_00081/ECB_00082	snp_intergenic	intergenic	11330
2768	LTEE	Ara-1	50000	REL11330	A	point-mutator	SNP	103062	103062	615	103062	T&rarr;G	<font class=snp_type_synonymous>A205A</font>&nbsp;(GC<font class=mutation_in_codon>T</font>&rarr;GC<font class=mutation_in_codon>G</font>)&nbsp;	murG	murG	<i>murG</i>&nbsp;&rarr;	N-acetylglucosaminyl transferase	N&#8209;acetylglucosaminyl transferase	ECB_00091	snp_synonymous	synonymous	11330
2769	LTEE	Ara-1	50000	REL11330	A	point-mutator	SNP	109022	109022	914	109022	A&rarr;C	<font class=snp_type_nonsynonymous>E305A</font>&nbsp;(G<font class=mutation_in_codon>A</font>G&rarr;G<font class=mutation_in_codon>C</font>G)&nbsp;	ftsZ	ftsZ	<i>ftsZ</i>&nbsp;&rarr;	cell division protein FtsZ	cell division protein FtsZ	ECB_00096	snp_nonsynonymous	nonsynonymous	11330
2770	LTEE	Ara-1	50000	REL11330	A	point-mutator	INS	114034	114034	coding (187/390 nt)	114034	(C)<sub>6&rarr;7</sub>	coding&nbsp;(187/390&nbsp;nt)	mutT	mutT	<i>mutT</i>&nbsp;&rarr;	nucleoside triphosphate pyrophosphohydrolase, marked preference for dGTP	nucleoside triphosphate pyrophosphohydrolase, marked preference for dGTP	ECB_00100	small_indel	not_snp	11330
2771	LTEE	Ara-1	50000	REL11330	A	point-mutator	SNP	116302	116302	55	116302	A&rarr;C	<font class=snp_type_nonsynonymous>K19Q</font>&nbsp;(<font class=mutation_in_codon>A</font>AA&rarr;<font class=mutation_in_codon>C</font>AA)&nbsp;	guaC	guaC	<i>guaC</i>&nbsp;&rarr;	guanosine 5'-monophosphate oxidoreductase	guanosine 5'&#8209;monophosphate oxidoreductase	ECB_00104	snp_nonsynonymous	nonsynonymous	11330
2772	LTEE	Ara-1	50000	REL11330	A	point-mutator	SNP	118051	118051	478	118051	T&rarr;G	<font class=snp_type_nonsynonymous>K160Q</font>&nbsp;(<font class=mutation_in_codon>A</font>AA&rarr;<font class=mutation_in_codon>C</font>AA)&nbsp;	hofC	hofC	<i>hofC</i>&nbsp;&larr;	assembly protein in type IV pilin biogenesis, transmembrane protein	assembly protein in type IV pilin biogenesis, transmembrane protein	ECB_00105	snp_nonsynonymous	nonsynonymous	11330
2773	LTEE	Ara-1	50000	REL11330	A	point-mutator	SNP	122775	122775	691	122775	T&rarr;G	<font class=snp_type_nonsynonymous>S231A</font>&nbsp;(<font class=mutation_in_codon>T</font>CG&rarr;<font class=mutation_in_codon>G</font>CG)&nbsp;	ampE	ampE	<i>ampE</i>&nbsp;&rarr;	predicted inner membrane protein	predicted inner membrane protein	ECB_00110	snp_nonsynonymous	nonsynonymous	11330
2774	LTEE	Ara-1	50000	REL11330	A	point-mutator	SNP	126070	126070	250	126070	T&rarr;G	<font class=snp_type_nonsynonymous>S84A</font>&nbsp;(<font class=mutation_in_codon>T</font>CA&rarr;<font class=mutation_in_codon>G</font>CA)&nbsp;	aceE	aceE	<i>aceE</i>&nbsp;&rarr;	pyruvate dehydrogenase subunit E1	pyruvate dehydrogenase subunit E1	ECB_00113	snp_nonsynonymous	nonsynonymous	11330
2775	LTEE	Ara-1	50000	REL11330	A	point-mutator	SNP	140021	140021	136	140021	A&rarr;C	<font class=snp_type_nonsynonymous>N46H</font>&nbsp;(<font class=mutation_in_codon>A</font>AT&rarr;<font class=mutation_in_codon>C</font>AT)&nbsp;	cueO	cueO	<i>cueO</i>&nbsp;&rarr;	multicopper oxidase (laccase)	multicopper oxidase (laccase)	ECB_00122	snp_nonsynonymous	nonsynonymous	11330
2776	LTEE	Ara-1	50000	REL11330	A	point-mutator	SNP	145773	145773	192	145773	A&rarr;C	<font class=snp_type_synonymous>V64V</font>&nbsp;(GT<font class=mutation_in_codon>A</font>&rarr;GT<font class=mutation_in_codon>C</font>)&nbsp;	yadG	yadG	<i>yadG</i>&nbsp;&rarr;	predicted transporter subunit: ATP-binding component of ABC superfamily	predicted transporter subunit: ATP&#8209;binding component of ABC superfamily	ECB_00126	snp_synonymous	synonymous	11330
2777	LTEE	Ara-1	50000	REL11330	A	point-mutator	SNP	146285	146285	704	146285	A&rarr;C	<font class=snp_type_nonsynonymous>D235A</font>&nbsp;(G<font class=mutation_in_codon>A</font>T&rarr;G<font class=mutation_in_codon>C</font>T)&nbsp;	yadG	yadG	<i>yadG</i>&nbsp;&rarr;	predicted transporter subunit: ATP-binding component of ABC superfamily	predicted transporter subunit: ATP&#8209;binding component of ABC superfamily	ECB_00126	snp_nonsynonymous	nonsynonymous	11330
2778	LTEE	Ara-1	50000	REL11330	A	point-mutator	SNP	150410	150410	640	150410	T&rarr;G	<font class=snp_type_nonsynonymous>Y214D</font>&nbsp;(<font class=mutation_in_codon>T</font>AT&rarr;<font class=mutation_in_codon>G</font>AT)&nbsp;	yadD	yadD	<i>yadD</i>&nbsp;&rarr;	predicted transposase	predicted transposase	ECB_00131	snp_nonsynonymous	nonsynonymous	11330
2779	LTEE	Ara-1	50000	REL11330	A	point-mutator	SNP	152863	152863	1001	152863	T&rarr;G	<font class=snp_type_nonsynonymous>N334T</font>&nbsp;(A<font class=mutation_in_codon>A</font>T&rarr;A<font class=mutation_in_codon>C</font>T)&nbsp;	yadC	yadC	<i>yadC</i>&nbsp;&larr;	predicted fimbrial-like adhesin protein	predicted fimbrial&#8209;like adhesin protein	ECB_00134	snp_nonsynonymous	nonsynonymous	11330
2780	LTEE	Ara-1	50000	REL11330	A	point-mutator	SNP	156770	156770	1501	156770	A&rarr;C	<font class=snp_type_nonsynonymous>S501A</font>&nbsp;(<font class=mutation_in_codon>T</font>CG&rarr;<font class=mutation_in_codon>G</font>CG)&nbsp;	htrE	htrE	<i>htrE</i>&nbsp;&larr;	predicted outer membrane usher protein	predicted outer membrane usher protein	ECB_00138	snp_nonsynonymous	nonsynonymous	11330
2781	LTEE	Ara-1	50000	REL11330	A	point-mutator	SNP	161041	161041	904	161041	T&rarr;G	<font class=snp_type_nonsynonymous>N302H</font>&nbsp;(<font class=mutation_in_codon>A</font>AC&rarr;<font class=mutation_in_codon>C</font>AC)&nbsp;	pcnB	pcnB	<i>pcnB</i>&nbsp;&larr;	poly(A) polymerase I	poly(A) polymerase I	ECB_00142	snp_nonsynonymous	nonsynonymous	11330
2782	LTEE	Ara-1	50000	REL11330	A	point-mutator	SNP	161258	161258	687	161258	A&rarr;C	<font class=snp_type_nonsynonymous>D229E</font>&nbsp;(GA<font class=mutation_in_codon>T</font>&rarr;GA<font class=mutation_in_codon>G</font>)&nbsp;	pcnB	pcnB	<i>pcnB</i>&nbsp;&larr;	poly(A) polymerase I	poly(A) polymerase I	ECB_00142	snp_nonsynonymous	nonsynonymous	11330
2783	LTEE	Ara-1	50000	REL11330	A	point-mutator	SNP	163500	163500	intergenic (-45/+133)	163500	A&rarr;C	intergenic&nbsp;(&#8209;45/+133)	dksA,sfsA	dksA/sfsA	<i>dksA</i>&nbsp;&larr;&nbsp;/&nbsp;&larr;&nbsp;<i>sfsA</i>	DNA-binding transcriptional regulator of rRNA transcription, DnaK suppressor protein/sugar fermentation stimulation protein A	DNA&#8209;binding transcriptional regulator of rRNA transcription, DnaK suppressor protein/sugar fermentation stimulation protein A	ECB_00144/ECB_00145	snp_intergenic	intergenic	11330
2784	LTEE	Ara-1	50000	REL11330	A	point-mutator	SNP	176408	176408	intergenic (+122/+36)	176408	A&rarr;C	intergenic&nbsp;(+122/+36)	fhuB,hemL	fhuB/hemL	<i>fhuB</i>&nbsp;&rarr;&nbsp;/&nbsp;&larr;&nbsp;<i>hemL</i>	fused iron-hydroxamate transporter subunits of ABC superfamily: membrane components/glutamate-1-semialdehyde aminotransferase	fused iron&#8209;hydroxamate transporter subunits of ABC superfamily: membrane components/glutamate&#8209;1&#8209;semialdehyde aminotransferase	ECB_00152/ECB_00153	snp_intergenic	intergenic	11330
2785	LTEE	Ara-1	50000	REL11330	A	point-mutator	SNP	178875	178875	927	178875	A&rarr;C	<font class=snp_type_synonymous>A309A</font>&nbsp;(GC<font class=mutation_in_codon>A</font>&rarr;GC<font class=mutation_in_codon>C</font>)&nbsp;	yadQ	yadQ	<i>yadQ</i>&nbsp;&rarr;	chloride channel protein	chloride channel protein	ECB_00154	snp_synonymous	synonymous	11330
2786	LTEE	Ara-1	50000	REL11330	A	point-mutator	SNP	184644	184644	919	184644	A&rarr;C	<font class=snp_type_nonsynonymous>K307Q</font>&nbsp;(<font class=mutation_in_codon>A</font>AA&rarr;<font class=mutation_in_codon>C</font>AA)&nbsp;	degP	degP	<i>degP</i>&nbsp;&rarr;	serine endoprotease (protease Do), membrane-associated	serine endoprotease (protease Do), membrane&#8209;associated	ECB_00160	snp_nonsynonymous	nonsynonymous	11330
2787	LTEE	Ara-1	50000	REL11330	A	point-mutator	SNP	200258	200258	871	200258	A&rarr;C	<font class=snp_type_nonsynonymous>S291R</font>&nbsp;(<font class=mutation_in_codon>A</font>GT&rarr;<font class=mutation_in_codon>C</font>GT)&nbsp;	yaeL	yaeL	<i>yaeL</i>&nbsp;&rarr;	zinc metallopeptidase	zinc metallopeptidase	ECB_00174	snp_nonsynonymous	nonsynonymous	11330
2788	LTEE	Ara-1	50000	REL11330	A	point-mutator	SNP	203759	203759	436	203759	A&rarr;C	<font class=snp_type_nonsynonymous>S146R</font>&nbsp;(<font class=mutation_in_codon>A</font>GC&rarr;<font class=mutation_in_codon>C</font>GC)&nbsp;	hlpA	hlpA	<i>hlpA</i>&nbsp;&rarr;	periplasmic chaperone	periplasmic chaperone	ECB_00176	snp_nonsynonymous	nonsynonymous	11330
2789	LTEE	Ara-1	50000	REL11330	A	point-mutator	SNP	212301	212301	839	212301	A&rarr;C	<font class=snp_type_nonsynonymous>E280A</font>&nbsp;(G<font class=mutation_in_codon>A</font>A&rarr;G<font class=mutation_in_codon>C</font>A)&nbsp;	accA	accA	<i>accA</i>&nbsp;&rarr;	acetyl-CoA carboxylase subunit alpha	acetyl&#8209;CoA carboxylase subunit alpha	ECB_00183	snp_nonsynonymous	nonsynonymous	11330
2790	LTEE	Ara-1	50000	REL11330	A	point-mutator	SNP	214405	214405	1885	214405	A&rarr;C	<font class=snp_type_nonsynonymous>K629Q</font>&nbsp;(<font class=mutation_in_codon>A</font>AA&rarr;<font class=mutation_in_codon>C</font>AA)&nbsp;	ldcC	ldcC	<i>ldcC</i>&nbsp;&rarr;	lysine decarboxylase 2, constitutive	lysine decarboxylase 2, constitutive	ECB_00184	snp_nonsynonymous	nonsynonymous	11330
2791	LTEE	Ara-1	50000	REL11330	A	point-mutator	SNP	214869	214869	151	214869	A&rarr;C	<font class=snp_type_nonsynonymous>N51H</font>&nbsp;(<font class=mutation_in_codon>A</font>AT&rarr;<font class=mutation_in_codon>C</font>AT)&nbsp;	yaeR	yaeR	<i>yaeR</i>&nbsp;&rarr;	predicted lyase	predicted lyase	ECB_00185	snp_nonsynonymous	nonsynonymous	11330
2792	LTEE	Ara-1	50000	REL11330	A	point-mutator	SNP	216747	216747	28	216747	A&rarr;C	<font class=snp_type_nonsynonymous>C10G</font>&nbsp;(<font class=mutation_in_codon>T</font>GT&rarr;<font class=mutation_in_codon>G</font>GT)&nbsp;	rof	rof	<i>rof</i>&nbsp;&larr;	modulator of Rho-dependent transcription termination	modulator of Rho&#8209;dependent transcription termination	ECB_00187	snp_nonsynonymous	nonsynonymous	11330
2793	LTEE	Ara-1	50000	REL11330	A	point-mutator	SNP	218211	218211	101	218211	A&rarr;C	<font class=snp_type_nonsynonymous>Q34P</font>&nbsp;(C<font class=mutation_in_codon>A</font>G&rarr;C<font class=mutation_in_codon>C</font>G)&nbsp;	cutF	cutF	<i>cutF</i>&nbsp;&rarr;	lipoprotein involved with copper homeostasis and adhesion	lipoprotein involved with copper homeostasis and adhesion	ECB_00191	snp_nonsynonymous	nonsynonymous	11330
2794	LTEE	Ara-1	50000	REL11330	A	point-mutator	SNP	222132	222132	303	222132	A&rarr;C	<font class=snp_type_synonymous>G101G</font>&nbsp;(GG<font class=mutation_in_codon>T</font>&rarr;GG<font class=mutation_in_codon>G</font>)&nbsp;	yaeB	yaeB	<i>yaeB</i>&nbsp;&larr;	hypothetical protein	hypothetical protein	ECB_00194	snp_synonymous	synonymous	11330
2795	LTEE	Ara-1	50000	REL11330	A	point-mutator	SNP	231930	231930	intergenic (+2/-161)	231930	T&rarr;G	intergenic&nbsp;(+2/&#8209;161)	aspU,dkgB	aspU/dkgB	<i>aspU</i>&nbsp;&rarr;&nbsp;/&nbsp;&rarr;&nbsp;<i>dkgB</i>	tRNA-Asp/2,5-diketo-D-gluconate reductase B	tRNA&#8209;Asp/2,5&#8209;diketo&#8209;D&#8209;gluconate reductase B	ECB_t00003/ECB_00200	snp_intergenic	intergenic	11330
2796	LTEE	Ara-1	50000	REL11330	A	point-mutator	MOB	241691	241693	coding (186-188/504 nt)	241691	IS<i>150</i>&nbsp;(&#8211;)&nbsp;+3&nbsp;bp	coding&nbsp;(186&#8209;188/504&nbsp;nt)	insB-2	insB-2	<i>insB&#8209;2</i>&nbsp;&rarr;	IS1 protein InsB	IS1 protein InsB	ECB_00211	mobile_element_insertion	not_snp	11330
2797	LTEE	Ara-1	50000	REL11330	A	point-mutator	SNP	243390	243390	578	243390	T&rarr;G	<font class=snp_type_nonsynonymous>F193C</font>&nbsp;(T<font class=mutation_in_codon>T</font>C&rarr;T<font class=mutation_in_codon>G</font>C)&nbsp;	yhhI	yhhI	<i>yhhI</i>&nbsp;&rarr;	predicted transposase	predicted transposase	ECB_00213	snp_nonsynonymous	nonsynonymous	11330
2798	LTEE	Ara-1	50000	REL11330	A	point-mutator	SNP	243788	243788	976	243788	A&rarr;C	<font class=snp_type_synonymous>R326R</font>&nbsp;(<font class=mutation_in_codon>A</font>GA&rarr;<font class=mutation_in_codon>C</font>GA)&nbsp;	yhhI	yhhI	<i>yhhI</i>&nbsp;&rarr;	predicted transposase	predicted transposase	ECB_00213	snp_synonymous	synonymous	11330
2799	LTEE	Ara-1	50000	REL11330	A	point-mutator	SNP	248095	248095	intergenic (-221/-19)	248095	T&rarr;G	intergenic&nbsp;(&#8209;221/&#8209;19)	fadE,lpcA	fadE/lpcA	<i>fadE</i>&nbsp;&larr;&nbsp;/&nbsp;&rarr;&nbsp;<i>lpcA</i>	acyl-CoA dehydrogenase/phosphoheptose isomerase	acyl&#8209;CoA dehydrogenase/phosphoheptose isomerase	ECB_00216/ECB_00217	snp_intergenic	intergenic	11330
2800	LTEE	Ara-1	50000	REL11330	A	point-mutator	SNP	250428	250428	intergenic (-52/+104)	250428	T&rarr;G	intergenic&nbsp;(&#8209;52/+104)	yafK,yafQ	yafK/yafQ	<i>yafK</i>&nbsp;&larr;&nbsp;/&nbsp;&larr;&nbsp;<i>yafQ</i>	hypothetical protein/predicted toxin of the YafQ-DinJ toxin-antitoxin system	hypothetical protein/predicted toxin of the YafQ&#8209;DinJ toxin&#8209;antitoxin system	ECB_00219/ECB_00220	snp_intergenic	intergenic	11330
2801	LTEE	Ara-1	50000	REL11330	A	point-mutator	SNP	253813	253813	pseudogene (818/1710 nt)	253813	A&rarr;C	pseudogene&nbsp;(818/1710&nbsp;nt)	fhiA	fhiA	<i>fhiA</i>&nbsp;&larr;	b0229; flagellar system protein	b0229; flagellar system protein	ECB_00224	snp_pseudogene	pseudogene	11330
2802	LTEE	Ara-1	50000	REL11330	A	point-mutator	SNP	255676	255676	216	255676	T&rarr;G	<font class=snp_type_synonymous>L72L</font>&nbsp;(CT<font class=mutation_in_codon>T</font>&rarr;CT<font class=mutation_in_codon>G</font>)&nbsp;	dinB	dinB	<i>dinB</i>&nbsp;&rarr;	DNA polymerase IV	DNA polymerase IV	ECB_00226	snp_synonymous	synonymous	11330
2803	LTEE	Ara-1	50000	REL11330	A	point-mutator	SNP	256579	256579	12	256579	T&rarr;G	<font class=snp_type_nonsynonymous>I4M</font>&nbsp;(AT<font class=mutation_in_codon>T</font>&rarr;AT<font class=mutation_in_codon>G</font>)&nbsp;	yafN	yafN	<i>yafN</i>&nbsp;&rarr;	predicted antitoxin of the YafO-YafN toxin-antitoxin system	predicted antitoxin of the YafO&#8209;YafN toxin&#8209;antitoxin system	ECB_00227	snp_nonsynonymous	nonsynonymous	11330
2804	LTEE	Ara-1	50000	REL11330	A	point-mutator	SNP	261741	261741	724	261741	A&rarr;C	<font class=snp_type_nonsynonymous>T242P</font>&nbsp;(<font class=mutation_in_codon>A</font>CC&rarr;<font class=mutation_in_codon>C</font>CC)&nbsp;	yafA	yafA	<i>yafA</i>&nbsp;&rarr;	fermentation/respiration switch protein	fermentation/respiration switch protein	ECB_00234	snp_nonsynonymous	nonsynonymous	11330
2805	LTEE	Ara-1	50000	REL11330	A	point-mutator	SNP	269228	269228	1891	269228	T&rarr;G	<font class=snp_type_nonsynonymous>T631P</font>&nbsp;(<font class=mutation_in_codon>A</font>CT&rarr;<font class=mutation_in_codon>C</font>CT)&nbsp;	yagR	yagR	<i>yagR</i>&nbsp;&larr;	predicted oxidoreductase with molybdenum-binding domain	predicted oxidoreductase with molybdenum&#8209;binding domain	ECB_00243	snp_nonsynonymous	nonsynonymous	11330
2806	LTEE	Ara-1	50000	REL11330	A	point-mutator	SNP	274584	274584	intergenic (-220/+93)	274584	T&rarr;G	intergenic&nbsp;(&#8209;220/+93)	ykgJ,yagV	ykgJ/yagV	<i>ykgJ</i>&nbsp;&larr;&nbsp;/&nbsp;&larr;&nbsp;<i>yagV</i>	predicted ferredoxin/hypothetical protein	predicted ferredoxin/hypothetical protein	ECB_00247/ECB_00248	snp_intergenic	intergenic	11330
2807	LTEE	Ara-1	50000	REL11330	A	point-mutator	SNP	274893	274893	495	274893	T&rarr;G	<font class=snp_type_synonymous>T165T</font>&nbsp;(AC<font class=mutation_in_codon>A</font>&rarr;AC<font class=mutation_in_codon>C</font>)&nbsp;	yagV	yagV	<i>yagV</i>&nbsp;&larr;	hypothetical protein	hypothetical protein	ECB_00248	snp_synonymous	synonymous	11330
2808	LTEE	Ara-1	50000	REL11330	A	point-mutator	SNP	282444	282444	153	282444	A&rarr;C	<font class=snp_type_nonsynonymous>E51D</font>&nbsp;(GA<font class=mutation_in_codon>A</font>&rarr;GA<font class=mutation_in_codon>C</font>)&nbsp;	ykgL	ykgL	<i>ykgL</i>&nbsp;&rarr;	hypothetical protein	hypothetical protein	ECB_00254	snp_nonsynonymous	nonsynonymous	11330
2809	LTEE	Ara-1	50000	REL11330	A	point-mutator	SNP	285773	285773	1237	285773	A&rarr;C	<font class=snp_type_nonsynonymous>S413R</font>&nbsp;(<font class=mutation_in_codon>A</font>GT&rarr;<font class=mutation_in_codon>C</font>GT)&nbsp;	eaeH	eaeH	<i>eaeH</i>&nbsp;&rarr;	attaching and effacing protein, pathogenesis factor	attaching and effacing protein, pathogenesis factor	ECB_00256	snp_nonsynonymous	nonsynonymous	11330
2810	LTEE	Ara-1	50000	REL11330	A	point-mutator	SNP	295469	295469	483	295469	T&rarr;G	<font class=snp_type_nonsynonymous>D161E</font>&nbsp;(GA<font class=mutation_in_codon>T</font>&rarr;GA<font class=mutation_in_codon>G</font>)&nbsp;	ykgF	ykgF	<i>ykgF</i>&nbsp;&rarr;	predicted amino acid dehydrogenase with NAD(P)-binding domain and ferridoxin-like domain	predicted amino acid dehydrogenase with NAD(P)&#8209;binding domain and ferridoxin&#8209;like domain	ECB_00263	snp_nonsynonymous	nonsynonymous	11330
2811	LTEE	Ara-1	50000	REL11330	A	point-mutator	SNP	297403	297403	611	297403	A&rarr;C	<font class=snp_type_nonsynonymous>V204G</font>&nbsp;(G<font class=mutation_in_codon>T</font>A&rarr;G<font class=mutation_in_codon>G</font>A)&nbsp;	ykgH	ykgH	<i>ykgH</i>&nbsp;&larr;	predicted inner membrane protein	predicted inner membrane protein	ECB_00266	snp_nonsynonymous	nonsynonymous	11330
2812	LTEE	Ara-1	50000	REL11330	A	point-mutator	SNP	311852	311852	879	311852	A&rarr;C	<font class=snp_type_nonsynonymous>K293N</font>&nbsp;(AA<font class=mutation_in_codon>A</font>&rarr;AA<font class=mutation_in_codon>C</font>)&nbsp;	yahG	yahG	<i>yahG</i>&nbsp;&rarr;	hypothetical protein	hypothetical protein	ECB_00277	snp_nonsynonymous	nonsynonymous	11330
2813	LTEE	Ara-1	50000	REL11330	A	point-mutator	SNP	312970	312970	157	312970	A&rarr;C	<font class=snp_type_nonsynonymous>N53H</font>&nbsp;(<font class=mutation_in_codon>A</font>AC&rarr;<font class=mutation_in_codon>C</font>AC)&nbsp;	yahI	yahI	<i>yahI</i>&nbsp;&rarr;	predicted carbamate kinase-like protein	predicted carbamate kinase&#8209;like protein	ECB_00278	snp_nonsynonymous	nonsynonymous	11330
2814	LTEE	Ara-1	50000	REL11330	A	point-mutator	SNP	313891	313891	118	313891	A&rarr;C	<font class=snp_type_nonsynonymous>N40H</font>&nbsp;(<font class=mutation_in_codon>A</font>AC&rarr;<font class=mutation_in_codon>C</font>AC)&nbsp;	yahJ	yahJ	<i>yahJ</i>&nbsp;&rarr;	deaminase	deaminase	ECB_00279	snp_nonsynonymous	nonsynonymous	11330
2815	LTEE	Ara-1	50000	REL11330	A	point-mutator	SNP	315566	315566	34	315566	A&rarr;C	<font class=snp_type_nonsynonymous>K12Q</font>&nbsp;(<font class=mutation_in_codon>A</font>AA&rarr;<font class=mutation_in_codon>C</font>AA)&nbsp;	yahK	yahK	<i>yahK</i>&nbsp;&rarr;	predicted oxidoreductase, Zn-dependent and NAD(P)-binding	predicted oxidoreductase, Zn&#8209;dependent and NAD(P)&#8209;binding	ECB_00280	snp_nonsynonymous	nonsynonymous	11330
2816	LTEE	Ara-1	50000	REL11330	A	point-mutator	SNP	325864	325864	509	325864	A&rarr;C	<font class=snp_type_nonsynonymous>K170T</font>&nbsp;(A<font class=mutation_in_codon>A</font>A&rarr;A<font class=mutation_in_codon>C</font>A)&nbsp;	prpE	prpE	<i>prpE</i>&nbsp;&rarr;	predicted propionyl-CoA synthetase with ATPase domain	predicted propionyl&#8209;CoA synthetase with ATPase domain	ECB_00289	snp_nonsynonymous	nonsynonymous	11330
2817	LTEE	Ara-1	50000	REL11330	A	point-mutator	SNP	326195	326195	840	326195	T&rarr;G	<font class=snp_type_synonymous>A280A</font>&nbsp;(GC<font class=mutation_in_codon>T</font>&rarr;GC<font class=mutation_in_codon>G</font>)&nbsp;	prpE	prpE	<i>prpE</i>&nbsp;&rarr;	predicted propionyl-CoA synthetase with ATPase domain	predicted propionyl&#8209;CoA synthetase with ATPase domain	ECB_00289	snp_synonymous	synonymous	11330
2818	LTEE	Ara-1	50000	REL11330	A	point-mutator	SNP	333953	333953	464	333953	T&rarr;G	<font class=snp_type_nonsynonymous>N155T</font>&nbsp;(A<font class=mutation_in_codon>A</font>T&rarr;A<font class=mutation_in_codon>C</font>T)&nbsp;	lacA	lacA	<i>lacA</i>&nbsp;&larr;	galactoside O-acetyltransferase	galactoside O&#8209;acetyltransferase	ECB_00296	snp_nonsynonymous	nonsynonymous	11330
2819	LTEE	Ara-1	50000	REL11330	A	point-mutator	SNP	344430	344430	651	344430	T&rarr;G	<font class=snp_type_synonymous>A217A</font>&nbsp;(GC<font class=mutation_in_codon>T</font>&rarr;GC<font class=mutation_in_codon>G</font>)&nbsp;	mhpC	mhpC	<i>mhpC</i>&nbsp;&rarr;	2-hydroxy-6-ketonona-2,4-dienedioic acid hydrolase	2&#8209;hydroxy&#8209;6&#8209;ketonona&#8209;2,4&#8209;dienedioic acid hydrolase	ECB_00303	snp_synonymous	synonymous	11330
2820	LTEE	Ara-1	50000	REL11330	A	point-mutator	SNP	360091	360091	934	360091	A&rarr;C	<font class=snp_type_nonsynonymous>T312P</font>&nbsp;(<font class=mutation_in_codon>A</font>CC&rarr;<font class=mutation_in_codon>C</font>CC)&nbsp;	yaiT	yaiT	<i>yaiT</i>&nbsp;&rarr;	conserved hypothetical protein	conserved hypothetical protein	ECB_00321	snp_nonsynonymous	nonsynonymous	11330
2821	LTEE	Ara-1	50000	REL11330	A	point-mutator	SNP	370685	370685	1293	370685	A&rarr;C	<font class=snp_type_synonymous>S431S</font>&nbsp;(TC<font class=mutation_in_codon>A</font>&rarr;TC<font class=mutation_in_codon>C</font>)&nbsp;	phoA	phoA	<i>phoA</i>&nbsp;&rarr;	bacterial alkaline phosphatase	bacterial alkaline phosphatase	ECB_00330	snp_synonymous	synonymous	11330
2822	LTEE	Ara-1	50000	REL11330	A	point-mutator	SNP	380188	380188	717	380188	A&rarr;C	<font class=snp_type_nonsynonymous>F239L</font>&nbsp;(TT<font class=mutation_in_codon>T</font>&rarr;TT<font class=mutation_in_codon>G</font>)&nbsp;	araJ	araJ	<i>araJ</i>&nbsp;&larr;	predicted transporter	predicted transporter	ECB_00344	snp_nonsynonymous	nonsynonymous	11330
2823	LTEE	Ara-1	50000	REL11330	A	point-mutator	SNP	380383	380383	522	380383	G&rarr;T	<font class=snp_type_synonymous>V174V</font>&nbsp;(GT<font class=mutation_in_codon>C</font>&rarr;GT<font class=mutation_in_codon>A</font>)&nbsp;	araJ	araJ	<i>araJ</i>&nbsp;&larr;	predicted transporter	predicted transporter	ECB_00344	snp_synonymous	synonymous	11330
2824	LTEE	Ara-1	50000	REL11330	A	point-mutator	SNP	383324	383324	853	383324	G&rarr;T	<font class=snp_type_nonsynonymous>L285M</font>&nbsp;(<font class=mutation_in_codon>C</font>TG&rarr;<font class=mutation_in_codon>A</font>TG)&nbsp;	sbcC	sbcC	<i>sbcC</i>&nbsp;&larr;	exonuclease, dsDNA, ATP-dependent	exonuclease, dsDNA, ATP&#8209;dependent	ECB_00345	snp_nonsynonymous	nonsynonymous	11330
2825	LTEE	Ara-1	50000	REL11330	A	point-mutator	SNP	388908	388908	895	388908	A&rarr;C	<font class=snp_type_nonsynonymous>T299P</font>&nbsp;(<font class=mutation_in_codon>A</font>CC&rarr;<font class=mutation_in_codon>C</font>CC)&nbsp;	brnQ	brnQ	<i>brnQ</i>&nbsp;&rarr;	predicted branched chain amino acid transporter (LIV-II)	predicted branched chain amino acid transporter (LIV&#8209;II)	ECB_00349	snp_nonsynonymous	nonsynonymous	11330
2826	LTEE	Ara-1	50000	REL11330	A	point-mutator	SNP	389819	389819	411	389819	A&rarr;C	<font class=snp_type_synonymous>V137V</font>&nbsp;(GT<font class=mutation_in_codon>A</font>&rarr;GT<font class=mutation_in_codon>C</font>)&nbsp;	proY	proY	<i>proY</i>&nbsp;&rarr;	predicted cryptic proline transporter	predicted cryptic proline transporter	ECB_00350	snp_synonymous	synonymous	11330
2827	LTEE	Ara-1	50000	REL11330	A	point-mutator	SNP	398007	398007	80	398007	T&rarr;G	<font class=snp_type_nonsynonymous>F27C</font>&nbsp;(T<font class=mutation_in_codon>T</font>C&rarr;T<font class=mutation_in_codon>G</font>C)&nbsp;	secF	secF	<i>secF</i>&nbsp;&rarr;	protein export protein SecF	protein export protein SecF	ECB_00357	snp_nonsynonymous	nonsynonymous	11330
2828	LTEE	Ara-1	50000	REL11330	A	point-mutator	SNP	403444	403444	376	403444	A&rarr;C	<font class=snp_type_nonsynonymous>I126L</font>&nbsp;(<font class=mutation_in_codon>A</font>TC&rarr;<font class=mutation_in_codon>C</font>TC)&nbsp;	ribH	ribH	<i>ribH</i>&nbsp;&rarr;	riboflavin synthase subunit beta	riboflavin synthase subunit beta	ECB_00363	snp_nonsynonymous	nonsynonymous	11330
2829	LTEE	Ara-1	50000	REL11330	A	point-mutator	SNP	411119	411119	1149	411119	T&rarr;G	<font class=snp_type_nonsynonymous>D383E</font>&nbsp;(GA<font class=mutation_in_codon>T</font>&rarr;GA<font class=mutation_in_codon>G</font>)&nbsp;	thiI	thiI	<i>thiI</i>&nbsp;&rarr;	thiamine biosynthesis protein ThiI	thiamine biosynthesis protein ThiI	ECB_00371	snp_nonsynonymous	nonsynonymous	11330
2830	LTEE	Ara-1	50000	REL11330	A	point-mutator	SNP	418409	418409	intergenic (-1/+11)	418409	A&rarr;C	intergenic&nbsp;(&#8209;1/+11)	cyoE,cyoD	cyoE/cyoD	<i>cyoE</i>&nbsp;&larr;&nbsp;/&nbsp;&larr;&nbsp;<i>cyoD</i>	protoheme IX farnesyltransferase/cytochrome o ubiquinol oxidase subunit IV	protoheme IX farnesyltransferase/cytochrome o ubiquinol oxidase subunit IV	ECB_00379/ECB_00380	snp_intergenic	intergenic	11330
2831	LTEE	Ara-1	50000	REL11330	A	point-mutator	SNP	428833	428833	703	428833	T&rarr;G	<font class=snp_type_nonsynonymous>F235V</font>&nbsp;(<font class=mutation_in_codon>T</font>TC&rarr;<font class=mutation_in_codon>G</font>TC)&nbsp;	clpX	clpX	<i>clpX</i>&nbsp;&rarr;	ATP-dependent protease ATP-binding subunit	ATP&#8209;dependent protease ATP&#8209;binding subunit	ECB_00389	snp_nonsynonymous	nonsynonymous	11330
2832	LTEE	Ara-1	50000	REL11330	A	point-mutator	SNP	430835	430835	intergenic (-48/-108)	430835	C&rarr;T	intergenic&nbsp;(&#8209;48/&#8209;108)	insL-2,lon	insL-2/lon	<i>insL&#8209;2</i>&nbsp;&larr;&nbsp;/&nbsp;&rarr;&nbsp;<i>lon</i>	putative transposase insL for insertion sequence IS186/DNA-binding ATP-dependent protease La	putative transposase insL for insertion sequence IS186/DNA&#8209;binding ATP&#8209;dependent protease La	ECB_00390/ECB_00391	snp_intergenic	intergenic	11330
2833	LTEE	Ara-1	50000	REL11330	A	point-mutator	SNP	434661	434661	692	434661	T&rarr;G	<font class=snp_type_nonsynonymous>F231C</font>&nbsp;(T<font class=mutation_in_codon>T</font>C&rarr;T<font class=mutation_in_codon>G</font>C)&nbsp;	ppiD	ppiD	<i>ppiD</i>&nbsp;&rarr;	peptidyl-prolyl cis-trans isomerase (rotamase D)	peptidyl&#8209;prolyl cis&#8209;trans isomerase (rotamase D)	ECB_00393	snp_nonsynonymous	nonsynonymous	11330
2834	LTEE	Ara-1	50000	REL11330	A	point-mutator	SNP	436416	436416	intergenic (+53/-53)	436416	T&rarr;G	intergenic&nbsp;(+53/&#8209;53)	ybaV,ybaW	ybaV/ybaW	<i>ybaV</i>&nbsp;&rarr;&nbsp;/&nbsp;&rarr;&nbsp;<i>ybaW</i>	hypothetical protein/hypothetical protein	hypothetical protein/hypothetical protein	ECB_00394/ECB_00395	snp_intergenic	intergenic	11330
2835	LTEE	Ara-1	50000	REL11330	A	point-mutator	SNP	439367	439367	13	439367	T&rarr;G	<font class=snp_type_nonsynonymous>N5H</font>&nbsp;(<font class=mutation_in_codon>A</font>AC&rarr;<font class=mutation_in_codon>C</font>AC)&nbsp;	ybaE	ybaE	<i>ybaE</i>&nbsp;&larr;	predicted transporter subunit: periplasmic-binding component of ABC superfamily	predicted transporter subunit: periplasmic&#8209;binding component of ABC superfamily	ECB_00397	snp_nonsynonymous	nonsynonymous	11330
2836	LTEE	Ara-1	50000	REL11330	A	point-mutator	SNP	440160	440160	682	440160	A&rarr;C	<font class=snp_type_nonsynonymous>I228L</font>&nbsp;(<font class=mutation_in_codon>A</font>TT&rarr;<font class=mutation_in_codon>C</font>TT)&nbsp;	cof	cof	<i>cof</i>&nbsp;&rarr;	thiamin pyrimidine pyrophosphate hydrolase	thiamin pyrimidine pyrophosphate hydrolase	ECB_00398	snp_nonsynonymous	nonsynonymous	11330
2837	LTEE	Ara-1	50000	REL11330	A	point-mutator	SNP	440276	440276	798	440276	T&rarr;G	<font class=snp_type_nonsynonymous>H266Q</font>&nbsp;(CA<font class=mutation_in_codon>T</font>&rarr;CA<font class=mutation_in_codon>G</font>)&nbsp;	cof	cof	<i>cof</i>&nbsp;&rarr;	thiamin pyrimidine pyrophosphate hydrolase	thiamin pyrimidine pyrophosphate hydrolase	ECB_00398	snp_nonsynonymous	nonsynonymous	11330
2838	LTEE	Ara-1	50000	REL11330	A	point-mutator	SNP	451643	451643	343	451643	T&rarr;G	<font class=snp_type_nonsynonymous>I115L</font>&nbsp;(<font class=mutation_in_codon>A</font>TC&rarr;<font class=mutation_in_codon>C</font>TC)&nbsp;	maa	maa	<i>maa</i>&nbsp;&larr;	maltose O-acetyltransferase	maltose O&#8209;acetyltransferase	ECB_00410	snp_nonsynonymous	nonsynonymous	11330
2839	LTEE	Ara-1	50000	REL11330	A	point-mutator	SNP	451789	451789	197	451789	A&rarr;G	<font class=snp_type_nonsynonymous>F66S</font>&nbsp;(T<font class=mutation_in_codon>T</font>T&rarr;T<font class=mutation_in_codon>C</font>T)&nbsp;	maa	maa	<i>maa</i>&nbsp;&larr;	maltose O-acetyltransferase	maltose O&#8209;acetyltransferase	ECB_00410	snp_nonsynonymous	nonsynonymous	11330
2840	LTEE	Ara-1	50000	REL11330	A	point-mutator	SNP	454759	454759	1712	454759	A&rarr;C	<font class=snp_type_nonsynonymous>V571G</font>&nbsp;(G<font class=mutation_in_codon>T</font>G&rarr;G<font class=mutation_in_codon>G</font>G)&nbsp;	acrB	acrB	<i>acrB</i>&nbsp;&larr;	multidrug efflux system protein	multidrug efflux system protein	ECB_00413	snp_nonsynonymous	nonsynonymous	11330
2841	LTEE	Ara-1	50000	REL11330	A	point-mutator	SNP	459169	459169	567	459169	T&rarr;G	<font class=snp_type_synonymous>T189T</font>&nbsp;(AC<font class=mutation_in_codon>T</font>&rarr;AC<font class=mutation_in_codon>G</font>)&nbsp;	kefA	kefA	<i>kefA</i>&nbsp;&rarr;	fused conserved protein	fused conserved protein	ECB_00416	snp_synonymous	synonymous	11330
2842	LTEE	Ara-1	50000	REL11330	A	point-mutator	SNP	461180	461180	2578	461180	A&rarr;C	<font class=snp_type_nonsynonymous>I860L</font>&nbsp;(<font class=mutation_in_codon>A</font>TT&rarr;<font class=mutation_in_codon>C</font>TT)&nbsp;	kefA	kefA	<i>kefA</i>&nbsp;&rarr;	fused conserved protein	fused conserved protein	ECB_00416	snp_nonsynonymous	nonsynonymous	11330
2843	LTEE	Ara-1	50000	REL11330	A	point-mutator	SNP	466780	466780	309	466780	T&rarr;G	<font class=snp_type_synonymous>G103G</font>&nbsp;(GG<font class=mutation_in_codon>T</font>&rarr;GG<font class=mutation_in_codon>G</font>)&nbsp;	recR	recR	<i>recR</i>&nbsp;&rarr;	recombination protein RecR	recombination protein RecR	ECB_00423	snp_synonymous	synonymous	11330
2844	LTEE	Ara-1	50000	REL11330	A	point-mutator	SNP	466947	466947	476	466947	A&rarr;C	<font class=snp_type_nonsynonymous>E159A</font>&nbsp;(G<font class=mutation_in_codon>A</font>G&rarr;G<font class=mutation_in_codon>C</font>G)&nbsp;	recR	recR	<i>recR</i>&nbsp;&rarr;	recombination protein RecR	recombination protein RecR	ECB_00423	snp_nonsynonymous	nonsynonymous	11330
2845	LTEE	Ara-1	50000	REL11330	A	point-mutator	SNP	467120	467120	intergenic (+43/-67)	467120	T&rarr;G	intergenic&nbsp;(+43/&#8209;67)	recR,htpG	recR/htpG	<i>recR</i>&nbsp;&rarr;&nbsp;/&nbsp;&rarr;&nbsp;<i>htpG</i>	recombination protein RecR/heat shock protein 90	recombination protein RecR/heat shock protein 90	ECB_00423/ECB_00424	snp_intergenic	intergenic	11330
2846	LTEE	Ara-1	50000	REL11330	A	point-mutator	SNP	473602	473602	intergenic (+106/+27)	473602	T&rarr;G	intergenic&nbsp;(+106/+27)	gsk,ybaL	gsk/ybaL	<i>gsk</i>&nbsp;&rarr;&nbsp;/&nbsp;&larr;&nbsp;<i>ybaL</i>	inosine/guanosine kinase/predicted transporter with NAD(P)-binding Rossmann-fold domain	inosine/guanosine kinase/predicted transporter with NAD(P)&#8209;binding Rossmann&#8209;fold domain	ECB_00428/ECB_00429	snp_intergenic	intergenic	11330
2847	LTEE	Ara-1	50000	REL11330	A	point-mutator	SNP	474977	474977	329	474977	A&rarr;C	<font class=snp_type_nonsynonymous>L110R</font>&nbsp;(C<font class=mutation_in_codon>T</font>G&rarr;C<font class=mutation_in_codon>G</font>G)&nbsp;	ybaL	ybaL	<i>ybaL</i>&nbsp;&larr;	predicted transporter with NAD(P)-binding Rossmann-fold domain	predicted transporter with NAD(P)&#8209;binding Rossmann&#8209;fold domain	ECB_00429	snp_nonsynonymous	nonsynonymous	11330
2848	LTEE	Ara-1	50000	REL11330	A	point-mutator	INS	475292	475292	coding (14/1677 nt)	475292	+G	coding&nbsp;(14/1677&nbsp;nt)	ybaL	ybaL	<i>ybaL</i>&nbsp;&larr;	predicted transporter with NAD(P)-binding Rossmann-fold domain	predicted transporter with NAD(P)&#8209;binding Rossmann&#8209;fold domain	ECB_00429	small_indel	not_snp	11330
2849	LTEE	Ara-1	50000	REL11330	A	point-mutator	SNP	477305	477305	325	477305	T&rarr;G	<font class=snp_type_nonsynonymous>Y109D</font>&nbsp;(<font class=mutation_in_codon>T</font>AT&rarr;<font class=mutation_in_codon>G</font>AT)&nbsp;	ushA	ushA	<i>ushA</i>&nbsp;&rarr;	UDP-sugar hydrolase	UDP&#8209;sugar hydrolase	ECB_00431	snp_nonsynonymous	nonsynonymous	11330
2850	LTEE	Ara-1	50000	REL11330	A	point-mutator	SNP	487930	487930	12	487930	A&rarr;C	<font class=snp_type_nonsynonymous>F4L</font>&nbsp;(TT<font class=mutation_in_codon>T</font>&rarr;TT<font class=mutation_in_codon>G</font>)&nbsp;	ybbK	ybbK	<i>ybbK</i>&nbsp;&larr;	predicted protease, membrane anchored	predicted protease, membrane anchored	ECB_00440	snp_nonsynonymous	nonsynonymous	11330
2851	LTEE	Ara-1	50000	REL11330	A	point-mutator	SNP	494082	494082	1499	494082	A&rarr;C	<font class=snp_type_nonsynonymous>E500A</font>&nbsp;(G<font class=mutation_in_codon>A</font>A&rarr;G<font class=mutation_in_codon>C</font>A)&nbsp;	ybbP	ybbP	<i>ybbP</i>&nbsp;&rarr;	predicted inner membrane protein	predicted inner membrane protein	ECB_00447	snp_nonsynonymous	nonsynonymous	11330
2852	LTEE	Ara-1	50000	REL11330	A	point-mutator	SNP	494682	494682	2099	494682	T&rarr;G	<font class=snp_type_nonsynonymous>V700G</font>&nbsp;(G<font class=mutation_in_codon>T</font>G&rarr;G<font class=mutation_in_codon>G</font>G)&nbsp;	ybbP	ybbP	<i>ybbP</i>&nbsp;&rarr;	predicted inner membrane protein	predicted inner membrane protein	ECB_00447	snp_nonsynonymous	nonsynonymous	11330
2853	LTEE	Ara-1	50000	REL11330	A	point-mutator	SNP	507691	507691	1610	507691	A&rarr;C	<font class=snp_type_nonsynonymous>Q537P</font>&nbsp;(C<font class=mutation_in_codon>A</font>G&rarr;C<font class=mutation_in_codon>C</font>G)&nbsp;	gcl	gcl	<i>gcl</i>&nbsp;&rarr;	glyoxylate carboligase	glyoxylate carboligase	ECB_00457	snp_nonsynonymous	nonsynonymous	11330
2854	LTEE	Ara-1	50000	REL11330	A	point-mutator	SNP	508599	508599	724	508599	A&rarr;C	<font class=snp_type_nonsynonymous>K242Q</font>&nbsp;(<font class=mutation_in_codon>A</font>AA&rarr;<font class=mutation_in_codon>C</font>AA)&nbsp;	hyi	hyi	<i>hyi</i>&nbsp;&rarr;	hydroxypyruvate isomerase	hydroxypyruvate isomerase	ECB_00458	snp_nonsynonymous	nonsynonymous	11330
2855	LTEE	Ara-1	50000	REL11330	A	point-mutator	SNP	522943	522943	339	522943	T&rarr;G	<font class=snp_type_nonsynonymous>D113E</font>&nbsp;(GA<font class=mutation_in_codon>T</font>&rarr;GA<font class=mutation_in_codon>G</font>)&nbsp;	arcC	arcC	<i>arcC</i>&nbsp;&rarr;	predicted carbamate kinase	predicted carbamate kinase	ECB_00471	snp_nonsynonymous	nonsynonymous	11330
2856	LTEE	Ara-1	50000	REL11330	A	point-mutator	SNP	527702	527702	984	527702	A&rarr;C	<font class=snp_type_nonsynonymous>K328N</font>&nbsp;(AA<font class=mutation_in_codon>A</font>&rarr;AA<font class=mutation_in_codon>C</font>)&nbsp;	cysS	cysS	<i>cysS</i>&nbsp;&rarr;	cysteinyl-tRNA synthetase	cysteinyl&#8209;tRNA synthetase	ECB_00476	snp_nonsynonymous	nonsynonymous	11330
2857	LTEE	Ara-1	50000	REL11330	A	point-mutator	SNP	532283	532283	479	532283	T&rarr;G	<font class=snp_type_nonsynonymous>L160W</font>&nbsp;(T<font class=mutation_in_codon>T</font>G&rarr;T<font class=mutation_in_codon>G</font>G)&nbsp;	sfmD	sfmD	<i>sfmD</i>&nbsp;&rarr;	predicted outer membrane export usher protein	predicted outer membrane export usher protein	ECB_00482	snp_nonsynonymous	nonsynonymous	11330
2858	LTEE	Ara-1	50000	REL11330	A	point-mutator	SNP	535238	535238	783	535238	T&rarr;G	<font class=snp_type_nonsynonymous>D261E</font>&nbsp;(GA<font class=mutation_in_codon>T</font>&rarr;GA<font class=mutation_in_codon>G</font>)&nbsp;	sfmH	sfmH	<i>sfmH</i>&nbsp;&rarr;	predicted fimbrial-like adhesin protein	predicted fimbrial&#8209;like adhesin protein	ECB_00483	snp_nonsynonymous	nonsynonymous	11330
2859	LTEE	Ara-1	50000	REL11330	A	point-mutator	SNP	540221	540221	17	540221	A&rarr;C	<font class=snp_type_nonsynonymous>Y6S</font>&nbsp;(T<font class=mutation_in_codon>A</font>T&rarr;T<font class=mutation_in_codon>C</font>T)&nbsp;	emrE	emrE	<i>emrE</i>&nbsp;&rarr;	multidrug efflux protein	multidrug efflux protein	ECB_00493	snp_nonsynonymous	nonsynonymous	11330
2860	LTEE	Ara-1	50000	REL11330	A	point-mutator	SNP	541954	541954	1163	541954	T&rarr;G	<font class=snp_type_nonsynonymous>I388S</font>&nbsp;(A<font class=mutation_in_codon>T</font>T&rarr;A<font class=mutation_in_codon>G</font>T)&nbsp;	ybcK	ybcK	<i>ybcK</i>&nbsp;&rarr;	predicted recombinase	predicted recombinase	ECB_00494	snp_nonsynonymous	nonsynonymous	11330
2861	LTEE	Ara-1	50000	REL11330	A	point-mutator	SNP	543366	543366	23	543366	A&rarr;C	<font class=snp_type_nonsynonymous>N8T</font>&nbsp;(A<font class=mutation_in_codon>A</font>C&rarr;A<font class=mutation_in_codon>C</font>C)&nbsp;	ybcM	ybcM	<i>ybcM</i>&nbsp;&rarr;	predicted DNA-binding transcriptional regulator	predicted DNA&#8209;binding transcriptional regulator	ECB_00496	snp_nonsynonymous	nonsynonymous	11330
2862	LTEE	Ara-1	50000	REL11330	A	point-mutator	SNP	543686	543686	343	543686	T&rarr;G	<font class=snp_type_nonsynonymous>L115V</font>&nbsp;(<font class=mutation_in_codon>T</font>TA&rarr;<font class=mutation_in_codon>G</font>TA)&nbsp;	ybcM	ybcM	<i>ybcM</i>&nbsp;&rarr;	predicted DNA-binding transcriptional regulator	predicted DNA&#8209;binding transcriptional regulator	ECB_00496	snp_nonsynonymous	nonsynonymous	11330
2863	LTEE	Ara-1	50000	REL11330	A	point-mutator	DEL	547700	555923	NA	547700	&Delta;8,224&nbsp;bp	IS<i>1</i>&#8209;mediated	[nmpC],ybcR,ybcS,ybcT,ybcU,ECB_00510,nohB,ECB_00512,[ECB_00513]	[nmpC]–[ECB_00513]	<i>[nmpC]</i>&#8211;<i>[ECB_00513]</i>	[nmpC], ybcR, ybcS, ybcT, ybcU, ECB_00510, nohB, ECB_00512, [ECB_00513]	<i>[nmpC], ybcR, ybcS, ybcT, ybcU, ECB_00510, nohB, ECB_00512, [ECB_00513]</i>	[ECB_00503]–[ECB_00513]	large_deletion	not_snp	11330
2864	LTEE	Ara-1	50000	REL11330	A	point-mutator	SNP	558583	558583	intergenic (-136/-450)	558583	T&rarr;G	intergenic&nbsp;(&#8209;136/&#8209;450)	ECB_00517,appY	ECB_00517/appY	<i>ECB_00517</i>&nbsp;&larr;&nbsp;/&nbsp;&rarr;&nbsp;<i>appY</i>	conserved hypothetical protein/DNA-binding transcriptional activator	conserved hypothetical protein/DNA&#8209;binding transcriptional activator	ECB_00517/ECB_00518	snp_intergenic	intergenic	11330
2865	LTEE	Ara-1	50000	REL11330	A	point-mutator	SNP	559495	559495	463	559495	T&rarr;G	<font class=snp_type_nonsynonymous>L155V</font>&nbsp;(<font class=mutation_in_codon>T</font>TA&rarr;<font class=mutation_in_codon>G</font>TA)&nbsp;	appY	appY	<i>appY</i>&nbsp;&rarr;	DNA-binding transcriptional activator	DNA&#8209;binding transcriptional activator	ECB_00518	snp_nonsynonymous	nonsynonymous	11330
2866	LTEE	Ara-1	50000	REL11330	A	point-mutator	SNP	565482	565482	824	565482	T&rarr;G	<font class=snp_type_nonsynonymous>E275A</font>&nbsp;(G<font class=mutation_in_codon>A</font>A&rarr;G<font class=mutation_in_codon>C</font>A)&nbsp;	nfrA	nfrA	<i>nfrA</i>&nbsp;&larr;	bacteriophage N4 receptor, outer membrane subunit	bacteriophage N4 receptor, outer membrane subunit	ECB_00522	snp_nonsynonymous	nonsynonymous	11330
2867	LTEE	Ara-1	50000	REL11330	A	point-mutator	INS	576331	576331	coding (16/684 nt)	576331	(TTCGAC)<sub>1&rarr;2</sub>	coding&nbsp;(16/684&nbsp;nt)	cusR	cusR	<i>cusR</i>&nbsp;&larr;	DNA-binding response regulator in two-component regulatory system with CusS	DNA&#8209;binding response regulator in two&#8209;component regulatory system with CusS	ECB_00532	small_indel	not_snp	11330
2868	LTEE	Ara-1	50000	REL11330	A	point-mutator	SNP	579095	579095	714	579095	T&rarr;G	<font class=snp_type_nonsynonymous>I238M</font>&nbsp;(AT<font class=mutation_in_codon>T</font>&rarr;AT<font class=mutation_in_codon>G</font>)&nbsp;	cusB	cusB	<i>cusB</i>&nbsp;&rarr;	copper/silver efflux system, membrane fusion protein	copper/silver efflux system, membrane fusion protein	ECB_00535	snp_nonsynonymous	nonsynonymous	11330
2869	LTEE	Ara-1	50000	REL11330	A	point-mutator	SNP	598442	598442	1578	598442	T&rarr;G	<font class=snp_type_synonymous>V526V</font>&nbsp;(GT<font class=mutation_in_codon>T</font>&rarr;GT<font class=mutation_in_codon>G</font>)&nbsp;	entF	entF	<i>entF</i>&nbsp;&rarr;	enterobactin synthase multienzyme complex component, ATP-dependent	enterobactin synthase multienzyme complex component, ATP&#8209;dependent	ECB_00553	snp_synonymous	synonymous	11330
2870	LTEE	Ara-1	50000	REL11330	A	point-mutator	SNP	606276	606276	943	606276	T&rarr;G	<font class=snp_type_nonsynonymous>K315Q</font>&nbsp;(<font class=mutation_in_codon>A</font>AG&rarr;<font class=mutation_in_codon>C</font>AG)&nbsp;	fepB	fepB	<i>fepB</i>&nbsp;&larr;	iron-enterobactin transporter subunit	iron&#8209;enterobactin transporter subunit	ECB_00559	snp_nonsynonymous	nonsynonymous	11330
2871	LTEE	Ara-1	50000	REL11330	A	point-mutator	SNP	608267	608267	675	608267	T&rarr;G	<font class=snp_type_nonsynonymous>D225E</font>&nbsp;(GA<font class=mutation_in_codon>T</font>&rarr;GA<font class=mutation_in_codon>G</font>)&nbsp;	entC	entC	<i>entC</i>&nbsp;&rarr;	isochorismate synthase	isochorismate synthase	ECB_00560	snp_nonsynonymous	nonsynonymous	11330
2872	LTEE	Ara-1	50000	REL11330	A	point-mutator	SNP	613568	613568	pseudogene (967/1023 nt)	613568	T&rarr;G	pseudogene&nbsp;(967/1023&nbsp;nt)	cstA	cstA	<i>cstA</i>&nbsp;&rarr;	carbon starvation protein; b0598_1	carbon starvation protein; b0598_1	ECB_00565	snp_pseudogene	pseudogene	11330
2873	LTEE	Ara-1	50000	REL11330	A	point-mutator	SNP	618019	618019	55	618019	T&rarr;G	<font class=snp_type_nonsynonymous>S19R</font>&nbsp;(<font class=mutation_in_codon>A</font>GC&rarr;<font class=mutation_in_codon>C</font>GC)&nbsp;	ybdM	ybdM	<i>ybdM</i>&nbsp;&larr;	hypothetical protein	hypothetical protein	ECB_00569	snp_nonsynonymous	nonsynonymous	11330
2874	LTEE	Ara-1	50000	REL11330	A	point-mutator	SNP	622201	622201	398	622201	C&rarr;A	<font class=snp_type_nonsynonymous>P133Q</font>&nbsp;(C<font class=mutation_in_codon>C</font>G&rarr;C<font class=mutation_in_codon>A</font>G)&nbsp;	ahpF	ahpF	<i>ahpF</i>&nbsp;&rarr;	alkyl hydroperoxide reductase, F52a subunit, FAD/NAD(P)-binding	alkyl hydroperoxide reductase, F52a subunit, FAD/NAD(P)&#8209;binding	ECB_00575	snp_nonsynonymous	nonsynonymous	11330
2875	LTEE	Ara-1	50000	REL11330	A	point-mutator	SNP	648139	648139	759	648139	A&rarr;C	<font class=snp_type_synonymous>L253L</font>&nbsp;(CT<font class=mutation_in_codon>T</font>&rarr;CT<font class=mutation_in_codon>G</font>)&nbsp;	mrdB	mrdB	<i>mrdB</i>&nbsp;&larr;	cell wall shape-determining protein	cell wall shape&#8209;determining protein	ECB_00603	snp_synonymous	synonymous	11330
2876	LTEE	Ara-1	50000	REL11330	A	point-mutator	SNP	649391	649391	1411	649391	T&rarr;A	<font class=snp_type_nonsynonymous>I471F</font>&nbsp;(<font class=mutation_in_codon>A</font>TC&rarr;<font class=mutation_in_codon>T</font>TC)&nbsp;	mrdA	mrdA	<i>mrdA</i>&nbsp;&larr;	transpeptidase involved in peptidoglycan synthesis (penicillin-binding protein 2)	transpeptidase involved in peptidoglycan synthesis (penicillin&#8209;binding protein 2)	ECB_00604	snp_nonsynonymous	nonsynonymous	11330
2877	LTEE	Ara-1	50000	REL11330	A	point-mutator	SNP	651095	651095	205	651095	T&rarr;G	<font class=snp_type_nonsynonymous>I69L</font>&nbsp;(<font class=mutation_in_codon>A</font>TT&rarr;<font class=mutation_in_codon>C</font>TT)&nbsp;	ybeA	ybeA	<i>ybeA</i>&nbsp;&larr;	hypothetical protein	hypothetical protein	ECB_00605	snp_nonsynonymous	nonsynonymous	11330
2878	LTEE	Ara-1	50000	REL11330	A	point-mutator	SNP	653483	653483	707	653483	A&rarr;C	<font class=snp_type_nonsynonymous>L236R</font>&nbsp;(C<font class=mutation_in_codon>T</font>G&rarr;C<font class=mutation_in_codon>G</font>G)&nbsp;	holA	holA	<i>holA</i>&nbsp;&larr;	DNA polymerase III subunit delta	DNA polymerase III subunit delta	ECB_00609	snp_nonsynonymous	nonsynonymous	11330
2879	LTEE	Ara-1	50000	REL11330	A	point-mutator	SNP	659814	659814	520	659814	T&rarr;G	<font class=snp_type_nonsynonymous>S174A</font>&nbsp;(<font class=mutation_in_codon>T</font>CT&rarr;<font class=mutation_in_codon>G</font>CT)&nbsp;	ybeR	ybeR	<i>ybeR</i>&nbsp;&rarr;	hypothetical protein	hypothetical protein	ECB_00614	snp_nonsynonymous	nonsynonymous	11330
2880	LTEE	Ara-1	50000	REL11330	A	point-mutator	SNP	662133	662133	1047	662133	T&rarr;G	<font class=snp_type_nonsynonymous>E349D</font>&nbsp;(GA<font class=mutation_in_codon>A</font>&rarr;GA<font class=mutation_in_codon>C</font>)&nbsp;	hscC	hscC	<i>hscC</i>&nbsp;&larr;	Hsp70 family chaperone Hsc62, binds to RpoD and inhibits transcription	Hsp70 family chaperone Hsc62, binds to RpoD and inhibits transcription	ECB_00616	snp_nonsynonymous	nonsynonymous	11330
2881	LTEE	Ara-1	50000	REL11330	A	point-mutator	SNP	666636	666636	526	666636	A&rarr;C	<font class=snp_type_nonsynonymous>S176A</font>&nbsp;(<font class=mutation_in_codon>T</font>CT&rarr;<font class=mutation_in_codon>G</font>CT)&nbsp;	gltK	gltK	<i>gltK</i>&nbsp;&larr;	glutamate and aspartate transporter subunit	glutamate and aspartate transporter subunit	ECB_00621	snp_nonsynonymous	nonsynonymous	11330
2882	LTEE	Ara-1	50000	REL11330	A	point-mutator	SNP	668787	668787	193	668787	A&rarr;C	<font class=snp_type_nonsynonymous>Y65D</font>&nbsp;(<font class=mutation_in_codon>T</font>AC&rarr;<font class=mutation_in_codon>G</font>AC)&nbsp;	gltI	gltI	<i>gltI</i>&nbsp;&larr;	glutamate and aspartate transporter subunit	glutamate and aspartate transporter subunit	ECB_00623	snp_nonsynonymous	nonsynonymous	11330
2883	LTEE	Ara-1	50000	REL11330	A	point-mutator	SNP	681317	681317	intergenic (-45/+352)	681317	T&rarr;G	intergenic&nbsp;(&#8209;45/+352)	asnB,nagD	asnB/nagD	<i>asnB</i>&nbsp;&larr;&nbsp;/&nbsp;&larr;&nbsp;<i>nagD</i>	asparagine synthetase B/UMP phosphatase	asparagine synthetase B/UMP phosphatase	ECB_00631/ECB_00632	snp_intergenic	intergenic	11330
2884	LTEE	Ara-1	50000	REL11330	A	point-mutator	SNP	683496	683496	194	683496	A&rarr;C	<font class=snp_type_nonsynonymous>V65G</font>&nbsp;(G<font class=mutation_in_codon>T</font>T&rarr;G<font class=mutation_in_codon>G</font>T)&nbsp;	nagC	nagC	<i>nagC</i>&nbsp;&larr;	DNA-binding transcriptional dual regulator, repressor of N-acetylglucosamine	DNA&#8209;binding transcriptional dual regulator, repressor of N&#8209;acetylglucosamine	ECB_00633	snp_nonsynonymous	nonsynonymous	11330
2885	LTEE	Ara-1	50000	REL11330	A	point-mutator	SNP	683582	683582	108	683582	A&rarr;C	<font class=snp_type_nonsynonymous>I36M</font>&nbsp;(AT<font class=mutation_in_codon>T</font>&rarr;AT<font class=mutation_in_codon>G</font>)&nbsp;	nagC	nagC	<i>nagC</i>&nbsp;&larr;	DNA-binding transcriptional dual regulator, repressor of N-acetylglucosamine	DNA&#8209;binding transcriptional dual regulator, repressor of N&#8209;acetylglucosamine	ECB_00633	snp_nonsynonymous	nonsynonymous	11330
2886	LTEE	Ara-1	50000	REL11330	A	point-mutator	SNP	685932	685932	intergenic (-226/-107)	685932	A&rarr;C	intergenic&nbsp;(&#8209;226/&#8209;107)	nagB,nagE	nagB/nagE	<i>nagB</i>&nbsp;&larr;&nbsp;/&nbsp;&rarr;&nbsp;<i>nagE</i>	glucosamine-6-phosphate deaminase/fused N-acetyl glucosamine specific PTS enzyme: IIC, IIB , and IIA components	glucosamine&#8209;6&#8209;phosphate deaminase/fused N&#8209;acetyl glucosamine specific PTS enzyme: IIC, IIB , and IIA components	ECB_00635/ECB_00636	snp_intergenic	intergenic	11330
2887	LTEE	Ara-1	50000	REL11330	A	point-mutator	SNP	697270	697270	1618	697270	A&rarr;C	<font class=snp_type_nonsynonymous>S540R</font>&nbsp;(<font class=mutation_in_codon>A</font>GC&rarr;<font class=mutation_in_codon>C</font>GC)&nbsp;	pgm	pgm	<i>pgm</i>&nbsp;&rarr;	phosphoglucomutase	phosphoglucomutase	ECB_00645	snp_nonsynonymous	nonsynonymous	11330
2888	LTEE	Ara-1	50000	REL11330	A	point-mutator	SNP	699675	699675	686	699675	C&rarr;A	<font class=snp_type_nonsynonymous>G229V</font>&nbsp;(G<font class=mutation_in_codon>G</font>C&rarr;G<font class=mutation_in_codon>T</font>C)&nbsp;	potE	potE	<i>potE</i>&nbsp;&larr;	putrescine/proton symporter: putrescine/ornithine antiporter	putrescine/proton symporter: putrescine/ornithine antiporter	ECB_00648	snp_nonsynonymous	nonsynonymous	11330
2889	LTEE	Ara-1	50000	REL11330	A	point-mutator	SNP	703655	703655	174	703655	A&rarr;C	<font class=snp_type_synonymous>G58G</font>&nbsp;(GG<font class=mutation_in_codon>T</font>&rarr;GG<font class=mutation_in_codon>G</font>)&nbsp;	kdpE	kdpE	<i>kdpE</i>&nbsp;&larr;	DNA-binding response regulator in two-component regulatory system with KdpD	DNA&#8209;binding response regulator in two&#8209;component regulatory system with KdpD	ECB_00651	snp_synonymous	synonymous	11330
2890	LTEE	Ara-1	50000	REL11330	A	point-mutator	SNP	704406	704406	2107	704406	G&rarr;T	<font class=snp_type_nonsynonymous>R703S</font>&nbsp;(<font class=mutation_in_codon>C</font>GC&rarr;<font class=mutation_in_codon>A</font>GC)&nbsp;	kdpD	kdpD	<i>kdpD</i>&nbsp;&larr;	fused sensory histidine kinase in two-component regulatory system with KdpE: signal sensing protein	fused sensory histidine kinase in two&#8209;component regulatory system with KdpE: signal sensing protein	ECB_00652	snp_nonsynonymous	nonsynonymous	11330
2891	LTEE	Ara-1	50000	REL11330	A	point-mutator	SNP	708381	708381	751	708381	T&rarr;G	<font class=snp_type_nonsynonymous>S251R</font>&nbsp;(<font class=mutation_in_codon>A</font>GC&rarr;<font class=mutation_in_codon>C</font>GC)&nbsp;	kdpB	kdpB	<i>kdpB</i>&nbsp;&larr;	potassium-transporting ATPase subunit B	potassium&#8209;transporting ATPase subunit B	ECB_00654	snp_nonsynonymous	nonsynonymous	11330
2892	LTEE	Ara-1	50000	REL11330	A	point-mutator	SNP	721536	721536	1137	721536	T&rarr;G	<font class=snp_type_nonsynonymous>N379K</font>&nbsp;(AA<font class=mutation_in_codon>T</font>&rarr;AA<font class=mutation_in_codon>G</font>)&nbsp;	phrB	phrB	<i>phrB</i>&nbsp;&rarr;	deoxyribodipyrimidine photolyase, FAD-binding	deoxyribodipyrimidine photolyase, FAD&#8209;binding	ECB_00668	snp_nonsynonymous	nonsynonymous	11330
2893	LTEE	Ara-1	50000	REL11330	A	point-mutator	SNP	724534	724534	157	724534	A&rarr;C	<font class=snp_type_nonsynonymous>I53L</font>&nbsp;(<font class=mutation_in_codon>A</font>TC&rarr;<font class=mutation_in_codon>C</font>TC)&nbsp;	ybgJ	ybgJ	<i>ybgJ</i>&nbsp;&rarr;	predicted enzyme subunit	predicted enzyme subunit	ECB_00671	snp_nonsynonymous	nonsynonymous	11330
2894	LTEE	Ara-1	50000	REL11330	A	point-mutator	SNP	725522	725522	495	725522	T&rarr;G	<font class=snp_type_synonymous>V165V</font>&nbsp;(GT<font class=mutation_in_codon>T</font>&rarr;GT<font class=mutation_in_codon>G</font>)&nbsp;	ybgK	ybgK	<i>ybgK</i>&nbsp;&rarr;	predicted enzyme subunit	predicted enzyme subunit	ECB_00672	snp_synonymous	synonymous	11330
2895	LTEE	Ara-1	50000	REL11330	A	point-mutator	SNP	725676	725676	649	725676	A&rarr;C	<font class=snp_type_nonsynonymous>K217Q</font>&nbsp;(<font class=mutation_in_codon>A</font>AA&rarr;<font class=mutation_in_codon>C</font>AA)&nbsp;	ybgK	ybgK	<i>ybgK</i>&nbsp;&rarr;	predicted enzyme subunit	predicted enzyme subunit	ECB_00672	snp_nonsynonymous	nonsynonymous	11330
2896	LTEE	Ara-1	50000	REL11330	A	point-mutator	SNP	743093	743093	781	743093	G&rarr;A	<font class=snp_type_nonsynonymous>V261M</font>&nbsp;(<font class=mutation_in_codon>G</font>TG&rarr;<font class=mutation_in_codon>A</font>TG)&nbsp;	sucB	sucB	<i>sucB</i>&nbsp;&rarr;	dihydrolipoamide acetyltransferase	dihydrolipoamide acetyltransferase	ECB_00686	snp_nonsynonymous	nonsynonymous	11330
2897	LTEE	Ara-1	50000	REL11330	A	point-mutator	SNP	743633	743633	intergenic (+103/-263)	743633	A&rarr;C	intergenic&nbsp;(+103/&#8209;263)	sucB,sucC	sucB/sucC	<i>sucB</i>&nbsp;&rarr;&nbsp;/&nbsp;&rarr;&nbsp;<i>sucC</i>	dihydrolipoamide acetyltransferase/succinyl-CoA synthetase subunit beta	dihydrolipoamide acetyltransferase/succinyl&#8209;CoA synthetase subunit beta	ECB_00686/ECB_00687	snp_intergenic	intergenic	11330
2898	LTEE	Ara-1	50000	REL11330	A	point-mutator	SNP	750766	750766	1907	750766	T&rarr;G	<font class=snp_type_nonsynonymous>F636C</font>&nbsp;(T<font class=mutation_in_codon>T</font>T&rarr;T<font class=mutation_in_codon>G</font>T)&nbsp;	ybgG	ybgG	<i>ybgG</i>&nbsp;&rarr;	alpha-mannosidase	alpha&#8209;mannosidase	ECB_00691	snp_nonsynonymous	nonsynonymous	11330
2899	LTEE	Ara-1	50000	REL11330	A	point-mutator	SNP	767623	767623	602	767623	T&rarr;G	<font class=snp_type_nonsynonymous>E201A</font>&nbsp;(G<font class=mutation_in_codon>A</font>A&rarr;G<font class=mutation_in_codon>C</font>A)&nbsp;	gpmA	gpmA	<i>gpmA</i>&nbsp;&larr;	phosphoglyceromutase	phosphoglyceromutase	ECB_00708	snp_nonsynonymous	nonsynonymous	11330
2900	LTEE	Ara-1	50000	REL11330	A	point-mutator	SNP	768010	768010	215	768010	T&rarr;G	<font class=snp_type_nonsynonymous>D72A</font>&nbsp;(G<font class=mutation_in_codon>A</font>C&rarr;G<font class=mutation_in_codon>C</font>C)&nbsp;	gpmA	gpmA	<i>gpmA</i>&nbsp;&larr;	phosphoglyceromutase	phosphoglyceromutase	ECB_00708	snp_nonsynonymous	nonsynonymous	11330
2901	LTEE	Ara-1	50000	REL11330	A	point-mutator	SNP	771751	771751	934	771751	A&rarr;C	<font class=snp_type_nonsynonymous>W312G</font>&nbsp;(<font class=mutation_in_codon>T</font>GG&rarr;<font class=mutation_in_codon>G</font>GG)&nbsp;	galE	galE	<i>galE</i>&nbsp;&larr;	UDP-galactose-4-epimerase	UDP&#8209;galactose&#8209;4&#8209;epimerase	ECB_00712	snp_nonsynonymous	nonsynonymous	11330
2902	LTEE	Ara-1	50000	REL11330	A	point-mutator	SNP	779376	779376	162	779376	T&rarr;G	<font class=snp_type_synonymous>V54V</font>&nbsp;(GT<font class=mutation_in_codon>T</font>&rarr;GT<font class=mutation_in_codon>G</font>)&nbsp;	ybhE	ybhE	<i>ybhE</i>&nbsp;&rarr;	6-phosphogluconolactonase	6&#8209;phosphogluconolactonase	ECB_00720	snp_synonymous	synonymous	11330
2903	LTEE	Ara-1	50000	REL11330	A	point-mutator	SNP	783992	783992	intergenic (+43/-140)	783992	T&rarr;G	intergenic&nbsp;(+43/&#8209;140)	ybhI,ybhJ	ybhI/ybhJ	<i>ybhI</i>&nbsp;&rarr;&nbsp;/&nbsp;&rarr;&nbsp;<i>ybhJ</i>	predicted transporter/predicted hydratase	predicted transporter/predicted hydratase	ECB_00723/ECB_00724	snp_intergenic	intergenic	11330
2904	LTEE	Ara-1	50000	REL11330	A	point-mutator	SNP	786559	786559	1259	786559	T&rarr;G	<font class=snp_type_nonsynonymous>K420T</font>&nbsp;(A<font class=mutation_in_codon>A</font>A&rarr;A<font class=mutation_in_codon>C</font>A)&nbsp;	ybhC	ybhC	<i>ybhC</i>&nbsp;&larr;	predicted pectinesterase	predicted pectinesterase	ECB_00725	snp_nonsynonymous	nonsynonymous	11330
2905	LTEE	Ara-1	50000	REL11330	A	point-mutator	SNP	788462	788462	561	788462	T&rarr;G	<font class=snp_type_nonsynonymous>K187N</font>&nbsp;(AA<font class=mutation_in_codon>A</font>&rarr;AA<font class=mutation_in_codon>C</font>)&nbsp;	ECB_00726	ECB_00726	<i>ECB_00726</i>&nbsp;&larr;	integrase	integrase	ECB_00726	snp_nonsynonymous	nonsynonymous	11330
2906	LTEE	Ara-1	50000	REL11330	A	point-mutator	SNP	788776	788776	247	788776	A&rarr;C	<font class=snp_type_nonsynonymous>Y83D</font>&nbsp;(<font class=mutation_in_codon>T</font>AC&rarr;<font class=mutation_in_codon>G</font>AC)&nbsp;	ECB_00726	ECB_00726	<i>ECB_00726</i>&nbsp;&larr;	integrase	integrase	ECB_00726	snp_nonsynonymous	nonsynonymous	11330
2907	LTEE	Ara-1	50000	REL11330	A	point-mutator	SNP	791065	791065	intergenic (+311/-390)	791065	A&rarr;C	intergenic&nbsp;(+311/&#8209;390)	ECB_00731,ECB_00732	ECB_00731/ECB_00732	<i>ECB_00731</i>&nbsp;&rarr;&nbsp;/&nbsp;&rarr;&nbsp;<i>ECB_00732</i>	conserved hypothetical protein/conserved hypothetical protein	conserved hypothetical protein/conserved hypothetical protein	ECB_00731/ECB_00732	snp_intergenic	intergenic	11330
2908	LTEE	Ara-1	50000	REL11330	A	point-mutator	SNP	791672	791672	218	791672	T&rarr;G	<font class=snp_type_nonsynonymous>L73R</font>&nbsp;(C<font class=mutation_in_codon>T</font>T&rarr;C<font class=mutation_in_codon>G</font>T)&nbsp;	ECB_00732	ECB_00732	<i>ECB_00732</i>&nbsp;&rarr;	conserved hypothetical protein	conserved hypothetical protein	ECB_00732	snp_nonsynonymous	nonsynonymous	11330
2909	LTEE	Ara-1	50000	REL11330	A	point-mutator	SNP	797545	797545	791	797545	T&rarr;G	<font class=snp_type_nonsynonymous>I264S</font>&nbsp;(A<font class=mutation_in_codon>T</font>T&rarr;A<font class=mutation_in_codon>G</font>T)&nbsp;	ECB_00738	ECB_00738	<i>ECB_00738</i>&nbsp;&rarr;	hypothetical protein	hypothetical protein	ECB_00738	snp_nonsynonymous	nonsynonymous	11330
2910	LTEE	Ara-1	50000	REL11330	A	point-mutator	SNP	801303	801303	581	801303	A&rarr;C	<font class=snp_type_nonsynonymous>F194C</font>&nbsp;(T<font class=mutation_in_codon>T</font>T&rarr;T<font class=mutation_in_codon>G</font>T)&nbsp;	bioA	bioA	<i>bioA</i>&nbsp;&larr;	adenosylmethionine-8-amino-7-oxononanoate transaminase	adenosylmethionine&#8209;8&#8209;amino&#8209;7&#8209;oxononanoate transaminase	ECB_00741	snp_nonsynonymous	nonsynonymous	11330
2911	LTEE	Ara-1	50000	REL11330	A	point-mutator	SNP	818258	818258	476	818258	A&rarr;C	<font class=snp_type_nonsynonymous>L159R</font>&nbsp;(C<font class=mutation_in_codon>T</font>G&rarr;C<font class=mutation_in_codon>G</font>G)&nbsp;	ybhR	ybhR	<i>ybhR</i>&nbsp;&larr;	predicted transporter subunit: membrane component of ABC superfamily	predicted transporter subunit: membrane component of ABC superfamily	ECB_00759	snp_nonsynonymous	nonsynonymous	11330
2912	LTEE	Ara-1	50000	REL11330	A	point-mutator	SNP	824034	824034	538	824034	A&rarr;C	<font class=snp_type_nonsynonymous>K180Q</font>&nbsp;(<font class=mutation_in_codon>A</font>AG&rarr;<font class=mutation_in_codon>C</font>AG)&nbsp;	rhlE	rhlE	<i>rhlE</i>&nbsp;&rarr;	RNA helicase	RNA helicase	ECB_00764	snp_nonsynonymous	nonsynonymous	11330
2913	LTEE	Ara-1	50000	REL11330	A	point-mutator	SNP	835063	835063	107	835063	T&rarr;G	<font class=snp_type_nonsynonymous>L36R</font>&nbsp;(C<font class=mutation_in_codon>T</font>T&rarr;C<font class=mutation_in_codon>G</font>T)&nbsp;	ybiN	ybiN	<i>ybiN</i>&nbsp;&rarr;	predicted SAM-dependent methyltransferase	predicted SAM&#8209;dependent methyltransferase	ECB_00774	snp_nonsynonymous	nonsynonymous	11330
2914	LTEE	Ara-1	50000	REL11330	A	point-mutator	SNP	837928	837928	178	837928	T&rarr;G	<font class=snp_type_nonsynonymous>T60P</font>&nbsp;(<font class=mutation_in_codon>A</font>CC&rarr;<font class=mutation_in_codon>C</font>CC)&nbsp;	ybiO	ybiO	<i>ybiO</i>&nbsp;&larr;	predicted mechanosensitive channel	predicted mechanosensitive channel	ECB_00775	snp_nonsynonymous	nonsynonymous	11330
2915	LTEE	Ara-1	50000	REL11330	A	point-mutator	SNP	839969	839969	661	839969	T&rarr;G	<font class=snp_type_nonsynonymous>K221Q</font>&nbsp;(<font class=mutation_in_codon>A</font>AA&rarr;<font class=mutation_in_codon>C</font>AA)&nbsp;	glnH	glnH	<i>glnH</i>&nbsp;&larr;	glutamine ABC transporter periplasmic protein	glutamine ABC transporter periplasmic protein	ECB_00778	snp_nonsynonymous	nonsynonymous	11330
2916	LTEE	Ara-1	50000	REL11330	A	point-mutator	SNP	866217	866217	435	866217	T&rarr;G	<font class=snp_type_nonsynonymous>N145K</font>&nbsp;(AA<font class=mutation_in_codon>T</font>&rarr;AA<font class=mutation_in_codon>G</font>)&nbsp;	yliE	yliE	<i>yliE</i>&nbsp;&rarr;	conserved inner membrane protein	conserved inner membrane protein	ECB_00800	snp_nonsynonymous	nonsynonymous	11330
2917	LTEE	Ara-1	50000	REL11330	A	point-mutator	SNP	869618	869618	970	869618	T&rarr;G	<font class=snp_type_nonsynonymous>K324Q</font>&nbsp;(<font class=mutation_in_codon>A</font>AA&rarr;<font class=mutation_in_codon>C</font>AA)&nbsp;	yliG	yliG	<i>yliG</i>&nbsp;&larr;	predicted SAM-dependent methyltransferase	predicted SAM&#8209;dependent methyltransferase	ECB_00802	snp_nonsynonymous	nonsynonymous	11330
2918	LTEE	Ara-1	50000	REL11330	A	point-mutator	SNP	870993	870993	194	870993	A&rarr;C	<font class=snp_type_nonsynonymous>D65A</font>&nbsp;(G<font class=mutation_in_codon>A</font>T&rarr;G<font class=mutation_in_codon>C</font>T)&nbsp;	yliH	yliH	<i>yliH</i>&nbsp;&rarr;	hypothetical protein	hypothetical protein	ECB_00803	snp_nonsynonymous	nonsynonymous	11330
2919	LTEE	Ara-1	50000	REL11330	A	point-mutator	SNP	875009	875009	278	875009	T&rarr;G	<font class=snp_type_nonsynonymous>D93A</font>&nbsp;(G<font class=mutation_in_codon>A</font>T&rarr;G<font class=mutation_in_codon>C</font>T)&nbsp;	deoR	deoR	<i>deoR</i>&nbsp;&larr;	DNA-binding transcriptional repressor	DNA&#8209;binding transcriptional repressor	ECB_00807	snp_nonsynonymous	nonsynonymous	11330
2920	LTEE	Ara-1	50000	REL11330	A	point-mutator	SNP	877676	877676	107	877676	A&rarr;C	<font class=snp_type_nonsynonymous>V36G</font>&nbsp;(G<font class=mutation_in_codon>T</font>T&rarr;G<font class=mutation_in_codon>G</font>T)&nbsp;	ybjH	ybjH	<i>ybjH</i>&nbsp;&larr;	hypothetical protein	hypothetical protein	ECB_00810	snp_nonsynonymous	nonsynonymous	11330
2921	LTEE	Ara-1	50000	REL11330	A	point-mutator	SNP	894179	894179	571	894179	T&rarr;G	<font class=snp_type_nonsynonymous>I191L</font>&nbsp;(<font class=mutation_in_codon>A</font>TT&rarr;<font class=mutation_in_codon>C</font>TT)&nbsp;	ECB_00833	ECB_00833	<i>ECB_00833</i>&nbsp;&larr;	Terminase, ATPase subunit	Terminase, ATPase subunit	ECB_00833	snp_nonsynonymous	nonsynonymous	11330
2922	LTEE	Ara-1	50000	REL11330	A	point-mutator	SNP	898853	898853	252	898853	T&rarr;G	<font class=snp_type_nonsynonymous>I84M</font>&nbsp;(AT<font class=mutation_in_codon>T</font>&rarr;AT<font class=mutation_in_codon>G</font>)&nbsp;	ECB_00842	ECB_00842	<i>ECB_00842</i>&nbsp;&rarr;	phage baseplate assembly protein	phage baseplate assembly protein	ECB_00842	snp_nonsynonymous	nonsynonymous	11330
2923	LTEE	Ara-1	50000	REL11330	A	point-mutator	SNP	910316	910316	intergenic (+176/-175)	910316	T&rarr;C	intergenic&nbsp;(+176/&#8209;175)	ybjN,potF	ybjN/potF	<i>ybjN</i>&nbsp;&rarr;&nbsp;/&nbsp;&rarr;&nbsp;<i>potF</i>	predicted oxidoreductase/putrescine transporter subunit: periplasmic-binding component of ABC superfamily	predicted oxidoreductase/putrescine transporter subunit: periplasmic&#8209;binding component of ABC superfamily	ECB_00858/ECB_00859	snp_intergenic	intergenic	11330
2924	LTEE	Ara-1	50000	REL11330	A	point-mutator	SNP	911501	911501	1011	911501	G&rarr;T	<font class=snp_type_synonymous>P337P</font>&nbsp;(CC<font class=mutation_in_codon>G</font>&rarr;CC<font class=mutation_in_codon>T</font>)&nbsp;	potF	potF	<i>potF</i>&nbsp;&rarr;	putrescine transporter subunit: periplasmic-binding component of ABC superfamily	putrescine transporter subunit: periplasmic&#8209;binding component of ABC superfamily	ECB_00859	snp_synonymous	synonymous	11330
2925	LTEE	Ara-1	50000	REL11330	A	point-mutator	SNP	922946	922946	515	922946	A&rarr;C	<font class=snp_type_nonsynonymous>F172C</font>&nbsp;(T<font class=mutation_in_codon>T</font>C&rarr;T<font class=mutation_in_codon>G</font>C)&nbsp;	ybjS	ybjS	<i>ybjS</i>&nbsp;&larr;	predicted NAD(P)H-binding oxidoreductase with NAD(P)-binding Rossmann-fold domain	predicted NAD(P)H&#8209;binding oxidoreductase with NAD(P)&#8209;binding Rossmann&#8209;fold domain	ECB_00873	snp_nonsynonymous	nonsynonymous	11330
2926	LTEE	Ara-1	50000	REL11330	A	point-mutator	SNP	927951	927951	907	927951	T&rarr;G	<font class=snp_type_nonsynonymous>I303L</font>&nbsp;(<font class=mutation_in_codon>A</font>TC&rarr;<font class=mutation_in_codon>C</font>TC)&nbsp;	hcr	hcr	<i>hcr</i>&nbsp;&larr;	HCP oxidoreductase, NADH-dependent	HCP oxidoreductase, NADH&#8209;dependent	ECB_00877	snp_nonsynonymous	nonsynonymous	11330
2927	LTEE	Ara-1	50000	REL11330	A	point-mutator	SNP	934017	934017	839	934017	T&rarr;G	<font class=snp_type_nonsynonymous>L280W</font>&nbsp;(T<font class=mutation_in_codon>T</font>G&rarr;T<font class=mutation_in_codon>G</font>G)&nbsp;	ybjD	ybjD	<i>ybjD</i>&nbsp;&rarr;	conserved protein with nucleoside triphosphate hydrolase domain	conserved protein with nucleoside triphosphate hydrolase domain	ECB_00881	snp_nonsynonymous	nonsynonymous	11330
2928	LTEE	Ara-1	50000	REL11330	A	point-mutator	SNP	935881	935881	intergenic (-55/-60)	935881	T&rarr;G	intergenic&nbsp;(&#8209;55/&#8209;60)	ybjX,macA	ybjX/macA	<i>ybjX</i>&nbsp;&larr;&nbsp;/&nbsp;&rarr;&nbsp;<i>macA</i>	hypothetical protein/macrolide transporter subunit, membrane fusion protein (MFP) component	hypothetical protein/macrolide transporter subunit, membrane fusion protein (MFP) component	ECB_00882/ECB_00883	snp_intergenic	intergenic	11330
2929	LTEE	Ara-1	50000	REL11330	A	point-mutator	SNP	937322	937322	270	937322	T&rarr;G	<font class=snp_type_nonsynonymous>F90L</font>&nbsp;(TT<font class=mutation_in_codon>T</font>&rarr;TT<font class=mutation_in_codon>G</font>)&nbsp;	macB	macB	<i>macB</i>&nbsp;&rarr;	fused macrolide transporter subunits of ABC superfamily: ATP-binding component/membrane component	fused macrolide transporter subunits of ABC superfamily: ATP&#8209;binding component/membrane component	ECB_00884	snp_nonsynonymous	nonsynonymous	11330
2930	LTEE	Ara-1	50000	REL11330	A	point-mutator	SNP	937562	937562	510	937562	A&rarr;C	<font class=snp_type_nonsynonymous>E170D</font>&nbsp;(GA<font class=mutation_in_codon>A</font>&rarr;GA<font class=mutation_in_codon>C</font>)&nbsp;	macB	macB	<i>macB</i>&nbsp;&rarr;	fused macrolide transporter subunits of ABC superfamily: ATP-binding component/membrane component	fused macrolide transporter subunits of ABC superfamily: ATP&#8209;binding component/membrane component	ECB_00884	snp_nonsynonymous	nonsynonymous	11330
2931	LTEE	Ara-1	50000	REL11330	A	point-mutator	SNP	941033	941033	921	941033	T&rarr;G	<font class=snp_type_synonymous>V307V</font>&nbsp;(GT<font class=mutation_in_codon>T</font>&rarr;GT<font class=mutation_in_codon>G</font>)&nbsp;	clpA	clpA	<i>clpA</i>&nbsp;&rarr;	ATPase and specificity subunit of ClpA-ClpP ATP-dependent serine protease, chaperone activity	ATPase and specificity subunit of ClpA&#8209;ClpP ATP&#8209;dependent serine protease, chaperone activity	ECB_00887	snp_synonymous	synonymous	11330
2932	LTEE	Ara-1	50000	REL11330	A	point-mutator	SNP	969305	969305	1343	969305	T&rarr;G	<font class=snp_type_nonsynonymous>N448T</font>&nbsp;(A<font class=mutation_in_codon>A</font>C&rarr;A<font class=mutation_in_codon>C</font>C)&nbsp;	pflB	pflB	<i>pflB</i>&nbsp;&larr;	pyruvate formate lyase I	pyruvate formate lyase I	ECB_00907	snp_nonsynonymous	nonsynonymous	11330
2933	LTEE	Ara-1	50000	REL11330	A	point-mutator	SNP	984510	984510	798	984510	T&rarr;G	<font class=snp_type_synonymous>V266V</font>&nbsp;(GT<font class=mutation_in_codon>T</font>&rarr;GT<font class=mutation_in_codon>G</font>)&nbsp;	msbA	msbA	<i>msbA</i>&nbsp;&rarr;	fused lipid transporter subunits of ABC superfamily: membrane component/ATP-binding component	fused lipid transporter subunits of ABC superfamily: membrane component/ATP&#8209;binding component	ECB_00918	snp_synonymous	synonymous	11330
2934	LTEE	Ara-1	50000	REL11330	A	point-mutator	SNP	999454	999454	1316	999454	A&rarr;C	<font class=snp_type_nonsynonymous>K439T</font>&nbsp;(A<font class=mutation_in_codon>A</font>A&rarr;A<font class=mutation_in_codon>C</font>A)&nbsp;	ycbB	ycbB	<i>ycbB</i>&nbsp;&rarr;	predicted carboxypeptidase	predicted carboxypeptidase	ECB_00929	snp_nonsynonymous	nonsynonymous	11330
2935	LTEE	Ara-1	50000	REL11330	A	point-mutator	SNP	1000197	1000197	31	1000197	T&rarr;G	<font class=snp_type_nonsynonymous>L11V</font>&nbsp;(<font class=mutation_in_codon>T</font>TG&rarr;<font class=mutation_in_codon>G</font>TG)&nbsp;	ycbK	ycbK	<i>ycbK</i>&nbsp;&rarr;	hypothetical protein	hypothetical protein	ECB_00930	snp_nonsynonymous	nonsynonymous	11330
2936	LTEE	Ara-1	50000	REL11330	A	point-mutator	SNP	1001975	1001975	827	1001975	T&rarr;G	<font class=snp_type_nonsynonymous>K276T</font>&nbsp;(A<font class=mutation_in_codon>A</font>A&rarr;A<font class=mutation_in_codon>C</font>A)&nbsp;	aspC	aspC	<i>aspC</i>&nbsp;&larr;	aspartate aminotransferase, PLP-dependent	aspartate aminotransferase, PLP&#8209;dependent	ECB_00932	snp_nonsynonymous	nonsynonymous	11330
2937	LTEE	Ara-1	50000	REL11330	A	point-mutator	SNP	1003478	1003478	597	1003478	A&rarr;C	<font class=snp_type_synonymous>S199S</font>&nbsp;(TC<font class=mutation_in_codon>T</font>&rarr;TC<font class=mutation_in_codon>G</font>)&nbsp;	ompF	ompF	<i>ompF</i>&nbsp;&larr;	outer membrane porin 1a (Ia;b;F)	outer membrane porin 1a (Ia;b;F)	ECB_00933	snp_synonymous	synonymous	11330
2938	LTEE	Ara-1	50000	REL11330	A	point-mutator	SNP	1004251	1004251	intergenic (-177/+425)	1004251	T&rarr;C	intergenic&nbsp;(&#8209;177/+425)	ompF,asnS	ompF/asnS	<i>ompF</i>&nbsp;&larr;&nbsp;/&nbsp;&larr;&nbsp;<i>asnS</i>	outer membrane porin 1a (Ia;b;F)/asparaginyl-tRNA synthetase	outer membrane porin 1a (Ia;b;F)/asparaginyl&#8209;tRNA synthetase	ECB_00933/ECB_00934	snp_intergenic	intergenic	11330
2939	LTEE	Ara-1	50000	REL11330	A	point-mutator	SNP	1007123	1007123	325	1007123	T&rarr;G	<font class=snp_type_nonsynonymous>I109L</font>&nbsp;(<font class=mutation_in_codon>A</font>TT&rarr;<font class=mutation_in_codon>C</font>TT)&nbsp;	pncB	pncB	<i>pncB</i>&nbsp;&larr;	nicotinate phosphoribosyltransferase	nicotinate phosphoribosyltransferase	ECB_00935	snp_nonsynonymous	nonsynonymous	11330
2940	LTEE	Ara-1	50000	REL11330	A	point-mutator	SNP	1012106	1012106	974	1012106	T&rarr;G	<font class=snp_type_nonsynonymous>D325A</font>&nbsp;(G<font class=mutation_in_codon>A</font>C&rarr;G<font class=mutation_in_codon>C</font>C)&nbsp;	ssuD	ssuD	<i>ssuD</i>&nbsp;&larr;	alkanesulfonate monooxygenase	alkanesulfonate monooxygenase	ECB_00939	snp_nonsynonymous	nonsynonymous	11330
2941	LTEE	Ara-1	50000	REL11330	A	point-mutator	SNP	1014545	1014545	59	1014545	A&rarr;C	<font class=snp_type_nonsynonymous>L20R</font>&nbsp;(C<font class=mutation_in_codon>T</font>G&rarr;C<font class=mutation_in_codon>G</font>G)&nbsp;	ssuE	ssuE	<i>ssuE</i>&nbsp;&larr;	NAD(P)H-dependent FMN reductase	NAD(P)H&#8209;dependent FMN reductase	ECB_00941	snp_nonsynonymous	nonsynonymous	11330
2942	LTEE	Ara-1	50000	REL11330	A	point-mutator	SNP	1016141	1016141	561	1016141	A&rarr;C	<font class=snp_type_synonymous>G187G</font>&nbsp;(GG<font class=mutation_in_codon>A</font>&rarr;GG<font class=mutation_in_codon>C</font>)&nbsp;	ycbR	ycbR	<i>ycbR</i>&nbsp;&rarr;	predicted periplasmic pilin chaperone	predicted periplasmic pilin chaperone	ECB_00943	snp_synonymous	synonymous	11330
2943	LTEE	Ara-1	50000	REL11330	A	point-mutator	SNP	1016891	1016891	585	1016891	T&rarr;G	<font class=snp_type_synonymous>S195S</font>&nbsp;(TC<font class=mutation_in_codon>T</font>&rarr;TC<font class=mutation_in_codon>G</font>)&nbsp;	ycbS	ycbS	<i>ycbS</i>&nbsp;&rarr;	predicted outer membrane usher protein	predicted outer membrane usher protein	ECB_00944	snp_synonymous	synonymous	11330
2944	LTEE	Ara-1	50000	REL11330	A	point-mutator	SNP	1017850	1017850	1544	1017850	A&rarr;C	<font class=snp_type_nonsynonymous>Q515P</font>&nbsp;(C<font class=mutation_in_codon>A</font>G&rarr;C<font class=mutation_in_codon>C</font>G)&nbsp;	ycbS	ycbS	<i>ycbS</i>&nbsp;&rarr;	predicted outer membrane usher protein	predicted outer membrane usher protein	ECB_00944	snp_nonsynonymous	nonsynonymous	11330
2945	LTEE	Ara-1	50000	REL11330	A	point-mutator	SNP	1025189	1025189	255	1025189	T&rarr;G	<font class=snp_type_nonsynonymous>F85L</font>&nbsp;(TT<font class=mutation_in_codon>T</font>&rarr;TT<font class=mutation_in_codon>G</font>)&nbsp;	ycbY	ycbY	<i>ycbY</i>&nbsp;&rarr;	predicted methyltransferase	predicted methyltransferase	ECB_00952	snp_nonsynonymous	nonsynonymous	11330
2946	LTEE	Ara-1	50000	REL11330	A	point-mutator	SNP	1027327	1027327	273	1027327	T&rarr;G	<font class=snp_type_nonsynonymous>I91M</font>&nbsp;(AT<font class=mutation_in_codon>T</font>&rarr;AT<font class=mutation_in_codon>G</font>)&nbsp;	uup	uup	<i>uup</i>&nbsp;&rarr;	fused predicted transporter subunits of ABC superfamily: ATP-binding components	fused predicted transporter subunits of ABC superfamily: ATP&#8209;binding components	ECB_00953	snp_nonsynonymous	nonsynonymous	11330
2947	LTEE	Ara-1	50000	REL11330	A	point-mutator	SNP	1035656	1035656	81	1035656	A&rarr;C	<font class=snp_type_nonsynonymous>L27F</font>&nbsp;(TT<font class=mutation_in_codon>A</font>&rarr;TT<font class=mutation_in_codon>C</font>)&nbsp;	ycbG	ycbG	<i>ycbG</i>&nbsp;&rarr;	hypothetical protein	hypothetical protein	ECB_00960	snp_nonsynonymous	nonsynonymous	11330
2948	LTEE	Ara-1	50000	REL11330	A	point-mutator	SNP	1035674	1035674	99	1035674	A&rarr;C	<font class=snp_type_nonsynonymous>E33D</font>&nbsp;(GA<font class=mutation_in_codon>A</font>&rarr;GA<font class=mutation_in_codon>C</font>)&nbsp;	ycbG	ycbG	<i>ycbG</i>&nbsp;&rarr;	hypothetical protein	hypothetical protein	ECB_00960	snp_nonsynonymous	nonsynonymous	11330
2949	LTEE	Ara-1	50000	REL11330	A	point-mutator	SNP	1042577	1042577	1016	1042577	A&rarr;C	<font class=snp_type_nonsynonymous>E339A</font>&nbsp;(G<font class=mutation_in_codon>A</font>A&rarr;G<font class=mutation_in_codon>C</font>A)&nbsp;	helD	helD	<i>helD</i>&nbsp;&rarr;	DNA helicase IV	DNA helicase IV	ECB_00966	snp_nonsynonymous	nonsynonymous	11330
2950	LTEE	Ara-1	50000	REL11330	A	point-mutator	SNP	1044908	1044908	intergenic (-44/-129)	1044908	A&rarr;C	intergenic&nbsp;(&#8209;44/&#8209;129)	yccT,yccU	yccT/yccU	<i>yccT</i>&nbsp;&larr;&nbsp;/&nbsp;&rarr;&nbsp;<i>yccU</i>	hypothetical protein/predicted CoA-binding protein with NAD(P)-binding Rossmann-fold domain	hypothetical protein/predicted CoA&#8209;binding protein with NAD(P)&#8209;binding Rossmann&#8209;fold domain	ECB_00968/ECB_00969	snp_intergenic	intergenic	11330
2951	LTEE	Ara-1	50000	REL11330	A	point-mutator	SNP	1051540	1051540	1196	1051540	A&rarr;C	<font class=snp_type_nonsynonymous>K399T</font>&nbsp;(A<font class=mutation_in_codon>A</font>A&rarr;A<font class=mutation_in_codon>C</font>A)&nbsp;	hyaB	hyaB	<i>hyaB</i>&nbsp;&rarr;	hydrogenase 1, large subunit	hydrogenase 1, large subunit	ECB_00976	snp_nonsynonymous	nonsynonymous	11330
2952	LTEE	Ara-1	50000	REL11330	A	point-mutator	SNP	1052737	1052737	581	1052737	T&rarr;G	<font class=snp_type_nonsynonymous>F194C</font>&nbsp;(T<font class=mutation_in_codon>T</font>T&rarr;T<font class=mutation_in_codon>G</font>T)&nbsp;	hyaC	hyaC	<i>hyaC</i>&nbsp;&rarr;	hydrogenase 1, b-type cytochrome subunit	hydrogenase 1, b&#8209;type cytochrome subunit	ECB_00977	snp_nonsynonymous	nonsynonymous	11330
2953	LTEE	Ara-1	50000	REL11330	A	point-mutator	SNP	1052859	1052859	703	1052859	T&rarr;G	<font class=snp_type_nonsynonymous>S235A</font>&nbsp;(<font class=mutation_in_codon>T</font>CA&rarr;<font class=mutation_in_codon>G</font>CA)&nbsp;	hyaC	hyaC	<i>hyaC</i>&nbsp;&rarr;	hydrogenase 1, b-type cytochrome subunit	hydrogenase 1, b&#8209;type cytochrome subunit	ECB_00977	snp_nonsynonymous	nonsynonymous	11330
2954	LTEE	Ara-1	50000	REL11330	A	point-mutator	SNP	1053748	1053748	304	1053748	A&rarr;C	<font class=snp_type_nonsynonymous>N102H</font>&nbsp;(<font class=mutation_in_codon>A</font>AC&rarr;<font class=mutation_in_codon>C</font>AC)&nbsp;	hyaE	hyaE	<i>hyaE</i>&nbsp;&rarr;	protein involved in processing of HyaA and HyaB proteins	protein involved in processing of HyaA and HyaB proteins	ECB_00979	snp_nonsynonymous	nonsynonymous	11330
2955	LTEE	Ara-1	50000	REL11330	A	point-mutator	SNP	1055171	1055171	341	1055171	T&rarr;G	<font class=snp_type_nonsynonymous>F114C</font>&nbsp;(T<font class=mutation_in_codon>T</font>C&rarr;T<font class=mutation_in_codon>G</font>C)&nbsp;	appC	appC	<i>appC</i>&nbsp;&rarr;	cytochrome bd-II oxidase, subunit I	cytochrome bd&#8209;II oxidase, subunit I	ECB_00981	snp_nonsynonymous	nonsynonymous	11330
2956	LTEE	Ara-1	50000	REL11330	A	point-mutator	SNP	1056949	1056949	563	1056949	T&rarr;G	<font class=snp_type_nonsense>L188*</font>&nbsp;(T<font class=mutation_in_codon>T</font>A&rarr;T<font class=mutation_in_codon>G</font>A)&nbsp;	appB	appB	<i>appB</i>&nbsp;&rarr;	cytochrome bd-II oxidase, subunit II	cytochrome bd&#8209;II oxidase, subunit II	ECB_00982	snp_nonsense	nonsense	11330
2957	LTEE	Ara-1	50000	REL11330	A	point-mutator	SNP	1057973	1057973	266	1057973	T&rarr;G	<font class=snp_type_nonsynonymous>V89G</font>&nbsp;(G<font class=mutation_in_codon>T</font>A&rarr;G<font class=mutation_in_codon>G</font>A)&nbsp;	appA	appA	<i>appA</i>&nbsp;&rarr;	phosphoanhydride phosphorylase	phosphoanhydride phosphorylase	ECB_00983	snp_nonsynonymous	nonsynonymous	11330
2958	LTEE	Ara-1	50000	REL11330	A	point-mutator	SNP	1061648	1061648	120	1061648	A&rarr;C	<font class=snp_type_synonymous>G40G</font>&nbsp;(GG<font class=mutation_in_codon>T</font>&rarr;GG<font class=mutation_in_codon>G</font>)&nbsp;	yccY	yccY	<i>yccY</i>&nbsp;&larr;	phosphotyrosine-protein phosphatase	phosphotyrosine&#8209;protein phosphatase	ECB_00985	snp_synonymous	synonymous	11330
2959	LTEE	Ara-1	50000	REL11330	A	point-mutator	SNP	1062586	1062586	309	1062586	T&rarr;G	<font class=snp_type_synonymous>L103L</font>&nbsp;(CT<font class=mutation_in_codon>A</font>&rarr;CT<font class=mutation_in_codon>C</font>)&nbsp;	yccZ	yccZ	<i>yccZ</i>&nbsp;&larr;	predicted exopolysaccharide export protein	predicted exopolysaccharide export protein	ECB_00986	snp_synonymous	synonymous	11330
2960	LTEE	Ara-1	50000	REL11330	A	point-mutator	SNP	1064798	1064798	239	1064798	T&rarr;G	<font class=snp_type_nonsynonymous>E80A</font>&nbsp;(G<font class=mutation_in_codon>A</font>A&rarr;G<font class=mutation_in_codon>C</font>A)&nbsp;	ymcA	ymcA	<i>ymcA</i>&nbsp;&larr;	hypothetical protein	hypothetical protein	ECB_00987	snp_nonsynonymous	nonsynonymous	11330
2961	LTEE	Ara-1	50000	REL11330	A	point-mutator	SNP	1067671	1067671	intergenic (-205/-81)	1067671	T&rarr;G	intergenic&nbsp;(&#8209;205/&#8209;81)	cspH,cspG	cspH/cspG	<i>cspH</i>&nbsp;&larr;&nbsp;/&nbsp;&rarr;&nbsp;<i>cspG</i>	stress protein, member of the CspA-family/DNA-binding transcriptional regulator	stress protein, member of the CspA&#8209;family/DNA&#8209;binding transcriptional regulator	ECB_00991/ECB_00992	snp_intergenic	intergenic	11330
2962	LTEE	Ara-1	50000	REL11330	A	point-mutator	SNP	1076739	1076739	1194	1076739	T&rarr;G	<font class=snp_type_nonsynonymous>I398M</font>&nbsp;(AT<font class=mutation_in_codon>T</font>&rarr;AT<font class=mutation_in_codon>G</font>)&nbsp;	torA	torA	<i>torA</i>&nbsp;&rarr;	trimethylamine N-oxide (TMAO) reductase I, catalytic subunit	trimethylamine N&#8209;oxide (TMAO) reductase I, catalytic subunit	ECB_01000	snp_nonsynonymous	nonsynonymous	11330
2963	LTEE	Ara-1	50000	REL11330	A	point-mutator	SNP	1079282	1079282	784	1079282	T&rarr;G	<font class=snp_type_nonsynonymous>K262Q</font>&nbsp;(<font class=mutation_in_codon>A</font>AA&rarr;<font class=mutation_in_codon>C</font>AA)&nbsp;	cbpA	cbpA	<i>cbpA</i>&nbsp;&larr;	curved DNA-binding protein, DnaJ homologue that functions as a co-chaperone of DnaK	curved DNA&#8209;binding protein, DnaJ homologue that functions as a co&#8209;chaperone of DnaK	ECB_01003	snp_nonsynonymous	nonsynonymous	11330
2964	LTEE	Ara-1	50000	REL11330	A	point-mutator	SNP	1086834	1086834	406	1086834	A&rarr;C	<font class=snp_type_nonsynonymous>C136G</font>&nbsp;(<font class=mutation_in_codon>T</font>GC&rarr;<font class=mutation_in_codon>G</font>GC)&nbsp;	ycdI	ycdI	<i>ycdI</i>&nbsp;&larr;	hypothetical protein	hypothetical protein	ECB_01011	snp_nonsynonymous	nonsynonymous	11330
2965	LTEE	Ara-1	50000	REL11330	A	point-mutator	SNP	1087261	1087261	789	1087261	T&rarr;G	<font class=snp_type_nonsynonymous>E263D</font>&nbsp;(GA<font class=mutation_in_codon>A</font>&rarr;GA<font class=mutation_in_codon>C</font>)&nbsp;	ycdJ	ycdJ	<i>ycdJ</i>&nbsp;&larr;	predicted hydrolase	predicted hydrolase	ECB_01012	snp_nonsynonymous	nonsynonymous	11330
2966	LTEE	Ara-1	50000	REL11330	A	point-mutator	SNP	1090633	1090633	108	1090633	T&rarr;G	<font class=snp_type_nonsynonymous>F36L</font>&nbsp;(TT<font class=mutation_in_codon>T</font>&rarr;TT<font class=mutation_in_codon>G</font>)&nbsp;	ycdC	ycdC	<i>ycdC</i>&nbsp;&rarr;	predicted DNA-binding transcriptional regulator	predicted DNA&#8209;binding transcriptional regulator	ECB_01016	snp_nonsynonymous	nonsynonymous	11330
2967	LTEE	Ara-1	50000	REL11330	A	point-mutator	SNP	1097604	1097604	intergenic (+507/-27)	1097604	T&rarr;G	intergenic&nbsp;(+507/&#8209;27)	putP,ycdN	putP/ycdN	<i>putP</i>&nbsp;&rarr;&nbsp;/&nbsp;&rarr;&nbsp;<i>ycdN</i>	proline:sodium symporter/putative membrane protein	proline:sodium symporter/putative membrane protein	ECB_01018/ECB_01019	snp_intergenic	intergenic	11330
2968	LTEE	Ara-1	50000	REL11330	A	point-mutator	SNP	1100289	1100289	629	1100289	G&rarr;T	<font class=snp_type_nonsynonymous>R210L</font>&nbsp;(C<font class=mutation_in_codon>G</font>G&rarr;C<font class=mutation_in_codon>T</font>G)&nbsp;	ycdB	ycdB	<i>ycdB</i>&nbsp;&rarr;	hypothetical protein	hypothetical protein	ECB_01021	snp_nonsynonymous	nonsynonymous	11330
2969	LTEE	Ara-1	50000	REL11330	A	point-mutator	SNP	1101690	1101690	414	1101690	T&rarr;G	<font class=snp_type_synonymous>G138G</font>&nbsp;(GG<font class=mutation_in_codon>T</font>&rarr;GG<font class=mutation_in_codon>G</font>)&nbsp;	phoH	phoH	<i>phoH</i>&nbsp;&rarr;	conserved protein with nucleoside triphosphate hydrolase domain	conserved protein with nucleoside triphosphate hydrolase domain	ECB_01022	snp_synonymous	synonymous	11330
2970	LTEE	Ara-1	50000	REL11330	A	point-mutator	SNP	1104375	1104375	1768	1104375	A&rarr;C	<font class=snp_type_nonsynonymous>L590V</font>&nbsp;(<font class=mutation_in_codon>T</font>TG&rarr;<font class=mutation_in_codon>G</font>TG)&nbsp;	ycdR	ycdR	<i>ycdR</i>&nbsp;&larr;	predicted enzyme associated with biofilm formation	predicted enzyme associated with biofilm formation	ECB_01025	snp_nonsynonymous	nonsynonymous	11330
2971	LTEE	Ara-1	50000	REL11330	A	point-mutator	SNP	1105099	1105099	1044	1105099	T&rarr;G	<font class=snp_type_synonymous>I348I</font>&nbsp;(AT<font class=mutation_in_codon>A</font>&rarr;AT<font class=mutation_in_codon>C</font>)&nbsp;	ycdR	ycdR	<i>ycdR</i>&nbsp;&larr;	predicted enzyme associated with biofilm formation	predicted enzyme associated with biofilm formation	ECB_01025	snp_synonymous	synonymous	11330
2972	LTEE	Ara-1	50000	REL11330	A	point-mutator	SNP	1112671	1112671	217	1112671	A&rarr;C	<font class=snp_type_nonsynonymous>K73Q</font>&nbsp;(<font class=mutation_in_codon>A</font>AG&rarr;<font class=mutation_in_codon>C</font>AG)&nbsp;	ycdW	ycdW	<i>ycdW</i>&nbsp;&rarr;	2-ketoacid reductase	2&#8209;ketoacid reductase	ECB_01030	snp_nonsynonymous	nonsynonymous	11330
2973	LTEE	Ara-1	50000	REL11330	A	point-mutator	SNP	1119023	1119023	8	1119023	T&rarr;G	<font class=snp_type_nonsynonymous>L3R</font>&nbsp;(C<font class=mutation_in_codon>T</font>T&rarr;C<font class=mutation_in_codon>G</font>T)&nbsp;	csgA	csgA	<i>csgA</i>&nbsp;&rarr;	cryptic curlin major subunit	cryptic curlin major subunit	ECB_01039	snp_nonsynonymous	nonsynonymous	11330
2974	LTEE	Ara-1	50000	REL11330	A	point-mutator	SNP	1120708	1120708	320	1120708	T&rarr;G	<font class=snp_type_nonsynonymous>L107R</font>&nbsp;(C<font class=mutation_in_codon>T</font>G&rarr;C<font class=mutation_in_codon>G</font>G)&nbsp;	ymdB	ymdB	<i>ymdB</i>&nbsp;&rarr;	hypothetical protein	hypothetical protein	ECB_01042	snp_nonsynonymous	nonsynonymous	11330
2975	LTEE	Ara-1	50000	REL11330	A	point-mutator	SNP	1121972	1121972	1049	1121972	A&rarr;C	<font class=snp_type_nonsynonymous>E350A</font>&nbsp;(G<font class=mutation_in_codon>A</font>A&rarr;G<font class=mutation_in_codon>C</font>A)&nbsp;	ymdC	ymdC	<i>ymdC</i>&nbsp;&rarr;	predicted hydrolase	predicted hydrolase	ECB_01043	snp_nonsynonymous	nonsynonymous	11330
2976	LTEE	Ara-1	50000	REL11330	A	point-mutator	SNP	1131220	1131220	intergenic (-69/-156)	1131220	A&rarr;C	intergenic&nbsp;(&#8209;69/&#8209;156)	htrB,yceA	htrB/yceA	<i>htrB</i>&nbsp;&larr;&nbsp;/&nbsp;&rarr;&nbsp;<i>yceA</i>	lipid A biosynthesis lauroyl acyltransferase/hypothetical protein	lipid A biosynthesis lauroyl acyltransferase/hypothetical protein	ECB_01050/ECB_01051	snp_intergenic	intergenic	11330
2977	LTEE	Ara-1	50000	REL11330	A	point-mutator	SNP	1136897	1136897	283	1136897	T&rarr;G	<font class=snp_type_nonsynonymous>N95H</font>&nbsp;(<font class=mutation_in_codon>A</font>AC&rarr;<font class=mutation_in_codon>C</font>AC)&nbsp;	pyrC	pyrC	<i>pyrC</i>&nbsp;&larr;	dihydroorotase	dihydroorotase	ECB_01058	snp_nonsynonymous	nonsynonymous	11330
2978	LTEE	Ara-1	50000	REL11330	A	point-mutator	SNP	1145382	1145382	54	1145382	T&rarr;G	<font class=snp_type_nonsynonymous>L18F</font>&nbsp;(TT<font class=mutation_in_codon>A</font>&rarr;TT<font class=mutation_in_codon>C</font>)&nbsp;	flgA	flgA	<i>flgA</i>&nbsp;&larr;	flagellar basal body P-ring biosynthesis protein A	flagellar basal body P&#8209;ring biosynthesis protein A	ECB_01068	snp_nonsynonymous	nonsynonymous	11330
2979	LTEE	Ara-1	50000	REL11330	A	point-mutator	SNP	1159505	1159505	intergenic (+114/-4)	1159505	A&rarr;C	intergenic&nbsp;(+114/&#8209;4)	ECB_01081,rluC	ECB_01081/rluC	<i>ECB_01081</i>&nbsp;&rarr;&nbsp;/&nbsp;&rarr;&nbsp;<i>rluC</i>	hypothetical protein/23S rRNA pseudouridylate synthase	hypothetical protein/23S rRNA pseudouridylate synthase	ECB_01081/ECB_01082	snp_intergenic	intergenic	11330
2980	LTEE	Ara-1	50000	REL11330	A	point-mutator	SNP	1161679	1161679	317	1161679	A&rarr;C	<font class=snp_type_nonsynonymous>Y106S</font>&nbsp;(T<font class=mutation_in_codon>A</font>T&rarr;T<font class=mutation_in_codon>C</font>T)&nbsp;	yceD	yceD	<i>yceD</i>&nbsp;&rarr;	hypothetical protein	hypothetical protein	ECB_01084	snp_nonsynonymous	nonsynonymous	11330
2981	LTEE	Ara-1	50000	REL11330	A	point-mutator	SNP	1162823	1162823	634	1162823	A&rarr;C	<font class=snp_type_nonsynonymous>I212L</font>&nbsp;(<font class=mutation_in_codon>A</font>TC&rarr;<font class=mutation_in_codon>C</font>TC)&nbsp;	plsX	plsX	<i>plsX</i>&nbsp;&rarr;	fatty acid/phospholipid synthesis protein	fatty acid/phospholipid synthesis protein	ECB_01086	snp_nonsynonymous	nonsynonymous	11330
2982	LTEE	Ara-1	50000	REL11330	A	point-mutator	SNP	1166387	1166387	204	1166387	T&rarr;G	<font class=snp_type_synonymous>A68A</font>&nbsp;(GC<font class=mutation_in_codon>T</font>&rarr;GC<font class=mutation_in_codon>G</font>)&nbsp;	acpP	acpP	<i>acpP</i>&nbsp;&rarr;	acyl carrier protein	acyl carrier protein	ECB_01090	snp_synonymous	synonymous	11330
2983	LTEE	Ara-1	50000	REL11330	A	point-mutator	SNP	1169456	1169456	776	1169456	A&rarr;C	<font class=snp_type_nonsynonymous>K259T</font>&nbsp;(A<font class=mutation_in_codon>A</font>A&rarr;A<font class=mutation_in_codon>C</font>A)&nbsp;	yceG	yceG	<i>yceG</i>&nbsp;&rarr;	predicted aminodeoxychorismate lyase	predicted aminodeoxychorismate lyase	ECB_01093	snp_nonsynonymous	nonsynonymous	11330
2984	LTEE	Ara-1	50000	REL11330	A	point-mutator	SNP	1174059	1174059	2062	1174059	T&rarr;G	<font class=snp_type_nonsynonymous>T688P</font>&nbsp;(<font class=mutation_in_codon>A</font>CG&rarr;<font class=mutation_in_codon>C</font>CG)&nbsp;	fhuE	fhuE	<i>fhuE</i>&nbsp;&larr;	ferric-rhodotorulic acid outer membrane transporter	ferric&#8209;rhodotorulic acid outer membrane transporter	ECB_01098	snp_nonsynonymous	nonsynonymous	11330
2985	LTEE	Ara-1	50000	REL11330	A	point-mutator	SNP	1175474	1175474	647	1175474	T&rarr;G	<font class=snp_type_nonsynonymous>E216A</font>&nbsp;(G<font class=mutation_in_codon>A</font>A&rarr;G<font class=mutation_in_codon>C</font>A)&nbsp;	fhuE	fhuE	<i>fhuE</i>&nbsp;&larr;	ferric-rhodotorulic acid outer membrane transporter	ferric&#8209;rhodotorulic acid outer membrane transporter	ECB_01098	snp_nonsynonymous	nonsynonymous	11330
2986	LTEE	Ara-1	50000	REL11330	A	point-mutator	SNP	1176345	1176345	intergenic (-225/-109)	1176345	T&rarr;G	intergenic&nbsp;(&#8209;225/&#8209;109)	fhuE,ycfF	fhuE/ycfF	<i>fhuE</i>&nbsp;&larr;&nbsp;/&nbsp;&rarr;&nbsp;<i>ycfF</i>	ferric-rhodotorulic acid outer membrane transporter/purine nucleoside phosphoramidase	ferric&#8209;rhodotorulic acid outer membrane transporter/purine nucleoside phosphoramidase	ECB_01098/ECB_01099	snp_intergenic	intergenic	11330
2987	LTEE	Ara-1	50000	REL11330	A	point-mutator	SNP	1184149	1184149	821	1184149	A&rarr;C	<font class=snp_type_nonsynonymous>L274R</font>&nbsp;(C<font class=mutation_in_codon>T</font>G&rarr;C<font class=mutation_in_codon>G</font>G)&nbsp;	ycfS	ycfS	<i>ycfS</i>&nbsp;&larr;	hypothetical protein	hypothetical protein	ECB_01109	snp_nonsynonymous	nonsynonymous	11330
2988	LTEE	Ara-1	50000	REL11330	A	point-mutator	SNP	1202149	1202149	936	1202149	A&rarr;C	<font class=snp_type_nonsynonymous>E312D</font>&nbsp;(GA<font class=mutation_in_codon>A</font>&rarr;GA<font class=mutation_in_codon>C</font>)&nbsp;	pepT	pepT	<i>pepT</i>&nbsp;&rarr;	peptidase T	peptidase T	ECB_01125	snp_nonsynonymous	nonsynonymous	11330
2989	LTEE	Ara-1	50000	REL11330	A	point-mutator	SNP	1203670	1203670	intergenic (-60/+16)	1203670	T&rarr;G	intergenic&nbsp;(&#8209;60/+16)	ycfD,phoQ	ycfD/phoQ	<i>ycfD</i>&nbsp;&larr;&nbsp;/&nbsp;&larr;&nbsp;<i>phoQ</i>	hypothetical protein/sensory histidine kinase in two-compoent regulatory system with PhoP	hypothetical protein/sensory histidine kinase in two&#8209;compoent regulatory system with PhoP	ECB_01126/ECB_01127	snp_intergenic	intergenic	11330
2990	LTEE	Ara-1	50000	REL11330	A	point-mutator	SNP	1207988	1207988	13	1207988	A&rarr;C	<font class=snp_type_nonsynonymous>Y5D</font>&nbsp;(<font class=mutation_in_codon>T</font>AC&rarr;<font class=mutation_in_codon>G</font>AC)&nbsp;	ycfC	ycfC	<i>ycfC</i>&nbsp;&larr;	hypothetical protein	hypothetical protein	ECB_01130	snp_nonsynonymous	nonsynonymous	11330
2991	LTEE	Ara-1	50000	REL11330	A	point-mutator	SNP	1209825	1209825	496	1209825	T&rarr;G	<font class=snp_type_nonsynonymous>S166R</font>&nbsp;(<font class=mutation_in_codon>A</font>GC&rarr;<font class=mutation_in_codon>C</font>GC)&nbsp;	ymfC	ymfC	<i>ymfC</i>&nbsp;&larr;	23S rRNA pseudouridine synthase	23S rRNA pseudouridine synthase	ECB_01133	snp_nonsynonymous	nonsynonymous	11330
2992	LTEE	Ara-1	50000	REL11330	A	point-mutator	SNP	1216957	1216957	49	1216957	A&rarr;C	<font class=snp_type_nonsynonymous>K17Q</font>&nbsp;(<font class=mutation_in_codon>A</font>AA&rarr;<font class=mutation_in_codon>C</font>AA)&nbsp;	ymgC	ymgC	<i>ymgC</i>&nbsp;&rarr;	hypothetical protein	hypothetical protein	ECB_01142	snp_nonsynonymous	nonsynonymous	11330
2993	LTEE	Ara-1	50000	REL11330	A	point-mutator	SNP	1218309	1218309	821	1218309	A&rarr;C	<font class=snp_type_nonsynonymous>E274A</font>&nbsp;(G<font class=mutation_in_codon>A</font>A&rarr;G<font class=mutation_in_codon>C</font>A)&nbsp;	ycgG	ycgG	<i>ycgG</i>&nbsp;&rarr;	conserved inner membrane protein	conserved inner membrane protein	ECB_01143	snp_nonsynonymous	nonsynonymous	11330
2994	LTEE	Ara-1	50000	REL11330	A	point-mutator	SNP	1221347	1221347	pseudogene (1586/2622 nt)	1221347	A&rarr;C	pseudogene&nbsp;(1586/2622&nbsp;nt)	ycgH	ycgH	<i>ycgH</i>&nbsp;&rarr;	predicted protein; b4491	predicted protein; b4491	ECB_01145	snp_pseudogene	pseudogene	11330
2995	LTEE	Ara-1	50000	REL11330	A	point-mutator	SNP	1221358	1221358	pseudogene (1597/2622 nt)	1221358	T&rarr;G	pseudogene&nbsp;(1597/2622&nbsp;nt)	ycgH	ycgH	<i>ycgH</i>&nbsp;&rarr;	predicted protein; b4491	predicted protein; b4491	ECB_01145	snp_pseudogene	pseudogene	11330
2996	LTEE	Ara-1	50000	REL11330	A	point-mutator	SNP	1227428	1227428	206	1227428	T&rarr;G	<font class=snp_type_nonsynonymous>E69A</font>&nbsp;(G<font class=mutation_in_codon>A</font>A&rarr;G<font class=mutation_in_codon>C</font>A)&nbsp;	ycgK	ycgK	<i>ycgK</i>&nbsp;&larr;	hypothetical protein	hypothetical protein	ECB_01153	snp_nonsynonymous	nonsynonymous	11330
2997	LTEE	Ara-1	50000	REL11330	A	point-mutator	SNP	1228218	1228218	intergenic (+50/-22)	1228218	A&rarr;C	intergenic&nbsp;(+50/&#8209;22)	ycgL,ycgM	ycgL/ycgM	<i>ycgL</i>&nbsp;&rarr;&nbsp;/&nbsp;&rarr;&nbsp;<i>ycgM</i>	hypothetical protein/predicted isomerase/hydrolase	hypothetical protein/predicted isomerase/hydrolase	ECB_01154/ECB_01155	snp_intergenic	intergenic	11330
2998	LTEE	Ara-1	50000	REL11330	A	point-mutator	SNP	1244728	1244728	intergenic (-51/-150)	1244728	A&rarr;C	intergenic&nbsp;(&#8209;51/&#8209;150)	ycgR,ymgE	ycgR/ymgE	<i>ycgR</i>&nbsp;&larr;&nbsp;/&nbsp;&rarr;&nbsp;<i>ymgE</i>	protein involved in flagellar function/predicted inner membrane protein	protein involved in flagellar function/predicted inner membrane protein	ECB_01169/ECB_01170	snp_intergenic	intergenic	11330
2999	LTEE	Ara-1	50000	REL11330	A	point-mutator	SNP	1246198	1246198	1329	1246198	A&rarr;C	<font class=snp_type_nonsynonymous>S443R</font>&nbsp;(AG<font class=mutation_in_codon>T</font>&rarr;AG<font class=mutation_in_codon>G</font>)&nbsp;	treA	treA	<i>treA</i>&nbsp;&larr;	periplasmic trehalase	periplasmic trehalase	ECB_01172	snp_nonsynonymous	nonsynonymous	11330
3000	LTEE	Ara-1	50000	REL11330	A	point-mutator	SNP	1248380	1248380	885	1248380	A&rarr;C	<font class=snp_type_nonsynonymous>D295E</font>&nbsp;(GA<font class=mutation_in_codon>T</font>&rarr;GA<font class=mutation_in_codon>G</font>)&nbsp;	dhaM	dhaM	<i>dhaM</i>&nbsp;&larr;	fused predicted dihydroxyacetone-specific PTS enzymes: HPr component/EI component	fused predicted dihydroxyacetone&#8209;specific PTS enzymes: HPr component/EI component	ECB_01173	snp_nonsynonymous	nonsynonymous	11330
3001	LTEE	Ara-1	50000	REL11330	A	point-mutator	SNP	1249588	1249588	320	1249588	T&rarr;G	<font class=snp_type_nonsynonymous>Y107S</font>&nbsp;(T<font class=mutation_in_codon>A</font>T&rarr;T<font class=mutation_in_codon>C</font>T)&nbsp;	dhaL	dhaL	<i>dhaL</i>&nbsp;&larr;	dihydroxyacetone kinase, C-terminal domain	dihydroxyacetone kinase, C&#8209;terminal domain	ECB_01174	snp_nonsynonymous	nonsynonymous	11330
3002	LTEE	Ara-1	50000	REL11330	A	point-mutator	SNP	1252301	1252301	1086	1252301	A&rarr;C	<font class=snp_type_synonymous>A362A</font>&nbsp;(GC<font class=mutation_in_codon>A</font>&rarr;GC<font class=mutation_in_codon>C</font>)&nbsp;	dhaR	dhaR	<i>dhaR</i>&nbsp;&rarr;	predicted DNA-binding transcriptional regulator, dihydroxyacetone	predicted DNA&#8209;binding transcriptional regulator, dihydroxyacetone	ECB_01176	snp_synonymous	synonymous	11330
3003	LTEE	Ara-1	50000	REL11330	A	point-mutator	SNP	1259103	1259103	163	1259103	A&rarr;C	<font class=snp_type_nonsynonymous>I55L</font>&nbsp;(<font class=mutation_in_codon>A</font>TT&rarr;<font class=mutation_in_codon>C</font>TT)&nbsp;	ychH	ychH	<i>ychH</i>&nbsp;&rarr;	predicted inner membrane protein	predicted inner membrane protein	ECB_01180	snp_nonsynonymous	nonsynonymous	11330
3004	LTEE	Ara-1	50000	REL11330	A	point-mutator	DEL	1269579	1270663	NA	1269579	&Delta;1,085&nbsp;bp	IS<i>150</i>&#8209;mediated	ldrB,ldrC	ldrB–ldrC	<i>ldrB</i>&#8211;<i>ldrC</i>	ldrB, ldrC	<i>ldrB, ldrC</i>	[ECB_01192]–[ECB_01193]	large_deletion	not_snp	11330
3005	LTEE	Ara-1	50000	REL11330	A	point-mutator	MOB	1270660	1270663	intergenic (-167/+235)	1270660	IS<i>150</i>&nbsp;(&#8211;)&nbsp;+4&nbsp;bp	intergenic&nbsp;(&#8209;167/+235)	ldrC,chaA	ldrC/chaA	<i>ldrC</i>&nbsp;&larr;&nbsp;/&nbsp;&larr;&nbsp;<i>chaA</i>	toxic polypeptide, small/calcium/sodium:proton antiporter	toxic polypeptide, small/calcium/sodium:proton antiporter	ECB_01193/ECB_01194	mobile_element_insertion	not_snp	11330
3006	LTEE	Ara-1	50000	REL11330	A	point-mutator	SNP	1270802	1270802	intergenic (-309/+96)	1270802	T&rarr;G	intergenic&nbsp;(&#8209;309/+96)	ldrC,chaA	ldrC/chaA	<i>ldrC</i>&nbsp;&larr;&nbsp;/&nbsp;&larr;&nbsp;<i>chaA</i>	toxic polypeptide, small/calcium/sodium:proton antiporter	toxic polypeptide, small/calcium/sodium:proton antiporter	ECB_01193/ECB_01194	snp_intergenic	intergenic	11330
3007	LTEE	Ara-1	50000	REL11330	A	point-mutator	SNP	1276107	1276107	1662	1276107	T&rarr;G	<font class=snp_type_synonymous>I554I</font>&nbsp;(AT<font class=mutation_in_codon>A</font>&rarr;AT<font class=mutation_in_codon>C</font>)&nbsp;	narX	narX	<i>narX</i>&nbsp;&larr;	sensory histidine kinase in two-component regulatory system with NarL	sensory histidine kinase in two&#8209;component regulatory system with NarL	ECB_01200	snp_synonymous	synonymous	11330
3008	LTEE	Ara-1	50000	REL11330	A	point-mutator	SNP	1277282	1277282	487	1277282	T&rarr;G	<font class=snp_type_nonsynonymous>M163L</font>&nbsp;(<font class=mutation_in_codon>A</font>TG&rarr;<font class=mutation_in_codon>C</font>TG)&nbsp;	narX	narX	<i>narX</i>&nbsp;&larr;	sensory histidine kinase in two-component regulatory system with NarL	sensory histidine kinase in two&#8209;component regulatory system with NarL	ECB_01200	snp_nonsynonymous	nonsynonymous	11330
3009	LTEE	Ara-1	50000	REL11330	A	point-mutator	SNP	1278238	1278238	132	1278238	T&rarr;G	<font class=snp_type_nonsynonymous>C44W</font>&nbsp;(TG<font class=mutation_in_codon>T</font>&rarr;TG<font class=mutation_in_codon>G</font>)&nbsp;	narK	narK	<i>narK</i>&nbsp;&rarr;	nitrate/nitrite transporter	nitrate/nitrite transporter	ECB_01201	snp_nonsynonymous	nonsynonymous	11330
3010	LTEE	Ara-1	50000	REL11330	A	point-mutator	SNP	1286699	1286699	intergenic (+23/-160)	1286699	C&rarr;A	intergenic&nbsp;(+23/&#8209;160)	narI,ECB_01206	narI/ECB_01206	<i>narI</i>&nbsp;&rarr;&nbsp;/&nbsp;&rarr;&nbsp;<i>ECB_01206</i>	nitrate reductase 1, gamma (cytochrome b(NR)) subunit/hypothetical protein	nitrate reductase 1, gamma (cytochrome b(NR)) subunit/hypothetical protein	ECB_01205/ECB_01206	snp_intergenic	intergenic	11330
3011	LTEE	Ara-1	50000	REL11330	A	point-mutator	SNP	1290239	1290239	204	1290239	A&rarr;C	<font class=snp_type_nonsynonymous>K68N</font>&nbsp;(AA<font class=mutation_in_codon>A</font>&rarr;AA<font class=mutation_in_codon>C</font>)&nbsp;	hnr	hnr	<i>hnr</i>&nbsp;&rarr;	response regulator of RpoS	response regulator of RpoS	ECB_01211	snp_nonsynonymous	nonsynonymous	11330
3012	LTEE	Ara-1	50000	REL11330	A	point-mutator	SNP	1292879	1292879	intergenic (-163/-441)	1292879	A&rarr;C	intergenic&nbsp;(&#8209;163/&#8209;441)	hns,tdk	hns/tdk	<i>hns</i>&nbsp;&larr;&nbsp;/&nbsp;&rarr;&nbsp;<i>tdk</i>	global DNA-binding transcriptional dual regulator H-NS/thymidine kinase	global DNA&#8209;binding transcriptional dual regulator H&#8209;NS/thymidine kinase	ECB_01213/ECB_01214	snp_intergenic	intergenic	11330
3013	LTEE	Ara-1	50000	REL11330	A	point-mutator	SNP	1298145	1298145	intergenic (+107/-631)	1298145	T&rarr;G	intergenic&nbsp;(+107/&#8209;631)	ychE,oppA	ychE/oppA	<i>ychE</i>&nbsp;&rarr;&nbsp;/&nbsp;&rarr;&nbsp;<i>oppA</i>	predicted inner membrane protein/oligopeptide transporter subunit	predicted inner membrane protein/oligopeptide transporter subunit	ECB_01216/ECB_01217	snp_intergenic	intergenic	11330
3014	LTEE	Ara-1	50000	REL11330	A	point-mutator	SNP	1300941	1300941	449	1300941	T&rarr;G	<font class=snp_type_nonsense>L150*</font>&nbsp;(T<font class=mutation_in_codon>T</font>A&rarr;T<font class=mutation_in_codon>G</font>A)&nbsp;	oppB	oppB	<i>oppB</i>&nbsp;&rarr;	oligopeptide permease ABC transporter membrane protein	oligopeptide permease ABC transporter membrane protein	ECB_01218	snp_nonsense	nonsense	11330
3015	LTEE	Ara-1	50000	REL11330	A	point-mutator	SNP	1305994	1305994	246	1305994	A&rarr;C	<font class=snp_type_synonymous>L82L</font>&nbsp;(CT<font class=mutation_in_codon>T</font>&rarr;CT<font class=mutation_in_codon>G</font>)&nbsp;	cls	cls	<i>cls</i>&nbsp;&larr;	cardiolipin synthetase	cardiolipin synthetase	ECB_01223	snp_synonymous	synonymous	11330
3016	LTEE	Ara-1	50000	REL11330	A	point-mutator	SNP	1308543	1308543	intergenic (-84/-140)	1308543	T&rarr;G	intergenic&nbsp;(&#8209;84/&#8209;140)	yciI,tonB	yciI/tonB	<i>yciI</i>&nbsp;&larr;&nbsp;/&nbsp;&rarr;&nbsp;<i>tonB</i>	predicted enzyme/membrane spanning protein in TonB-ExbB-ExbD complex	predicted enzyme/membrane spanning protein in TonB&#8209;ExbB&#8209;ExbD complex	ECB_01225/ECB_01226	snp_intergenic	intergenic	11330
3017	LTEE	Ara-1	50000	REL11330	A	point-mutator	SNP	1310805	1310805	453	1310805	T&rarr;G	<font class=snp_type_synonymous>G151G</font>&nbsp;(GG<font class=mutation_in_codon>A</font>&rarr;GG<font class=mutation_in_codon>C</font>)&nbsp;	yciC	yciC	<i>yciC</i>&nbsp;&larr;	hypothetical protein	hypothetical protein	ECB_01229	snp_synonymous	synonymous	11330
3018	LTEE	Ara-1	50000	REL11330	A	point-mutator	SNP	1319860	1319860	681	1319860	T&rarr;G	<font class=snp_type_synonymous>P227P</font>&nbsp;(CC<font class=mutation_in_codon>A</font>&rarr;CC<font class=mutation_in_codon>C</font>)&nbsp;	trpE	trpE	<i>trpE</i>&nbsp;&larr;	anthranilate synthase component I	anthranilate synthase component I	ECB_01238	snp_synonymous	synonymous	11330
3019	LTEE	Ara-1	50000	REL11330	A	point-mutator	SNP	1320730	1320730	intergenic (-54/-84)	1320730	A&rarr;C	intergenic&nbsp;(&#8209;54/&#8209;84)	trpL,yciV	trpL/yciV	<i>trpL</i>&nbsp;&larr;&nbsp;/&nbsp;&rarr;&nbsp;<i>yciV</i>	trp operon leader peptide/hypothetical protein	trp operon leader peptide/hypothetical protein	ECB_01239/ECB_01240	snp_intergenic	intergenic	11330
3020	LTEE	Ara-1	50000	REL11330	A	point-mutator	SNP	1329516	1329516	97	1329516	C&rarr;T	<font class=snp_type_nonsynonymous>H33Y</font>&nbsp;(<font class=mutation_in_codon>C</font>AC&rarr;<font class=mutation_in_codon>T</font>AC)&nbsp;	topA	topA	<i>topA</i>&nbsp;&rarr;	DNA topoisomerase I	DNA topoisomerase I	ECB_01250	snp_nonsynonymous	nonsynonymous	11330
3021	LTEE	Ara-1	50000	REL11330	A	point-mutator	SNP	1329567	1329567	148	1329567	T&rarr;G	<font class=snp_type_nonsynonymous>S50A</font>&nbsp;(<font class=mutation_in_codon>T</font>CT&rarr;<font class=mutation_in_codon>G</font>CT)&nbsp;	topA	topA	<i>topA</i>&nbsp;&rarr;	DNA topoisomerase I	DNA topoisomerase I	ECB_01250	snp_nonsynonymous	nonsynonymous	11330
3022	LTEE	Ara-1	50000	REL11330	A	point-mutator	SNP	1331374	1331374	1955	1331374	A&rarr;C	<font class=snp_type_nonsynonymous>E652A</font>&nbsp;(G<font class=mutation_in_codon>A</font>A&rarr;G<font class=mutation_in_codon>C</font>A)&nbsp;	topA	topA	<i>topA</i>&nbsp;&rarr;	DNA topoisomerase I	DNA topoisomerase I	ECB_01250	snp_nonsynonymous	nonsynonymous	11330
3023	LTEE	Ara-1	50000	REL11330	A	point-mutator	SNP	1332725	1332725	499	1332725	A&rarr;C	<font class=snp_type_nonsynonymous>N167H</font>&nbsp;(<font class=mutation_in_codon>A</font>AT&rarr;<font class=mutation_in_codon>C</font>AT)&nbsp;	cysB	cysB	<i>cysB</i>&nbsp;&rarr;	DNA-binding transcriptional dual regulator, O-acetyl-L-serine-binding	DNA&#8209;binding transcriptional dual regulator, O&#8209;acetyl&#8209;L&#8209;serine&#8209;binding	ECB_01251	snp_nonsynonymous	nonsynonymous	11330
3024	LTEE	Ara-1	50000	REL11330	A	point-mutator	SNP	1337966	1337966	265	1337966	G&rarr;T	<font class=snp_type_nonsense>G89*</font>&nbsp;(<font class=mutation_in_codon>G</font>GA&rarr;<font class=mutation_in_codon>T</font>GA)&nbsp;	pgpB	pgpB	<i>pgpB</i>&nbsp;&rarr;	phosphatidylglycerophosphatase B	phosphatidylglycerophosphatase B	ECB_01255	snp_nonsense	nonsense	11330
3025	LTEE	Ara-1	50000	REL11330	A	point-mutator	SNP	1340917	1340917	626	1340917	A&rarr;C	<font class=snp_type_nonsynonymous>Q209P</font>&nbsp;(C<font class=mutation_in_codon>A</font>G&rarr;C<font class=mutation_in_codon>C</font>G)&nbsp;	pyrF	pyrF	<i>pyrF</i>&nbsp;&rarr;	orotidine 5'-phosphate decarboxylase	orotidine 5'&#8209;phosphate decarboxylase	ECB_01258	snp_nonsynonymous	nonsynonymous	11330
3026	LTEE	Ara-1	50000	REL11330	A	point-mutator	SNP	1344571	1344571	542	1344571	T&rarr;G	<font class=snp_type_nonsynonymous>N181T</font>&nbsp;(A<font class=mutation_in_codon>A</font>T&rarr;A<font class=mutation_in_codon>C</font>T)&nbsp;	yciR	yciR	<i>yciR</i>&nbsp;&larr;	modulator of Rnase II stability	modulator of Rnase II stability	ECB_01262	snp_nonsynonymous	nonsynonymous	11330
3027	LTEE	Ara-1	50000	REL11330	A	point-mutator	SNP	1349290	1349290	119	1349290	T&rarr;G	<font class=snp_type_nonsynonymous>Q40P</font>&nbsp;(C<font class=mutation_in_codon>A</font>G&rarr;C<font class=mutation_in_codon>C</font>G)&nbsp;	fabI	fabI	<i>fabI</i>&nbsp;&larr;	enoyl-(acyl carrier protein) reductase	enoyl&#8209;(acyl carrier protein) reductase	ECB_01265	snp_nonsynonymous	nonsynonymous	11330
3028	LTEE	Ara-1	50000	REL11330	A	point-mutator	SNP	1355298	1355298	182	1355298	A&rarr;C	<font class=snp_type_nonsynonymous>L61R</font>&nbsp;(C<font class=mutation_in_codon>T</font>T&rarr;C<font class=mutation_in_codon>G</font>T)&nbsp;	sapA	sapA	<i>sapA</i>&nbsp;&larr;	predicted antimicrobial peptide transporter subunit	predicted antimicrobial peptide transporter subunit	ECB_01271	snp_nonsynonymous	nonsynonymous	11330
3029	LTEE	Ara-1	50000	REL11330	A	point-mutator	SNP	1359430	1359430	intergenic (-154/-58)	1359430	T&rarr;G	intergenic&nbsp;(&#8209;154/&#8209;58)	ycjK,ycjL	ycjK/ycjL	<i>ycjK</i>&nbsp;&larr;&nbsp;/&nbsp;&rarr;&nbsp;<i>ycjL</i>	gamma-Glu-putrescine synthase/gamma-Glu-GABA hydrolase	gamma&#8209;Glu&#8209;putrescine synthase/gamma&#8209;Glu&#8209;GABA hydrolase	ECB_01274/ECB_01275	snp_intergenic	intergenic	11330
3030	LTEE	Ara-1	50000	REL11330	A	point-mutator	SNP	1359652	1359652	165	1359652	T&rarr;G	<font class=snp_type_synonymous>L55L</font>&nbsp;(CT<font class=mutation_in_codon>T</font>&rarr;CT<font class=mutation_in_codon>G</font>)&nbsp;	ycjL	ycjL	<i>ycjL</i>&nbsp;&rarr;	gamma-Glu-GABA hydrolase	gamma&#8209;Glu&#8209;GABA hydrolase	ECB_01275	snp_synonymous	synonymous	11330
3031	LTEE	Ara-1	50000	REL11330	A	point-mutator	SNP	1360208	1360208	721	1360208	A&rarr;C	<font class=snp_type_nonsynonymous>I241L</font>&nbsp;(<font class=mutation_in_codon>A</font>TC&rarr;<font class=mutation_in_codon>C</font>TC)&nbsp;	ycjL	ycjL	<i>ycjL</i>&nbsp;&rarr;	gamma-Glu-GABA hydrolase	gamma&#8209;Glu&#8209;GABA hydrolase	ECB_01275	snp_nonsynonymous	nonsynonymous	11330
3032	LTEE	Ara-1	50000	REL11330	A	point-mutator	SNP	1364039	1364039	122	1364039	A&rarr;C	<font class=snp_type_nonsynonymous>E41A</font>&nbsp;(G<font class=mutation_in_codon>A</font>G&rarr;G<font class=mutation_in_codon>C</font>G)&nbsp;	goaG	goaG	<i>goaG</i>&nbsp;&rarr;	GABA aminotransferase, PLP-dependent	GABA aminotransferase, PLP&#8209;dependent	ECB_01279	snp_nonsynonymous	nonsynonymous	11330
3033	LTEE	Ara-1	50000	REL11330	A	point-mutator	SNP	1364451	1364451	534	1364451	A&rarr;C	<font class=snp_type_synonymous>S178S</font>&nbsp;(TC<font class=mutation_in_codon>A</font>&rarr;TC<font class=mutation_in_codon>C</font>)&nbsp;	goaG	goaG	<i>goaG</i>&nbsp;&rarr;	GABA aminotransferase, PLP-dependent	GABA aminotransferase, PLP&#8209;dependent	ECB_01279	snp_synonymous	synonymous	11330
3034	LTEE	Ara-1	50000	REL11330	A	point-mutator	SNP	1378904	1378904	389	1378904	T&rarr;G	<font class=snp_type_nonsynonymous>L130R</font>&nbsp;(C<font class=mutation_in_codon>T</font>G&rarr;C<font class=mutation_in_codon>G</font>G)&nbsp;	ycjU	ycjU	<i>ycjU</i>&nbsp;&rarr;	predicted beta-phosphoglucomutase	predicted beta&#8209;phosphoglucomutase	ECB_01294	snp_nonsynonymous	nonsynonymous	11330
3035	LTEE	Ara-1	50000	REL11330	A	point-mutator	SNP	1379667	1379667	479	1379667	A&rarr;C	<font class=snp_type_nonsynonymous>E160A</font>&nbsp;(G<font class=mutation_in_codon>A</font>A&rarr;G<font class=mutation_in_codon>C</font>A)&nbsp;	ycjV	ycjV	<i>ycjV</i>&nbsp;&rarr;	putative sugar transport protein	putative sugar transport protein	ECB_01295	snp_nonsynonymous	nonsynonymous	11330
3036	LTEE	Ara-1	50000	REL11330	A	point-mutator	SNP	1380965	1380965	650	1380965	A&rarr;C	<font class=snp_type_nonsynonymous>Y217S</font>&nbsp;(T<font class=mutation_in_codon>A</font>T&rarr;T<font class=mutation_in_codon>C</font>T)&nbsp;	ompG	ompG	<i>ompG</i>&nbsp;&rarr;	outer membrane porin	outer membrane porin	ECB_01296	snp_nonsynonymous	nonsynonymous	11330
3037	LTEE	Ara-1	50000	REL11330	A	point-mutator	SNP	1390364	1390364	5	1390364	A&rarr;C	<font class=snp_type_nonsynonymous>K2T</font>&nbsp;(A<font class=mutation_in_codon>A</font>G&rarr;A<font class=mutation_in_codon>C</font>G)&nbsp;	ycjZ	ycjZ	<i>ycjZ</i>&nbsp;&rarr;	predicted DNA-binding transcriptional regulator	predicted DNA&#8209;binding transcriptional regulator	ECB_01306	snp_nonsynonymous	nonsynonymous	11330
3038	LTEE	Ara-1	50000	REL11330	A	point-mutator	SNP	1390431	1390431	72	1390431	A&rarr;C	<font class=snp_type_synonymous>A24A</font>&nbsp;(GC<font class=mutation_in_codon>A</font>&rarr;GC<font class=mutation_in_codon>C</font>)&nbsp;	ycjZ	ycjZ	<i>ycjZ</i>&nbsp;&rarr;	predicted DNA-binding transcriptional regulator	predicted DNA&#8209;binding transcriptional regulator	ECB_01306	snp_synonymous	synonymous	11330
3039	LTEE	Ara-1	50000	REL11330	A	point-mutator	SNP	1391019	1391019	660	1391019	A&rarr;C	<font class=snp_type_nonsynonymous>E220D</font>&nbsp;(GA<font class=mutation_in_codon>A</font>&rarr;GA<font class=mutation_in_codon>C</font>)&nbsp;	ycjZ	ycjZ	<i>ycjZ</i>&nbsp;&rarr;	predicted DNA-binding transcriptional regulator	predicted DNA&#8209;binding transcriptional regulator	ECB_01306	snp_nonsynonymous	nonsynonymous	11330
3040	LTEE	Ara-1	50000	REL11330	A	point-mutator	SNP	1392392	1392392	797	1392392	A&rarr;C	<font class=snp_type_nonsynonymous>E266A</font>&nbsp;(G<font class=mutation_in_codon>A</font>A&rarr;G<font class=mutation_in_codon>C</font>A)&nbsp;	mppA	mppA	<i>mppA</i>&nbsp;&rarr;	murein tripeptide (L-ala-gamma-D-glutamyl-meso-DAP) transporter subunit	murein tripeptide (L&#8209;ala&#8209;gamma&#8209;D&#8209;glutamyl&#8209;meso&#8209;DAP) transporter subunit	ECB_01307	snp_nonsynonymous	nonsynonymous	11330
3041	LTEE	Ara-1	50000	REL11330	A	point-mutator	AMP	1392797	1393024	coding (1202-1429/1614 nt)	1392797	228&nbsp;bp&nbsp;x&nbsp;2	duplication	mppA	mppA	<i>mppA</i>&nbsp;&rarr;	murein tripeptide (L-ala-gamma-D-glutamyl-meso-DAP) transporter subunit	murein tripeptide (L&#8209;ala&#8209;gamma&#8209;D&#8209;glutamyl&#8209;meso&#8209;DAP) transporter subunit	ECB_01307	large_amplification	not_snp	11330
3042	LTEE	Ara-1	50000	REL11330	A	point-mutator	SNP	1394215	1394215	77	1394215	A&rarr;C	<font class=snp_type_nonsynonymous>M26R</font>&nbsp;(A<font class=mutation_in_codon>T</font>G&rarr;A<font class=mutation_in_codon>G</font>G)&nbsp;	ynaI	ynaI	<i>ynaI</i>&nbsp;&larr;	conserved inner membrane protein	conserved inner membrane protein	ECB_01308	snp_nonsynonymous	nonsynonymous	11330
3043	LTEE	Ara-1	50000	REL11330	A	point-mutator	SNP	1394855	1394855	938	1394855	T&rarr;G	<font class=snp_type_nonsynonymous>E313A</font>&nbsp;(G<font class=mutation_in_codon>A</font>A&rarr;G<font class=mutation_in_codon>C</font>A)&nbsp;	ydaA	ydaA	<i>ydaA</i>&nbsp;&larr;	stress-induced protein	stress&#8209;induced protein	ECB_01310	snp_nonsynonymous	nonsynonymous	11330
3044	LTEE	Ara-1	50000	REL11330	A	point-mutator	SNP	1395417	1395417	376	1395417	T&rarr;G	<font class=snp_type_nonsynonymous>I126L</font>&nbsp;(<font class=mutation_in_codon>A</font>TT&rarr;<font class=mutation_in_codon>C</font>TT)&nbsp;	ydaA	ydaA	<i>ydaA</i>&nbsp;&larr;	stress-induced protein	stress&#8209;induced protein	ECB_01310	snp_nonsynonymous	nonsynonymous	11330
3045	LTEE	Ara-1	50000	REL11330	A	point-mutator	SNP	1397197	1397197	210	1397197	A&rarr;C	<font class=snp_type_nonsynonymous>F70L</font>&nbsp;(TT<font class=mutation_in_codon>T</font>&rarr;TT<font class=mutation_in_codon>G</font>)&nbsp;	ogt	ogt	<i>ogt</i>&nbsp;&larr;	O-6-alkylguanine-DNA:cysteine-protein methyltransferase	O&#8209;6&#8209;alkylguanine&#8209;DNA:cysteine&#8209;protein methyltransferase	ECB_01312	snp_nonsynonymous	nonsynonymous	11330
3046	LTEE	Ara-1	50000	REL11330	A	point-mutator	SNP	1399534	1399534	892	1399534	A&rarr;C	<font class=snp_type_nonsynonymous>S298A</font>&nbsp;(<font class=mutation_in_codon>T</font>CC&rarr;<font class=mutation_in_codon>G</font>CC)&nbsp;	abgB	abgB	<i>abgB</i>&nbsp;&larr;	predicted peptidase, aminobenzoyl-glutamate utilization protein	predicted peptidase, aminobenzoyl&#8209;glutamate utilization protein	ECB_01314	snp_nonsynonymous	nonsynonymous	11330
3047	LTEE	Ara-1	50000	REL11330	A	point-mutator	SNP	1405097	1405097	intergenic (-132/-123)	1405097	T&rarr;G	intergenic&nbsp;(&#8209;132/&#8209;123)	ydaM,ydaN	ydaM/ydaN	<i>ydaM</i>&nbsp;&larr;&nbsp;/&nbsp;&rarr;&nbsp;<i>ydaN</i>	predicted diguanylate cyclase, GGDEF domain signalling protein/zinc transporter	predicted diguanylate cyclase, GGDEF domain signalling protein/zinc transporter	ECB_01318/ECB_01319	snp_intergenic	intergenic	11330
3048	LTEE	Ara-1	50000	REL11330	A	point-mutator	SNP	1411992	1411992	2565	1411992	T&rarr;G	<font class=snp_type_synonymous>S855S</font>&nbsp;(TC<font class=mutation_in_codon>A</font>&rarr;TC<font class=mutation_in_codon>C</font>)&nbsp;	recE	recE	<i>recE</i>&nbsp;&larr;	exonuclease VIII, 5' -> 3' specific dsDNA exonuclease	exonuclease VIII, 5' &#8209;> 3' specific dsDNA exonuclease	ECB_01327	snp_synonymous	synonymous	11330
3049	LTEE	Ara-1	50000	REL11330	A	point-mutator	SNP	1412217	1412217	2340	1412217	A&rarr;C	<font class=snp_type_synonymous>V780V</font>&nbsp;(GT<font class=mutation_in_codon>T</font>&rarr;GT<font class=mutation_in_codon>G</font>)&nbsp;	recE	recE	<i>recE</i>&nbsp;&larr;	exonuclease VIII, 5' -> 3' specific dsDNA exonuclease	exonuclease VIII, 5' &#8209;> 3' specific dsDNA exonuclease	ECB_01327	snp_synonymous	synonymous	11330
3050	LTEE	Ara-1	50000	REL11330	A	point-mutator	SNP	1413851	1413851	706	1413851	T&rarr;G	<font class=snp_type_nonsynonymous>I236L</font>&nbsp;(<font class=mutation_in_codon>A</font>TC&rarr;<font class=mutation_in_codon>C</font>TC)&nbsp;	recE	recE	<i>recE</i>&nbsp;&larr;	exonuclease VIII, 5' -> 3' specific dsDNA exonuclease	exonuclease VIII, 5' &#8209;> 3' specific dsDNA exonuclease	ECB_01327	snp_nonsynonymous	nonsynonymous	11330
3051	LTEE	Ara-1	50000	REL11330	A	point-mutator	SNP	1413982	1413982	575	1413982	T&rarr;G	<font class=snp_type_nonsynonymous>K192T</font>&nbsp;(A<font class=mutation_in_codon>A</font>A&rarr;A<font class=mutation_in_codon>C</font>A)&nbsp;	recE	recE	<i>recE</i>&nbsp;&larr;	exonuclease VIII, 5' -> 3' specific dsDNA exonuclease	exonuclease VIII, 5' &#8209;> 3' specific dsDNA exonuclease	ECB_01327	snp_nonsynonymous	nonsynonymous	11330
3052	LTEE	Ara-1	50000	REL11330	A	point-mutator	SNP	1417576	1417576	47	1417576	T&rarr;G	<font class=snp_type_nonsynonymous>L16R</font>&nbsp;(C<font class=mutation_in_codon>T</font>G&rarr;C<font class=mutation_in_codon>G</font>G)&nbsp;	ydfQ	ydfQ	<i>ydfQ</i>&nbsp;&rarr;	predicted lysozyme	predicted lysozyme	ECB_01337	snp_nonsynonymous	nonsynonymous	11330
3053	LTEE	Ara-1	50000	REL11330	A	point-mutator	SNP	1421493	1421493	773	1421493	T&rarr;G	<font class=snp_type_nonsynonymous>F258C</font>&nbsp;(T<font class=mutation_in_codon>T</font>T&rarr;T<font class=mutation_in_codon>G</font>T)&nbsp;	ECB_01341	ECB_01341	<i>ECB_01341</i>&nbsp;&rarr;	hypothetical protein	hypothetical protein	ECB_01341	snp_nonsynonymous	nonsynonymous	11330
3054	LTEE	Ara-1	50000	REL11330	A	point-mutator	SNP	1424186	1424186	18	1424186	A&rarr;C	<font class=snp_type_nonsynonymous>L6F</font>&nbsp;(TT<font class=mutation_in_codon>A</font>&rarr;TT<font class=mutation_in_codon>C</font>)&nbsp;	ECB_01344	ECB_01344	<i>ECB_01344</i>&nbsp;&rarr;	conserved hypothetical protein	conserved hypothetical protein	ECB_01344	snp_nonsynonymous	nonsynonymous	11330
3055	LTEE	Ara-1	50000	REL11330	A	point-mutator	SNP	1429420	1429420	2971	1429420	T&rarr;G	<font class=snp_type_nonsynonymous>T991P</font>&nbsp;(<font class=mutation_in_codon>A</font>CG&rarr;<font class=mutation_in_codon>C</font>CG)&nbsp;	ydbK	ydbK	<i>ydbK</i>&nbsp;&larr;	fused predicted pyruvate-flavodoxin oxidoreductase: conserved protein/conserved protein/FeS binding protein	fused predicted pyruvate&#8209;flavodoxin oxidoreductase: conserved protein/conserved protein/FeS binding protein	ECB_01349	snp_nonsynonymous	nonsynonymous	11330
3056	LTEE	Ara-1	50000	REL11330	A	point-mutator	SNP	1446528	1446528	2051	1446528	T&rarr;G	<font class=snp_type_nonsynonymous>F684C</font>&nbsp;(T<font class=mutation_in_codon>T</font>C&rarr;T<font class=mutation_in_codon>G</font>C)&nbsp;	ydbD	ydbD	<i>ydbD</i>&nbsp;&rarr;	hypothetical protein	hypothetical protein	ECB_01362	snp_nonsynonymous	nonsynonymous	11330
3057	LTEE	Ara-1	50000	REL11330	A	point-mutator	SNP	1447783	1447783	224	1447783	A&rarr;C	<font class=snp_type_nonsynonymous>Y75S</font>&nbsp;(T<font class=mutation_in_codon>A</font>T&rarr;T<font class=mutation_in_codon>C</font>T)&nbsp;	ynbB	ynbB	<i>ynbB</i>&nbsp;&rarr;	predicted CDP-diglyceride synthase	predicted CDP&#8209;diglyceride synthase	ECB_01364	snp_nonsynonymous	nonsynonymous	11330
3058	LTEE	Ara-1	50000	REL11330	A	point-mutator	SNP	1452976	1452976	528	1452976	T&rarr;G	<font class=snp_type_nonsynonymous>I176M</font>&nbsp;(AT<font class=mutation_in_codon>T</font>&rarr;AT<font class=mutation_in_codon>G</font>)&nbsp;	hrpA	hrpA	<i>hrpA</i>&nbsp;&rarr;	ATP-dependent helicase	ATP&#8209;dependent helicase	ECB_01368	snp_nonsynonymous	nonsynonymous	11330
3059	LTEE	Ara-1	50000	REL11330	A	point-mutator	SNP	1453041	1453041	593	1453041	T&rarr;G	<font class=snp_type_nonsynonymous>L198R</font>&nbsp;(C<font class=mutation_in_codon>T</font>G&rarr;C<font class=mutation_in_codon>G</font>G)&nbsp;	hrpA	hrpA	<i>hrpA</i>&nbsp;&rarr;	ATP-dependent helicase	ATP&#8209;dependent helicase	ECB_01368	snp_nonsynonymous	nonsynonymous	11330
3060	LTEE	Ara-1	50000	REL11330	A	point-mutator	SNP	1456319	1456319	intergenic (+25/-247)	1456319	A&rarr;C	intergenic&nbsp;(+25/&#8209;247)	hrpA,ydcF	hrpA/ydcF	<i>hrpA</i>&nbsp;&rarr;&nbsp;/&nbsp;&rarr;&nbsp;<i>ydcF</i>	ATP-dependent helicase/hypothetical protein	ATP&#8209;dependent helicase/hypothetical protein	ECB_01368/ECB_01369	snp_intergenic	intergenic	11330
3061	LTEE	Ara-1	50000	REL11330	A	point-mutator	SNP	1459135	1459135	911	1459135	A&rarr;C	<font class=snp_type_nonsense>L304*</font>&nbsp;(T<font class=mutation_in_codon>T</font>A&rarr;T<font class=mutation_in_codon>G</font>A)&nbsp;	gapC	gapC	<i>gapC</i>&nbsp;&larr;	glyceraldehyde-3-phosphate dehydrogenase	glyceraldehyde&#8209;3&#8209;phosphate dehydrogenase	ECB_01371	snp_nonsense	nonsense	11330
3062	LTEE	Ara-1	50000	REL11330	A	point-mutator	SNP	1476493	1476493	212	1476493	A&rarr;C	<font class=snp_type_nonsynonymous>Q71P</font>&nbsp;(C<font class=mutation_in_codon>A</font>G&rarr;C<font class=mutation_in_codon>C</font>G)&nbsp;	ydcN	ydcN	<i>ydcN</i>&nbsp;&rarr;	predicted DNA-binding transcriptional regulator	predicted DNA&#8209;binding transcriptional regulator	ECB_01392	snp_nonsynonymous	nonsynonymous	11330
3063	LTEE	Ara-1	50000	REL11330	A	point-mutator	SNP	1476673	1476673	392	1476673	A&rarr;C	<font class=snp_type_nonsynonymous>Q131P</font>&nbsp;(C<font class=mutation_in_codon>A</font>A&rarr;C<font class=mutation_in_codon>C</font>A)&nbsp;	ydcN	ydcN	<i>ydcN</i>&nbsp;&rarr;	predicted DNA-binding transcriptional regulator	predicted DNA&#8209;binding transcriptional regulator	ECB_01392	snp_nonsynonymous	nonsynonymous	11330
3064	LTEE	Ara-1	50000	REL11330	A	point-mutator	SNP	1498880	1498880	797	1498880	A&rarr;C	<font class=snp_type_nonsynonymous>Y266S</font>&nbsp;(T<font class=mutation_in_codon>A</font>C&rarr;T<font class=mutation_in_codon>C</font>C)&nbsp;	ECB_01413	ECB_01413	<i>ECB_01413</i>&nbsp;&rarr;	conserved hypothetical protein	conserved hypothetical protein	ECB_01413	snp_nonsynonymous	nonsynonymous	11330
3065	LTEE	Ara-1	50000	REL11330	A	point-mutator	SNP	1509892	1509892	pseudogene (118/567 nt)	1509892	G&rarr;T	pseudogene&nbsp;(118/567&nbsp;nt)	yddE	yddE	<i>yddE</i>&nbsp;&larr;	hypothetical protein; b1464_2	hypothetical protein; b1464_2	ECB_01422	snp_pseudogene	pseudogene	11330
3066	LTEE	Ara-1	50000	REL11330	A	point-mutator	SNP	1513007	1513007	3735	1513007	T&rarr;G	<font class=snp_type_nonsynonymous>K1245N</font>&nbsp;(AA<font class=mutation_in_codon>A</font>&rarr;AA<font class=mutation_in_codon>C</font>)&nbsp;	narZ	narZ	<i>narZ</i>&nbsp;&larr;	nitrate reductase 2 (NRZ), alpha subunit	nitrate reductase 2 (NRZ), alpha subunit	ECB_01426	snp_nonsynonymous	nonsynonymous	11330
3067	LTEE	Ara-1	50000	REL11330	A	point-mutator	SNP	1513411	1513411	3331	1513411	A&rarr;C	<font class=snp_type_nonsynonymous>S1111A</font>&nbsp;(<font class=mutation_in_codon>T</font>CT&rarr;<font class=mutation_in_codon>G</font>CT)&nbsp;	narZ	narZ	<i>narZ</i>&nbsp;&larr;	nitrate reductase 2 (NRZ), alpha subunit	nitrate reductase 2 (NRZ), alpha subunit	ECB_01426	snp_nonsynonymous	nonsynonymous	11330
3068	LTEE	Ara-1	50000	REL11330	A	point-mutator	SNP	1517279	1517279	933	1517279	A&rarr;C	<font class=snp_type_nonsynonymous>D311E</font>&nbsp;(GA<font class=mutation_in_codon>T</font>&rarr;GA<font class=mutation_in_codon>G</font>)&nbsp;	narU	narU	<i>narU</i>&nbsp;&larr;	nitrate/nitrite transporter	nitrate/nitrite transporter	ECB_01427	snp_nonsynonymous	nonsynonymous	11330
3069	LTEE	Ara-1	50000	REL11330	A	point-mutator	SNP	1520271	1520271	intergenic (-92/+167)	1520271	A&rarr;C	intergenic&nbsp;(&#8209;92/+167)	yddL,yddG	yddL/yddG	<i>yddL</i>&nbsp;&larr;&nbsp;/&nbsp;&larr;&nbsp;<i>yddG</i>	predicted lipoprotein/predicted methyl viologen efflux pump	predicted lipoprotein/predicted methyl viologen efflux pump	ECB_01430/ECB_01431	snp_intergenic	intergenic	11330
3070	LTEE	Ara-1	50000	REL11330	A	point-mutator	SNP	1520715	1520715	548	1520715	A&rarr;C	<font class=snp_type_nonsynonymous>F183C</font>&nbsp;(T<font class=mutation_in_codon>T</font>T&rarr;T<font class=mutation_in_codon>G</font>T)&nbsp;	yddG	yddG	<i>yddG</i>&nbsp;&larr;	predicted methyl viologen efflux pump	predicted methyl viologen efflux pump	ECB_01431	snp_nonsynonymous	nonsynonymous	11330
3071	LTEE	Ara-1	50000	REL11330	A	point-mutator	SNP	1525072	1525072	462	1525072	T&rarr;G	<font class=snp_type_nonsynonymous>D154E</font>&nbsp;(GA<font class=mutation_in_codon>T</font>&rarr;GA<font class=mutation_in_codon>G</font>)&nbsp;	fdnH	fdnH	<i>fdnH</i>&nbsp;&rarr;	formate dehydrogenase-N, Fe-S (beta) subunit, nitrate-inducible	formate dehydrogenase&#8209;N, Fe&#8209;S (beta) subunit, nitrate&#8209;inducible	ECB_01433	snp_nonsynonymous	nonsynonymous	11330
3072	LTEE	Ara-1	50000	REL11330	A	point-mutator	SNP	1538177	1538177	1495	1538177	A&rarr;C	<font class=snp_type_nonsynonymous>Y499D</font>&nbsp;(<font class=mutation_in_codon>T</font>AC&rarr;<font class=mutation_in_codon>G</font>AC)&nbsp;	dos	dos	<i>dos</i>&nbsp;&larr;	cAMP phosphodiesterase, heme-regulated	cAMP phosphodiesterase, heme&#8209;regulated	ECB_01447	snp_nonsynonymous	nonsynonymous	11330
3073	LTEE	Ara-1	50000	REL11330	A	point-mutator	SNP	1538251	1538251	1421	1538251	A&rarr;C	<font class=snp_type_nonsynonymous>L474R</font>&nbsp;(C<font class=mutation_in_codon>T</font>A&rarr;C<font class=mutation_in_codon>G</font>A)&nbsp;	dos	dos	<i>dos</i>&nbsp;&larr;	cAMP phosphodiesterase, heme-regulated	cAMP phosphodiesterase, heme&#8209;regulated	ECB_01447	snp_nonsynonymous	nonsynonymous	11330
3074	LTEE	Ara-1	50000	REL11330	A	point-mutator	SNP	1538945	1538945	727	1538945	T&rarr;G	<font class=snp_type_nonsynonymous>M243L</font>&nbsp;(<font class=mutation_in_codon>A</font>TG&rarr;<font class=mutation_in_codon>C</font>TG)&nbsp;	dos	dos	<i>dos</i>&nbsp;&larr;	cAMP phosphodiesterase, heme-regulated	cAMP phosphodiesterase, heme&#8209;regulated	ECB_01447	snp_nonsynonymous	nonsynonymous	11330
3075	LTEE	Ara-1	50000	REL11330	A	point-mutator	SNP	1539153	1539153	519	1539153	A&rarr;C	<font class=snp_type_nonsynonymous>I173M</font>&nbsp;(AT<font class=mutation_in_codon>T</font>&rarr;AT<font class=mutation_in_codon>G</font>)&nbsp;	dos	dos	<i>dos</i>&nbsp;&larr;	cAMP phosphodiesterase, heme-regulated	cAMP phosphodiesterase, heme&#8209;regulated	ECB_01447	snp_nonsynonymous	nonsynonymous	11330
3076	LTEE	Ara-1	50000	REL11330	A	point-mutator	SNP	1543641	1543641	800	1543641	A&rarr;C	<font class=snp_type_nonsynonymous>L267R</font>&nbsp;(C<font class=mutation_in_codon>T</font>C&rarr;C<font class=mutation_in_codon>G</font>C)&nbsp;	xasA	xasA	<i>xasA</i>&nbsp;&larr;	predicted glutamate:gamma-aminobutyric acid antiporter	predicted glutamate:gamma&#8209;aminobutyric acid antiporter	ECB_01450	snp_nonsynonymous	nonsynonymous	11330
3077	LTEE	Ara-1	50000	REL11330	A	point-mutator	SNP	1544321	1544321	120	1544321	A&rarr;C	<font class=snp_type_nonsynonymous>F40L</font>&nbsp;(TT<font class=mutation_in_codon>T</font>&rarr;TT<font class=mutation_in_codon>G</font>)&nbsp;	xasA	xasA	<i>xasA</i>&nbsp;&larr;	predicted glutamate:gamma-aminobutyric acid antiporter	predicted glutamate:gamma&#8209;aminobutyric acid antiporter	ECB_01450	snp_nonsynonymous	nonsynonymous	11330
3078	LTEE	Ara-1	50000	REL11330	A	point-mutator	SNP	1550111	1550111	1460	1550111	A&rarr;C	<font class=snp_type_nonsynonymous>F487C</font>&nbsp;(T<font class=mutation_in_codon>T</font>T&rarr;T<font class=mutation_in_codon>G</font>T)&nbsp;	yddB	yddB	<i>yddB</i>&nbsp;&larr;	predicted porin protein	predicted porin protein	ECB_01453	snp_nonsynonymous	nonsynonymous	11330
3079	LTEE	Ara-1	50000	REL11330	A	point-mutator	SNP	1555329	1555329	1147	1555329	T&rarr;G	<font class=snp_type_nonsynonymous>K383Q</font>&nbsp;(<font class=mutation_in_codon>A</font>AA&rarr;<font class=mutation_in_codon>C</font>AA)&nbsp;	ydeN	ydeN	<i>ydeN</i>&nbsp;&larr;	hypothetical protein	hypothetical protein	ECB_01456	snp_nonsynonymous	nonsynonymous	11330
3080	LTEE	Ara-1	50000	REL11330	A	point-mutator	SNP	1560443	1560443	intergenic (-6/+328)	1560443	T&rarr;G	intergenic&nbsp;(&#8209;6/+328)	ydeP,ydeQ	ydeP/ydeQ	<i>ydeP</i>&nbsp;&larr;&nbsp;/&nbsp;&larr;&nbsp;<i>ydeQ</i>	predicted oxidoreductase/predicted fimbrial-like adhesin protein	predicted oxidoreductase/predicted fimbrial&#8209;like adhesin protein	ECB_01459/ECB_01460	snp_intergenic	intergenic	11330
3081	LTEE	Ara-1	50000	REL11330	A	point-mutator	SNP	1561452	1561452	234	1561452	A&rarr;C	<font class=snp_type_nonsynonymous>H78Q</font>&nbsp;(CA<font class=mutation_in_codon>T</font>&rarr;CA<font class=mutation_in_codon>G</font>)&nbsp;	ydeQ	ydeQ	<i>ydeQ</i>&nbsp;&larr;	predicted fimbrial-like adhesin protein	predicted fimbrial&#8209;like adhesin protein	ECB_01460	snp_nonsynonymous	nonsynonymous	11330
3082	LTEE	Ara-1	50000	REL11330	A	point-mutator	SNP	1563306	1563306	647	1563306	T&rarr;G	<font class=snp_type_nonsynonymous>Q216P</font>&nbsp;(C<font class=mutation_in_codon>A</font>G&rarr;C<font class=mutation_in_codon>C</font>G)&nbsp;	ydeT	ydeT	<i>ydeT</i>&nbsp;&larr;	hypothetical protein	hypothetical protein	ECB_01463	snp_nonsynonymous	nonsynonymous	11330
3083	LTEE	Ara-1	50000	REL11330	A	point-mutator	SNP	1564346	1564346	681	1564346	A&rarr;C	<font class=snp_type_synonymous>V227V</font>&nbsp;(GT<font class=mutation_in_codon>T</font>&rarr;GT<font class=mutation_in_codon>G</font>)&nbsp;	ECB_01464	ECB_01464	<i>ECB_01464</i>&nbsp;&larr;	putative fimbrial usher protein	putative fimbrial usher protein	ECB_01464	snp_synonymous	synonymous	11330
3084	LTEE	Ara-1	50000	REL11330	A	point-mutator	SNP	1567831	1567831	913	1567831	T&rarr;G	<font class=snp_type_nonsynonymous>I305L</font>&nbsp;(<font class=mutation_in_codon>A</font>TT&rarr;<font class=mutation_in_codon>C</font>TT)&nbsp;	hipA	hipA	<i>hipA</i>&nbsp;&larr;	regulator with hipB	regulator with hipB	ECB_01469	snp_nonsynonymous	nonsynonymous	11330
3085	LTEE	Ara-1	50000	REL11330	A	point-mutator	SNP	1569491	1569491	pseudogene (1142/1401 nt)	1569491	T&rarr;G	pseudogene&nbsp;(1142/1401&nbsp;nt)	ydeU	ydeU	<i>ydeU</i>&nbsp;&larr;	b1509; conserved protein	b1509; conserved protein	ECB_01471	snp_pseudogene	pseudogene	11330
3086	LTEE	Ara-1	50000	REL11330	A	point-mutator	SNP	1570155	1570155	pseudogene (478/1401 nt)	1570155	T&rarr;G	pseudogene&nbsp;(478/1401&nbsp;nt)	ydeU	ydeU	<i>ydeU</i>&nbsp;&larr;	b1509; conserved protein	b1509; conserved protein	ECB_01471	snp_pseudogene	pseudogene	11330
3087	LTEE	Ara-1	50000	REL11330	A	point-mutator	SNP	1574967	1574967	601	1574967	T&rarr;G	<font class=snp_type_nonsynonymous>I201L</font>&nbsp;(<font class=mutation_in_codon>A</font>TT&rarr;<font class=mutation_in_codon>C</font>TT)&nbsp;	yneE	yneE	<i>yneE</i>&nbsp;&larr;	conserved inner membrane protein	conserved inner membrane protein	ECB_01477	snp_nonsynonymous	nonsynonymous	11330
3088	LTEE	Ara-1	50000	REL11330	A	point-mutator	SNP	1578876	1578876	intergenic (-477/+133)	1578876	A&rarr;C	intergenic&nbsp;(&#8209;477/+133)	yneF,yneG	yneF/yneG	<i>yneF</i>&nbsp;&larr;&nbsp;/&nbsp;&larr;&nbsp;<i>yneG</i>	predicted diguanylate cyclase/hypothetical protein	predicted diguanylate cyclase/hypothetical protein	ECB_01479/ECB_01480	snp_intergenic	intergenic	11330
3089	LTEE	Ara-1	50000	REL11330	A	point-mutator	SNP	1586990	1586990	105	1586990	G&rarr;A	<font class=snp_type_synonymous>P35P</font>&nbsp;(CC<font class=mutation_in_codon>G</font>&rarr;CC<font class=mutation_in_codon>A</font>)&nbsp;	marR	marR	<i>marR</i>&nbsp;&rarr;	DNA-binding transcriptional repressor of multiple antibiotic resistance	DNA&#8209;binding transcriptional repressor of multiple antibiotic resistance	ECB_01489	snp_synonymous	synonymous	11330
3090	LTEE	Ara-1	50000	REL11330	A	point-mutator	SNP	1599357	1599357	696	1599357	A&rarr;C	<font class=snp_type_nonsynonymous>I232M</font>&nbsp;(AT<font class=mutation_in_codon>T</font>&rarr;AT<font class=mutation_in_codon>G</font>)&nbsp;	ydfJ	ydfJ	<i>ydfJ</i>&nbsp;&larr;	predicted transporter	predicted transporter	ECB_01502	snp_nonsynonymous	nonsynonymous	11330
3091	LTEE	Ara-1	50000	REL11330	A	point-mutator	SNP	1607775	1607775	158	1607775	A&rarr;C	<font class=snp_type_nonsynonymous>I53R</font>&nbsp;(A<font class=mutation_in_codon>T</font>A&rarr;A<font class=mutation_in_codon>G</font>A)&nbsp;	ECB_01510	ECB_01510	<i>ECB_01510</i>&nbsp;&larr;	putative tail component of prophage	putative tail component of prophage	ECB_01510	snp_nonsynonymous	nonsynonymous	11330
3092	LTEE	Ara-1	50000	REL11330	A	point-mutator	DEL	1609130	1616683	NA	1609130	&Delta;7,554&nbsp;bp	between&nbsp;IS<i>3</i>	[insF-3],ybcW,gnsB,ynfN,ECB_01516,cspI,ydfP,ydfQ,ydfR,essQ,ECB_01522,ECB_01523,insE-4,[insF-4]	[insF-3]–[insF-4]	<i>[insF&#8209;3]</i>&#8211;<i>[insF&#8209;4]</i>	[insF-3], ybcW, gnsB, ynfN, ECB_01516, cspI, ydfP, ydfQ, ydfR, essQ, ECB_01522, ECB_01523, insE-4, [insF-4]	<i>[insF&#8209;3], ybcW, gnsB, ynfN, ECB_01516, cspI, ydfP, ydfQ, ydfR, essQ, ECB_01522, ECB_01523, insE&#8209;4, [insF&#8209;4]</i>	[ECB_01512]–[ECB_01525]	large_deletion	not_snp	11330
3093	LTEE	Ara-1	50000	REL11330	A	point-mutator	SNP	1619782	1619782	intergenic (-19/+193)	1619782	T&rarr;G	intergenic&nbsp;(&#8209;19/+193)	hokD,ECB_01533	hokD/ECB_01533	<i>hokD</i>&nbsp;&larr;&nbsp;/&nbsp;&larr;&nbsp;<i>ECB_01533</i>	small toxic polypeptide/conserved hypothetical protein	small toxic polypeptide/conserved hypothetical protein	ECB_01532/ECB_01533	snp_intergenic	intergenic	11330
3094	LTEE	Ara-1	50000	REL11330	A	point-mutator	SNP	1623371	1623371	99	1623371	T&rarr;G	<font class=snp_type_synonymous>I33I</font>&nbsp;(AT<font class=mutation_in_codon>A</font>&rarr;AT<font class=mutation_in_codon>C</font>)&nbsp;	dicC	dicC	<i>dicC</i>&nbsp;&larr;	transcriptional repressor of cell division inhibition protein	transcriptional repressor of cell division inhibition protein	ECB_01538	snp_synonymous	synonymous	11330
3095	LTEE	Ara-1	50000	REL11330	A	point-mutator	MOB	1632978	1632986	intergenic (-110/-17)	1632978	IS<i>1</i>&nbsp;(+)&nbsp;+9&nbsp;bp	intergenic&nbsp;(&#8209;110/&#8209;17)	ynfA,ynfB	ynfA/ynfB	<i>ynfA</i>&nbsp;&larr;&nbsp;/&nbsp;&rarr;&nbsp;<i>ynfB</i>	hypothetical protein/hypothetical protein	hypothetical protein/hypothetical protein	ECB_01551/ECB_01552	mobile_element_insertion	not_snp	11330
3096	LTEE	Ara-1	50000	REL11330	A	point-mutator	SNP	1637144	1637144	1881	1637144	T&rarr;G	<font class=snp_type_synonymous>R627R</font>&nbsp;(CG<font class=mutation_in_codon>T</font>&rarr;CG<font class=mutation_in_codon>G</font>)&nbsp;	ynfE	ynfE	<i>ynfE</i>&nbsp;&rarr;	oxidoreductase subunit	oxidoreductase subunit	ECB_01556	snp_synonymous	synonymous	11330
3097	LTEE	Ara-1	50000	REL11330	A	point-mutator	SNP	1637704	1637704	intergenic (+14/-47)	1637704	T&rarr;G	intergenic&nbsp;(+14/&#8209;47)	ynfE,ynfF	ynfE/ynfF	<i>ynfE</i>&nbsp;&rarr;&nbsp;/&nbsp;&rarr;&nbsp;<i>ynfF</i>	oxidoreductase subunit/oxidoreductase subunit	oxidoreductase subunit/oxidoreductase subunit	ECB_01556/ECB_01557	snp_intergenic	intergenic	11330
3098	LTEE	Ara-1	50000	REL11330	A	point-mutator	SNP	1639197	1639197	1447	1639197	A&rarr;C	<font class=snp_type_nonsynonymous>N483H</font>&nbsp;(<font class=mutation_in_codon>A</font>AT&rarr;<font class=mutation_in_codon>C</font>AT)&nbsp;	ynfF	ynfF	<i>ynfF</i>&nbsp;&rarr;	oxidoreductase subunit	oxidoreductase subunit	ECB_01557	snp_nonsynonymous	nonsynonymous	11330
3099	LTEE	Ara-1	50000	REL11330	A	point-mutator	SNP	1647889	1647889	996	1647889	A&rarr;C	<font class=snp_type_synonymous>G332G</font>&nbsp;(GG<font class=mutation_in_codon>A</font>&rarr;GG<font class=mutation_in_codon>C</font>)&nbsp;	ynfM	ynfM	<i>ynfM</i>&nbsp;&rarr;	predicted transporter	predicted transporter	ECB_01565	snp_synonymous	synonymous	11330
3100	LTEE	Ara-1	50000	REL11330	A	point-mutator	SNP	1659543	1659543	199	1659543	T&rarr;G	<font class=snp_type_nonsynonymous>C67G</font>&nbsp;(<font class=mutation_in_codon>T</font>GT&rarr;<font class=mutation_in_codon>G</font>GT)&nbsp;	rstA	rstA	<i>rstA</i>&nbsp;&rarr;	DNA-binding response regulator in two-component regulatory system with RstB	DNA&#8209;binding response regulator in two&#8209;component regulatory system with RstB	ECB_01577	snp_nonsynonymous	nonsynonymous	11330
3101	LTEE	Ara-1	50000	REL11330	A	point-mutator	SNP	1661291	1661291	1215	1661291	T&rarr;G	<font class=snp_type_synonymous>V405V</font>&nbsp;(GT<font class=mutation_in_codon>T</font>&rarr;GT<font class=mutation_in_codon>G</font>)&nbsp;	rstB	rstB	<i>rstB</i>&nbsp;&rarr;	sensory histidine kinase in two-component regulatory system with RstA	sensory histidine kinase in two&#8209;component regulatory system with RstA	ECB_01578	snp_synonymous	synonymous	11330
3102	LTEE	Ara-1	50000	REL11330	A	point-mutator	SNP	1665858	1665858	88	1665858	A&rarr;C	<font class=snp_type_nonsynonymous>S30R</font>&nbsp;(<font class=mutation_in_codon>A</font>GC&rarr;<font class=mutation_in_codon>C</font>GC)&nbsp;	manA	manA	<i>manA</i>&nbsp;&rarr;	mannose-6-phosphate isomerase	mannose&#8209;6&#8209;phosphate isomerase	ECB_01582	snp_nonsynonymous	nonsynonymous	11330
3103	LTEE	Ara-1	50000	REL11330	A	point-mutator	SNP	1677699	1677699	1151	1677699	T&rarr;G	<font class=snp_type_nonsynonymous>F384C</font>&nbsp;(T<font class=mutation_in_codon>T</font>C&rarr;T<font class=mutation_in_codon>G</font>C)&nbsp;	malX	malX	<i>malX</i>&nbsp;&rarr;	fused maltose and glucose-specific PTS enzymes: IIB component - IIC component	fused maltose and glucose&#8209;specific PTS enzymes: IIB component &#8209; IIC component	ECB_01590	snp_nonsynonymous	nonsynonymous	11330
3104	LTEE	Ara-1	50000	REL11330	A	point-mutator	SNP	1680600	1680600	903	1680600	A&rarr;C	<font class=snp_type_synonymous>A301A</font>&nbsp;(GC<font class=mutation_in_codon>T</font>&rarr;GC<font class=mutation_in_codon>G</font>)&nbsp;	ydgJ	ydgJ	<i>ydgJ</i>&nbsp;&larr;	predicted oxidoreductase	predicted oxidoreductase	ECB_01593	snp_synonymous	synonymous	11330
3105	LTEE	Ara-1	50000	REL11330	A	point-mutator	SNP	1682608	1682608	165	1682608	A&rarr;C	<font class=snp_type_nonsynonymous>Q55H</font>&nbsp;(CA<font class=mutation_in_codon>A</font>&rarr;CA<font class=mutation_in_codon>C</font>)&nbsp;	ydgK	ydgK	<i>ydgK</i>&nbsp;&rarr;	conserved inner membrane protein	conserved inner membrane protein	ECB_01596	snp_nonsynonymous	nonsynonymous	11330
3106	LTEE	Ara-1	50000	REL11330	A	point-mutator	SNP	1687839	1687839	442	1687839	A&rarr;C	<font class=snp_type_nonsynonymous>K148Q</font>&nbsp;(<font class=mutation_in_codon>A</font>AA&rarr;<font class=mutation_in_codon>C</font>AA)&nbsp;	rnfG	rnfG	<i>rnfG</i>&nbsp;&rarr;	electron transport complex protein RnfG	electron transport complex protein RnfG	ECB_01601	snp_nonsynonymous	nonsynonymous	11330
3107	LTEE	Ara-1	50000	REL11330	A	point-mutator	SNP	1693534	1693534	883	1693534	T&rarr;G	<font class=snp_type_nonsynonymous>K295Q</font>&nbsp;(<font class=mutation_in_codon>A</font>AA&rarr;<font class=mutation_in_codon>C</font>AA)&nbsp;	tyrS	tyrS	<i>tyrS</i>&nbsp;&larr;	tyrosyl-tRNA synthetase	tyrosyl&#8209;tRNA synthetase	ECB_01607	snp_nonsynonymous	nonsynonymous	11330
3108	LTEE	Ara-1	50000	REL11330	A	point-mutator	SNP	1701303	1701303	1989	1701303	A&rarr;C	<font class=snp_type_synonymous>P663P</font>&nbsp;(CC<font class=mutation_in_codon>A</font>&rarr;CC<font class=mutation_in_codon>C</font>)&nbsp;	ydhK	ydhK	<i>ydhK</i>&nbsp;&rarr;	conserved inner membrane protein	conserved inner membrane protein	ECB_01615	snp_synonymous	synonymous	11330
3109	LTEE	Ara-1	50000	REL11330	A	point-mutator	SNP	1706209	1706209	intergenic (+21/-72)	1706209	A&rarr;C	intergenic&nbsp;(+21/&#8209;72)	rnt,lhr	rnt/lhr	<i>rnt</i>&nbsp;&rarr;&nbsp;/&nbsp;&rarr;&nbsp;<i>lhr</i>	ribonuclease T/predicted ATP-dependent helicase	ribonuclease T/predicted ATP&#8209;dependent helicase	ECB_01622/ECB_01623	snp_intergenic	intergenic	11330
3110	LTEE	Ara-1	50000	REL11330	A	point-mutator	SNP	1707216	1707216	936	1707216	A&rarr;C	<font class=snp_type_nonsynonymous>L312F</font>&nbsp;(TT<font class=mutation_in_codon>A</font>&rarr;TT<font class=mutation_in_codon>C</font>)&nbsp;	lhr	lhr	<i>lhr</i>&nbsp;&rarr;	predicted ATP-dependent helicase	predicted ATP&#8209;dependent helicase	ECB_01623	snp_nonsynonymous	nonsynonymous	11330
3111	LTEE	Ara-1	50000	REL11330	A	point-mutator	SNP	1708787	1708787	2507	1708787	A&rarr;C	<font class=snp_type_nonsynonymous>Y836S</font>&nbsp;(T<font class=mutation_in_codon>A</font>T&rarr;T<font class=mutation_in_codon>C</font>T)&nbsp;	lhr	lhr	<i>lhr</i>&nbsp;&rarr;	predicted ATP-dependent helicase	predicted ATP&#8209;dependent helicase	ECB_01623	snp_nonsynonymous	nonsynonymous	11330
3112	LTEE	Ara-1	50000	REL11330	A	point-mutator	SNP	1712230	1712230	602	1712230	T&rarr;G	<font class=snp_type_nonsynonymous>I201S</font>&nbsp;(A<font class=mutation_in_codon>T</font>C&rarr;A<font class=mutation_in_codon>G</font>C)&nbsp;	ydhO	ydhO	<i>ydhO</i>&nbsp;&rarr;	predicted lipoprotein	predicted lipoprotein	ECB_01625	snp_nonsynonymous	nonsynonymous	11330
3113	LTEE	Ara-1	50000	REL11330	A	point-mutator	SNP	1712380	1712380	752	1712380	A&rarr;C	<font class=snp_type_nonsynonymous>E251A</font>&nbsp;(G<font class=mutation_in_codon>A</font>A&rarr;G<font class=mutation_in_codon>C</font>A)&nbsp;	ydhO	ydhO	<i>ydhO</i>&nbsp;&rarr;	predicted lipoprotein	predicted lipoprotein	ECB_01625	snp_nonsynonymous	nonsynonymous	11330
3114	LTEE	Ara-1	50000	REL11330	A	point-mutator	SNP	1715410	1715410	300	1715410	T&rarr;G	<font class=snp_type_nonsynonymous>N100K</font>&nbsp;(AA<font class=mutation_in_codon>T</font>&rarr;AA<font class=mutation_in_codon>G</font>)&nbsp;	purR	purR	<i>purR</i>&nbsp;&rarr;	DNA-binding transcriptional repressor, hypoxanthine-binding	DNA&#8209;binding transcriptional repressor, hypoxanthine&#8209;binding	ECB_01629	snp_nonsynonymous	nonsynonymous	11330
3115	LTEE	Ara-1	50000	REL11330	A	point-mutator	SNP	1718773	1718773	94	1718773	A&rarr;C	<font class=snp_type_nonsynonymous>N32H</font>&nbsp;(<font class=mutation_in_codon>A</font>AC&rarr;<font class=mutation_in_codon>C</font>AC)&nbsp;	cfa	cfa	<i>cfa</i>&nbsp;&rarr;	cyclopropane fatty acyl phospholipid synthase (unsaturated-phospholipid methyltransferase)	cyclopropane fatty acyl phospholipid synthase (unsaturated&#8209;phospholipid methyltransferase)	ECB_01632	snp_nonsynonymous	nonsynonymous	11330
3116	LTEE	Ara-1	50000	REL11330	A	point-mutator	SNP	1724002	1724002	36	1724002	T&rarr;G	<font class=snp_type_nonsynonymous>N12K</font>&nbsp;(AA<font class=mutation_in_codon>T</font>&rarr;AA<font class=mutation_in_codon>G</font>)&nbsp;	ydhR	ydhR	<i>ydhR</i>&nbsp;&rarr;	hypothetical protein	hypothetical protein	ECB_01636	snp_nonsynonymous	nonsynonymous	11330
3117	LTEE	Ara-1	50000	REL11330	A	point-mutator	SNP	1726466	1726466	361	1726466	T&rarr;G	<font class=snp_type_nonsynonymous>S121R</font>&nbsp;(<font class=mutation_in_codon>A</font>GC&rarr;<font class=mutation_in_codon>C</font>GC)&nbsp;	ydhT	ydhT	<i>ydhT</i>&nbsp;&larr;	hypothetical protein	hypothetical protein	ECB_01638	snp_nonsynonymous	nonsynonymous	11330
3118	LTEE	Ara-1	50000	REL11330	A	point-mutator	SNP	1726468	1726468	359	1726468	T&rarr;G	<font class=snp_type_nonsynonymous>Y120S</font>&nbsp;(T<font class=mutation_in_codon>A</font>T&rarr;T<font class=mutation_in_codon>C</font>T)&nbsp;	ydhT	ydhT	<i>ydhT</i>&nbsp;&larr;	hypothetical protein	hypothetical protein	ECB_01638	snp_nonsynonymous	nonsynonymous	11330
3119	LTEE	Ara-1	50000	REL11330	A	point-mutator	SNP	1732450	1732450	intergenic (-42/-515)	1732450	A&rarr;C	intergenic&nbsp;(&#8209;42/&#8209;515)	ydhZ,pykF	ydhZ/pykF	<i>ydhZ</i>&nbsp;&larr;&nbsp;/&nbsp;&rarr;&nbsp;<i>pykF</i>	hypothetical protein/pyruvate kinase	hypothetical protein/pyruvate kinase	ECB_01644/ECB_01645	snp_intergenic	intergenic	11330
3120	LTEE	Ara-1	50000	REL11330	A	point-mutator	MOB	1733647	1733649	coding (683-685/1413 nt)	1733647	IS<i>150</i>&nbsp;(&#8211;)&nbsp;+3&nbsp;bp	coding&nbsp;(683&#8209;685/1413&nbsp;nt)	pykF	pykF	<i>pykF</i>&nbsp;&rarr;	pyruvate kinase	pyruvate kinase	ECB_01645	mobile_element_insertion	not_snp	11330
3121	LTEE	Ara-1	50000	REL11330	A	point-mutator	SNP	1741713	1741713	intergenic (-60/+488)	1741713	A&rarr;C	intergenic&nbsp;(&#8209;60/+488)	sufA,ydiH	sufA/ydiH	<i>sufA</i>&nbsp;&larr;&nbsp;/&nbsp;&larr;&nbsp;<i>ydiH</i>	iron-sulfur cluster assembly scaffold protein/hypothetical protein	iron&#8209;sulfur cluster assembly scaffold protein/hypothetical protein	ECB_01653/ECB_01654	snp_intergenic	intergenic	11330
3122	LTEE	Ara-1	50000	REL11330	A	point-mutator	SNP	1745953	1745953	intergenic (-1/-388)	1745953	T&rarr;G	intergenic&nbsp;(&#8209;1/&#8209;388)	ydiJ,ydiK	ydiJ/ydiK	<i>ydiJ</i>&nbsp;&larr;&nbsp;/&nbsp;&rarr;&nbsp;<i>ydiK</i>	predicted FAD-linked oxidoreductase/predicted inner membrane protein	predicted FAD&#8209;linked oxidoreductase/predicted inner membrane protein	ECB_01656/ECB_01657	snp_intergenic	intergenic	11330
3123	LTEE	Ara-1	50000	REL11330	A	point-mutator	SNP	1748131	1748131	250	1748131	T&rarr;G	<font class=snp_type_nonsynonymous>L84V</font>&nbsp;(<font class=mutation_in_codon>T</font>TA&rarr;<font class=mutation_in_codon>G</font>TA)&nbsp;	ydiL	ydiL	<i>ydiL</i>&nbsp;&rarr;	hypothetical protein	hypothetical protein	ECB_01658	snp_nonsynonymous	nonsynonymous	11330
3124	LTEE	Ara-1	50000	REL11330	A	point-mutator	SNP	1754129	1754129	1275	1754129	A&rarr;C	<font class=snp_type_synonymous>T425T</font>&nbsp;(AC<font class=mutation_in_codon>A</font>&rarr;AC<font class=mutation_in_codon>C</font>)&nbsp;	ydiF	ydiF	<i>ydiF</i>&nbsp;&rarr;	fused predicted acetyl-CoA:acetoacetyl-CoA transferase: alpha subunit/beta subunit	fused predicted acetyl&#8209;CoA:acetoacetyl&#8209;CoA transferase: alpha subunit/beta subunit	ECB_01663	snp_synonymous	synonymous	11330
3125	LTEE	Ara-1	50000	REL11330	A	point-mutator	SNP	1754783	1754783	320	1754783	A&rarr;C	<font class=snp_type_nonsynonymous>K107T</font>&nbsp;(A<font class=mutation_in_codon>A</font>A&rarr;A<font class=mutation_in_codon>C</font>A)&nbsp;	ydiO	ydiO	<i>ydiO</i>&nbsp;&rarr;	predicted acyl-CoA dehydrogenase	predicted acyl&#8209;CoA dehydrogenase	ECB_01664	snp_nonsynonymous	nonsynonymous	11330
3126	LTEE	Ara-1	50000	REL11330	A	point-mutator	SNP	1758779	1758779	117	1758779	T&rarr;G	<font class=snp_type_nonsynonymous>S39R</font>&nbsp;(AG<font class=mutation_in_codon>T</font>&rarr;AG<font class=mutation_in_codon>G</font>)&nbsp;	ydiS	ydiS	<i>ydiS</i>&nbsp;&rarr;	predicted oxidoreductase with FAD/NAD(P)-binding domain	predicted oxidoreductase with FAD/NAD(P)&#8209;binding domain	ECB_01668	snp_nonsynonymous	nonsynonymous	11330
3127	LTEE	Ara-1	50000	REL11330	A	point-mutator	DEL	1764955	1764955	coding (243/834 nt)	1764955	&Delta;1&nbsp;bp	coding&nbsp;(243/834&nbsp;nt)	ydiA	ydiA	<i>ydiA</i>&nbsp;&rarr;	hypothetical protein	hypothetical protein	ECB_01672	small_indel	not_snp	11330
3128	LTEE	Ara-1	50000	REL11330	A	point-mutator	SNP	1782154	1782154	pseudogene (1312/1416 nt)	1782154	A&rarr;C	pseudogene&nbsp;(1312/1416&nbsp;nt)	arpB	arpB	<i>arpB</i>&nbsp;&rarr;	hypothetical protein; ankyrin-repeat protein B; b1721(b4494)	hypothetical protein; ankyrin&#8209;repeat protein B; b1721(b4494)	ECB_01689	snp_pseudogene	pseudogene	11330
3129	LTEE	Ara-1	50000	REL11330	A	point-mutator	SNP	1786462	1786462	37	1786462	T&rarr;G	<font class=snp_type_nonsynonymous>K13Q</font>&nbsp;(<font class=mutation_in_codon>A</font>AA&rarr;<font class=mutation_in_codon>C</font>AA)&nbsp;	yniB	yniB	<i>yniB</i>&nbsp;&larr;	predicted inner membrane protein	predicted inner membrane protein	ECB_01695	snp_nonsynonymous	nonsynonymous	11330
3130	LTEE	Ara-1	50000	REL11330	A	point-mutator	SNP	1786512	1786512	intergenic (-14/-133)	1786512	T&rarr;G	intergenic&nbsp;(&#8209;14/&#8209;133)	yniB,yniC	yniB/yniC	<i>yniB</i>&nbsp;&larr;&nbsp;/&nbsp;&rarr;&nbsp;<i>yniC</i>	predicted inner membrane protein/predicted hydrolase	predicted inner membrane protein/predicted hydrolase	ECB_01695/ECB_01696	snp_intergenic	intergenic	11330
3131	LTEE	Ara-1	50000	REL11330	A	point-mutator	SNP	1790190	1790190	220	1790190	T&rarr;G	<font class=snp_type_nonsynonymous>K74Q</font>&nbsp;(<font class=mutation_in_codon>A</font>AG&rarr;<font class=mutation_in_codon>C</font>AG)&nbsp;	ydjO	ydjO	<i>ydjO</i>&nbsp;&larr;	hypothetical protein	hypothetical protein	ECB_01699	snp_nonsynonymous	nonsynonymous	11330
3132	LTEE	Ara-1	50000	REL11330	A	point-mutator	SNP	1791045	1791045	intergenic (-96/-87)	1791045	A&rarr;C	intergenic&nbsp;(&#8209;96/&#8209;87)	cedA,katE	cedA/katE	<i>cedA</i>&nbsp;&larr;&nbsp;/&nbsp;&rarr;&nbsp;<i>katE</i>	cell division modulator/hydroperoxidase HPII(III) (catalase)	cell division modulator/hydroperoxidase HPII(III) (catalase)	ECB_01700/ECB_01701	snp_intergenic	intergenic	11330
3133	LTEE	Ara-1	50000	REL11330	A	point-mutator	SNP	1791600	1791600	469	1791600	A&rarr;C	<font class=snp_type_nonsynonymous>N157H</font>&nbsp;(<font class=mutation_in_codon>A</font>AC&rarr;<font class=mutation_in_codon>C</font>AC)&nbsp;	katE	katE	<i>katE</i>&nbsp;&rarr;	hydroperoxidase HPII(III) (catalase)	hydroperoxidase HPII(III) (catalase)	ECB_01701	snp_nonsynonymous	nonsynonymous	11330
3134	LTEE	Ara-1	50000	REL11330	A	point-mutator	SNP	1795074	1795074	692	1795074	T&rarr;G	<font class=snp_type_nonsynonymous>K231T</font>&nbsp;(A<font class=mutation_in_codon>A</font>A&rarr;A<font class=mutation_in_codon>C</font>A)&nbsp;	celF	celF	<i>celF</i>&nbsp;&larr;	cryptic phospho-beta-glucosidase, NAD(P)-binding	cryptic phospho&#8209;beta&#8209;glucosidase, NAD(P)&#8209;binding	ECB_01703	snp_nonsynonymous	nonsynonymous	11330
3135	LTEE	Ara-1	50000	REL11330	A	point-mutator	SNP	1796383	1796383	330	1796383	A&rarr;C	<font class=snp_type_synonymous>P110P</font>&nbsp;(CC<font class=mutation_in_codon>T</font>&rarr;CC<font class=mutation_in_codon>G</font>)&nbsp;	celD	celD	<i>celD</i>&nbsp;&larr;	DNA-binding transcriptional dual regulator	DNA&#8209;binding transcriptional dual regulator	ECB_01704	snp_synonymous	synonymous	11330
3136	LTEE	Ara-1	50000	REL11330	A	point-mutator	SNP	1798556	1798556	intergenic (-77/+8)	1798556	A&rarr;C	intergenic&nbsp;(&#8209;77/+8)	celB,celA	celB/celA	<i>celB</i>&nbsp;&larr;&nbsp;/&nbsp;&larr;&nbsp;<i>celA</i>	N,N'-diacetylchitobiose-specific enzyme IIC component of PTS/N,N'-diacetylchitobiose-specific enzyme IIB component of PTS	N,N'&#8209;diacetylchitobiose&#8209;specific enzyme IIC component of PTS/N,N'&#8209;diacetylchitobiose&#8209;specific enzyme IIB component of PTS	ECB_01706/ECB_01707	snp_intergenic	intergenic	11330
3137	LTEE	Ara-1	50000	REL11330	A	point-mutator	SNP	1798721	1798721	164	1798721	A&rarr;C	<font class=snp_type_nonsense>L55*</font>&nbsp;(T<font class=mutation_in_codon>T</font>A&rarr;T<font class=mutation_in_codon>G</font>A)&nbsp;	celA	celA	<i>celA</i>&nbsp;&larr;	N,N'-diacetylchitobiose-specific enzyme IIB component of PTS	N,N'&#8209;diacetylchitobiose&#8209;specific enzyme IIB component of PTS	ECB_01707	snp_nonsense	nonsense	11330
3138	LTEE	Ara-1	50000	REL11330	A	point-mutator	SNP	1801265	1801265	486	1801265	A&rarr;C	<font class=snp_type_nonsynonymous>E162D</font>&nbsp;(GA<font class=mutation_in_codon>A</font>&rarr;GA<font class=mutation_in_codon>C</font>)&nbsp;	ydjQ	ydjQ	<i>ydjQ</i>&nbsp;&rarr;	endonuclease of nucleotide excision repair	endonuclease of nucleotide excision repair	ECB_01710	snp_nonsynonymous	nonsynonymous	11330
3139	LTEE	Ara-1	50000	REL11330	A	point-mutator	SNP	1808909	1808909	339	1808909	T&rarr;G	<font class=snp_type_synonymous>L113L</font>&nbsp;(CT<font class=mutation_in_codon>A</font>&rarr;CT<font class=mutation_in_codon>C</font>)&nbsp;	astC	astC	<i>astC</i>&nbsp;&larr;	succinylornithine transaminase, PLP-dependent	succinylornithine transaminase, PLP&#8209;dependent	ECB_01717	snp_synonymous	synonymous	11330
3140	LTEE	Ara-1	50000	REL11330	A	point-mutator	SNP	1811352	1811352	687	1811352	T&rarr;G	<font class=snp_type_synonymous>L229L</font>&nbsp;(CT<font class=mutation_in_codon>T</font>&rarr;CT<font class=mutation_in_codon>G</font>)&nbsp;	ydjX	ydjX	<i>ydjX</i>&nbsp;&rarr;	predicted inner membrane protein	predicted inner membrane protein	ECB_01719	snp_synonymous	synonymous	11330
3141	LTEE	Ara-1	50000	REL11330	A	point-mutator	SNP	1812465	1812465	430	1812465	T&rarr;G	<font class=snp_type_nonsynonymous>Y144D</font>&nbsp;(<font class=mutation_in_codon>T</font>AC&rarr;<font class=mutation_in_codon>G</font>AC)&nbsp;	ydjZ	ydjZ	<i>ydjZ</i>&nbsp;&rarr;	conserved inner membrane protein	conserved inner membrane protein	ECB_01721	snp_nonsynonymous	nonsynonymous	11330
3142	LTEE	Ara-1	50000	REL11330	A	point-mutator	SNP	1819200	1819200	164	1819200	T&rarr;G	<font class=snp_type_nonsynonymous>N55T</font>&nbsp;(A<font class=mutation_in_codon>A</font>T&rarr;A<font class=mutation_in_codon>C</font>T)&nbsp;	ynjH	ynjH	<i>ynjH</i>&nbsp;&larr;	hypothetical protein	hypothetical protein	ECB_01729	snp_nonsynonymous	nonsynonymous	11330
3143	LTEE	Ara-1	50000	REL11330	A	point-mutator	MOB	1821525	1821527	coding (573-575/1041 nt)	1821525	IS<i>150</i>&nbsp;(&#8211;)&nbsp;+3&nbsp;bp	coding&nbsp;(573&#8209;575/1041&nbsp;nt)	ynjI	ynjI	<i>ynjI</i>&nbsp;&larr;	predicted inner membrane protein	predicted inner membrane protein	ECB_01731	mobile_element_insertion	not_snp	11330
3144	LTEE	Ara-1	50000	REL11330	A	point-mutator	SNP	1822771	1822771	1418	1822771	A&rarr;C	<font class=snp_type_nonsynonymous>L473W</font>&nbsp;(T<font class=mutation_in_codon>T</font>G&rarr;T<font class=mutation_in_codon>G</font>G)&nbsp;	topB	topB	<i>topB</i>&nbsp;&larr;	DNA topoisomerase III	DNA topoisomerase III	ECB_01732	snp_nonsynonymous	nonsynonymous	11330
3145	LTEE	Ara-1	50000	REL11330	A	point-mutator	SNP	1826639	1826639	575	1826639	T&rarr;G	<font class=snp_type_nonsynonymous>L192W</font>&nbsp;(T<font class=mutation_in_codon>T</font>G&rarr;T<font class=mutation_in_codon>G</font>G)&nbsp;	sppA	sppA	<i>sppA</i>&nbsp;&rarr;	protease IV (signal peptide peptidase)	protease IV (signal peptide peptidase)	ECB_01735	snp_nonsynonymous	nonsynonymous	11330
3146	LTEE	Ara-1	50000	REL11330	A	point-mutator	SNP	1832346	1832346	855	1832346	T&rarr;G	<font class=snp_type_nonsynonymous>L285F</font>&nbsp;(TT<font class=mutation_in_codon>A</font>&rarr;TT<font class=mutation_in_codon>C</font>)&nbsp;	ydjG	ydjG	<i>ydjG</i>&nbsp;&larr;	predicted oxidoreductase	predicted oxidoreductase	ECB_01740	snp_nonsynonymous	nonsynonymous	11330
3147	LTEE	Ara-1	50000	REL11330	A	point-mutator	SNP	1834004	1834004	154	1834004	A&rarr;C	<font class=snp_type_nonsynonymous>S52A</font>&nbsp;(<font class=mutation_in_codon>T</font>CT&rarr;<font class=mutation_in_codon>G</font>CT)&nbsp;	ydjH	ydjH	<i>ydjH</i>&nbsp;&larr;	predicted kinase	predicted kinase	ECB_01741	snp_nonsynonymous	nonsynonymous	11330
3148	LTEE	Ara-1	50000	REL11330	A	point-mutator	SNP	1836496	1836496	963	1836496	C&rarr;A	<font class=snp_type_synonymous>L321L</font>&nbsp;(CT<font class=mutation_in_codon>G</font>&rarr;CT<font class=mutation_in_codon>T</font>)&nbsp;	ydjK	ydjK	<i>ydjK</i>&nbsp;&larr;	predicted transporter	predicted transporter	ECB_01744	snp_synonymous	synonymous	11330
3149	LTEE	Ara-1	50000	REL11330	A	point-mutator	SNP	1837688	1837688	874	1837688	C&rarr;A	<font class=snp_type_nonsynonymous>A292S</font>&nbsp;(<font class=mutation_in_codon>G</font>CC&rarr;<font class=mutation_in_codon>T</font>CC)&nbsp;	ydjL	ydjL	<i>ydjL</i>&nbsp;&larr;	predicted oxidoreductase, Zn-dependent and NAD(P)-binding	predicted oxidoreductase, Zn&#8209;dependent and NAD(P)&#8209;binding	ECB_01745	snp_nonsynonymous	nonsynonymous	11330
3150	LTEE	Ara-1	50000	REL11330	A	point-mutator	SNP	1837790	1837790	772	1837790	T&rarr;G	<font class=snp_type_nonsynonymous>I258L</font>&nbsp;(<font class=mutation_in_codon>A</font>TC&rarr;<font class=mutation_in_codon>C</font>TC)&nbsp;	ydjL	ydjL	<i>ydjL</i>&nbsp;&larr;	predicted oxidoreductase, Zn-dependent and NAD(P)-binding	predicted oxidoreductase, Zn&#8209;dependent and NAD(P)&#8209;binding	ECB_01745	snp_nonsynonymous	nonsynonymous	11330
3151	LTEE	Ara-1	50000	REL11330	A	point-mutator	SNP	1840904	1840904	905	1840904	A&rarr;C	<font class=snp_type_nonsynonymous>N302T</font>&nbsp;(A<font class=mutation_in_codon>A</font>C&rarr;A<font class=mutation_in_codon>C</font>C)&nbsp;	gapA	gapA	<i>gapA</i>&nbsp;&rarr;	glyceraldehyde-3-phosphate dehydrogenase	glyceraldehyde&#8209;3&#8209;phosphate dehydrogenase	ECB_01748	snp_nonsynonymous	nonsynonymous	11330
3152	LTEE	Ara-1	50000	REL11330	A	point-mutator	SNP	1847878	1847878	265	1847878	A&rarr;C	<font class=snp_type_nonsynonymous>N89H</font>&nbsp;(<font class=mutation_in_codon>A</font>AT&rarr;<font class=mutation_in_codon>C</font>AT)&nbsp;	yeaI	yeaI	<i>yeaI</i>&nbsp;&rarr;	predicted diguanylate cyclase	predicted diguanylate cyclase	ECB_01754	snp_nonsynonymous	nonsynonymous	11330
3153	LTEE	Ara-1	50000	REL11330	A	point-mutator	SNP	1854584	1854584	178	1854584	T&rarr;G	<font class=snp_type_nonsynonymous>N60H</font>&nbsp;(<font class=mutation_in_codon>A</font>AT&rarr;<font class=mutation_in_codon>C</font>AT)&nbsp;	yoaF	yoaF	<i>yoaF</i>&nbsp;&larr;	conserved outer membrane protein	conserved outer membrane protein	ECB_01762	snp_nonsynonymous	nonsynonymous	11330
3154	LTEE	Ara-1	50000	REL11330	A	point-mutator	SNP	1858409	1858409	intergenic (+176/+290)	1858409	A&rarr;C	intergenic&nbsp;(+176/+290)	insL-4,yeaS	insL-4/yeaS	<i>insL&#8209;4</i>&nbsp;&rarr;&nbsp;/&nbsp;&larr;&nbsp;<i>yeaS</i>	putative transposase insL for insertion sequence IS186/neutral amino-acid efflux system	putative transposase insL for insertion sequence IS186/neutral amino&#8209;acid efflux system	ECB_01767/ECB_01768	snp_intergenic	intergenic	11330
3155	LTEE	Ara-1	50000	REL11330	A	point-mutator	SNP	1866969	1866969	1356	1866969	A&rarr;C	<font class=snp_type_nonsynonymous>D452E</font>&nbsp;(GA<font class=mutation_in_codon>T</font>&rarr;GA<font class=mutation_in_codon>G</font>)&nbsp;	fadD	fadD	<i>fadD</i>&nbsp;&larr;	acyl-CoA synthase	acyl&#8209;CoA synthase	ECB_01775	snp_nonsynonymous	nonsynonymous	11330
3156	LTEE	Ara-1	50000	REL11330	A	point-mutator	SNP	1867570	1867570	755	1867570	A&rarr;C	<font class=snp_type_nonsynonymous>L252R</font>&nbsp;(C<font class=mutation_in_codon>T</font>G&rarr;C<font class=mutation_in_codon>G</font>G)&nbsp;	fadD	fadD	<i>fadD</i>&nbsp;&larr;	acyl-CoA synthase	acyl&#8209;CoA synthase	ECB_01775	snp_nonsynonymous	nonsynonymous	11330
3157	LTEE	Ara-1	50000	REL11330	A	point-mutator	SNP	1870303	1870303	1511	1870303	A&rarr;C	<font class=snp_type_nonsynonymous>L504W</font>&nbsp;(T<font class=mutation_in_codon>T</font>G&rarr;T<font class=mutation_in_codon>G</font>G)&nbsp;	yoaA	yoaA	<i>yoaA</i>&nbsp;&larr;	conserved protein with nucleoside triphosphate hydrolase domain	conserved protein with nucleoside triphosphate hydrolase domain	ECB_01778	snp_nonsynonymous	nonsynonymous	11330
3158	LTEE	Ara-1	50000	REL11330	A	point-mutator	SNP	1879113	1879113	1052	1879113	T&rarr;G	<font class=snp_type_nonsynonymous>K351T</font>&nbsp;(A<font class=mutation_in_codon>A</font>A&rarr;A<font class=mutation_in_codon>C</font>A)&nbsp;	yoaE	yoaE	<i>yoaE</i>&nbsp;&larr;	fused predicted membrane protein/conserved protein	fused predicted membrane protein/conserved protein	ECB_01786	snp_nonsynonymous	nonsynonymous	11330
3159	LTEE	Ara-1	50000	REL11330	A	point-mutator	SNP	1891498	1891498	1896	1891498	T&rarr;G	<font class=snp_type_nonsynonymous>K632N</font>&nbsp;(AA<font class=mutation_in_codon>A</font>&rarr;AA<font class=mutation_in_codon>C</font>)&nbsp;	prc	prc	<i>prc</i>&nbsp;&larr;	carboxy-terminal protease for penicillin-binding protein 3	carboxy&#8209;terminal protease for penicillin&#8209;binding protein 3	ECB_01801	snp_nonsynonymous	nonsynonymous	11330
3160	LTEE	Ara-1	50000	REL11330	A	point-mutator	SNP	1900667	1900667	intergenic (+74/-31)	1900667	T&rarr;G	intergenic&nbsp;(+74/&#8209;31)	yebV,yebW	yebV/yebW	<i>yebV</i>&nbsp;&rarr;&nbsp;/&nbsp;&rarr;&nbsp;<i>yebW</i>	hypothetical protein/hypothetical protein	hypothetical protein/hypothetical protein	ECB_01807/ECB_01808	snp_intergenic	intergenic	11330
3161	LTEE	Ara-1	50000	REL11330	A	point-mutator	SNP	1907004	1907004	412	1907004	T&rarr;G	<font class=snp_type_nonsynonymous>N138H</font>&nbsp;(<font class=mutation_in_codon>A</font>AC&rarr;<font class=mutation_in_codon>C</font>AC)&nbsp;	ptrB	ptrB	<i>ptrB</i>&nbsp;&larr;	protease II	protease II	ECB_01816	snp_nonsynonymous	nonsynonymous	11330
3162	LTEE	Ara-1	50000	REL11330	A	point-mutator	SNP	1915365	1915365	138	1915365	T&rarr;G	<font class=snp_type_synonymous>V46V</font>&nbsp;(GT<font class=mutation_in_codon>T</font>&rarr;GT<font class=mutation_in_codon>G</font>)&nbsp;	yebK	yebK	<i>yebK</i>&nbsp;&rarr;	predicted DNA-binding transcriptional regulator	predicted DNA&#8209;binding transcriptional regulator	ECB_01824	snp_synonymous	synonymous	11330
3163	LTEE	Ara-1	50000	REL11330	A	point-mutator	SNP	1920237	1920237	923	1920237	T&rarr;G	<font class=snp_type_nonsynonymous>K308T</font>&nbsp;(A<font class=mutation_in_codon>A</font>A&rarr;A<font class=mutation_in_codon>C</font>A)&nbsp;	znuA	znuA	<i>znuA</i>&nbsp;&larr;	high-affinity zinc transporter periplasmic component	high&#8209;affinity zinc transporter periplasmic component	ECB_01828	snp_nonsynonymous	nonsynonymous	11330
3164	LTEE	Ara-1	50000	REL11330	A	point-mutator	SNP	1922855	1922855	intergenic (+80/+261)	1922855	A&rarr;C	intergenic&nbsp;(+80/+261)	znuB,ruvB	znuB/ruvB	<i>znuB</i>&nbsp;&rarr;&nbsp;/&nbsp;&larr;&nbsp;<i>ruvB</i>	high-affinity zinc transporter membrane component/Holliday junction DNA helicase B	high&#8209;affinity zinc transporter membrane component/Holliday junction DNA helicase B	ECB_01830/ECB_01831	snp_intergenic	intergenic	11330
3165	LTEE	Ara-1	50000	REL11330	A	point-mutator	SNP	1923370	1923370	757	1923370	T&rarr;G	<font class=snp_type_nonsynonymous>M253L</font>&nbsp;(<font class=mutation_in_codon>A</font>TG&rarr;<font class=mutation_in_codon>C</font>TG)&nbsp;	ruvB	ruvB	<i>ruvB</i>&nbsp;&larr;	Holliday junction DNA helicase B	Holliday junction DNA helicase B	ECB_01831	snp_nonsynonymous	nonsynonymous	11330
3166	LTEE	Ara-1	50000	REL11330	A	point-mutator	SNP	1925689	1925689	458	1925689	A&rarr;C	<font class=snp_type_nonsynonymous>V153G</font>&nbsp;(G<font class=mutation_in_codon>T</font>T&rarr;G<font class=mutation_in_codon>G</font>T)&nbsp;	ruvC	ruvC	<i>ruvC</i>&nbsp;&larr;	Holliday junction resolvase	Holliday junction resolvase	ECB_01834	snp_nonsynonymous	nonsynonymous	11330
3167	LTEE	Ara-1	50000	REL11330	A	point-mutator	SNP	1930515	1930515	351	1930515	T&rarr;G	<font class=snp_type_nonsynonymous>F117L</font>&nbsp;(TT<font class=mutation_in_codon>T</font>&rarr;TT<font class=mutation_in_codon>G</font>)&nbsp;	yecE	yecE	<i>yecE</i>&nbsp;&rarr;	hypothetical protein	hypothetical protein	ECB_01839	snp_nonsynonymous	nonsynonymous	11330
3168	LTEE	Ara-1	50000	REL11330	A	point-mutator	SNP	1935892	1935892	1011	1935892	C&rarr;A	<font class=snp_type_nonsynonymous>M337I</font>&nbsp;(AT<font class=mutation_in_codon>G</font>&rarr;AT<font class=mutation_in_codon>T</font>)&nbsp;	torY	torY	<i>torY</i>&nbsp;&larr;	TMAO reductase III (TorYZ), cytochrome c-type subunit	TMAO reductase III (TorYZ), cytochrome c&#8209;type subunit	ECB_01844	snp_nonsynonymous	nonsynonymous	11330
3169	LTEE	Ara-1	50000	REL11330	A	point-mutator	SNP	1936330	1936330	573	1936330	A&rarr;C	<font class=snp_type_synonymous>T191T</font>&nbsp;(AC<font class=mutation_in_codon>T</font>&rarr;AC<font class=mutation_in_codon>G</font>)&nbsp;	torY	torY	<i>torY</i>&nbsp;&larr;	TMAO reductase III (TorYZ), cytochrome c-type subunit	TMAO reductase III (TorYZ), cytochrome c&#8209;type subunit	ECB_01844	snp_synonymous	synonymous	11330
3170	LTEE	Ara-1	50000	REL11330	A	point-mutator	SNP	1941950	1941950	1871	1941950	A&rarr;C	<font class=snp_type_nonsynonymous>L624R</font>&nbsp;(C<font class=mutation_in_codon>T</font>G&rarr;C<font class=mutation_in_codon>G</font>G)&nbsp;	flhA	flhA	<i>flhA</i>&nbsp;&larr;	flagellar biosynthesis protein A	flagellar biosynthesis protein A	ECB_01850	snp_nonsynonymous	nonsynonymous	11330
3171	LTEE	Ara-1	50000	REL11330	A	point-mutator	SNP	1947848	1947848	287	1947848	A&rarr;C	<font class=snp_type_nonsynonymous>F96C</font>&nbsp;(T<font class=mutation_in_codon>T</font>T&rarr;T<font class=mutation_in_codon>G</font>T)&nbsp;	cheR	cheR	<i>cheR</i>&nbsp;&larr;	chemotaxis regulator, protein-glutamate methyltransferase	chemotaxis regulator, protein&#8209;glutamate methyltransferase	ECB_01855	snp_nonsynonymous	nonsynonymous	11330
3172	LTEE	Ara-1	50000	REL11330	A	point-mutator	SNP	1948158	1948158	1597	1948158	A&rarr;C	<font class=snp_type_nonsynonymous>S533A</font>&nbsp;(<font class=mutation_in_codon>T</font>CC&rarr;<font class=mutation_in_codon>G</font>CC)&nbsp;	tap	tap	<i>tap</i>&nbsp;&larr;	methyl-accepting protein IV	methyl&#8209;accepting protein IV	ECB_01856	snp_nonsynonymous	nonsynonymous	11330
3173	LTEE	Ara-1	50000	REL11330	A	point-mutator	SNP	1948707	1948707	1048	1948707	T&rarr;G	<font class=snp_type_nonsynonymous>I350L</font>&nbsp;(<font class=mutation_in_codon>A</font>TC&rarr;<font class=mutation_in_codon>C</font>TC)&nbsp;	tap	tap	<i>tap</i>&nbsp;&larr;	methyl-accepting protein IV	methyl&#8209;accepting protein IV	ECB_01856	snp_nonsynonymous	nonsynonymous	11330
3174	LTEE	Ara-1	50000	REL11330	A	point-mutator	SNP	1955569	1955569	341	1955569	G&rarr;T	<font class=snp_type_nonsynonymous>P114Q</font>&nbsp;(C<font class=mutation_in_codon>C</font>A&rarr;C<font class=mutation_in_codon>A</font>A)&nbsp;	motA	motA	<i>motA</i>&nbsp;&larr;	flagellar motor protein MotA	flagellar motor protein MotA	ECB_01861	snp_nonsynonymous	nonsynonymous	11330
3175	LTEE	Ara-1	50000	REL11330	A	point-mutator	SNP	1962361	1962361	703	1962361	C&rarr;A	<font class=snp_type_nonsynonymous>A235S</font>&nbsp;(<font class=mutation_in_codon>G</font>CG&rarr;<font class=mutation_in_codon>T</font>CG)&nbsp;	araG	araG	<i>araG</i>&nbsp;&larr;	fused L-arabinose transporter subunits of ABC superfamily: ATP-binding components	fused L&#8209;arabinose transporter subunits of ABC superfamily: ATP&#8209;binding components	ECB_01868	snp_nonsynonymous	nonsynonymous	11330
3176	LTEE	Ara-1	50000	REL11330	A	point-mutator	SNP	1966779	1966779	69	1966779	T&rarr;G	<font class=snp_type_synonymous>L23L</font>&nbsp;(CT<font class=mutation_in_codon>T</font>&rarr;CT<font class=mutation_in_codon>G</font>)&nbsp;	ftn	ftn	<i>ftn</i>&nbsp;&rarr;	ferritin iron storage protein (cytoplasmic)	ferritin iron storage protein (cytoplasmic)	ECB_01873	snp_synonymous	synonymous	11330
3177	LTEE	Ara-1	50000	REL11330	A	point-mutator	SNP	1972086	1972086	548	1972086	T&rarr;G	<font class=snp_type_nonsynonymous>Q183P</font>&nbsp;(C<font class=mutation_in_codon>A</font>G&rarr;C<font class=mutation_in_codon>C</font>G)&nbsp;	uvrC	uvrC	<i>uvrC</i>&nbsp;&larr;	excinuclease ABC subunit C	excinuclease ABC subunit C	ECB_01878	snp_nonsynonymous	nonsynonymous	11330
3178	LTEE	Ara-1	50000	REL11330	A	point-mutator	SNP	1972702	1972702	504	1972702	A&rarr;C	<font class=snp_type_nonsynonymous>S168R</font>&nbsp;(AG<font class=mutation_in_codon>T</font>&rarr;AG<font class=mutation_in_codon>G</font>)&nbsp;	uvrY	uvrY	<i>uvrY</i>&nbsp;&larr;	response regulator	response regulator	ECB_01879	snp_nonsynonymous	nonsynonymous	11330
3179	LTEE	Ara-1	50000	REL11330	A	point-mutator	SNP	1976045	1976045	107	1976045	T&rarr;G	<font class=snp_type_nonsynonymous>E36A</font>&nbsp;(G<font class=mutation_in_codon>A</font>G&rarr;G<font class=mutation_in_codon>C</font>G)&nbsp;	yedV	yedV	<i>yedV</i>&nbsp;&larr;	predicted sensory kinase in two-component regulatory system with YedW	predicted sensory kinase in two&#8209;component regulatory system with YedW	ECB_01883	snp_nonsynonymous	nonsynonymous	11330
3180	LTEE	Ara-1	50000	REL11330	A	point-mutator	SNP	1976879	1976879	intergenic (-57/-76)	1976879	T&rarr;G	intergenic&nbsp;(&#8209;57/&#8209;76)	yedW,yedX	yedW/yedX	<i>yedW</i>&nbsp;&larr;&nbsp;/&nbsp;&rarr;&nbsp;<i>yedX</i>	predicted DNA-binding response regulator in two-component system with YedV/hypothetical protein	predicted DNA&#8209;binding response regulator in two&#8209;component system with YedV/hypothetical protein	ECB_01884/ECB_01885	snp_intergenic	intergenic	11330
3181	LTEE	Ara-1	50000	REL11330	A	point-mutator	SNP	1983314	1983314	453	1983314	A&rarr;C	<font class=snp_type_nonsynonymous>L151F</font>&nbsp;(TT<font class=mutation_in_codon>A</font>&rarr;TT<font class=mutation_in_codon>C</font>)&nbsp;	yeeJ	yeeJ	<i>yeeJ</i>&nbsp;&rarr;	adhesin	adhesin	ECB_01891	snp_nonsynonymous	nonsynonymous	11330
3182	LTEE	Ara-1	50000	REL11330	A	point-mutator	SNP	1986212	1986212	3351	1986212	T&rarr;G	<font class=snp_type_nonsynonymous>F1117L</font>&nbsp;(TT<font class=mutation_in_codon>T</font>&rarr;TT<font class=mutation_in_codon>G</font>)&nbsp;	yeeJ	yeeJ	<i>yeeJ</i>&nbsp;&rarr;	adhesin	adhesin	ECB_01891	snp_nonsynonymous	nonsynonymous	11330
3183	LTEE	Ara-1	50000	REL11330	A	point-mutator	SNP	1987947	1987947	5086	1987947	T&rarr;G	<font class=snp_type_nonsynonymous>S1696A</font>&nbsp;(<font class=mutation_in_codon>T</font>CT&rarr;<font class=mutation_in_codon>G</font>CT)&nbsp;	yeeJ	yeeJ	<i>yeeJ</i>&nbsp;&rarr;	adhesin	adhesin	ECB_01891	snp_nonsynonymous	nonsynonymous	11330
3184	LTEE	Ara-1	50000	REL11330	A	point-mutator	SNP	1992661	1992661	1020	1992661	A&rarr;C	<font class=snp_type_nonsynonymous>Q340H</font>&nbsp;(CA<font class=mutation_in_codon>A</font>&rarr;CA<font class=mutation_in_codon>C</font>)&nbsp;	shiA	shiA	<i>shiA</i>&nbsp;&rarr;	shikimate transporter	shikimate transporter	ECB_01893	snp_nonsynonymous	nonsynonymous	11330
3185	LTEE	Ara-1	50000	REL11330	A	point-mutator	SNP	1998375	1998375	540	1998375	T&rarr;G	<font class=snp_type_nonsynonymous>Q180H</font>&nbsp;(CA<font class=mutation_in_codon>A</font>&rarr;CA<font class=mutation_in_codon>C</font>)&nbsp;	cbl	cbl	<i>cbl</i>&nbsp;&larr;	DNA-binding transcriptional activator of cysteine biosynthesis	DNA&#8209;binding transcriptional activator of cysteine biosynthesis	ECB_01897	snp_nonsynonymous	nonsynonymous	11330
3186	LTEE	Ara-1	50000	REL11330	A	point-mutator	SNP	2003886	2003886	intergenic (-122/-1550)	2003886	A&rarr;C	intergenic&nbsp;(&#8209;122/&#8209;1550)	cobU,yoeA	cobU/yoeA	<i>cobU</i>&nbsp;&larr;&nbsp;/&nbsp;&rarr;&nbsp;<i>yoeA</i>	adenosylcobinamide kinase/adenosylcobinamide-phosphate guanylyltransferase/b1995(b4582); putative hemine receptor	adenosylcobinamide kinase/adenosylcobinamide&#8209;phosphate guanylyltransferase/b1995(b4582); putative hemine receptor	ECB_01902/ECB_01903	snp_intergenic	intergenic	11330
3187	LTEE	Ara-1	50000	REL11330	A	point-mutator	SNP	2010638	2010638	397	2010638	A&rarr;C	<font class=snp_type_nonsynonymous>S133A</font>&nbsp;(<font class=mutation_in_codon>T</font>CC&rarr;<font class=mutation_in_codon>G</font>CC)&nbsp;	yeeA	yeeA	<i>yeeA</i>&nbsp;&larr;	conserved inner membrane protein	conserved inner membrane protein	ECB_01911	snp_nonsynonymous	nonsynonymous	11330
3188	LTEE	Ara-1	50000	REL11330	A	point-mutator	SNP	2010682	2010682	353	2010682	T&rarr;G	<font class=snp_type_nonsynonymous>Y118S</font>&nbsp;(T<font class=mutation_in_codon>A</font>T&rarr;T<font class=mutation_in_codon>C</font>T)&nbsp;	yeeA	yeeA	<i>yeeA</i>&nbsp;&larr;	conserved inner membrane protein	conserved inner membrane protein	ECB_01911	snp_nonsynonymous	nonsynonymous	11330
3189	LTEE	Ara-1	50000	REL11330	A	point-mutator	SNP	2016160	2016160	1346	2016160	T&rarr;G	<font class=snp_type_nonsynonymous>E449A</font>&nbsp;(G<font class=mutation_in_codon>A</font>A&rarr;G<font class=mutation_in_codon>C</font>A)&nbsp;	yeeF	yeeF	<i>yeeF</i>&nbsp;&larr;	predicted amino-acid transporter	predicted amino&#8209;acid transporter	ECB_01917	snp_nonsynonymous	nonsynonymous	11330
3190	LTEE	Ara-1	50000	REL11330	A	point-mutator	SNP	2022426	2022426	27	2022426	A&rarr;C	<font class=snp_type_nonsynonymous>L9F</font>&nbsp;(TT<font class=mutation_in_codon>A</font>&rarr;TT<font class=mutation_in_codon>C</font>)&nbsp;	hisC	hisC	<i>hisC</i>&nbsp;&rarr;	histidinol-phosphate aminotransferase	histidinol&#8209;phosphate aminotransferase	ECB_01923	snp_nonsynonymous	nonsynonymous	11330
3191	LTEE	Ara-1	50000	REL11330	A	point-mutator	SNP	2024547	2024547	11	2024547	T&rarr;G	<font class=snp_type_nonsynonymous>V4G</font>&nbsp;(G<font class=mutation_in_codon>T</font>G&rarr;G<font class=mutation_in_codon>G</font>G)&nbsp;	hisH	hisH	<i>hisH</i>&nbsp;&rarr;	imidazole glycerol phosphate synthase subunit HisH	imidazole glycerol phosphate synthase subunit HisH	ECB_01925	snp_nonsynonymous	nonsynonymous	11330
3192	LTEE	Ara-1	50000	REL11330	A	point-mutator	SNP	2027918	2027918	389	2027918	T&rarr;G	<font class=snp_type_nonsynonymous>Q130P</font>&nbsp;(C<font class=mutation_in_codon>A</font>A&rarr;C<font class=mutation_in_codon>C</font>A)&nbsp;	wzzB	wzzB	<i>wzzB</i>&nbsp;&larr;	regulator of length of O-antigen component of lipopolysaccharide chains	regulator of length of O&#8209;antigen component of lipopolysaccharide chains	ECB_01929	snp_nonsynonymous	nonsynonymous	11330
3193	LTEE	Ara-1	50000	REL11330	A	point-mutator	SNP	2028863	2028863	753	2028863	A&rarr;G	<font class=snp_type_synonymous>G251G</font>&nbsp;(GG<font class=mutation_in_codon>T</font>&rarr;GG<font class=mutation_in_codon>C</font>)&nbsp;	ugd	ugd	<i>ugd</i>&nbsp;&larr;	UDP-glucose 6-dehydrogenase	UDP&#8209;glucose 6&#8209;dehydrogenase	ECB_01930	snp_synonymous	synonymous	11330
3194	LTEE	Ara-1	50000	REL11330	A	point-mutator	DEL	2031703	2054995	NA	2031703	&Delta;23,293&nbsp;bp	NA	[manB],manC,insB-14,insA-14,wbbD,wbbC,wzy,wbbB,wbbA,vioB,vioA,wzx,rmlC,rfbA,rfbD,rfbB,galF,wcaM,wcaL,wcaK,wzxC,wcaJ,[cpsG]	[manB]–[cpsG]	<i>[manB]</i>&#8211;<i>[cpsG]</i>	<i><b>23 genes</b><BR>[manB], manC, insB-14, insA-14, wbbD, wbbC, wzy, wbbB, wbbA, vioB, vioA, wzx, rmlC, rfbA, rfbD, rfbB, galF, wcaM, wcaL, wcaK, wzxC, wcaJ, [cpsG]</i>	<i>[manB], manC, insB&#8209;14, insA&#8209;14, wbbD, wbbC, wzy, wbbB, wbbA, vioB, vioA, wzx, rmlC, rfbA, rfbD, rfbB, galF, wcaM, wcaL, wcaK, wzxC, wcaJ, [cpsG]</i>	[ECB_01932]–[ECB_01954]	large_deletion	not_snp	11330
3195	LTEE	Ara-1	50000	REL11330	A	point-mutator	SNP	2060979	2060979	541	2060979	T&rarr;G	<font class=snp_type_nonsynonymous>N181H</font>&nbsp;(<font class=mutation_in_codon>A</font>AC&rarr;<font class=mutation_in_codon>C</font>AC)&nbsp;	gmd	gmd	<i>gmd</i>&nbsp;&larr;	GDP-D-mannose dehydratase, NAD(P)-binding	GDP&#8209;D&#8209;mannose dehydratase, NAD(P)&#8209;binding	ECB_01959	snp_nonsynonymous	nonsynonymous	11330
3196	LTEE	Ara-1	50000	REL11330	A	point-mutator	SNP	2061256	2061256	264	2061256	T&rarr;G	<font class=snp_type_synonymous>A88A</font>&nbsp;(GC<font class=mutation_in_codon>A</font>&rarr;GC<font class=mutation_in_codon>C</font>)&nbsp;	gmd	gmd	<i>gmd</i>&nbsp;&larr;	GDP-D-mannose dehydratase, NAD(P)-binding	GDP&#8209;D&#8209;mannose dehydratase, NAD(P)&#8209;binding	ECB_01959	snp_synonymous	synonymous	11330
3197	LTEE	Ara-1	50000	REL11330	A	point-mutator	SNP	2062763	2062763	94	2062763	T&rarr;G	<font class=snp_type_nonsynonymous>I32L</font>&nbsp;(<font class=mutation_in_codon>A</font>TC&rarr;<font class=mutation_in_codon>C</font>TC)&nbsp;	wcaE	wcaE	<i>wcaE</i>&nbsp;&larr;	predicted glycosyl transferase	predicted glycosyl transferase	ECB_01961	snp_nonsynonymous	nonsynonymous	11330
3198	LTEE	Ara-1	50000	REL11330	A	point-mutator	SNP	2063626	2063626	459	2063626	A&rarr;C	<font class=snp_type_nonsynonymous>I153M</font>&nbsp;(AT<font class=mutation_in_codon>T</font>&rarr;AT<font class=mutation_in_codon>G</font>)&nbsp;	wcaD	wcaD	<i>wcaD</i>&nbsp;&larr;	predicted colanic acid polymerase	predicted colanic acid polymerase	ECB_01962	snp_nonsynonymous	nonsynonymous	11330
3199	LTEE	Ara-1	50000	REL11330	A	point-mutator	SNP	2070174	2070174	276	2070174	A&rarr;C	<font class=snp_type_synonymous>V92V</font>&nbsp;(GT<font class=mutation_in_codon>T</font>&rarr;GT<font class=mutation_in_codon>G</font>)&nbsp;	wza	wza	<i>wza</i>&nbsp;&larr;	lipoprotein required for capsular polysaccharide translocation through the outer membrane	lipoprotein required for capsular polysaccharide translocation through the outer membrane	ECB_01968	snp_synonymous	synonymous	11330
3200	LTEE	Ara-1	50000	REL11330	A	point-mutator	SNP	2070879	2070879	intergenic (-430/-229)	2070879	T&rarr;G	intergenic&nbsp;(&#8209;430/&#8209;229)	wza,yegH	wza/yegH	<i>wza</i>&nbsp;&larr;&nbsp;/&nbsp;&rarr;&nbsp;<i>yegH</i>	lipoprotein required for capsular polysaccharide translocation through the outer membrane/fused predicted membrane protein/predicted membrane protein	lipoprotein required for capsular polysaccharide translocation through the outer membrane/fused predicted membrane protein/predicted membrane protein	ECB_01968/ECB_01969	snp_intergenic	intergenic	11330
3201	LTEE	Ara-1	50000	REL11330	A	point-mutator	SNP	2073796	2073796	1023	2073796	A&rarr;C	<font class=snp_type_synonymous>A341A</font>&nbsp;(GC<font class=mutation_in_codon>T</font>&rarr;GC<font class=mutation_in_codon>G</font>)&nbsp;	asmA	asmA	<i>asmA</i>&nbsp;&larr;	predicted assembly protein	predicted assembly protein	ECB_01970	snp_synonymous	synonymous	11330
3202	LTEE	Ara-1	50000	REL11330	A	point-mutator	SNP	2079706	2079706	3235	2079706	T&rarr;G	<font class=snp_type_nonsynonymous>Y1079D</font>&nbsp;(<font class=mutation_in_codon>T</font>AT&rarr;<font class=mutation_in_codon>G</font>AT)&nbsp;	yegE	yegE	<i>yegE</i>&nbsp;&rarr;	predicted diguanylate cyclase, GGDEF domain signalling protein	predicted diguanylate cyclase, GGDEF domain signalling protein	ECB_01973	snp_nonsynonymous	nonsynonymous	11330
3203	LTEE	Ara-1	50000	REL11330	A	point-mutator	SNP	2081023	2081023	164	2081023	A&rarr;C	<font class=snp_type_nonsynonymous>D55A</font>&nbsp;(G<font class=mutation_in_codon>A</font>T&rarr;G<font class=mutation_in_codon>C</font>T)&nbsp;	yegD	yegD	<i>yegD</i>&nbsp;&rarr;	predicted chaperone	predicted chaperone	ECB_01975	snp_nonsynonymous	nonsynonymous	11330
3204	LTEE	Ara-1	50000	REL11330	A	point-mutator	SNP	2082685	2082685	1481	2082685	G&rarr;A	<font class=snp_type_nonsynonymous>A494V</font>&nbsp;(G<font class=mutation_in_codon>C</font>T&rarr;G<font class=mutation_in_codon>T</font>T)&nbsp;	yegI	yegI	<i>yegI</i>&nbsp;&larr;	hypothetical protein	hypothetical protein	ECB_01976	snp_nonsynonymous	nonsynonymous	11330
3205	LTEE	Ara-1	50000	REL11330	A	point-mutator	SNP	2083327	2083327	839	2083327	T&rarr;G	<font class=snp_type_nonsynonymous>E280A</font>&nbsp;(G<font class=mutation_in_codon>A</font>A&rarr;G<font class=mutation_in_codon>C</font>A)&nbsp;	yegI	yegI	<i>yegI</i>&nbsp;&larr;	hypothetical protein	hypothetical protein	ECB_01976	snp_nonsynonymous	nonsynonymous	11330
3206	LTEE	Ara-1	50000	REL11330	A	point-mutator	SNP	2084094	2084094	72	2084094	T&rarr;G	<font class=snp_type_nonsynonymous>E24D</font>&nbsp;(GA<font class=mutation_in_codon>A</font>&rarr;GA<font class=mutation_in_codon>C</font>)&nbsp;	yegI	yegI	<i>yegI</i>&nbsp;&larr;	hypothetical protein	hypothetical protein	ECB_01976	snp_nonsynonymous	nonsynonymous	11330
3207	LTEE	Ara-1	50000	REL11330	A	point-mutator	SNP	2086020	2086020	intergenic (-441/-1104)	2086020	A&rarr;C	intergenic&nbsp;(&#8209;441/&#8209;1104)	yegL,yegM	yegL/yegM	<i>yegL</i>&nbsp;&larr;&nbsp;/&nbsp;&rarr;&nbsp;<i>yegM</i>	hypothetical protein/multidrug efflux system, subunit A	hypothetical protein/multidrug efflux system, subunit A	ECB_01978/ECB_01979	snp_intergenic	intergenic	11330
3208	LTEE	Ara-1	50000	REL11330	A	point-mutator	SNP	2086115	2086115	intergenic (-536/-1009)	2086115	T&rarr;G	intergenic&nbsp;(&#8209;536/&#8209;1009)	yegL,yegM	yegL/yegM	<i>yegL</i>&nbsp;&larr;&nbsp;/&nbsp;&rarr;&nbsp;<i>yegM</i>	hypothetical protein/multidrug efflux system, subunit A	hypothetical protein/multidrug efflux system, subunit A	ECB_01978/ECB_01979	snp_intergenic	intergenic	11330
3209	LTEE	Ara-1	50000	REL11330	A	point-mutator	SNP	2086607	2086607	intergenic (-1028/-517)	2086607	T&rarr;G	intergenic&nbsp;(&#8209;1028/&#8209;517)	yegL,yegM	yegL/yegM	<i>yegL</i>&nbsp;&larr;&nbsp;/&nbsp;&rarr;&nbsp;<i>yegM</i>	hypothetical protein/multidrug efflux system, subunit A	hypothetical protein/multidrug efflux system, subunit A	ECB_01978/ECB_01979	snp_intergenic	intergenic	11330
3210	LTEE	Ara-1	50000	REL11330	A	point-mutator	INS	2103918	2103918	coding (185/216 nt)	2103918	(CCAG)<sub>7&rarr;11</sub>	coding&nbsp;(185/216&nbsp;nt)	ECB_01992	ECB_01992	<i>ECB_01992</i>&nbsp;&rarr;	hypothetical protein	hypothetical protein	ECB_01992	small_indel	not_snp	11330
3211	LTEE	Ara-1	50000	REL11330	A	point-mutator	SNP	2105404	2105404	2610	2105404	A&rarr;C	<font class=snp_type_synonymous>V870V</font>&nbsp;(GT<font class=mutation_in_codon>T</font>&rarr;GT<font class=mutation_in_codon>G</font>)&nbsp;	ECB_01994	ECB_01994	<i>ECB_01994</i>&nbsp;&larr;	hypothetical protein	hypothetical protein	ECB_01994	snp_synonymous	synonymous	11330
3212	LTEE	Ara-1	50000	REL11330	A	point-mutator	SNP	2107716	2107716	298	2107716	T&rarr;G	<font class=snp_type_nonsynonymous>S100R</font>&nbsp;(<font class=mutation_in_codon>A</font>GT&rarr;<font class=mutation_in_codon>C</font>GT)&nbsp;	ECB_01994	ECB_01994	<i>ECB_01994</i>&nbsp;&larr;	hypothetical protein	hypothetical protein	ECB_01994	snp_nonsynonymous	nonsynonymous	11330
3213	LTEE	Ara-1	50000	REL11330	A	point-mutator	SNP	2111668	2111668	229	2111668	T&rarr;G	<font class=snp_type_nonsynonymous>F77V</font>&nbsp;(<font class=mutation_in_codon>T</font>TT&rarr;<font class=mutation_in_codon>G</font>TT)&nbsp;	ECB_02000	ECB_02000	<i>ECB_02000</i>&nbsp;&rarr;	bacteriophage capsid portal protein	bacteriophage capsid portal protein	ECB_02000	snp_nonsynonymous	nonsynonymous	11330
3214	LTEE	Ara-1	50000	REL11330	A	point-mutator	SNP	2112167	2112167	728	2112167	A&rarr;C	<font class=snp_type_nonsynonymous>K243T</font>&nbsp;(A<font class=mutation_in_codon>A</font>A&rarr;A<font class=mutation_in_codon>C</font>A)&nbsp;	ECB_02000	ECB_02000	<i>ECB_02000</i>&nbsp;&rarr;	bacteriophage capsid portal protein	bacteriophage capsid portal protein	ECB_02000	snp_nonsynonymous	nonsynonymous	11330
3215	LTEE	Ara-1	50000	REL11330	A	point-mutator	SNP	2131584	2131584	intergenic (-243/+57)	2131584	A&rarr;C	intergenic&nbsp;(&#8209;243/+57)	gatY,fbaB	gatY/fbaB	<i>gatY</i>&nbsp;&larr;&nbsp;/&nbsp;&larr;&nbsp;<i>fbaB</i>	D-tagatose 1,6-bisphosphate aldolase 2, catalytic subunit/fructose-bisphosphate aldolase	D&#8209;tagatose 1,6&#8209;bisphosphate aldolase 2, catalytic subunit/fructose&#8209;bisphosphate aldolase	ECB_02024/ECB_02025	snp_intergenic	intergenic	11330
3216	LTEE	Ara-1	50000	REL11330	A	point-mutator	SNP	2135826	2135826	602	2135826	T&rarr;G	<font class=snp_type_nonsynonymous>L201R</font>&nbsp;(C<font class=mutation_in_codon>T</font>C&rarr;C<font class=mutation_in_codon>G</font>C)&nbsp;	yegV	yegV	<i>yegV</i>&nbsp;&rarr;	predicted kinase	predicted kinase	ECB_02028	snp_nonsynonymous	nonsynonymous	11330
3217	LTEE	Ara-1	50000	REL11330	A	point-mutator	SNP	2136607	2136607	304	2136607	A&rarr;C	<font class=snp_type_nonsynonymous>S102A</font>&nbsp;(<font class=mutation_in_codon>T</font>CT&rarr;<font class=mutation_in_codon>G</font>CT)&nbsp;	yegW	yegW	<i>yegW</i>&nbsp;&larr;	predicted DNA-binding transcriptional regulator	predicted DNA&#8209;binding transcriptional regulator	ECB_02029	snp_nonsynonymous	nonsynonymous	11330
3218	LTEE	Ara-1	50000	REL11330	A	point-mutator	SNP	2145923	2145923	427	2145923	A&rarr;C	<font class=snp_type_nonsynonymous>K143Q</font>&nbsp;(<font class=mutation_in_codon>A</font>AA&rarr;<font class=mutation_in_codon>C</font>AA)&nbsp;	metG	metG	<i>metG</i>&nbsp;&rarr;	methionyl-tRNA synthetase	methionyl&#8209;tRNA synthetase	ECB_02044	snp_nonsynonymous	nonsynonymous	11330
3219	LTEE	Ara-1	50000	REL11330	A	point-mutator	SNP	2146981	2146981	1485	2146981	A&rarr;C	<font class=snp_type_synonymous>V495V</font>&nbsp;(GT<font class=mutation_in_codon>A</font>&rarr;GT<font class=mutation_in_codon>C</font>)&nbsp;	metG	metG	<i>metG</i>&nbsp;&rarr;	methionyl-tRNA synthetase	methionyl&#8209;tRNA synthetase	ECB_02044	snp_synonymous	synonymous	11330
3220	LTEE	Ara-1	50000	REL11330	A	point-mutator	SNP	2149904	2149904	2234	2149904	T&rarr;G	<font class=snp_type_nonsense>L745*</font>&nbsp;(T<font class=mutation_in_codon>T</font>A&rarr;T<font class=mutation_in_codon>G</font>A)&nbsp;	molR	molR	<i>molR</i>&nbsp;&rarr;	molybdate metabolism regulator	molybdate metabolism regulator	ECB_02045	snp_nonsense	nonsense	11330
3221	LTEE	Ara-1	50000	REL11330	A	point-mutator	SNP	2150271	2150271	2601	2150271	T&rarr;G	<font class=snp_type_synonymous>V867V</font>&nbsp;(GT<font class=mutation_in_codon>T</font>&rarr;GT<font class=mutation_in_codon>G</font>)&nbsp;	molR	molR	<i>molR</i>&nbsp;&rarr;	molybdate metabolism regulator	molybdate metabolism regulator	ECB_02045	snp_synonymous	synonymous	11330
3222	LTEE	Ara-1	50000	REL11330	A	point-mutator	SNP	2151897	2151897	423	2151897	A&rarr;C	<font class=snp_type_synonymous>V141V</font>&nbsp;(GT<font class=mutation_in_codon>A</font>&rarr;GT<font class=mutation_in_codon>C</font>)&nbsp;	yehI	yehI	<i>yehI</i>&nbsp;&rarr;	hypothetical protein	hypothetical protein	ECB_02046	snp_synonymous	synonymous	11330
3223	LTEE	Ara-1	50000	REL11330	A	point-mutator	SNP	2155555	2155555	intergenic (+70/-237)	2155555	T&rarr;G	intergenic&nbsp;(+70/&#8209;237)	yehK,yehL	yehK/yehL	<i>yehK</i>&nbsp;&rarr;&nbsp;/&nbsp;&rarr;&nbsp;<i>yehL</i>	hypothetical protein/predicted transporter subunit: ATP-binding component of ABC superfamily	hypothetical protein/predicted transporter subunit: ATP&#8209;binding component of ABC superfamily	ECB_02047/ECB_02048	snp_intergenic	intergenic	11330
3224	LTEE	Ara-1	50000	REL11330	A	point-mutator	SNP	2158593	2158593	1703	2158593	T&rarr;G	<font class=snp_type_nonsynonymous>F568C</font>&nbsp;(T<font class=mutation_in_codon>T</font>T&rarr;T<font class=mutation_in_codon>G</font>T)&nbsp;	yehM	yehM	<i>yehM</i>&nbsp;&rarr;	hypothetical protein	hypothetical protein	ECB_02049	snp_nonsynonymous	nonsynonymous	11330
3225	LTEE	Ara-1	50000	REL11330	A	point-mutator	SNP	2160319	2160319	24	2160319	A&rarr;C	<font class=snp_type_nonsynonymous>L8F</font>&nbsp;(TT<font class=mutation_in_codon>A</font>&rarr;TT<font class=mutation_in_codon>C</font>)&nbsp;	yehQ	yehQ	<i>yehQ</i>&nbsp;&rarr;	hypothetical protein	hypothetical protein	ECB_02051	snp_nonsynonymous	nonsynonymous	11330
3226	LTEE	Ara-1	50000	REL11330	A	point-mutator	SNP	2167121	2167121	553	2167121	T&rarr;G	<font class=snp_type_nonsynonymous>T185P</font>&nbsp;(<font class=mutation_in_codon>A</font>CG&rarr;<font class=mutation_in_codon>C</font>CG)&nbsp;	yehW	yehW	<i>yehW</i>&nbsp;&larr;	predicted transporter subunit: membrane component of ABC superfamily	predicted transporter subunit: membrane component of ABC superfamily	ECB_02058	snp_nonsynonymous	nonsynonymous	11330
3227	LTEE	Ara-1	50000	REL11330	A	point-mutator	SNP	2168655	2168655	1100	2168655	A&rarr;C	<font class=snp_type_nonsynonymous>L367R</font>&nbsp;(C<font class=mutation_in_codon>T</font>T&rarr;C<font class=mutation_in_codon>G</font>T)&nbsp;	yehY	yehY	<i>yehY</i>&nbsp;&larr;	predicted transporter subunit: membrane component of ABC superfamily	predicted transporter subunit: membrane component of ABC superfamily	ECB_02060	snp_nonsynonymous	nonsynonymous	11330
3228	LTEE	Ara-1	50000	REL11330	A	point-mutator	SNP	2181152	2181152	473	2181152	T&rarr;G	<font class=snp_type_nonsynonymous>Q158P</font>&nbsp;(C<font class=mutation_in_codon>A</font>A&rarr;C<font class=mutation_in_codon>C</font>A)&nbsp;	yohI	yohI	<i>yohI</i>&nbsp;&larr;	tRNA-dihydrouridine synthase C	tRNA&#8209;dihydrouridine synthase C	ECB_02069	snp_nonsynonymous	nonsynonymous	11330
3229	LTEE	Ara-1	50000	REL11330	A	point-mutator	SNP	2181209	2181209	416	2181209	T&rarr;G	<font class=snp_type_nonsynonymous>K139T</font>&nbsp;(A<font class=mutation_in_codon>A</font>A&rarr;A<font class=mutation_in_codon>C</font>A)&nbsp;	yohI	yohI	<i>yohI</i>&nbsp;&larr;	tRNA-dihydrouridine synthase C	tRNA&#8209;dihydrouridine synthase C	ECB_02069	snp_nonsynonymous	nonsynonymous	11330
3230	LTEE	Ara-1	50000	REL11330	A	point-mutator	SNP	2189244	2189244	1284	2189244	T&rarr;G	<font class=snp_type_nonsynonymous>L428F</font>&nbsp;(TT<font class=mutation_in_codon>A</font>&rarr;TT<font class=mutation_in_codon>C</font>)&nbsp;	mglA	mglA	<i>mglA</i>&nbsp;&larr;	fused methyl-galactoside transporter subunits of ABC superfamily: ATP-binding components	fused methyl&#8209;galactoside transporter subunits of ABC superfamily: ATP&#8209;binding components	ECB_02078	snp_nonsynonymous	nonsynonymous	11330
3231	LTEE	Ara-1	50000	REL11330	A	point-mutator	SNP	2189980	2189980	548	2189980	T&rarr;G	<font class=snp_type_nonsynonymous>K183T</font>&nbsp;(A<font class=mutation_in_codon>A</font>A&rarr;A<font class=mutation_in_codon>C</font>A)&nbsp;	mglA	mglA	<i>mglA</i>&nbsp;&larr;	fused methyl-galactoside transporter subunits of ABC superfamily: ATP-binding components	fused methyl&#8209;galactoside transporter subunits of ABC superfamily: ATP&#8209;binding components	ECB_02078	snp_nonsynonymous	nonsynonymous	11330
3232	LTEE	Ara-1	50000	REL11330	A	point-mutator	SNP	2192691	2192691	216	2192691	A&rarr;C	<font class=snp_type_synonymous>A72A</font>&nbsp;(GC<font class=mutation_in_codon>T</font>&rarr;GC<font class=mutation_in_codon>G</font>)&nbsp;	galS	galS	<i>galS</i>&nbsp;&larr;	DNA-binding transcriptional repressor	DNA&#8209;binding transcriptional repressor	ECB_02080	snp_synonymous	synonymous	11330
3233	LTEE	Ara-1	50000	REL11330	A	point-mutator	SNP	2192971	2192971	intergenic (-65/+77)	2192971	A&rarr;C	intergenic&nbsp;(&#8209;65/+77)	galS,yeiB	galS/yeiB	<i>galS</i>&nbsp;&larr;&nbsp;/&nbsp;&larr;&nbsp;<i>yeiB</i>	DNA-binding transcriptional repressor/conserved inner membrane protein	DNA&#8209;binding transcriptional repressor/conserved inner membrane protein	ECB_02080/ECB_02081	snp_intergenic	intergenic	11330
3234	LTEE	Ara-1	50000	REL11330	A	point-mutator	SNP	2201029	2201029	75	2201029	T&rarr;G	<font class=snp_type_synonymous>V25V</font>&nbsp;(GT<font class=mutation_in_codon>T</font>&rarr;GT<font class=mutation_in_codon>G</font>)&nbsp;	yeiH	yeiH	<i>yeiH</i>&nbsp;&rarr;	conserved inner membrane protein	conserved inner membrane protein	ECB_02087	snp_synonymous	synonymous	11330
3235	LTEE	Ara-1	50000	REL11330	A	point-mutator	SNP	2201070	2201070	116	2201070	T&rarr;G	<font class=snp_type_nonsynonymous>V39G</font>&nbsp;(G<font class=mutation_in_codon>T</font>T&rarr;G<font class=mutation_in_codon>G</font>T)&nbsp;	yeiH	yeiH	<i>yeiH</i>&nbsp;&rarr;	conserved inner membrane protein	conserved inner membrane protein	ECB_02087	snp_nonsynonymous	nonsynonymous	11330
3236	LTEE	Ara-1	50000	REL11330	A	point-mutator	SNP	2204048	2204048	intergenic (+22/+34)	2204048	T&rarr;G	intergenic&nbsp;(+22/+34)	yeiI,yeiJ	yeiI/yeiJ	<i>yeiI</i>&nbsp;&rarr;&nbsp;/&nbsp;&larr;&nbsp;<i>yeiJ</i>	predicted kinase/predicted nucleoside transporter	predicted kinase/predicted nucleoside transporter	ECB_02089/ECB_02090	snp_intergenic	intergenic	11330
3237	LTEE	Ara-1	50000	REL11330	A	point-mutator	SNP	2214226	2214226	458	2214226	T&rarr;G	<font class=snp_type_nonsynonymous>E153A</font>&nbsp;(G<font class=mutation_in_codon>A</font>A&rarr;G<font class=mutation_in_codon>C</font>A)&nbsp;	fruB	fruB	<i>fruB</i>&nbsp;&larr;	fused fructose-specific PTS enzymes: IIA component/HPr component	fused fructose&#8209;specific PTS enzymes: IIA component/HPr component	ECB_02098	snp_nonsynonymous	nonsynonymous	11330
3238	LTEE	Ara-1	50000	REL11330	A	point-mutator	SNP	2219224	2219224	208	2219224	T&rarr;G	<font class=snp_type_nonsynonymous>L70V</font>&nbsp;(<font class=mutation_in_codon>T</font>TA&rarr;<font class=mutation_in_codon>G</font>TA)&nbsp;	yeiR	yeiR	<i>yeiR</i>&nbsp;&rarr;	predicted enzyme	predicted enzyme	ECB_02103	snp_nonsynonymous	nonsynonymous	11330
3239	LTEE	Ara-1	50000	REL11330	A	point-mutator	SNP	2223836	2223836	285	2223836	A&rarr;C	<font class=snp_type_synonymous>P95P</font>&nbsp;(CC<font class=mutation_in_codon>A</font>&rarr;CC<font class=mutation_in_codon>C</font>)&nbsp;	yejA	yejA	<i>yejA</i>&nbsp;&rarr;	predicted oligopeptide transporter subunit	predicted oligopeptide transporter subunit	ECB_02107	snp_synonymous	synonymous	11330
3240	LTEE	Ara-1	50000	REL11330	A	point-mutator	SNP	2226991	2226991	531	2226991	A&rarr;C	<font class=snp_type_nonsynonymous>Q177H</font>&nbsp;(CA<font class=mutation_in_codon>A</font>&rarr;CA<font class=mutation_in_codon>C</font>)&nbsp;	yejE	yejE	<i>yejE</i>&nbsp;&rarr;	predicted oligopeptide transporter subunit	predicted oligopeptide transporter subunit	ECB_02109	snp_nonsynonymous	nonsynonymous	11330
3241	LTEE	Ara-1	50000	REL11330	A	point-mutator	SNP	2227273	2227273	813	2227273	T&rarr;G	<font class=snp_type_nonsynonymous>S271R</font>&nbsp;(AG<font class=mutation_in_codon>T</font>&rarr;AG<font class=mutation_in_codon>G</font>)&nbsp;	yejE	yejE	<i>yejE</i>&nbsp;&rarr;	predicted oligopeptide transporter subunit	predicted oligopeptide transporter subunit	ECB_02109	snp_nonsynonymous	nonsynonymous	11330
3242	LTEE	Ara-1	50000	REL11330	A	point-mutator	SNP	2229500	2229500	intergenic (-75/+258)	2229500	T&rarr;G	intergenic&nbsp;(&#8209;75/+258)	yejG,bcr	yejG/bcr	<i>yejG</i>&nbsp;&larr;&nbsp;/&nbsp;&larr;&nbsp;<i>bcr</i>	hypothetical protein/bicyclomycin/multidrug efflux system	hypothetical protein/bicyclomycin/multidrug efflux system	ECB_02111/ECB_02112	snp_intergenic	intergenic	11330
3243	LTEE	Ara-1	50000	REL11330	A	point-mutator	SNP	2230229	2230229	720	2230229	A&rarr;C	<font class=snp_type_nonsense>Y240*</font>&nbsp;(TA<font class=mutation_in_codon>T</font>&rarr;TA<font class=mutation_in_codon>G</font>)&nbsp;	bcr	bcr	<i>bcr</i>&nbsp;&larr;	bicyclomycin/multidrug efflux system	bicyclomycin/multidrug efflux system	ECB_02112	snp_nonsense	nonsense	11330
3244	LTEE	Ara-1	50000	REL11330	A	point-mutator	SNP	2231019	2231019	653	2231019	T&rarr;G	<font class=snp_type_nonsynonymous>E218A</font>&nbsp;(G<font class=mutation_in_codon>A</font>A&rarr;G<font class=mutation_in_codon>C</font>A)&nbsp;	rsuA	rsuA	<i>rsuA</i>&nbsp;&larr;	16S rRNA pseudouridylate 516 synthase	16S rRNA pseudouridylate 516 synthase	ECB_02113	snp_nonsynonymous	nonsynonymous	11330
3245	LTEE	Ara-1	50000	REL11330	A	point-mutator	SNP	2233990	2233990	intergenic (+1/+138)	2233990	T&rarr;G	intergenic&nbsp;(+1/+138)	rplY,yejK	rplY/yejK	<i>rplY</i>&nbsp;&rarr;&nbsp;/&nbsp;&larr;&nbsp;<i>yejK</i>	50S ribosomal protein L25/nucleoid-associated protein NdpA	50S ribosomal protein L25/nucleoid&#8209;associated protein NdpA	ECB_02115/ECB_02116	snp_intergenic	intergenic	11330
3246	LTEE	Ara-1	50000	REL11330	A	point-mutator	SNP	2234717	2234717	419	2234717	T&rarr;G	<font class=snp_type_nonsynonymous>Y140S</font>&nbsp;(T<font class=mutation_in_codon>A</font>T&rarr;T<font class=mutation_in_codon>C</font>T)&nbsp;	yejK	yejK	<i>yejK</i>&nbsp;&larr;	nucleoid-associated protein NdpA	nucleoid&#8209;associated protein NdpA	ECB_02116	snp_nonsynonymous	nonsynonymous	11330
3247	LTEE	Ara-1	50000	REL11330	A	point-mutator	SNP	2237327	2237327	intergenic (+3/-72)	2237327	A&rarr;C	intergenic&nbsp;(+3/&#8209;72)	yejM,proL	yejM/proL	<i>yejM</i>&nbsp;&rarr;&nbsp;/&nbsp;&rarr;&nbsp;<i>proL</i>	predicted hydrolase, inner membrane/tRNA-Pro	predicted hydrolase, inner membrane/tRNA&#8209;Pro	ECB_02118/ECB_t00037	snp_intergenic	intergenic	11330
3248	LTEE	Ara-1	50000	REL11330	A	point-mutator	SNP	2239729	2239729	360	2239729	A&rarr;C	<font class=snp_type_synonymous>A120A</font>&nbsp;(GC<font class=mutation_in_codon>T</font>&rarr;GC<font class=mutation_in_codon>G</font>)&nbsp;	yejO	yejO	<i>yejO</i>&nbsp;&larr;	predicted autotransporter outer membrane protein	predicted autotransporter outer membrane protein	ECB_02119	snp_synonymous	synonymous	11330
3249	LTEE	Ara-1	50000	REL11330	A	point-mutator	SNP	2240529	2240529	41	2240529	A&rarr;C	<font class=snp_type_nonsynonymous>D14A</font>&nbsp;(G<font class=mutation_in_codon>A</font>T&rarr;G<font class=mutation_in_codon>C</font>T)&nbsp;	narP	narP	<i>narP</i>&nbsp;&rarr;	DNA-binding response regulator in two-component regulatory system with NarQ or NarX	DNA&#8209;binding response regulator in two&#8209;component regulatory system with NarQ or NarX	ECB_02120	snp_nonsynonymous	nonsynonymous	11330
3250	LTEE	Ara-1	50000	REL11330	A	point-mutator	SNP	2242299	2242299	101	2242299	A&rarr;C	<font class=snp_type_nonsynonymous>F34C</font>&nbsp;(T<font class=mutation_in_codon>T</font>C&rarr;T<font class=mutation_in_codon>G</font>C)&nbsp;	ccmH	ccmH	<i>ccmH</i>&nbsp;&larr;	heme lyase, CcmH subunit	heme lyase, CcmH subunit	ECB_02121	snp_nonsynonymous	nonsynonymous	11330
3251	LTEE	Ara-1	50000	REL11330	A	point-mutator	SNP	2242604	2242604	350	2242604	T&rarr;G	<font class=snp_type_nonsynonymous>K117T</font>&nbsp;(A<font class=mutation_in_codon>A</font>A&rarr;A<font class=mutation_in_codon>C</font>A)&nbsp;	ccmG	ccmG	<i>ccmG</i>&nbsp;&larr;	periplasmic thioredoxin of cytochrome c-type biogenesis	periplasmic thioredoxin of cytochrome c&#8209;type biogenesis	ECB_02122	snp_nonsynonymous	nonsynonymous	11330
3252	LTEE	Ara-1	50000	REL11330	A	point-mutator	SNP	2245593	2245593	717	2245593	T&rarr;G	<font class=snp_type_synonymous>I239I</font>&nbsp;(AT<font class=mutation_in_codon>A</font>&rarr;AT<font class=mutation_in_codon>C</font>)&nbsp;	ccmC	ccmC	<i>ccmC</i>&nbsp;&larr;	heme exporter subunit	heme exporter subunit	ECB_02126	snp_synonymous	synonymous	11330
3253	LTEE	Ara-1	50000	REL11330	A	point-mutator	SNP	2247218	2247218	416	2247218	A&rarr;C	<font class=snp_type_nonsense>L139*</font>&nbsp;(T<font class=mutation_in_codon>T</font>A&rarr;T<font class=mutation_in_codon>G</font>A)&nbsp;	ccmA	ccmA	<i>ccmA</i>&nbsp;&larr;	heme exporter subunit	heme exporter subunit	ECB_02128	snp_nonsense	nonsense	11330
3254	LTEE	Ara-1	50000	REL11330	A	point-mutator	SNP	2251433	2251433	1310	2251433	T&rarr;G	<font class=snp_type_nonsynonymous>K437T</font>&nbsp;(A<font class=mutation_in_codon>A</font>A&rarr;A<font class=mutation_in_codon>C</font>A)&nbsp;	napA	napA	<i>napA</i>&nbsp;&larr;	nitrate reductase, periplasmic, large subunit	nitrate reductase, periplasmic, large subunit	ECB_02133	snp_nonsynonymous	nonsynonymous	11330
3255	LTEE	Ara-1	50000	REL11330	A	point-mutator	SNP	2257267	2257267	1453	2257267	G&rarr;T	<font class=snp_type_nonsynonymous>R485S</font>&nbsp;(<font class=mutation_in_codon>C</font>GT&rarr;<font class=mutation_in_codon>A</font>GT)&nbsp;	yojI	yojI	<i>yojI</i>&nbsp;&larr;	fused predicted multidrug transport subunits of ABC superfamily: membrane component/ATP-binding component	fused predicted multidrug transport subunits of ABC superfamily: membrane component/ATP&#8209;binding component	ECB_02138	snp_nonsynonymous	nonsynonymous	11330
3256	LTEE	Ara-1	50000	REL11330	A	point-mutator	SNP	2266908	2266908	166	2266908	A&rarr;C	<font class=snp_type_nonsynonymous>N56H</font>&nbsp;(<font class=mutation_in_codon>A</font>AC&rarr;<font class=mutation_in_codon>C</font>AC)&nbsp;	atoS	atoS	<i>atoS</i>&nbsp;&rarr;	sensory histidine kinase in two-component regulatory system with AtoC	sensory histidine kinase in two&#8209;component regulatory system with AtoC	ECB_02146	snp_nonsynonymous	nonsynonymous	11330
3257	LTEE	Ara-1	50000	REL11330	A	point-mutator	SNP	2268244	2268244	1502	2268244	A&rarr;C	<font class=snp_type_nonsynonymous>K501T</font>&nbsp;(A<font class=mutation_in_codon>A</font>A&rarr;A<font class=mutation_in_codon>C</font>A)&nbsp;	atoS	atoS	<i>atoS</i>&nbsp;&rarr;	sensory histidine kinase in two-component regulatory system with AtoC	sensory histidine kinase in two&#8209;component regulatory system with AtoC	ECB_02146	snp_nonsynonymous	nonsynonymous	11330
3258	LTEE	Ara-1	50000	REL11330	A	point-mutator	SNP	2269133	2269133	568	2269133	T&rarr;G	<font class=snp_type_nonsynonymous>S190A</font>&nbsp;(<font class=mutation_in_codon>T</font>CG&rarr;<font class=mutation_in_codon>G</font>CG)&nbsp;	atoC	atoC	<i>atoC</i>&nbsp;&rarr;	fused response regulator of ato operon, in two-component system with AtoS: response regulator/sigma54 interaction protein	fused response regulator of ato operon, in two&#8209;component system with AtoS: response regulator/sigma54 interaction protein	ECB_02147	snp_nonsynonymous	nonsynonymous	11330
3259	LTEE	Ara-1	50000	REL11330	A	point-mutator	SNP	2287651	2287651	3219	2287651	A&rarr;C	<font class=snp_type_synonymous>G1073G</font>&nbsp;(GG<font class=mutation_in_codon>T</font>&rarr;GG<font class=mutation_in_codon>G</font>)&nbsp;	yfaL	yfaL	<i>yfaL</i>&nbsp;&larr;	adhesin	adhesin	ECB_02159	snp_synonymous	synonymous	11330
3260	LTEE	Ara-1	50000	REL11330	A	point-mutator	SNP	2290343	2290343	527	2290343	T&rarr;G	<font class=snp_type_nonsynonymous>Y176S</font>&nbsp;(T<font class=mutation_in_codon>A</font>T&rarr;T<font class=mutation_in_codon>C</font>T)&nbsp;	yfaL	yfaL	<i>yfaL</i>&nbsp;&larr;	adhesin	adhesin	ECB_02159	snp_nonsynonymous	nonsynonymous	11330
3261	LTEE	Ara-1	50000	REL11330	A	point-mutator	SNP	2299062	2299062	21	2299062	T&rarr;G	<font class=snp_type_synonymous>P7P</font>&nbsp;(CC<font class=mutation_in_codon>A</font>&rarr;CC<font class=mutation_in_codon>C</font>)&nbsp;	glpT	glpT	<i>glpT</i>&nbsp;&larr;	sn-glycerol-3-phosphate transporter	sn&#8209;glycerol&#8209;3&#8209;phosphate transporter	ECB_02166	snp_synonymous	synonymous	11330
3262	LTEE	Ara-1	50000	REL11330	A	point-mutator	SNP	2303128	2303128	900	2303128	T&rarr;G	<font class=snp_type_nonsynonymous>H300Q</font>&nbsp;(CA<font class=mutation_in_codon>T</font>&rarr;CA<font class=mutation_in_codon>G</font>)&nbsp;	glpC	glpC	<i>glpC</i>&nbsp;&rarr;	sn-glycerol-3-phosphate dehydrogenase (anaerobic), small subunit	sn&#8209;glycerol&#8209;3&#8209;phosphate dehydrogenase (anaerobic), small subunit	ECB_02169	snp_nonsynonymous	nonsynonymous	11330
3263	LTEE	Ara-1	50000	REL11330	A	point-mutator	SNP	2306072	2306072	594	2306072	A&rarr;C	<font class=snp_type_nonsynonymous>D198E</font>&nbsp;(GA<font class=mutation_in_codon>T</font>&rarr;GA<font class=mutation_in_codon>G</font>)&nbsp;	yfaV	yfaV	<i>yfaV</i>&nbsp;&larr;	predicted transporter	predicted transporter	ECB_02172	snp_nonsynonymous	nonsynonymous	11330
3264	LTEE	Ara-1	50000	REL11330	A	point-mutator	SNP	2308503	2308503	222	2308503	A&rarr;C	<font class=snp_type_synonymous>G74G</font>&nbsp;(GG<font class=mutation_in_codon>T</font>&rarr;GG<font class=mutation_in_codon>G</font>)&nbsp;	yfaX	yfaX	<i>yfaX</i>&nbsp;&larr;	predicted DNA-binding transcriptional regulator	predicted DNA&#8209;binding transcriptional regulator	ECB_02174	snp_synonymous	synonymous	11330
3265	LTEE	Ara-1	50000	REL11330	A	point-mutator	SNP	2318103	2318103	683	2318103	A&rarr;C	<font class=snp_type_nonsynonymous>Q228P</font>&nbsp;(C<font class=mutation_in_codon>A</font>G&rarr;C<font class=mutation_in_codon>C</font>G)&nbsp;	arnT	arnT	<i>arnT</i>&nbsp;&rarr;	4-amino-4-deoxy-L-arabinose transferase	4&#8209;amino&#8209;4&#8209;deoxy&#8209;L&#8209;arabinose transferase	ECB_02183	snp_nonsynonymous	nonsynonymous	11330
3266	LTEE	Ara-1	50000	REL11330	A	point-mutator	SNP	2324823	2324823	950	2324823	T&rarr;G	<font class=snp_type_nonsynonymous>D317A</font>&nbsp;(G<font class=mutation_in_codon>A</font>T&rarr;G<font class=mutation_in_codon>C</font>T)&nbsp;	menD	menD	<i>menD</i>&nbsp;&larr;	2-succinyl-6-hydroxy-2, 4-cyclohexadiene-1-carboxylate synthase	2&#8209;succinyl&#8209;6&#8209;hydroxy&#8209;2, 4&#8209;cyclohexadiene&#8209;1&#8209;carboxylate synthase	ECB_02191	snp_nonsynonymous	nonsynonymous	11330
3267	LTEE	Ara-1	50000	REL11330	A	point-mutator	SNP	2335296	2335296	1270	2335296	T&rarr;G	<font class=snp_type_nonsynonymous>I424L</font>&nbsp;(<font class=mutation_in_codon>A</font>TT&rarr;<font class=mutation_in_codon>C</font>TT)&nbsp;	nuoM	nuoM	<i>nuoM</i>&nbsp;&larr;	NADH dehydrogenase subunit M	NADH dehydrogenase subunit M	ECB_02202	snp_nonsynonymous	nonsynonymous	11330
3268	LTEE	Ara-1	50000	REL11330	A	point-mutator	SNP	2341014	2341014	20	2341014	T&rarr;G	<font class=snp_type_nonsynonymous>E7A</font>&nbsp;(G<font class=mutation_in_codon>A</font>A&rarr;G<font class=mutation_in_codon>C</font>A)&nbsp;	nuoH	nuoH	<i>nuoH</i>&nbsp;&larr;	NADH dehydrogenase subunit H	NADH dehydrogenase subunit H	ECB_02207	snp_nonsynonymous	nonsynonymous	11330
3269	LTEE	Ara-1	50000	REL11330	A	point-mutator	SNP	2341199	2341199	2564	2341199	T&rarr;G	<font class=snp_type_nonsynonymous>N855T</font>&nbsp;(A<font class=mutation_in_codon>A</font>C&rarr;A<font class=mutation_in_codon>C</font>C)&nbsp;	nuoG	nuoG	<i>nuoG</i>&nbsp;&larr;	NADH dehydrogenase subunit G	NADH dehydrogenase subunit G	ECB_02208	snp_nonsynonymous	nonsynonymous	11330
3270	LTEE	Ara-1	50000	REL11330	A	point-mutator	SNP	2342242	2342242	1521	2342242	A&rarr;C	<font class=snp_type_synonymous>G507G</font>&nbsp;(GG<font class=mutation_in_codon>T</font>&rarr;GG<font class=mutation_in_codon>G</font>)&nbsp;	nuoG	nuoG	<i>nuoG</i>&nbsp;&larr;	NADH dehydrogenase subunit G	NADH dehydrogenase subunit G	ECB_02208	snp_synonymous	synonymous	11330
3271	LTEE	Ara-1	50000	REL11330	A	point-mutator	SNP	2363106	2363106	275	2363106	T&rarr;G	<font class=snp_type_nonsynonymous>Q92P</font>&nbsp;(C<font class=mutation_in_codon>A</font>A&rarr;C<font class=mutation_in_codon>C</font>A)&nbsp;	yfcE	yfcE	<i>yfcE</i>&nbsp;&larr;	phosphodiesterase	phosphodiesterase	ECB_02225	snp_nonsynonymous	nonsynonymous	11330
3272	LTEE	Ara-1	50000	REL11330	A	point-mutator	SNP	2366449	2366449	683	2366449	A&rarr;C	<font class=snp_type_nonsynonymous>F228C</font>&nbsp;(T<font class=mutation_in_codon>T</font>T&rarr;T<font class=mutation_in_codon>G</font>T)&nbsp;	yfcI	yfcI	<i>yfcI</i>&nbsp;&larr;	hypothetical protein	hypothetical protein	ECB_02230	snp_nonsynonymous	nonsynonymous	11330
3273	LTEE	Ara-1	50000	REL11330	A	point-mutator	SNP	2370058	2370058	323	2370058	T&rarr;G	<font class=snp_type_nonsynonymous>K108T</font>&nbsp;(A<font class=mutation_in_codon>A</font>A&rarr;A<font class=mutation_in_codon>C</font>A)&nbsp;	hisJ	hisJ	<i>hisJ</i>&nbsp;&larr;	histidine/lysine/arginine/ornithine transporter subunit	histidine/lysine/arginine/ornithine transporter subunit	ECB_02234	snp_nonsynonymous	nonsynonymous	11330
3274	LTEE	Ara-1	50000	REL11330	A	point-mutator	SNP	2372970	2372970	861	2372970	A&rarr;C	<font class=snp_type_nonsynonymous>I287M</font>&nbsp;(AT<font class=mutation_in_codon>T</font>&rarr;AT<font class=mutation_in_codon>G</font>)&nbsp;	purF	purF	<i>purF</i>&nbsp;&larr;	amidophosphoribosyltransferase	amidophosphoribosyltransferase	ECB_02237	snp_nonsynonymous	nonsynonymous	11330
3275	LTEE	Ara-1	50000	REL11330	A	point-mutator	SNP	2377269	2377269	250	2377269	T&rarr;G	<font class=snp_type_nonsynonymous>K84Q</font>&nbsp;(<font class=mutation_in_codon>A</font>AG&rarr;<font class=mutation_in_codon>C</font>AG)&nbsp;	accD	accD	<i>accD</i>&nbsp;&larr;	acetyl-CoA carboxylase subunit beta	acetyl&#8209;CoA carboxylase subunit beta	ECB_02241	snp_nonsynonymous	nonsynonymous	11330
3276	LTEE	Ara-1	50000	REL11330	A	point-mutator	SNP	2387986	2387986	358	2387986	A&rarr;C	<font class=snp_type_nonsynonymous>C120G</font>&nbsp;(<font class=mutation_in_codon>T</font>GC&rarr;<font class=mutation_in_codon>G</font>GC)&nbsp;	yfcM	yfcM	<i>yfcM</i>&nbsp;&larr;	hypothetical protein	hypothetical protein	ECB_02251	snp_nonsynonymous	nonsynonymous	11330
3277	LTEE	Ara-1	50000	REL11330	A	point-mutator	SNP	2388919	2388919	234	2388919	A&rarr;C	<font class=snp_type_synonymous>V78V</font>&nbsp;(GT<font class=mutation_in_codon>T</font>&rarr;GT<font class=mutation_in_codon>G</font>)&nbsp;	yfcA	yfcA	<i>yfcA</i>&nbsp;&larr;	conserved inner membrane protein	conserved inner membrane protein	ECB_02252	snp_synonymous	synonymous	11330
3278	LTEE	Ara-1	50000	REL11330	A	point-mutator	SNP	2391445	2391445	588	2391445	T&rarr;G	<font class=snp_type_nonsynonymous>L196F</font>&nbsp;(TT<font class=mutation_in_codon>A</font>&rarr;TT<font class=mutation_in_codon>C</font>)&nbsp;	yfcB	yfcB	<i>yfcB</i>&nbsp;&larr;	N5-glutamine methyltransferase	N5&#8209;glutamine methyltransferase	ECB_02255	snp_nonsynonymous	nonsynonymous	11330
3279	LTEE	Ara-1	50000	REL11330	A	point-mutator	SNP	2396548	2396548	2118	2396548	A&rarr;C	<font class=snp_type_synonymous>V706V</font>&nbsp;(GT<font class=mutation_in_codon>T</font>&rarr;GT<font class=mutation_in_codon>G</font>)&nbsp;	yfcTU	yfcTU	<i>yfcTU</i>&nbsp;&larr;	predicted outer membrane export usher protein	predicted outer membrane export usher protein	ECB_02262	snp_synonymous	synonymous	11330
3280	LTEE	Ara-1	50000	REL11330	A	point-mutator	SNP	2398568	2398568	98	2398568	A&rarr;C	<font class=snp_type_nonsynonymous>I33S</font>&nbsp;(A<font class=mutation_in_codon>T</font>T&rarr;A<font class=mutation_in_codon>G</font>T)&nbsp;	yfcTU	yfcTU	<i>yfcTU</i>&nbsp;&larr;	predicted outer membrane export usher protein	predicted outer membrane export usher protein	ECB_02262	snp_nonsynonymous	nonsynonymous	11330
3281	LTEE	Ara-1	50000	REL11330	A	point-mutator	SNP	2404817	2404817	intergenic (-219/-147)	2404817	A&rarr;C	intergenic&nbsp;(&#8209;219/&#8209;147)	yfcZ,fadL	yfcZ/fadL	<i>yfcZ</i>&nbsp;&larr;&nbsp;/&nbsp;&rarr;&nbsp;<i>fadL</i>	hypothetical protein/long-chain fatty acid outer membrane transporter	hypothetical protein/long&#8209;chain fatty acid outer membrane transporter	ECB_02267/ECB_02268	snp_intergenic	intergenic	11330
3282	LTEE	Ara-1	50000	REL11330	A	point-mutator	SNP	2410532	2410532	790	2410532	A&rarr;C	<font class=snp_type_nonsynonymous>N264H</font>&nbsp;(<font class=mutation_in_codon>A</font>AC&rarr;<font class=mutation_in_codon>C</font>AC)&nbsp;	yfdC	yfdC	<i>yfdC</i>&nbsp;&rarr;	predicted inner membrane protein	predicted inner membrane protein	ECB_02273	snp_nonsynonymous	nonsynonymous	11330
3283	LTEE	Ara-1	50000	REL11330	A	point-mutator	SNP	2414848	2414848	intergenic (+91/+17)	2414848	A&rarr;C	intergenic&nbsp;(+91/+17)	dsdA,emrY	dsdA/emrY	<i>dsdA</i>&nbsp;&rarr;&nbsp;/&nbsp;&larr;&nbsp;<i>emrY</i>	D-serine dehydratase/predicted multidrug efflux system	D&#8209;serine dehydratase/predicted multidrug efflux system	ECB_02276/ECB_02277	snp_intergenic	intergenic	11330
3284	LTEE	Ara-1	50000	REL11330	A	point-mutator	SNP	2415436	2415436	968	2415436	A&rarr;C	<font class=snp_type_nonsense>L323*</font>&nbsp;(T<font class=mutation_in_codon>T</font>A&rarr;T<font class=mutation_in_codon>G</font>A)&nbsp;	emrY	emrY	<i>emrY</i>&nbsp;&larr;	predicted multidrug efflux system	predicted multidrug efflux system	ECB_02277	snp_nonsense	nonsense	11330
3285	LTEE	Ara-1	50000	REL11330	A	point-mutator	SNP	2419950	2419950	1350	2419950	T&rarr;G	<font class=snp_type_nonsynonymous>D450E</font>&nbsp;(GA<font class=mutation_in_codon>T</font>&rarr;GA<font class=mutation_in_codon>G</font>)&nbsp;	evgS	evgS	<i>evgS</i>&nbsp;&rarr;	hybrid sensory histidine kinase in two-component regulatory system with EvgA	hybrid sensory histidine kinase in two&#8209;component regulatory system with EvgA	ECB_02280	snp_nonsynonymous	nonsynonymous	11330
3286	LTEE	Ara-1	50000	REL11330	A	point-mutator	SNP	2422120	2422120	3520	2422120	T&rarr;G	<font class=snp_type_nonsynonymous>L1174V</font>&nbsp;(<font class=mutation_in_codon>T</font>TG&rarr;<font class=mutation_in_codon>G</font>TG)&nbsp;	evgS	evgS	<i>evgS</i>&nbsp;&rarr;	hybrid sensory histidine kinase in two-component regulatory system with EvgA	hybrid sensory histidine kinase in two&#8209;component regulatory system with EvgA	ECB_02280	snp_nonsynonymous	nonsynonymous	11330
3287	LTEE	Ara-1	50000	REL11330	A	point-mutator	SNP	2426725	2426725	757	2426725	A&rarr;C	<font class=snp_type_nonsynonymous>W253G</font>&nbsp;(<font class=mutation_in_codon>T</font>GG&rarr;<font class=mutation_in_codon>G</font>GG)&nbsp;	yfdW	yfdW	<i>yfdW</i>&nbsp;&larr;	formyl-coenzyme A transferase	formyl&#8209;coenzyme A transferase	ECB_02284	snp_nonsynonymous	nonsynonymous	11330
3288	LTEE	Ara-1	50000	REL11330	A	point-mutator	SNP	2433065	2433065	170	2433065	T&rarr;G	<font class=snp_type_nonsynonymous>L57R</font>&nbsp;(C<font class=mutation_in_codon>T</font>G&rarr;C<font class=mutation_in_codon>G</font>G)&nbsp;	ypdA	ypdA	<i>ypdA</i>&nbsp;&rarr;	predicted sensory kinase in two-component system with YpdB	predicted sensory kinase in two&#8209;component system with YpdB	ECB_02290	snp_nonsynonymous	nonsynonymous	11330
3289	LTEE	Ara-1	50000	REL11330	A	point-mutator	SNP	2441578	2441578	542	2441578	A&rarr;C	<font class=snp_type_nonsynonymous>M181R</font>&nbsp;(A<font class=mutation_in_codon>T</font>G&rarr;A<font class=mutation_in_codon>G</font>G)&nbsp;	ypdG	ypdG	<i>ypdG</i>&nbsp;&larr;	predicted enzyme IIC component of PTS	predicted enzyme IIC component of PTS	ECB_02296	snp_nonsynonymous	nonsynonymous	11330
3290	LTEE	Ara-1	50000	REL11330	A	point-mutator	SNP	2444520	2444520	666	2444520	T&rarr;G	<font class=snp_type_nonsynonymous>D222E</font>&nbsp;(GA<font class=mutation_in_codon>T</font>&rarr;GA<font class=mutation_in_codon>G</font>)&nbsp;	yfeO	yfeO	<i>yfeO</i>&nbsp;&rarr;	hypothetical protein	hypothetical protein	ECB_02299	snp_nonsynonymous	nonsynonymous	11330
3291	LTEE	Ara-1	50000	REL11330	A	point-mutator	SNP	2446990	2446990	intergenic (-59/-277)	2446990	T&rarr;G	intergenic&nbsp;(&#8209;59/&#8209;277)	mntH,nupC	mntH/nupC	<i>mntH</i>&nbsp;&larr;&nbsp;/&nbsp;&rarr;&nbsp;<i>nupC</i>	manganese transport protein MntH/nucleoside (except guanosine) transporter	manganese transport protein MntH/nucleoside (except guanosine) transporter	ECB_02301/ECB_02302	snp_intergenic	intergenic	11330
3292	LTEE	Ara-1	50000	REL11330	A	point-mutator	MOB	2448493	2448498	intergenic (+24/+21)	2448493	IS<i>186</i>&nbsp;(+)&nbsp;+6&nbsp;bp	intergenic&nbsp;(+24/+21)	nupC,yfeA	nupC/yfeA	<i>nupC</i>&nbsp;&rarr;&nbsp;/&nbsp;&larr;&nbsp;<i>yfeA</i>	nucleoside (except guanosine) transporter/predicted diguanylate cyclase	nucleoside (except guanosine) transporter/predicted diguanylate cyclase	ECB_02302/ECB_02303	mobile_element_insertion	not_snp	11330
3293	LTEE	Ara-1	50000	REL11330	A	point-mutator	SNP	2449048	2449048	1661	2449048	T&rarr;G	<font class=snp_type_nonsynonymous>Q554P</font>&nbsp;(C<font class=mutation_in_codon>A</font>A&rarr;C<font class=mutation_in_codon>C</font>A)&nbsp;	yfeA	yfeA	<i>yfeA</i>&nbsp;&larr;	predicted diguanylate cyclase	predicted diguanylate cyclase	ECB_02303	snp_nonsynonymous	nonsynonymous	11330
3294	LTEE	Ara-1	50000	REL11330	A	point-mutator	SNP	2449052	2449052	1657	2449052	A&rarr;C	<font class=snp_type_nonsynonymous>L553V</font>&nbsp;(<font class=mutation_in_codon>T</font>TG&rarr;<font class=mutation_in_codon>G</font>TG)&nbsp;	yfeA	yfeA	<i>yfeA</i>&nbsp;&larr;	predicted diguanylate cyclase	predicted diguanylate cyclase	ECB_02303	snp_nonsynonymous	nonsynonymous	11330
3295	LTEE	Ara-1	50000	REL11330	A	point-mutator	SNP	2450699	2450699	10	2450699	C&rarr;A	<font class=snp_type_nonsense>E4*</font>&nbsp;(<font class=mutation_in_codon>G</font>AG&rarr;<font class=mutation_in_codon>T</font>AG)&nbsp;	yfeA	yfeA	<i>yfeA</i>&nbsp;&larr;	predicted diguanylate cyclase	predicted diguanylate cyclase	ECB_02303	snp_nonsense	nonsense	11330
3296	LTEE	Ara-1	50000	REL11330	A	point-mutator	SNP	2458829	2458829	74	2458829	A&rarr;C	<font class=snp_type_nonsynonymous>M25R</font>&nbsp;(A<font class=mutation_in_codon>T</font>G&rarr;A<font class=mutation_in_codon>G</font>G)&nbsp;	ligA	ligA	<i>ligA</i>&nbsp;&larr;	NAD-dependent DNA ligase LigA	NAD&#8209;dependent DNA ligase LigA	ECB_02311	snp_nonsynonymous	nonsynonymous	11330
3297	LTEE	Ara-1	50000	REL11330	A	point-mutator	SNP	2465005	2465005	446	2465005	A&rarr;C	<font class=snp_type_nonsynonymous>E149A</font>&nbsp;(G<font class=mutation_in_codon>A</font>A&rarr;G<font class=mutation_in_codon>C</font>A)&nbsp;	crr	crr	<i>crr</i>&nbsp;&rarr;	glucose-specific PTS system enzyme IIA component	glucose&#8209;specific PTS system enzyme IIA component	ECB_02317	snp_nonsynonymous	nonsynonymous	11330
3298	LTEE	Ara-1	50000	REL11330	A	point-mutator	SNP	2466526	2466526	52	2466526	A&rarr;C	<font class=snp_type_nonsynonymous>I18L</font>&nbsp;(<font class=mutation_in_codon>A</font>TA&rarr;<font class=mutation_in_codon>C</font>TA)&nbsp;	yfeS	yfeS	<i>yfeS</i>&nbsp;&rarr;	hypothetical protein	hypothetical protein	ECB_02320	snp_nonsynonymous	nonsynonymous	11330
3299	LTEE	Ara-1	50000	REL11330	A	point-mutator	SNP	2474580	2474580	66	2474580	A&rarr;C	<font class=snp_type_synonymous>S22S</font>&nbsp;(TC<font class=mutation_in_codon>A</font>&rarr;TC<font class=mutation_in_codon>C</font>)&nbsp;	yfeU	yfeU	<i>yfeU</i>&nbsp;&rarr;	N-acetylmuramic acid-6-phosphate etherase	N&#8209;acetylmuramic acid&#8209;6&#8209;phosphate etherase	ECB_02328	snp_synonymous	synonymous	11330
3300	LTEE	Ara-1	50000	REL11330	A	point-mutator	SNP	2475087	2475087	573	2475087	T&rarr;G	<font class=snp_type_synonymous>G191G</font>&nbsp;(GG<font class=mutation_in_codon>T</font>&rarr;GG<font class=mutation_in_codon>G</font>)&nbsp;	yfeU	yfeU	<i>yfeU</i>&nbsp;&rarr;	N-acetylmuramic acid-6-phosphate etherase	N&#8209;acetylmuramic acid&#8209;6&#8209;phosphate etherase	ECB_02328	snp_synonymous	synonymous	11330
3301	LTEE	Ara-1	50000	REL11330	A	point-mutator	SNP	2479320	2479320	338	2479320	A&rarr;C	<font class=snp_type_nonsynonymous>M113R</font>&nbsp;(A<font class=mutation_in_codon>T</font>G&rarr;A<font class=mutation_in_codon>G</font>G)&nbsp;	ypeA	ypeA	<i>ypeA</i>&nbsp;&larr;	putative acetyltransferase	putative acetyltransferase	ECB_02334	snp_nonsynonymous	nonsynonymous	11330
3302	LTEE	Ara-1	50000	REL11330	A	point-mutator	SNP	2480606	2480606	736	2480606	A&rarr;C	<font class=snp_type_nonsynonymous>I246L</font>&nbsp;(<font class=mutation_in_codon>A</font>TC&rarr;<font class=mutation_in_codon>C</font>TC)&nbsp;	amiA	amiA	<i>amiA</i>&nbsp;&rarr;	N-acetylmuramoyl-l-alanine amidase I	N&#8209;acetylmuramoyl&#8209;l&#8209;alanine amidase I	ECB_02335	snp_nonsynonymous	nonsynonymous	11330
3303	LTEE	Ara-1	50000	REL11330	A	point-mutator	SNP	2482625	2482625	77	2482625	T&rarr;G	<font class=snp_type_nonsynonymous>K26T</font>&nbsp;(A<font class=mutation_in_codon>A</font>G&rarr;A<font class=mutation_in_codon>C</font>G)&nbsp;	yfeG	yfeG	<i>yfeG</i>&nbsp;&larr;	predicted DNA-binding transcriptional regulator	predicted DNA&#8209;binding transcriptional regulator	ECB_02337	snp_nonsynonymous	nonsynonymous	11330
3304	LTEE	Ara-1	50000	REL11330	A	point-mutator	SNP	2483050	2483050	198	2483050	A&rarr;C	<font class=snp_type_synonymous>R66R</font>&nbsp;(CG<font class=mutation_in_codon>T</font>&rarr;CG<font class=mutation_in_codon>G</font>)&nbsp;	yffI	yffI	<i>yffI</i>&nbsp;&larr;	predicted carboxysome structural protein with predicted role in ethanolamine utilization	predicted carboxysome structural protein with predicted role in ethanolamine utilization	ECB_02338	snp_synonymous	synonymous	11330
3305	LTEE	Ara-1	50000	REL11330	A	point-mutator	SNP	2492626	2492626	254	2492626	A&rarr;C	<font class=snp_type_nonsynonymous>V85G</font>&nbsp;(G<font class=mutation_in_codon>T</font>G&rarr;G<font class=mutation_in_codon>G</font>G)&nbsp;	cchB	cchB	<i>cchB</i>&nbsp;&larr;	predicted carboxysome structural protein, ethanolamine utilization protein	predicted carboxysome structural protein, ethanolamine utilization protein	ECB_02347	snp_nonsynonymous	nonsynonymous	11330
3306	LTEE	Ara-1	50000	REL11330	A	point-mutator	SNP	2492678	2492678	202	2492678	T&rarr;G	<font class=snp_type_nonsynonymous>K68Q</font>&nbsp;(<font class=mutation_in_codon>A</font>AA&rarr;<font class=mutation_in_codon>C</font>AA)&nbsp;	cchB	cchB	<i>cchB</i>&nbsp;&larr;	predicted carboxysome structural protein, ethanolamine utilization protein	predicted carboxysome structural protein, ethanolamine utilization protein	ECB_02347	snp_nonsynonymous	nonsynonymous	11330
3307	LTEE	Ara-1	50000	REL11330	A	point-mutator	SNP	2494611	2494611	523	2494611	A&rarr;C	<font class=snp_type_nonsynonymous>S175A</font>&nbsp;(<font class=mutation_in_codon>T</font>CT&rarr;<font class=mutation_in_codon>G</font>CT)&nbsp;	eutT	eutT	<i>eutT</i>&nbsp;&larr;	predicted cobalamin adenosyltransferase in ethanolamine utilization	predicted cobalamin adenosyltransferase in ethanolamine utilization	ECB_02350	snp_nonsynonymous	nonsynonymous	11330
3308	LTEE	Ara-1	50000	REL11330	A	point-mutator	SNP	2499945	2499945	452	2499945	A&rarr;C	<font class=snp_type_nonsynonymous>N151T</font>&nbsp;(A<font class=mutation_in_codon>A</font>C&rarr;A<font class=mutation_in_codon>C</font>C)&nbsp;	talA	talA	<i>talA</i>&nbsp;&rarr;	transaldolase A	transaldolase A	ECB_02355	snp_nonsynonymous	nonsynonymous	11330
3309	LTEE	Ara-1	50000	REL11330	A	point-mutator	SNP	2500146	2500146	653	2500146	A&rarr;C	<font class=snp_type_nonsynonymous>E218A</font>&nbsp;(G<font class=mutation_in_codon>A</font>A&rarr;G<font class=mutation_in_codon>C</font>A)&nbsp;	talA	talA	<i>talA</i>&nbsp;&rarr;	transaldolase A	transaldolase A	ECB_02355	snp_nonsynonymous	nonsynonymous	11330
3310	LTEE	Ara-1	50000	REL11330	A	point-mutator	SNP	2506175	2506175	179	2506175	T&rarr;G	<font class=snp_type_nonsynonymous>E60A</font>&nbsp;(G<font class=mutation_in_codon>A</font>A&rarr;G<font class=mutation_in_codon>C</font>A)&nbsp;	aegA	aegA	<i>aegA</i>&nbsp;&larr;	fused predicted oxidoreductase: FeS binding subunit/NAD/FAD-binding subunit	fused predicted oxidoreductase: FeS binding subunit/NAD/FAD&#8209;binding subunit	ECB_02359	snp_nonsynonymous	nonsynonymous	11330
3311	LTEE	Ara-1	50000	REL11330	A	point-mutator	SNP	2508339	2508339	intergenic (+80/-84)	2508339	T&rarr;G	intergenic&nbsp;(+80/&#8209;84)	narQ,acrD	narQ/acrD	<i>narQ</i>&nbsp;&rarr;&nbsp;/&nbsp;&rarr;&nbsp;<i>acrD</i>	sensory histidine kinase in two-component regulatory system with NarP (NarL)/aminoglycoside/multidrug efflux system	sensory histidine kinase in two&#8209;component regulatory system with NarP (NarL)/aminoglycoside/multidrug efflux system	ECB_02360/ECB_02361	snp_intergenic	intergenic	11330
3312	LTEE	Ara-1	50000	REL11330	A	point-mutator	SNP	2510826	2510826	2404	2510826	T&rarr;G	<font class=snp_type_nonsynonymous>F802V</font>&nbsp;(<font class=mutation_in_codon>T</font>TC&rarr;<font class=mutation_in_codon>G</font>TC)&nbsp;	acrD	acrD	<i>acrD</i>&nbsp;&rarr;	aminoglycoside/multidrug efflux system	aminoglycoside/multidrug efflux system	ECB_02361	snp_nonsynonymous	nonsynonymous	11330
3313	LTEE	Ara-1	50000	REL11330	A	point-mutator	SNP	2511731	2511731	intergenic (+195/-344)	2511731	A&rarr;C	intergenic&nbsp;(+195/&#8209;344)	acrD,yffB	acrD/yffB	<i>acrD</i>&nbsp;&rarr;&nbsp;/&nbsp;&rarr;&nbsp;<i>yffB</i>	aminoglycoside/multidrug efflux system/hypothetical protein	aminoglycoside/multidrug efflux system/hypothetical protein	ECB_02361/ECB_02362	snp_intergenic	intergenic	11330
3314	LTEE	Ara-1	50000	REL11330	A	point-mutator	SNP	2520902	2520902	169	2520902	T&rarr;G	<font class=snp_type_nonsynonymous>S57A</font>&nbsp;(<font class=mutation_in_codon>T</font>CA&rarr;<font class=mutation_in_codon>G</font>CA)&nbsp;	gcvR	gcvR	<i>gcvR</i>&nbsp;&rarr;	DNA-binding transcriptional repressor, regulatory protein accessory to GcvA	DNA&#8209;binding transcriptional repressor, regulatory protein accessory to GcvA	ECB_02371	snp_nonsynonymous	nonsynonymous	11330
3315	LTEE	Ara-1	50000	REL11330	A	point-mutator	SNP	2527624	2527624	537	2527624	A&rarr;C	<font class=snp_type_synonymous>I179I</font>&nbsp;(AT<font class=mutation_in_codon>A</font>&rarr;AT<font class=mutation_in_codon>C</font>)&nbsp;	hyfE	hyfE	<i>hyfE</i>&nbsp;&rarr;	hydrogenase 4, membrane subunit	hydrogenase 4, membrane subunit	ECB_02377	snp_synonymous	synonymous	11330
3316	LTEE	Ara-1	50000	REL11330	A	point-mutator	SNP	2540745	2540745	236	2540745	A&rarr;C	<font class=snp_type_nonsynonymous>V79G</font>&nbsp;(G<font class=mutation_in_codon>T</font>A&rarr;G<font class=mutation_in_codon>G</font>A)&nbsp;	uraA	uraA	<i>uraA</i>&nbsp;&larr;	uracil transporter	uracil transporter	ECB_02389	snp_nonsynonymous	nonsynonymous	11330
3317	LTEE	Ara-1	50000	REL11330	A	point-mutator	SNP	2541919	2541919	intergenic (-227/-98)	2541919	A&rarr;C	intergenic&nbsp;(&#8209;227/&#8209;98)	upp,purM	upp/purM	<i>upp</i>&nbsp;&larr;&nbsp;/&nbsp;&rarr;&nbsp;<i>purM</i>	uracil phosphoribosyltransferase/phosphoribosylaminoimidazole synthetase	uracil phosphoribosyltransferase/phosphoribosylaminoimidazole synthetase	ECB_02390/ECB_02391	snp_intergenic	intergenic	11330
3318	LTEE	Ara-1	50000	REL11330	A	point-mutator	SNP	2547024	2547024	1091	2547024	G&rarr;T	<font class=snp_type_nonsynonymous>R364L</font>&nbsp;(C<font class=mutation_in_codon>G</font>A&rarr;C<font class=mutation_in_codon>T</font>A)&nbsp;	ppx	ppx	<i>ppx</i>&nbsp;&rarr;	exopolyphosphatase	exopolyphosphatase	ECB_02394	snp_nonsynonymous	nonsynonymous	11330
3319	LTEE	Ara-1	50000	REL11330	A	point-mutator	SNP	2547935	2547935	1823	2547935	A&rarr;C	<font class=snp_type_nonsynonymous>I608S</font>&nbsp;(A<font class=mutation_in_codon>T</font>T&rarr;A<font class=mutation_in_codon>G</font>T)&nbsp;	yfgF	yfgF	<i>yfgF</i>&nbsp;&larr;	predicted inner membrane protein	predicted inner membrane protein	ECB_02395	snp_nonsynonymous	nonsynonymous	11330
3320	LTEE	Ara-1	50000	REL11330	A	point-mutator	SNP	2553535	2553535	1355	2553535	T&rarr;G	<font class=snp_type_nonsynonymous>E452A</font>&nbsp;(G<font class=mutation_in_codon>A</font>A&rarr;G<font class=mutation_in_codon>C</font>A)&nbsp;	guaB	guaB	<i>guaB</i>&nbsp;&larr;	inositol-5-monophosphate dehydrogenase	inositol&#8209;5&#8209;monophosphate dehydrogenase	ECB_02400	snp_nonsynonymous	nonsynonymous	11330
3321	LTEE	Ara-1	50000	REL11330	A	point-mutator	SNP	2558035	2558035	141	2558035	A&rarr;C	<font class=snp_type_nonsynonymous>I47M</font>&nbsp;(AT<font class=mutation_in_codon>T</font>&rarr;AT<font class=mutation_in_codon>G</font>)&nbsp;	yfgK	yfgK	<i>yfgK</i>&nbsp;&larr;	GTP-binding protein EngA	GTP&#8209;binding protein EngA	ECB_02403	snp_nonsynonymous	nonsynonymous	11330
3322	LTEE	Ara-1	50000	REL11330	A	point-mutator	SNP	2560912	2560912	483	2560912	T&rarr;G	<font class=snp_type_synonymous>V161V</font>&nbsp;(GT<font class=mutation_in_codon>A</font>&rarr;GT<font class=mutation_in_codon>C</font>)&nbsp;	hisS	hisS	<i>hisS</i>&nbsp;&larr;	histidyl-tRNA synthetase	histidyl&#8209;tRNA synthetase	ECB_02406	snp_synonymous	synonymous	11330
3323	LTEE	Ara-1	50000	REL11330	A	point-mutator	SNP	2575904	2575904	1274	2575904	A&rarr;C	<font class=snp_type_nonsense>L425*</font>&nbsp;(T<font class=mutation_in_codon>T</font>A&rarr;T<font class=mutation_in_codon>G</font>A)&nbsp;	pepB	pepB	<i>pepB</i>&nbsp;&larr;	aminopeptidase B	aminopeptidase B	ECB_02415	snp_nonsense	nonsense	11330
3324	LTEE	Ara-1	50000	REL11330	A	point-mutator	SNP	2577786	2577786	1849	2577786	A&rarr;C	<font class=snp_type_nonsynonymous>*617E</font>&nbsp;(<font class=mutation_in_codon>T</font>AA&rarr;<font class=mutation_in_codon>G</font>AA)&nbsp;	hscA	hscA	<i>hscA</i>&nbsp;&larr;	chaperone protein HscA	chaperone protein HscA	ECB_02418	snp_nonsynonymous	nonsynonymous	11330
3325	LTEE	Ara-1	50000	REL11330	A	point-mutator	SNP	2577869	2577869	1766	2577869	T&rarr;G	<font class=snp_type_nonsynonymous>D589A</font>&nbsp;(G<font class=mutation_in_codon>A</font>C&rarr;G<font class=mutation_in_codon>C</font>C)&nbsp;	hscA	hscA	<i>hscA</i>&nbsp;&larr;	chaperone protein HscA	chaperone protein HscA	ECB_02418	snp_nonsynonymous	nonsynonymous	11330
3326	LTEE	Ara-1	50000	REL11330	A	point-mutator	SNP	2581846	2581846	385	2581846	T&rarr;G	<font class=snp_type_nonsynonymous>N129H</font>&nbsp;(<font class=mutation_in_codon>A</font>AC&rarr;<font class=mutation_in_codon>C</font>AC)&nbsp;	iscS	iscS	<i>iscS</i>&nbsp;&larr;	cysteine desulfurase	cysteine desulfurase	ECB_02422	snp_nonsynonymous	nonsynonymous	11330
3327	LTEE	Ara-1	50000	REL11330	A	point-mutator	SNP	2582325	2582325	intergenic (-95/+17)	2582325	A&rarr;C	intergenic&nbsp;(&#8209;95/+17)	iscS,iscR	iscS/iscR	<i>iscS</i>&nbsp;&larr;&nbsp;/&nbsp;&larr;&nbsp;<i>iscR</i>	cysteine desulfurase/DNA-binding transcriptional repressor	cysteine desulfurase/DNA&#8209;binding transcriptional repressor	ECB_02422/ECB_02423	snp_intergenic	intergenic	11330
3328	LTEE	Ara-1	50000	REL11330	A	point-mutator	SNP	2594015	2594015	43	2594015	A&rarr;C	<font class=snp_type_nonsynonymous>K15Q</font>&nbsp;(<font class=mutation_in_codon>A</font>AA&rarr;<font class=mutation_in_codon>C</font>AA)&nbsp;	yphA	yphA	<i>yphA</i>&nbsp;&rarr;	predicted inner membrane protein	predicted inner membrane protein	ECB_02435	snp_nonsynonymous	nonsynonymous	11330
3329	LTEE	Ara-1	50000	REL11330	A	point-mutator	SNP	2599497	2599497	570	2599497	A&rarr;C	<font class=snp_type_synonymous>V190V</font>&nbsp;(GT<font class=mutation_in_codon>T</font>&rarr;GT<font class=mutation_in_codon>G</font>)&nbsp;	yphF	yphF	<i>yphF</i>&nbsp;&larr;	predicted sugar transporter subunit: periplasmic-binding component of ABC superfamily	predicted sugar transporter subunit: periplasmic&#8209;binding component of ABC superfamily	ECB_02440	snp_synonymous	synonymous	11330
3330	LTEE	Ara-1	50000	REL11330	A	point-mutator	SNP	2602523	2602523	922	2602523	T&rarr;G	<font class=snp_type_nonsynonymous>N308H</font>&nbsp;(<font class=mutation_in_codon>A</font>AC&rarr;<font class=mutation_in_codon>C</font>AC)&nbsp;	yphG	yphG	<i>yphG</i>&nbsp;&larr;	hypothetical protein	hypothetical protein	ECB_02441	snp_nonsynonymous	nonsynonymous	11330
3331	LTEE	Ara-1	50000	REL11330	A	point-mutator	SNP	2619549	2619549	431	2619549	A&rarr;C	<font class=snp_type_nonsynonymous>V144G</font>&nbsp;(G<font class=mutation_in_codon>T</font>C&rarr;G<font class=mutation_in_codon>G</font>C)&nbsp;	yfhB	yfhB	<i>yfhB</i>&nbsp;&larr;	hypothetical protein	hypothetical protein	ECB_02454	snp_nonsynonymous	nonsynonymous	11330
3332	LTEE	Ara-1	50000	REL11330	A	point-mutator	SNP	2637610	2637610	333	2637610	A&rarr;C	<font class=snp_type_synonymous>T111T</font>&nbsp;(AC<font class=mutation_in_codon>T</font>&rarr;AC<font class=mutation_in_codon>G</font>)&nbsp;	yfiD	yfiD	<i>yfiD</i>&nbsp;&larr;	pyruvate formate lyase subunit	pyruvate formate lyase subunit	ECB_02473	snp_synonymous	synonymous	11330
3333	LTEE	Ara-1	50000	REL11330	A	point-mutator	SNP	2637769	2637769	174	2637769	T&rarr;G	<font class=snp_type_synonymous>P58P</font>&nbsp;(CC<font class=mutation_in_codon>A</font>&rarr;CC<font class=mutation_in_codon>C</font>)&nbsp;	yfiD	yfiD	<i>yfiD</i>&nbsp;&larr;	pyruvate formate lyase subunit	pyruvate formate lyase subunit	ECB_02473	snp_synonymous	synonymous	11330
3334	LTEE	Ara-1	50000	REL11330	A	point-mutator	SNP	2639091	2639091	931	2639091	T&rarr;G	<font class=snp_type_nonsynonymous>N311H</font>&nbsp;(<font class=mutation_in_codon>A</font>AC&rarr;<font class=mutation_in_codon>C</font>AC)&nbsp;	yfiF	yfiF	<i>yfiF</i>&nbsp;&larr;	predicted methyltransferase	predicted methyltransferase	ECB_02475	snp_nonsynonymous	nonsynonymous	11330
3335	LTEE	Ara-1	50000	REL11330	A	point-mutator	SNP	2641700	2641700	255	2641700	T&rarr;G	<font class=snp_type_synonymous>L85L</font>&nbsp;(CT<font class=mutation_in_codon>T</font>&rarr;CT<font class=mutation_in_codon>G</font>)&nbsp;	yfiQ	yfiQ	<i>yfiQ</i>&nbsp;&rarr;	fused predicted acyl-CoA synthetase: NAD(P)-binding subunit/ATP-binding subunit	fused predicted acyl&#8209;CoA synthetase: NAD(P)&#8209;binding subunit/ATP&#8209;binding subunit	ECB_02478	snp_synonymous	synonymous	11330
3336	LTEE	Ara-1	50000	REL11330	A	point-mutator	SNP	2644861	2644861	642	2644861	T&rarr;G	<font class=snp_type_nonsynonymous>D214E</font>&nbsp;(GA<font class=mutation_in_codon>T</font>&rarr;GA<font class=mutation_in_codon>G</font>)&nbsp;	pssA	pssA	<i>pssA</i>&nbsp;&rarr;	phosphatidylserine synthase	phosphatidylserine synthase	ECB_02479	snp_nonsynonymous	nonsynonymous	11330
3337	LTEE	Ara-1	50000	REL11330	A	point-mutator	SNP	2646159	2646159	1081	2646159	T&rarr;G	<font class=snp_type_nonsynonymous>K361Q</font>&nbsp;(<font class=mutation_in_codon>A</font>AG&rarr;<font class=mutation_in_codon>C</font>AG)&nbsp;	kgtP	kgtP	<i>kgtP</i>&nbsp;&larr;	alpha-ketoglutarate transporter	alpha&#8209;ketoglutarate transporter	ECB_02481	snp_nonsynonymous	nonsynonymous	11330
3338	LTEE	Ara-1	50000	REL11330	A	point-mutator	SNP	2658405	2658405	intergenic (+114/-157)	2658405	A&rarr;C	intergenic&nbsp;(+114/&#8209;157)	yfiO,yfiA	yfiO/yfiA	<i>yfiO</i>&nbsp;&rarr;&nbsp;/&nbsp;&rarr;&nbsp;<i>yfiA</i>	predicted lipoprotein/cold shock protein associated with 30S ribosomal subunit	predicted lipoprotein/cold shock protein associated with 30S ribosomal subunit	ECB_02485/ECB_02486	snp_intergenic	intergenic	11330
3339	LTEE	Ara-1	50000	REL11330	A	point-mutator	SNP	2659676	2659676	525	2659676	T&rarr;G	<font class=snp_type_nonsynonymous>H175Q</font>&nbsp;(CA<font class=mutation_in_codon>T</font>&rarr;CA<font class=mutation_in_codon>G</font>)&nbsp;	pheA	pheA	<i>pheA</i>&nbsp;&rarr;	fused chorismate mutase P/prephenate dehydratase	fused chorismate mutase P/prephenate dehydratase	ECB_02488	snp_nonsynonymous	nonsynonymous	11330
3340	LTEE	Ara-1	50000	REL11330	A	point-mutator	SNP	2663688	2663688	407	2663688	T&rarr;G	<font class=snp_type_nonsynonymous>I136S</font>&nbsp;(A<font class=mutation_in_codon>T</font>C&rarr;A<font class=mutation_in_codon>G</font>C)&nbsp;	yfiR	yfiR	<i>yfiR</i>&nbsp;&rarr;	hypothetical protein	hypothetical protein	ECB_02492	snp_nonsynonymous	nonsynonymous	11330
3341	LTEE	Ara-1	50000	REL11330	A	point-mutator	SNP	2667587	2667587	6	2667587	T&rarr;G	<font class=snp_type_synonymous>V2V</font>&nbsp;(GT<font class=mutation_in_codon>A</font>&rarr;GT<font class=mutation_in_codon>C</font>)&nbsp;	rpsP	rpsP	<i>rpsP</i>&nbsp;&larr;	30S ribosomal protein S16	30S ribosomal protein S16	ECB_02498	snp_synonymous	synonymous	11330
3342	LTEE	Ara-1	50000	REL11330	A	point-mutator	SNP	2671458	2671458	546	2671458	A&rarr;C	<font class=snp_type_synonymous>G182G</font>&nbsp;(GG<font class=mutation_in_codon>T</font>&rarr;GG<font class=mutation_in_codon>G</font>)&nbsp;	grpE	grpE	<i>grpE</i>&nbsp;&larr;	heat shock protein	heat shock protein	ECB_02502	snp_synonymous	synonymous	11330
3343	LTEE	Ara-1	50000	REL11330	A	point-mutator	SNP	2677546	2677546	130	2677546	A&rarr;C	<font class=snp_type_nonsynonymous>K44Q</font>&nbsp;(<font class=mutation_in_codon>A</font>AA&rarr;<font class=mutation_in_codon>C</font>AA)&nbsp;	ECB_02509	ECB_02509	<i>ECB_02509</i>&nbsp;&rarr;	Fels-2 prophage protein	Fels&#8209;2 prophage protein	ECB_02509	snp_nonsynonymous	nonsynonymous	11330
3344	LTEE	Ara-1	50000	REL11330	A	point-mutator	SNP	2678812	2678812	intergenic (+166/-117)	2678812	A&rarr;C	intergenic&nbsp;(+166/&#8209;117)	ECB_02509,ECB_02510	ECB_02509/ECB_02510	<i>ECB_02509</i>&nbsp;&rarr;&nbsp;/&nbsp;&rarr;&nbsp;<i>ECB_02510</i>	Fels-2 prophage protein/Recombinase	Fels&#8209;2 prophage protein/Recombinase	ECB_02509/ECB_02510	snp_intergenic	intergenic	11330
3345	LTEE	Ara-1	50000	REL11330	A	point-mutator	SNP	2682232	2682232	865	2682232	G&rarr;T	<font class=snp_type_nonsynonymous>D289Y</font>&nbsp;(<font class=mutation_in_codon>G</font>AT&rarr;<font class=mutation_in_codon>T</font>AT)&nbsp;	ECB_02512	ECB_02512	<i>ECB_02512</i>&nbsp;&rarr;	conserved hypothetical protein	conserved hypothetical protein	ECB_02512	snp_nonsynonymous	nonsynonymous	11330
3346	LTEE	Ara-1	50000	REL11330	A	point-mutator	SNP	2686836	2686836	884	2686836	T&rarr;G	<font class=snp_type_nonsense>L295*</font>&nbsp;(T<font class=mutation_in_codon>T</font>A&rarr;T<font class=mutation_in_codon>G</font>A)&nbsp;	gabD	gabD	<i>gabD</i>&nbsp;&rarr;	succinate-semialdehyde dehydrogenase I, NADP-dependent	succinate&#8209;semialdehyde dehydrogenase I, NADP&#8209;dependent	ECB_02517	snp_nonsense	nonsense	11330
3347	LTEE	Ara-1	50000	REL11330	A	point-mutator	SNP	2699368	2699368	intergenic (+155/-199)	2699368	T&rarr;G	intergenic&nbsp;(+155/&#8209;199)	nrdF,proV	nrdF/proV	<i>nrdF</i>&nbsp;&rarr;&nbsp;/&nbsp;&rarr;&nbsp;<i>proV</i>	ribonucleotide-diphosphate reductase beta subunit/glycine betaine transporter subunit	ribonucleotide&#8209;diphosphate reductase beta subunit/glycine betaine transporter subunit	ECB_02532/ECB_02533	snp_intergenic	intergenic	11330
3348	LTEE	Ara-1	50000	REL11330	A	point-mutator	SNP	2699874	2699874	308	2699874	T&rarr;G	<font class=snp_type_nonsynonymous>V103G</font>&nbsp;(G<font class=mutation_in_codon>T</font>G&rarr;G<font class=mutation_in_codon>G</font>G)&nbsp;	proV	proV	<i>proV</i>&nbsp;&rarr;	glycine betaine transporter subunit	glycine betaine transporter subunit	ECB_02533	snp_nonsynonymous	nonsynonymous	11330
3349	LTEE	Ara-1	50000	REL11330	A	point-mutator	SNP	2704327	2704327	1160	2704327	T&rarr;G	<font class=snp_type_nonsynonymous>F387C</font>&nbsp;(T<font class=mutation_in_codon>T</font>T&rarr;T<font class=mutation_in_codon>G</font>T)&nbsp;	ygaX	ygaX	<i>ygaX</i>&nbsp;&rarr;	predicted transporter	predicted transporter	ECB_02536	snp_nonsynonymous	nonsynonymous	11330
3350	LTEE	Ara-1	50000	REL11330	A	point-mutator	SNP	2716891	2716891	intergenic (-21/+107)	2716891	A&rarr;C	intergenic&nbsp;(&#8209;21/+107)	alaS,recX	alaS/recX	<i>alaS</i>&nbsp;&larr;&nbsp;/&nbsp;&larr;&nbsp;<i>recX</i>	alanyl-tRNA synthetase/RecA regulator RecX	alanyl&#8209;tRNA synthetase/RecA regulator RecX	ECB_02547/ECB_02548	snp_intergenic	intergenic	11330
3351	LTEE	Ara-1	50000	REL11330	A	point-mutator	SNP	2717011	2717011	488	2717011	T&rarr;G	<font class=snp_type_nonsynonymous>N163T</font>&nbsp;(A<font class=mutation_in_codon>A</font>T&rarr;A<font class=mutation_in_codon>C</font>T)&nbsp;	recX	recX	<i>recX</i>&nbsp;&larr;	RecA regulator RecX	RecA regulator RecX	ECB_02548	snp_nonsynonymous	nonsynonymous	11330
3352	LTEE	Ara-1	50000	REL11330	A	point-mutator	SNP	2717333	2717333	166	2717333	A&rarr;C	<font class=snp_type_nonsynonymous>Y56D</font>&nbsp;(<font class=mutation_in_codon>T</font>AC&rarr;<font class=mutation_in_codon>G</font>AC)&nbsp;	recX	recX	<i>recX</i>&nbsp;&larr;	RecA regulator RecX	RecA regulator RecX	ECB_02548	snp_nonsynonymous	nonsynonymous	11330
3353	LTEE	Ara-1	50000	REL11330	A	point-mutator	SNP	2730429	2730429	1857	2730429	A&rarr;C	<font class=snp_type_synonymous>A619A</font>&nbsp;(GC<font class=mutation_in_codon>T</font>&rarr;GC<font class=mutation_in_codon>G</font>)&nbsp;	hypF	hypF	<i>hypF</i>&nbsp;&larr;	carbamoyl phosphate phosphatase and maturation protein for [NiFe] hydrogenases	carbamoyl phosphate phosphatase and maturation protein for [NiFe] hydrogenases	ECB_02562	snp_synonymous	synonymous	11330
3354	LTEE	Ara-1	50000	REL11330	A	point-mutator	SNP	2733684	2733684	444	2733684	A&rarr;C	<font class=snp_type_synonymous>L148L</font>&nbsp;(CT<font class=mutation_in_codon>T</font>&rarr;CT<font class=mutation_in_codon>G</font>)&nbsp;	ascG	ascG	<i>ascG</i>&nbsp;&larr;	DNA-binding transcriptional repressor	DNA&#8209;binding transcriptional repressor	ECB_02564	snp_synonymous	synonymous	11330
3355	LTEE	Ara-1	50000	REL11330	A	point-mutator	SNP	2739365	2739365	248	2739365	T&rarr;G	<font class=snp_type_nonsynonymous>E83A</font>&nbsp;(G<font class=mutation_in_codon>A</font>A&rarr;G<font class=mutation_in_codon>C</font>A)&nbsp;	hycF	hycF	<i>hycF</i>&nbsp;&larr;	formate hydrogenlyase complex iron-sulfur protein	formate hydrogenlyase complex iron&#8209;sulfur protein	ECB_02570	snp_nonsynonymous	nonsynonymous	11330
3356	LTEE	Ara-1	50000	REL11330	A	point-mutator	SNP	2739590	2739590	23	2739590	A&rarr;C	<font class=snp_type_nonsynonymous>V8G</font>&nbsp;(G<font class=mutation_in_codon>T</font>C&rarr;G<font class=mutation_in_codon>G</font>C)&nbsp;	hycF	hycF	<i>hycF</i>&nbsp;&larr;	formate hydrogenlyase complex iron-sulfur protein	formate hydrogenlyase complex iron&#8209;sulfur protein	ECB_02570	snp_nonsynonymous	nonsynonymous	11330
3357	LTEE	Ara-1	50000	REL11330	A	point-mutator	SNP	2744019	2744019	83	2744019	T&rarr;G	<font class=snp_type_nonsynonymous>K28T</font>&nbsp;(A<font class=mutation_in_codon>A</font>A&rarr;A<font class=mutation_in_codon>C</font>A)&nbsp;	hycC	hycC	<i>hycC</i>&nbsp;&larr;	NADH dehydrogenase subunit N	NADH dehydrogenase subunit N	ECB_02573	snp_nonsynonymous	nonsynonymous	11330
3358	LTEE	Ara-1	50000	REL11330	A	point-mutator	SNP	2746432	2746432	572	2746432	A&rarr;C	<font class=snp_type_nonsynonymous>E191A</font>&nbsp;(G<font class=mutation_in_codon>A</font>A&rarr;G<font class=mutation_in_codon>C</font>A)&nbsp;	hypB	hypB	<i>hypB</i>&nbsp;&rarr;	GTP hydrolase involved in nickel liganding into hydrogenases	GTP hydrolase involved in nickel liganding into hydrogenases	ECB_02577	snp_nonsynonymous	nonsynonymous	11330
3359	LTEE	Ara-1	50000	REL11330	A	point-mutator	SNP	2761930	2761930	483	2761930	T&rarr;G	<font class=snp_type_nonsynonymous>Q161H</font>&nbsp;(CA<font class=mutation_in_codon>A</font>&rarr;CA<font class=mutation_in_codon>C</font>)&nbsp;	rpoS	rpoS	<i>rpoS</i>&nbsp;&larr;	RNA polymerase sigma factor	RNA polymerase sigma factor	ECB_02591	snp_nonsynonymous	nonsynonymous	11330
3360	LTEE	Ara-1	50000	REL11330	A	point-mutator	SNP	2762605	2762605	1010	2762605	T&rarr;G	<font class=snp_type_nonsynonymous>Q337P</font>&nbsp;(C<font class=mutation_in_codon>A</font>A&rarr;C<font class=mutation_in_codon>C</font>A)&nbsp;	nlpD	nlpD	<i>nlpD</i>&nbsp;&larr;	predicted outer membrane lipoprotein	predicted outer membrane lipoprotein	ECB_02592	snp_nonsynonymous	nonsynonymous	11330
3361	LTEE	Ara-1	50000	REL11330	A	point-mutator	SNP	2774258	2774258	intergenic (+235/+203)	2774258	A&rarr;C	intergenic&nbsp;(+235/+203)	insL-5,insK-3	insL-5/insK-3	<i>insL&#8209;5</i>&nbsp;&rarr;&nbsp;/&nbsp;&larr;&nbsp;<i>insK&#8209;3</i>	putative transposase insL for insertion sequence IS186/IS150 putative transposase	putative transposase insL for insertion sequence IS186/IS150 putative transposase	ECB_02604/ECB_02605	snp_intergenic	intergenic	11330
3362	LTEE	Ara-1	50000	REL11330	A	point-mutator	SNP	2784149	2784149	131	2784149	A&rarr;C	<font class=snp_type_nonsynonymous>V44G</font>&nbsp;(G<font class=mutation_in_codon>T</font>G&rarr;G<font class=mutation_in_codon>G</font>G)&nbsp;	ygcQ	ygcQ	<i>ygcQ</i>&nbsp;&larr;	predicted flavoprotein	predicted flavoprotein	ECB_02614	snp_nonsynonymous	nonsynonymous	11330
3363	LTEE	Ara-1	50000	REL11330	A	point-mutator	SNP	2784272	2784272	8	2784272	A&rarr;C	<font class=snp_type_nonsynonymous>I3S</font>&nbsp;(A<font class=mutation_in_codon>T</font>C&rarr;A<font class=mutation_in_codon>G</font>C)&nbsp;	ygcQ	ygcQ	<i>ygcQ</i>&nbsp;&larr;	predicted flavoprotein	predicted flavoprotein	ECB_02614	snp_nonsynonymous	nonsynonymous	11330
3364	LTEE	Ara-1	50000	REL11330	A	point-mutator	SNP	2784792	2784792	264	2784792	A&rarr;C	<font class=snp_type_synonymous>A88A</font>&nbsp;(GC<font class=mutation_in_codon>T</font>&rarr;GC<font class=mutation_in_codon>G</font>)&nbsp;	ygcR	ygcR	<i>ygcR</i>&nbsp;&larr;	predicted flavoprotein	predicted flavoprotein	ECB_02615	snp_synonymous	synonymous	11330
3365	LTEE	Ara-1	50000	REL11330	A	point-mutator	SNP	2784895	2784895	161	2784895	T&rarr;G	<font class=snp_type_nonsynonymous>Q54P</font>&nbsp;(C<font class=mutation_in_codon>A</font>G&rarr;C<font class=mutation_in_codon>C</font>G)&nbsp;	ygcR	ygcR	<i>ygcR</i>&nbsp;&larr;	predicted flavoprotein	predicted flavoprotein	ECB_02615	snp_nonsynonymous	nonsynonymous	11330
3366	LTEE	Ara-1	50000	REL11330	A	point-mutator	DEL	2792665	2792725	coding (157-217/849 nt)	2792665	&Delta;61&nbsp;bp	coding&nbsp;(157&#8209;217/849&nbsp;nt)	ECB_02621	ECB_02621	<i>ECB_02621</i>&nbsp;&rarr;	conserved hypothetical protein	conserved hypothetical protein	ECB_02621	large_deletion	not_snp	11330
3367	LTEE	Ara-1	50000	REL11330	A	point-mutator	SNP	2793464	2793464	intergenic (+107/+211)	2793464	A&rarr;C	intergenic&nbsp;(+107/+211)	ECB_02621,ygcF	ECB_02621/ygcF	<i>ECB_02621</i>&nbsp;&rarr;&nbsp;/&nbsp;&larr;&nbsp;<i>ygcF</i>	conserved hypothetical protein/hypothetical protein	conserved hypothetical protein/hypothetical protein	ECB_02621/ECB_02622	snp_intergenic	intergenic	11330
3368	LTEE	Ara-1	50000	REL11330	A	point-mutator	SNP	2794265	2794265	82	2794265	A&rarr;C	<font class=snp_type_nonsynonymous>L28V</font>&nbsp;(<font class=mutation_in_codon>T</font>TA&rarr;<font class=mutation_in_codon>G</font>TA)&nbsp;	ygcF	ygcF	<i>ygcF</i>&nbsp;&larr;	hypothetical protein	hypothetical protein	ECB_02622	snp_nonsynonymous	nonsynonymous	11330
3369	LTEE	Ara-1	50000	REL11330	A	point-mutator	SNP	2794464	2794464	intergenic (-118/-175)	2794464	A&rarr;C	intergenic&nbsp;(&#8209;118/&#8209;175)	ygcF,ygcG	ygcF/ygcG	<i>ygcF</i>&nbsp;&larr;&nbsp;/&nbsp;&rarr;&nbsp;<i>ygcG</i>	hypothetical protein/hypothetical protein	hypothetical protein/hypothetical protein	ECB_02622/ECB_02623	snp_intergenic	intergenic	11330
3370	LTEE	Ara-1	50000	REL11330	A	point-mutator	SNP	2799764	2799764	256	2799764	T&rarr;G	<font class=snp_type_synonymous>R86R</font>&nbsp;(<font class=mutation_in_codon>A</font>GA&rarr;<font class=mutation_in_codon>C</font>GA)&nbsp;	chpA	chpA	<i>chpA</i>&nbsp;&larr;	toxin of the ChpA-ChpR toxin-antitoxin system, endoribonuclease	toxin of the ChpA&#8209;ChpR toxin&#8209;antitoxin system, endoribonuclease	ECB_02627	snp_synonymous	synonymous	11330
3371	LTEE	Ara-1	50000	REL11330	A	point-mutator	SNP	2804425	2804425	441	2804425	T&rarr;G	<font class=snp_type_nonsynonymous>S147R</font>&nbsp;(AG<font class=mutation_in_codon>T</font>&rarr;AG<font class=mutation_in_codon>G</font>)&nbsp;	barA	barA	<i>barA</i>&nbsp;&rarr;	hybrid sensory histidine kinase, in two-component regulatory system with UvrY	hybrid sensory histidine kinase, in two&#8209;component regulatory system with UvrY	ECB_02631	snp_nonsynonymous	nonsynonymous	11330
3372	LTEE	Ara-1	50000	REL11330	A	point-mutator	SNP	2804511	2804511	527	2804511	A&rarr;C	<font class=snp_type_nonsynonymous>E176A</font>&nbsp;(G<font class=mutation_in_codon>A</font>G&rarr;G<font class=mutation_in_codon>C</font>G)&nbsp;	barA	barA	<i>barA</i>&nbsp;&rarr;	hybrid sensory histidine kinase, in two-component regulatory system with UvrY	hybrid sensory histidine kinase, in two&#8209;component regulatory system with UvrY	ECB_02631	snp_nonsynonymous	nonsynonymous	11330
3373	LTEE	Ara-1	50000	REL11330	A	point-mutator	SNP	2808644	2808644	1032	2808644	A&rarr;C	<font class=snp_type_nonsynonymous>D344E</font>&nbsp;(GA<font class=mutation_in_codon>T</font>&rarr;GA<font class=mutation_in_codon>G</font>)&nbsp;	gudX	gudX	<i>gudX</i>&nbsp;&larr;	predicted glucarate dehydratase	predicted glucarate dehydratase	ECB_02633	snp_nonsynonymous	nonsynonymous	11330
3374	LTEE	Ara-1	50000	REL11330	A	point-mutator	SNP	2809503	2809503	173	2809503	T&rarr;G	<font class=snp_type_nonsynonymous>E58A</font>&nbsp;(G<font class=mutation_in_codon>A</font>G&rarr;G<font class=mutation_in_codon>C</font>G)&nbsp;	gudX	gudX	<i>gudX</i>&nbsp;&larr;	predicted glucarate dehydratase	predicted glucarate dehydratase	ECB_02633	snp_nonsynonymous	nonsynonymous	11330
3375	LTEE	Ara-1	50000	REL11330	A	point-mutator	SNP	2811069	2811069	intergenic (-40/+395)	2811069	T&rarr;G	intergenic&nbsp;(&#8209;40/+395)	gudP,yqcA	gudP/yqcA	<i>gudP</i>&nbsp;&larr;&nbsp;/&nbsp;&larr;&nbsp;<i>yqcA</i>	predicted D-glucarate transporter/flavodoxin	predicted D&#8209;glucarate transporter/flavodoxin	ECB_02634/ECB_02635	snp_intergenic	intergenic	11330
3376	LTEE	Ara-1	50000	REL11330	A	point-mutator	SNP	2812394	2812394	320	2812394	T&rarr;G	<font class=snp_type_nonsynonymous>E107A</font>&nbsp;(G<font class=mutation_in_codon>A</font>A&rarr;G<font class=mutation_in_codon>C</font>A)&nbsp;	yqcB	yqcB	<i>yqcB</i>&nbsp;&larr;	tRNA pseudouridine synthase	tRNA pseudouridine synthase	ECB_02636	snp_nonsynonymous	nonsynonymous	11330
3377	LTEE	Ara-1	50000	REL11330	A	point-mutator	SNP	2813416	2813416	intergenic (-374/+248)	2813416	A&rarr;C	intergenic&nbsp;(&#8209;374/+248)	yqcC,syd	yqcC/syd	<i>yqcC</i>&nbsp;&larr;&nbsp;/&nbsp;&larr;&nbsp;<i>syd</i>	hypothetical protein/SecY interacting protein Syd	hypothetical protein/SecY interacting protein Syd	ECB_02637/ECB_02638	snp_intergenic	intergenic	11330
3378	LTEE	Ara-1	50000	REL11330	A	point-mutator	SNP	2813426	2813426	intergenic (-384/+238)	2813426	T&rarr;G	intergenic&nbsp;(&#8209;384/+238)	yqcC,syd	yqcC/syd	<i>yqcC</i>&nbsp;&larr;&nbsp;/&nbsp;&larr;&nbsp;<i>syd</i>	hypothetical protein/SecY interacting protein Syd	hypothetical protein/SecY interacting protein Syd	ECB_02637/ECB_02638	snp_intergenic	intergenic	11330
3379	LTEE	Ara-1	50000	REL11330	A	point-mutator	SNP	2814362	2814362	86	2814362	T&rarr;G	<font class=snp_type_nonsynonymous>L29R</font>&nbsp;(C<font class=mutation_in_codon>T</font>A&rarr;C<font class=mutation_in_codon>G</font>A)&nbsp;	yqcD	yqcD	<i>yqcD</i>&nbsp;&rarr;	hypothetical protein	hypothetical protein	ECB_02639	snp_nonsynonymous	nonsynonymous	11330
3380	LTEE	Ara-1	50000	REL11330	A	point-mutator	SNP	2815322	2815322	86	2815322	A&rarr;C	<font class=snp_type_nonsynonymous>D29A</font>&nbsp;(G<font class=mutation_in_codon>A</font>C&rarr;G<font class=mutation_in_codon>C</font>C)&nbsp;	ygdH	ygdH	<i>ygdH</i>&nbsp;&rarr;	hypothetical protein	hypothetical protein	ECB_02640	snp_nonsynonymous	nonsynonymous	11330
3381	LTEE	Ara-1	50000	REL11330	A	point-mutator	SNP	2817351	2817351	194	2817351	T&rarr;G	<font class=snp_type_nonsynonymous>F65C</font>&nbsp;(T<font class=mutation_in_codon>T</font>T&rarr;T<font class=mutation_in_codon>G</font>T)&nbsp;	sdaC	sdaC	<i>sdaC</i>&nbsp;&rarr;	predicted serine transporter	predicted serine transporter	ECB_02641	snp_nonsynonymous	nonsynonymous	11330
3382	LTEE	Ara-1	50000	REL11330	A	point-mutator	SNP	2818722	2818722	218	2818722	A&rarr;C	<font class=snp_type_nonsynonymous>N73T</font>&nbsp;(A<font class=mutation_in_codon>A</font>C&rarr;A<font class=mutation_in_codon>C</font>C)&nbsp;	sdaB	sdaB	<i>sdaB</i>&nbsp;&rarr;	L-serine deaminase II	L&#8209;serine deaminase II	ECB_02642	snp_nonsynonymous	nonsynonymous	11330
3383	LTEE	Ara-1	50000	REL11330	A	point-mutator	SNP	2824580	2824580	intergenic (-109/+10)	2824580	A&rarr;C	intergenic&nbsp;(&#8209;109/+10)	ECB_02648,ECB_02649	ECB_02648/ECB_02649	<i>ECB_02648</i>&nbsp;&larr;&nbsp;/&nbsp;&larr;&nbsp;<i>ECB_02649</i>	L-fuculose phosphate aldolase/protein similar to L-ribulokinase AraB	L&#8209;fuculose phosphate aldolase/protein similar to L&#8209;ribulokinase AraB	ECB_02648/ECB_02649	snp_intergenic	intergenic	11330
3384	LTEE	Ara-1	50000	REL11330	A	point-mutator	SNP	2826819	2826819	478	2826819	A&rarr;C	<font class=snp_type_nonsynonymous>S160A</font>&nbsp;(<font class=mutation_in_codon>T</font>CA&rarr;<font class=mutation_in_codon>G</font>CA)&nbsp;	ECB_02650	ECB_02650	<i>ECB_02650</i>&nbsp;&larr;	D-ribose-binding periplasmic protein	D&#8209;ribose&#8209;binding periplasmic protein	ECB_02650	snp_nonsynonymous	nonsynonymous	11330
3385	LTEE	Ara-1	50000	REL11330	A	point-mutator	SNP	2831467	2831467	1265	2831467	A&rarr;C	<font class=snp_type_nonsynonymous>Q422P</font>&nbsp;(C<font class=mutation_in_codon>A</font>A&rarr;C<font class=mutation_in_codon>C</font>A)&nbsp;	fucI	fucI	<i>fucI</i>&nbsp;&rarr;	L-fucose isomerase	L&#8209;fucose isomerase	ECB_02653	snp_nonsynonymous	nonsynonymous	11330
3386	LTEE	Ara-1	50000	REL11330	A	point-mutator	SNP	2832497	2832497	441	2832497	A&rarr;C	<font class=snp_type_nonsynonymous>L147F</font>&nbsp;(TT<font class=mutation_in_codon>A</font>&rarr;TT<font class=mutation_in_codon>C</font>)&nbsp;	fucK	fucK	<i>fucK</i>&nbsp;&rarr;	L-fuculokinase	L&#8209;fuculokinase	ECB_02654	snp_nonsynonymous	nonsynonymous	11330
3387	LTEE	Ara-1	50000	REL11330	A	point-mutator	SNP	2837245	2837245	intergenic (-59/+292)	2837245	T&rarr;G	intergenic&nbsp;(&#8209;59/+292)	gcvA,ygdI	gcvA/ygdI	<i>gcvA</i>&nbsp;&larr;&nbsp;/&nbsp;&larr;&nbsp;<i>ygdI</i>	DNA-binding transcriptional dual regulator/hypothetical protein	DNA&#8209;binding transcriptional dual regulator/hypothetical protein	ECB_02659/ECB_02660	snp_intergenic	intergenic	11330
3388	LTEE	Ara-1	50000	REL11330	A	point-mutator	SNP	2837626	2837626	139	2837626	T&rarr;G	<font class=snp_type_nonsynonymous>T47P</font>&nbsp;(<font class=mutation_in_codon>A</font>CC&rarr;<font class=mutation_in_codon>C</font>CC)&nbsp;	ygdI	ygdI	<i>ygdI</i>&nbsp;&larr;	hypothetical protein	hypothetical protein	ECB_02660	snp_nonsynonymous	nonsynonymous	11330
3389	LTEE	Ara-1	50000	REL11330	A	point-mutator	SNP	2839145	2839145	1190	2839145	A&rarr;C	<font class=snp_type_nonsynonymous>E397A</font>&nbsp;(G<font class=mutation_in_codon>A</font>A&rarr;G<font class=mutation_in_codon>C</font>A)&nbsp;	csdA	csdA	<i>csdA</i>&nbsp;&rarr;	cysteine sulfinate desulfinase	cysteine sulfinate desulfinase	ECB_02661	snp_nonsynonymous	nonsynonymous	11330
3390	LTEE	Ara-1	50000	REL11330	A	point-mutator	SNP	2840075	2840075	387	2840075	A&rarr;C	<font class=snp_type_nonsynonymous>I129M</font>&nbsp;(AT<font class=mutation_in_codon>T</font>&rarr;AT<font class=mutation_in_codon>G</font>)&nbsp;	ygdL	ygdL	<i>ygdL</i>&nbsp;&larr;	hypothetical protein	hypothetical protein	ECB_02663	snp_nonsynonymous	nonsynonymous	11330
3391	LTEE	Ara-1	50000	REL11330	A	point-mutator	SNP	2843663	2843663	intergenic (-34/-198)	2843663	A&rarr;C	intergenic&nbsp;(&#8209;34/&#8209;198)	amiC,argA	amiC/argA	<i>amiC</i>&nbsp;&larr;&nbsp;/&nbsp;&rarr;&nbsp;<i>argA</i>	N-acetylmuramoyl-L-alanine amidase/N-acetylglutamate synthase	N&#8209;acetylmuramoyl&#8209;L&#8209;alanine amidase/N&#8209;acetylglutamate synthase	ECB_02665/ECB_02666	snp_intergenic	intergenic	11330
3392	LTEE	Ara-1	50000	REL11330	A	point-mutator	SNP	2850878	2850878	2626	2850878	A&rarr;C	<font class=snp_type_nonsynonymous>L876V</font>&nbsp;(<font class=mutation_in_codon>T</font>TA&rarr;<font class=mutation_in_codon>G</font>TA)&nbsp;	ptr	ptr	<i>ptr</i>&nbsp;&larr;	protease III	protease III	ECB_02669	snp_nonsynonymous	nonsynonymous	11330
3393	LTEE	Ara-1	50000	REL11330	A	point-mutator	SNP	2851294	2851294	2210	2851294	A&rarr;C	<font class=snp_type_nonsynonymous>V737G</font>&nbsp;(G<font class=mutation_in_codon>T</font>A&rarr;G<font class=mutation_in_codon>G</font>A)&nbsp;	ptr	ptr	<i>ptr</i>&nbsp;&larr;	protease III	protease III	ECB_02669	snp_nonsynonymous	nonsynonymous	11330
3394	LTEE	Ara-1	50000	REL11330	A	point-mutator	SNP	2851610	2851610	1894	2851610	C&rarr;A	<font class=snp_type_nonsynonymous>D632Y</font>&nbsp;(<font class=mutation_in_codon>G</font>AT&rarr;<font class=mutation_in_codon>T</font>AT)&nbsp;	ptr	ptr	<i>ptr</i>&nbsp;&larr;	protease III	protease III	ECB_02669	snp_nonsynonymous	nonsynonymous	11330
3395	LTEE	Ara-1	50000	REL11330	A	point-mutator	SNP	2853864	2853864	3184	2853864	A&rarr;C	<font class=snp_type_nonsynonymous>S1062A</font>&nbsp;(<font class=mutation_in_codon>T</font>CC&rarr;<font class=mutation_in_codon>G</font>CC)&nbsp;	recC	recC	<i>recC</i>&nbsp;&larr;	exonuclease V (RecBCD complex), gamma chain	exonuclease V (RecBCD complex), gamma chain	ECB_02670	snp_nonsynonymous	nonsynonymous	11330
3396	LTEE	Ara-1	50000	REL11330	A	point-mutator	SNP	2858687	2858687	110	2858687	T&rarr;G	<font class=snp_type_nonsynonymous>Q37P</font>&nbsp;(C<font class=mutation_in_codon>A</font>A&rarr;C<font class=mutation_in_codon>C</font>A)&nbsp;	ppdA	ppdA	<i>ppdA</i>&nbsp;&larr;	hypothetical protein	hypothetical protein	ECB_02674	snp_nonsynonymous	nonsynonymous	11330
3397	LTEE	Ara-1	50000	REL11330	A	point-mutator	SNP	2858895	2858895	intergenic (-99/+86)	2858895	A&rarr;C	intergenic&nbsp;(&#8209;99/+86)	ppdA,thyA	ppdA/thyA	<i>ppdA</i>&nbsp;&larr;&nbsp;/&nbsp;&larr;&nbsp;<i>thyA</i>	hypothetical protein/thymidylate synthase	hypothetical protein/thymidylate synthase	ECB_02674/ECB_02675	snp_intergenic	intergenic	11330
3398	LTEE	Ara-1	50000	REL11330	A	point-mutator	SNP	2861475	2861475	1580	2861475	A&rarr;C	<font class=snp_type_nonsynonymous>I527S</font>&nbsp;(A<font class=mutation_in_codon>T</font>T&rarr;A<font class=mutation_in_codon>G</font>T)&nbsp;	ptsP	ptsP	<i>ptsP</i>&nbsp;&larr;	fused PTS enzyme: PEP-protein phosphotransferase (enzyme I)/GAF domain containing protein	fused PTS enzyme: PEP&#8209;protein phosphotransferase (enzyme I)/GAF domain containing protein	ECB_02677	snp_nonsynonymous	nonsynonymous	11330
3399	LTEE	Ara-1	50000	REL11330	A	point-mutator	SNP	2863851	2863851	intergenic (-254/-431)	2863851	A&rarr;C	intergenic&nbsp;(&#8209;254/&#8209;431)	ygdP,mutH	ygdP/mutH	<i>ygdP</i>&nbsp;&larr;&nbsp;/&nbsp;&rarr;&nbsp;<i>mutH</i>	dinucleoside polyphosphate hydrolase/DNA mismatch repair protein	dinucleoside polyphosphate hydrolase/DNA mismatch repair protein	ECB_02678/ECB_02679	snp_intergenic	intergenic	11330
3400	LTEE	Ara-1	50000	REL11330	A	point-mutator	SNP	2870517	2870517	118	2870517	T&rarr;G	<font class=snp_type_nonsynonymous>I40L</font>&nbsp;(<font class=mutation_in_codon>A</font>TT&rarr;<font class=mutation_in_codon>C</font>TT)&nbsp;	aas	aas	<i>aas</i>&nbsp;&larr;	2-acyl-glycerophospho-ethanolamine acyltransferase	2&#8209;acyl&#8209;glycerophospho&#8209;ethanolamine acyltransferase	ECB_02684	snp_nonsynonymous	nonsynonymous	11330
3401	LTEE	Ara-1	50000	REL11330	A	point-mutator	SUB	2872249	2872250	coding (1030-1031/1032 nt)	2872249	2&nbsp;bp&rarr;GC	coding&nbsp;(1030&#8209;1031/1032&nbsp;nt)	galR	galR	<i>galR</i>&nbsp;&rarr;	DNA-binding transcriptional repressor	DNA&#8209;binding transcriptional repressor	ECB_02685	small_indel	not_snp	11330
3402	LTEE	Ara-1	50000	REL11330	A	point-mutator	SNP	2873513	2873513	8	2873513	T&rarr;G	<font class=snp_type_nonsynonymous>H3P</font>&nbsp;(C<font class=mutation_in_codon>A</font>T&rarr;C<font class=mutation_in_codon>C</font>T)&nbsp;	lysA	lysA	<i>lysA</i>&nbsp;&larr;	diaminopimelate decarboxylase, PLP-binding	diaminopimelate decarboxylase, PLP&#8209;binding	ECB_02686	snp_nonsynonymous	nonsynonymous	11330
3403	LTEE	Ara-1	50000	REL11330	A	point-mutator	MOB	2877312	2877315	coding (565-568/762 nt)	2877312	IS<i>150</i>&nbsp;(+)&nbsp;+4&nbsp;bp	coding&nbsp;(565&#8209;568/762&nbsp;nt)	kduD	kduD	<i>kduD</i>&nbsp;&larr;	2-deoxy-D-gluconate 3-dehydrogenase	2&#8209;deoxy&#8209;D&#8209;gluconate 3&#8209;dehydrogenase	ECB_02690	mobile_element_insertion	not_snp	11330
3404	LTEE	Ara-1	50000	REL11330	A	point-mutator	SNP	2886673	2886673	574	2886673	T&rarr;G	<font class=snp_type_nonsynonymous>W192G</font>&nbsp;(<font class=mutation_in_codon>T</font>GG&rarr;<font class=mutation_in_codon>G</font>GG)&nbsp;	xdhA	xdhA	<i>xdhA</i>&nbsp;&rarr;	xanthine dehydrogenase, molybdenum binding subunit	xanthine dehydrogenase, molybdenum binding subunit	ECB_02699	snp_nonsynonymous	nonsynonymous	11330
3405	LTEE	Ara-1	50000	REL11330	A	point-mutator	SNP	2887166	2887166	1067	2887166	A&rarr;C	<font class=snp_type_nonsynonymous>Q356P</font>&nbsp;(C<font class=mutation_in_codon>A</font>A&rarr;C<font class=mutation_in_codon>C</font>A)&nbsp;	xdhA	xdhA	<i>xdhA</i>&nbsp;&rarr;	xanthine dehydrogenase, molybdenum binding subunit	xanthine dehydrogenase, molybdenum binding subunit	ECB_02699	snp_nonsynonymous	nonsynonymous	11330
3406	LTEE	Ara-1	50000	REL11330	A	point-mutator	SNP	2887926	2887926	1827	2887926	T&rarr;G	<font class=snp_type_nonsynonymous>F609L</font>&nbsp;(TT<font class=mutation_in_codon>T</font>&rarr;TT<font class=mutation_in_codon>G</font>)&nbsp;	xdhA	xdhA	<i>xdhA</i>&nbsp;&rarr;	xanthine dehydrogenase, molybdenum binding subunit	xanthine dehydrogenase, molybdenum binding subunit	ECB_02699	snp_nonsynonymous	nonsynonymous	11330
3407	LTEE	Ara-1	50000	REL11330	A	point-mutator	SNP	2892605	2892605	589	2892605	T&rarr;G	<font class=snp_type_nonsynonymous>Y197D</font>&nbsp;(<font class=mutation_in_codon>T</font>AC&rarr;<font class=mutation_in_codon>G</font>AC)&nbsp;	ygeW	ygeW	<i>ygeW</i>&nbsp;&rarr;	hypothetical protein	hypothetical protein	ECB_02703	snp_nonsynonymous	nonsynonymous	11330
3408	LTEE	Ara-1	50000	REL11330	A	point-mutator	SNP	2898260	2898260	intergenic (+112/+109)	2898260	T&rarr;G	intergenic&nbsp;(+112/+109)	yqeA,yqeB	yqeA/yqeB	<i>yqeA</i>&nbsp;&rarr;&nbsp;/&nbsp;&larr;&nbsp;<i>yqeB</i>	predicted amino acid kinase/conserved protein with NAD(P)-binding Rossman fold	predicted amino acid kinase/conserved protein with NAD(P)&#8209;binding Rossman fold	ECB_02707/ECB_02708	snp_intergenic	intergenic	11330
3409	LTEE	Ara-1	50000	REL11330	A	point-mutator	SNP	2903426	2903426	1613	2903426	A&rarr;C	<font class=snp_type_nonsynonymous>K538T</font>&nbsp;(A<font class=mutation_in_codon>A</font>G&rarr;A<font class=mutation_in_codon>C</font>G)&nbsp;	ygfK	ygfK	<i>ygfK</i>&nbsp;&rarr;	predicted oxidoreductase, Fe-S subunit	predicted oxidoreductase, Fe&#8209;S subunit	ECB_02711	snp_nonsynonymous	nonsynonymous	11330
3410	LTEE	Ara-1	50000	REL11330	A	point-mutator	SNP	2921752	2921752	208	2921752	T&rarr;G	<font class=snp_type_nonsynonymous>T95P</font>&nbsp;(<font class=mutation_in_codon>A</font>CC&rarr;<font class=mutation_in_codon>C</font>CC)&nbsp;	prfB	prfB	<i>prfB</i>&nbsp;&larr;	peptide chain release factor 2	peptide chain release factor 2	ECB_02723	snp_nonsynonymous	nonsynonymous	11330
3411	LTEE	Ara-1	50000	REL11330	A	point-mutator	SNP	2924475	2924475	101	2924475	A&rarr;C	<font class=snp_type_nonsynonymous>I34S</font>&nbsp;(A<font class=mutation_in_codon>T</font>C&rarr;A<font class=mutation_in_codon>G</font>C)&nbsp;	dsbC	dsbC	<i>dsbC</i>&nbsp;&larr;	protein disulfide isomerase II	protein disulfide isomerase II	ECB_02725	snp_nonsynonymous	nonsynonymous	11330
3412	LTEE	Ara-1	50000	REL11330	A	point-mutator	SNP	2925198	2925198	299	2925198	A&rarr;C	<font class=snp_type_nonsynonymous>L100R</font>&nbsp;(C<font class=mutation_in_codon>T</font>C&rarr;C<font class=mutation_in_codon>G</font>C)&nbsp;	xerD	xerD	<i>xerD</i>&nbsp;&larr;	site-specific tyrosine recombinase XerD	site&#8209;specific tyrosine recombinase XerD	ECB_02726	snp_nonsynonymous	nonsynonymous	11330
3413	LTEE	Ara-1	50000	REL11330	A	point-mutator	SNP	2926721	2926721	103	2926721	A&rarr;C	<font class=snp_type_nonsynonymous>L35V</font>&nbsp;(<font class=mutation_in_codon>T</font>TA&rarr;<font class=mutation_in_codon>G</font>TA)&nbsp;	ygfY	ygfY	<i>ygfY</i>&nbsp;&larr;	hypothetical protein	hypothetical protein	ECB_02729	snp_nonsynonymous	nonsynonymous	11330
3414	LTEE	Ara-1	50000	REL11330	A	point-mutator	SNP	2929706	2929706	292	2929706	T&rarr;G	<font class=snp_type_nonsynonymous>F98V</font>&nbsp;(<font class=mutation_in_codon>T</font>TT&rarr;<font class=mutation_in_codon>G</font>TT)&nbsp;	bglA	bglA	<i>bglA</i>&nbsp;&rarr;	6-phospho-beta-glucosidase A	6&#8209;phospho&#8209;beta&#8209;glucosidase A	ECB_02733	snp_nonsynonymous	nonsynonymous	11330
3415	LTEE	Ara-1	50000	REL11330	A	point-mutator	SNP	2937857	2937857	212	2937857	A&rarr;C	<font class=snp_type_nonsynonymous>L71R</font>&nbsp;(C<font class=mutation_in_codon>T</font>C&rarr;C<font class=mutation_in_codon>G</font>C)&nbsp;	visC	visC	<i>visC</i>&nbsp;&larr;	hypothetical protein	hypothetical protein	ECB_02738	snp_nonsynonymous	nonsynonymous	11330
3416	LTEE	Ara-1	50000	REL11330	A	point-mutator	SNP	2939257	2939257	13	2939257	T&rarr;G	<font class=snp_type_nonsynonymous>I5L</font>&nbsp;(<font class=mutation_in_codon>A</font>TC&rarr;<font class=mutation_in_codon>C</font>TC)&nbsp;	ubiH	ubiH	<i>ubiH</i>&nbsp;&larr;	2-octaprenyl-6-methoxyphenyl hydroxylase	2&#8209;octaprenyl&#8209;6&#8209;methoxyphenyl hydroxylase	ECB_02739	snp_nonsynonymous	nonsynonymous	11330
3417	LTEE	Ara-1	50000	REL11330	A	point-mutator	SNP	2948361	2948361	1761	2948361	T&rarr;G	<font class=snp_type_nonsynonymous>I587M</font>&nbsp;(AT<font class=mutation_in_codon>T</font>&rarr;AT<font class=mutation_in_codon>G</font>)&nbsp;	sbm	sbm	<i>sbm</i>&nbsp;&rarr;	methylmalonyl-CoA mutase	methylmalonyl&#8209;CoA mutase	ECB_02748	snp_nonsynonymous	nonsynonymous	11330
3418	LTEE	Ara-1	50000	REL11330	A	point-mutator	SNP	2948477	2948477	1877	2948477	A&rarr;C	<font class=snp_type_nonsynonymous>E626A</font>&nbsp;(G<font class=mutation_in_codon>A</font>G&rarr;G<font class=mutation_in_codon>C</font>G)&nbsp;	sbm	sbm	<i>sbm</i>&nbsp;&rarr;	methylmalonyl-CoA mutase	methylmalonyl&#8209;CoA mutase	ECB_02748	snp_nonsynonymous	nonsynonymous	11330
3419	LTEE	Ara-1	50000	REL11330	A	point-mutator	SNP	2948714	2948714	2114	2948714	T&rarr;G	<font class=snp_type_nonsynonymous>V705G</font>&nbsp;(G<font class=mutation_in_codon>T</font>A&rarr;G<font class=mutation_in_codon>G</font>A)&nbsp;	sbm	sbm	<i>sbm</i>&nbsp;&rarr;	methylmalonyl-CoA mutase	methylmalonyl&#8209;CoA mutase	ECB_02748	snp_nonsynonymous	nonsynonymous	11330
3420	LTEE	Ara-1	50000	REL11330	A	point-mutator	SNP	2952759	2952759	166	2952759	T&rarr;G	<font class=snp_type_nonsynonymous>N56H</font>&nbsp;(<font class=mutation_in_codon>A</font>AT&rarr;<font class=mutation_in_codon>C</font>AT)&nbsp;	ygfI	ygfI	<i>ygfI</i>&nbsp;&larr;	predicted DNA-binding transcriptional regulator	predicted DNA&#8209;binding transcriptional regulator	ECB_02752	snp_nonsynonymous	nonsynonymous	11330
3421	LTEE	Ara-1	50000	REL11330	A	point-mutator	SNP	2955191	2955191	368	2955191	A&rarr;C	<font class=snp_type_nonsense>L123*</font>&nbsp;(T<font class=mutation_in_codon>T</font>A&rarr;T<font class=mutation_in_codon>G</font>A)&nbsp;	yggB	yggB	<i>yggB</i>&nbsp;&larr;	mechanosensitive channel	mechanosensitive channel	ECB_02755	snp_nonsense	nonsense	11330
3422	LTEE	Ara-1	50000	REL11330	A	point-mutator	SNP	2960135	2960135	306	2960135	T&rarr;G	<font class=snp_type_synonymous>A102A</font>&nbsp;(GC<font class=mutation_in_codon>A</font>&rarr;GC<font class=mutation_in_codon>C</font>)&nbsp;	yggC	yggC	<i>yggC</i>&nbsp;&larr;	hypothetical protein	hypothetical protein	ECB_02759	snp_synonymous	synonymous	11330
3423	LTEE	Ara-1	50000	REL11330	A	point-mutator	SNP	2961482	2961482	452	2961482	T&rarr;G	<font class=snp_type_nonsynonymous>K151T</font>&nbsp;(A<font class=mutation_in_codon>A</font>A&rarr;A<font class=mutation_in_codon>C</font>A)&nbsp;	yggF	yggF	<i>yggF</i>&nbsp;&larr;	predicted hexoseP phosphatase	predicted hexoseP phosphatase	ECB_02761	snp_nonsynonymous	nonsynonymous	11330
3424	LTEE	Ara-1	50000	REL11330	A	point-mutator	SNP	2962850	2962850	358	2962850	T&rarr;G	<font class=snp_type_nonsynonymous>I120L</font>&nbsp;(<font class=mutation_in_codon>A</font>TT&rarr;<font class=mutation_in_codon>C</font>TT)&nbsp;	yggP	yggP	<i>yggP</i>&nbsp;&larr;	predicted dehydrogenase	predicted dehydrogenase	ECB_02762	snp_nonsynonymous	nonsynonymous	11330
3425	LTEE	Ara-1	50000	REL11330	A	point-mutator	SNP	2978466	2978466	838	2978466	A&rarr;C	<font class=snp_type_nonsynonymous>T280P</font>&nbsp;(<font class=mutation_in_codon>A</font>CT&rarr;<font class=mutation_in_codon>C</font>CT)&nbsp;	gshB	gshB	<i>gshB</i>&nbsp;&rarr;	glutathione synthetase	glutathione synthetase	ECB_02777	snp_nonsynonymous	nonsynonymous	11330
3426	LTEE	Ara-1	50000	REL11330	A	point-mutator	SNP	2981152	2981152	304	2981152	A&rarr;C	<font class=snp_type_nonsynonymous>T102P</font>&nbsp;(<font class=mutation_in_codon>A</font>CC&rarr;<font class=mutation_in_codon>C</font>CC)&nbsp;	yggS	yggS	<i>yggS</i>&nbsp;&rarr;	predicted enzyme	predicted enzyme	ECB_02781	snp_nonsynonymous	nonsynonymous	11330
3427	LTEE	Ara-1	50000	REL11330	A	point-mutator	SNP	2989164	2989164	491	2989164	T&rarr;G	<font class=snp_type_nonsense>L164*</font>&nbsp;(T<font class=mutation_in_codon>T</font>A&rarr;T<font class=mutation_in_codon>G</font>A)&nbsp;	mutY	mutY	<i>mutY</i>&nbsp;&rarr;	adenine DNA glycosylase	adenine DNA glycosylase	ECB_02791	snp_nonsense	nonsense	11330
3428	LTEE	Ara-1	50000	REL11330	A	point-mutator	SNP	2992993	2992993	1823	2992993	A&rarr;C	<font class=snp_type_nonsynonymous>F608C</font>&nbsp;(T<font class=mutation_in_codon>T</font>C&rarr;T<font class=mutation_in_codon>G</font>C)&nbsp;	speC	speC	<i>speC</i>&nbsp;&larr;	ornithine decarboxylase, constitutive	ornithine decarboxylase, constitutive	ECB_02795	snp_nonsynonymous	nonsynonymous	11330
3429	LTEE	Ara-1	50000	REL11330	A	point-mutator	SNP	2997228	2997228	860	2997228	T&rarr;G	<font class=snp_type_nonsynonymous>I287S</font>&nbsp;(A<font class=mutation_in_codon>T</font>T&rarr;A<font class=mutation_in_codon>G</font>T)&nbsp;	ECB_02797	ECB_02797	<i>ECB_02797</i>&nbsp;&rarr;	integrase	integrase	ECB_02797	snp_nonsynonymous	nonsynonymous	11330
3430	LTEE	Ara-1	50000	REL11330	A	point-mutator	SNP	3003420	3003420	890	3003420	A&rarr;C	<font class=snp_type_nonsynonymous>E297A</font>&nbsp;(G<font class=mutation_in_codon>A</font>A&rarr;G<font class=mutation_in_codon>C</font>A)&nbsp;	yeeR	yeeR	<i>yeeR</i>&nbsp;&rarr;	predicted membrane protein	predicted membrane protein	ECB_02801	snp_nonsynonymous	nonsynonymous	11330
3431	LTEE	Ara-1	50000	REL11330	A	point-mutator	SNP	3006683	3006683	693	3006683	A&rarr;C	<font class=snp_type_synonymous>G231G</font>&nbsp;(GG<font class=mutation_in_codon>A</font>&rarr;GG<font class=mutation_in_codon>C</font>)&nbsp;	yafZ	yafZ	<i>yafZ</i>&nbsp;&rarr;	conserved protein	conserved protein	ECB_02803	snp_synonymous	synonymous	11330
3432	LTEE	Ara-1	50000	REL11330	A	point-mutator	SNP	3012244	3012244	111	3012244	T&rarr;G	<font class=snp_type_synonymous>V37V</font>&nbsp;(GT<font class=mutation_in_codon>T</font>&rarr;GT<font class=mutation_in_codon>G</font>)&nbsp;	ECB_02813	ECB_02813	<i>ECB_02813</i>&nbsp;&rarr;	hypothetical protein	hypothetical protein	ECB_02813	snp_synonymous	synonymous	11330
3433	LTEE	Ara-1	50000	REL11330	A	point-mutator	MOB	3015771	3015774	coding (1192-1195/1677 nt)	3015771	IS<i>150</i>&nbsp;(&#8211;)&nbsp;+4&nbsp;bp	coding&nbsp;(1192&#8209;1195/1677&nbsp;nt)	ECB_02816	ECB_02816	<i>ECB_02816</i>&nbsp;&rarr;	KpsD protein	KpsD protein	ECB_02816	mobile_element_insertion	not_snp	11330
3434	LTEE	Ara-1	50000	REL11330	A	point-mutator	SNP	3016033	3016033	1454	3016033	T&rarr;G	<font class=snp_type_nonsynonymous>I485S</font>&nbsp;(A<font class=mutation_in_codon>T</font>C&rarr;A<font class=mutation_in_codon>G</font>C)&nbsp;	ECB_02816	ECB_02816	<i>ECB_02816</i>&nbsp;&rarr;	KpsD protein	KpsD protein	ECB_02816	snp_nonsynonymous	nonsynonymous	11330
3435	LTEE	Ara-1	50000	REL11330	A	point-mutator	SNP	3027683	3027683	intergenic (-13/+2)	3027683	A&rarr;C	intergenic&nbsp;(&#8209;13/+2)	ECB_02827,ECB_02828	ECB_02827/ECB_02828	<i>ECB_02827</i>&nbsp;&larr;&nbsp;/&nbsp;&larr;&nbsp;<i>ECB_02828</i>	Polysialic acid transport ATP-binding KpsT/Polysialic acid transport protein kpsM	Polysialic acid transport ATP&#8209;binding KpsT/Polysialic acid transport protein kpsM	ECB_02827/ECB_02828	snp_intergenic	intergenic	11330
3436	LTEE	Ara-1	50000	REL11330	A	point-mutator	SNP	3030817	3030817	pseudogene (104/861 nt)	3030817	A&rarr;C	pseudogene&nbsp;(104/861&nbsp;nt)	yghE	yghE	<i>yghE</i>&nbsp;&larr;	b2969; predicted secretion pathway protein, L-type protein	b2969; predicted secretion pathway protein, L&#8209;type protein	ECB_02830	snp_pseudogene	pseudogene	11330
3437	LTEE	Ara-1	50000	REL11330	A	point-mutator	SNP	3031898	3031898	273	3031898	A&rarr;C	<font class=snp_type_nonsynonymous>F91L</font>&nbsp;(TT<font class=mutation_in_codon>T</font>&rarr;TT<font class=mutation_in_codon>G</font>)&nbsp;	ECB_02831	ECB_02831	<i>ECB_02831</i>&nbsp;&larr;	hypothetical type II secretion protein GspK	hypothetical type II secretion protein GspK	ECB_02831	snp_nonsynonymous	nonsynonymous	11330
3438	LTEE	Ara-1	50000	REL11330	A	point-mutator	SNP	3034432	3034432	1010	3034432	A&rarr;C	<font class=snp_type_nonsynonymous>L337R</font>&nbsp;(C<font class=mutation_in_codon>T</font>G&rarr;C<font class=mutation_in_codon>G</font>G)&nbsp;	ECB_02836	ECB_02836	<i>ECB_02836</i>&nbsp;&larr;	hypothetical type II secretion protein GspF	hypothetical type II secretion protein GspF	ECB_02836	snp_nonsynonymous	nonsynonymous	11330
3439	LTEE	Ara-1	50000	REL11330	A	point-mutator	SNP	3039830	3039830	25	3039830	T&rarr;G	<font class=snp_type_nonsynonymous>I9L</font>&nbsp;(<font class=mutation_in_codon>A</font>TT&rarr;<font class=mutation_in_codon>C</font>TT)&nbsp;	yghF	yghF	<i>yghF</i>&nbsp;&larr;	predicted secretion pathway protein, C-type protein	predicted secretion pathway protein, C&#8209;type protein	ECB_02839	snp_nonsynonymous	nonsynonymous	11330
3440	LTEE	Ara-1	50000	REL11330	A	point-mutator	SNP	3040080	3040080	332	3040080	A&rarr;C	<font class=snp_type_nonsynonymous>I111R</font>&nbsp;(A<font class=mutation_in_codon>T</font>A&rarr;A<font class=mutation_in_codon>G</font>A)&nbsp;	yghG	yghG	<i>yghG</i>&nbsp;&larr;	hypothetical protein	hypothetical protein	ECB_02840	snp_nonsynonymous	nonsynonymous	11330
3441	LTEE	Ara-1	50000	REL11330	A	point-mutator	SNP	3042182	3042182	3822	3042182	A&rarr;C	<font class=snp_type_synonymous>G1274G</font>&nbsp;(GG<font class=mutation_in_codon>T</font>&rarr;GG<font class=mutation_in_codon>G</font>)&nbsp;	yghJ	yghJ	<i>yghJ</i>&nbsp;&larr;	predicted inner membrane lipoprotein	predicted inner membrane lipoprotein	ECB_02842	snp_synonymous	synonymous	11330
3442	LTEE	Ara-1	50000	REL11330	A	point-mutator	SNP	3045069	3045069	935	3045069	G&rarr;T	<font class=snp_type_nonsynonymous>T312N</font>&nbsp;(A<font class=mutation_in_codon>C</font>C&rarr;A<font class=mutation_in_codon>A</font>C)&nbsp;	yghJ	yghJ	<i>yghJ</i>&nbsp;&larr;	predicted inner membrane lipoprotein	predicted inner membrane lipoprotein	ECB_02842	snp_nonsynonymous	nonsynonymous	11330
3443	LTEE	Ara-1	50000	REL11330	A	point-mutator	SNP	3046426	3046426	intergenic (-423/+63)	3046426	T&rarr;G	intergenic&nbsp;(&#8209;423/+63)	yghJ,yghK	yghJ/yghK	<i>yghJ</i>&nbsp;&larr;&nbsp;/&nbsp;&larr;&nbsp;<i>yghK</i>	predicted inner membrane lipoprotein/glycolate transporter	predicted inner membrane lipoprotein/glycolate transporter	ECB_02842/ECB_02843	snp_intergenic	intergenic	11330
3444	LTEE	Ara-1	50000	REL11330	A	point-mutator	SNP	3047185	3047185	987	3047185	A&rarr;C	<font class=snp_type_nonsynonymous>F329L</font>&nbsp;(TT<font class=mutation_in_codon>T</font>&rarr;TT<font class=mutation_in_codon>G</font>)&nbsp;	yghK	yghK	<i>yghK</i>&nbsp;&larr;	glycolate transporter	glycolate transporter	ECB_02843	snp_nonsynonymous	nonsynonymous	11330
3445	LTEE	Ara-1	50000	REL11330	A	point-mutator	SNP	3051023	3051023	101	3051023	A&rarr;C	<font class=snp_type_nonsynonymous>V34G</font>&nbsp;(G<font class=mutation_in_codon>T</font>T&rarr;G<font class=mutation_in_codon>G</font>T)&nbsp;	glcG	glcG	<i>glcG</i>&nbsp;&larr;	hypothetical protein	hypothetical protein	ECB_02845	snp_nonsynonymous	nonsynonymous	11330
3446	LTEE	Ara-1	50000	REL11330	A	point-mutator	SNP	3057690	3057690	246	3057690	A&rarr;C	<font class=snp_type_nonsynonymous>E82D</font>&nbsp;(GA<font class=mutation_in_codon>A</font>&rarr;GA<font class=mutation_in_codon>C</font>)&nbsp;	ECB_02851	ECB_02851	<i>ECB_02851</i>&nbsp;&rarr;	putative saframycin Mx1 synthetase B	putative saframycin Mx1 synthetase B	ECB_02851	snp_nonsynonymous	nonsynonymous	11330
3447	LTEE	Ara-1	50000	REL11330	A	point-mutator	SNP	3075959	3075959	1118	3075959	T&rarr;G	<font class=snp_type_nonsynonymous>K373T</font>&nbsp;(A<font class=mutation_in_codon>A</font>A&rarr;A<font class=mutation_in_codon>C</font>A)&nbsp;	hybC	hybC	<i>hybC</i>&nbsp;&larr;	hydrogenase 2, large subunit	hydrogenase 2, large subunit	ECB_02870	snp_nonsynonymous	nonsynonymous	11330
3448	LTEE	Ara-1	50000	REL11330	A	point-mutator	SNP	3081137	3081137	653	3081137	T&rarr;G	<font class=snp_type_nonsynonymous>Y218S</font>&nbsp;(T<font class=mutation_in_codon>A</font>T&rarr;T<font class=mutation_in_codon>C</font>T)&nbsp;	yghXY	yghXY	<i>yghXY</i>&nbsp;&larr;	predicted hydrolase	predicted hydrolase	ECB_02875	snp_nonsynonymous	nonsynonymous	11330
3449	LTEE	Ara-1	50000	REL11330	A	point-mutator	SNP	3084190	3084190	357	3084190	T&rarr;G	<font class=snp_type_synonymous>V119V</font>&nbsp;(GT<font class=mutation_in_codon>T</font>&rarr;GT<font class=mutation_in_codon>G</font>)&nbsp;	yghA	yghA	<i>yghA</i>&nbsp;&rarr;	oxidoreductase	oxidoreductase	ECB_02878	snp_synonymous	synonymous	11330
3450	LTEE	Ara-1	50000	REL11330	A	point-mutator	SNP	3084257	3084257	424	3084257	A&rarr;C	<font class=snp_type_nonsynonymous>I142L</font>&nbsp;(<font class=mutation_in_codon>A</font>TT&rarr;<font class=mutation_in_codon>C</font>TT)&nbsp;	yghA	yghA	<i>yghA</i>&nbsp;&rarr;	oxidoreductase	oxidoreductase	ECB_02878	snp_nonsynonymous	nonsynonymous	11330
3451	LTEE	Ara-1	50000	REL11330	A	point-mutator	SNP	3089302	3089302	89	3089302	G&rarr;T	<font class=snp_type_nonsynonymous>A30E</font>&nbsp;(G<font class=mutation_in_codon>C</font>G&rarr;G<font class=mutation_in_codon>A</font>G)&nbsp;	yqhC	yqhC	<i>yqhC</i>&nbsp;&larr;	predicted DNA-binding transcriptional regulator	predicted DNA&#8209;binding transcriptional regulator	ECB_02883	snp_nonsynonymous	nonsynonymous	11330
3452	LTEE	Ara-1	50000	REL11330	A	point-mutator	SNP	3092844	3092844	46	3092844	T&rarr;G	<font class=snp_type_nonsynonymous>L16V</font>&nbsp;(<font class=mutation_in_codon>T</font>TG&rarr;<font class=mutation_in_codon>G</font>TG)&nbsp;	yqhH	yqhH	<i>yqhH</i>&nbsp;&rarr;	predicted outer membrane lipoprotein	predicted outer membrane lipoprotein	ECB_02887	snp_nonsynonymous	nonsynonymous	11330
3453	LTEE	Ara-1	50000	REL11330	A	point-mutator	SNP	3093117	3093117	2202	3093117	T&rarr;G	<font class=snp_type_nonsynonymous>K734N</font>&nbsp;(AA<font class=mutation_in_codon>A</font>&rarr;AA<font class=mutation_in_codon>C</font>)&nbsp;	ygiQ	ygiQ	<i>ygiQ</i>&nbsp;&larr;	hypothetical protein	hypothetical protein	ECB_02888	snp_nonsynonymous	nonsynonymous	11330
3454	LTEE	Ara-1	50000	REL11330	A	point-mutator	SNP	3095365	3095365	intergenic (-47/+64)	3095365	A&rarr;C	intergenic&nbsp;(&#8209;47/+64)	ygiQ,sufI	ygiQ/sufI	<i>ygiQ</i>&nbsp;&larr;&nbsp;/&nbsp;&larr;&nbsp;<i>sufI</i>	hypothetical protein/repressor protein for FtsI	hypothetical protein/repressor protein for FtsI	ECB_02888/ECB_02889	snp_intergenic	intergenic	11330
3455	LTEE	Ara-1	50000	REL11330	A	point-mutator	SNP	3096581	3096581	261	3096581	A&rarr;C	<font class=snp_type_synonymous>V87V</font>&nbsp;(GT<font class=mutation_in_codon>T</font>&rarr;GT<font class=mutation_in_codon>G</font>)&nbsp;	sufI	sufI	<i>sufI</i>&nbsp;&larr;	repressor protein for FtsI	repressor protein for FtsI	ECB_02889	snp_synonymous	synonymous	11330
3456	LTEE	Ara-1	50000	REL11330	A	point-mutator	SNP	3097048	3097048	606	3097048	C&rarr;A	<font class=snp_type_synonymous>P202P</font>&nbsp;(CC<font class=mutation_in_codon>G</font>&rarr;CC<font class=mutation_in_codon>T</font>)&nbsp;	plsC	plsC	<i>plsC</i>&nbsp;&larr;	1-acyl-sn-glycerol-3-phosphate acyltransferase	1&#8209;acyl&#8209;sn&#8209;glycerol&#8209;3&#8209;phosphate acyltransferase	ECB_02890	snp_synonymous	synonymous	11330
3457	LTEE	Ara-1	50000	REL11330	A	point-mutator	SNP	3102905	3102905	intergenic (-189/+16)	3102905	A&rarr;C	intergenic&nbsp;(&#8209;189/+16)	ygiU,ygiV	ygiU/ygiV	<i>ygiU</i>&nbsp;&larr;&nbsp;/&nbsp;&larr;&nbsp;<i>ygiV</i>	predicted cyanide hydratase/predicted transcriptional regulator	predicted cyanide hydratase/predicted transcriptional regulator	ECB_02894/ECB_02895	snp_intergenic	intergenic	11330
3458	LTEE	Ara-1	50000	REL11330	A	point-mutator	SNP	3104028	3104028	29	3104028	T&rarr;G	<font class=snp_type_nonsynonymous>M10R</font>&nbsp;(A<font class=mutation_in_codon>T</font>G&rarr;A<font class=mutation_in_codon>G</font>G)&nbsp;	ygiX	ygiX	<i>ygiX</i>&nbsp;&rarr;	DNA-binding response regulator in two-component regulatory system with QseC	DNA&#8209;binding response regulator in two&#8209;component regulatory system with QseC	ECB_02897	snp_nonsynonymous	nonsynonymous	11330
3459	LTEE	Ara-1	50000	REL11330	A	point-mutator	SNP	3106762	3106762	61	3106762	A&rarr;C	<font class=snp_type_nonsynonymous>N21H</font>&nbsp;(<font class=mutation_in_codon>A</font>AC&rarr;<font class=mutation_in_codon>C</font>AC)&nbsp;	mdaB	mdaB	<i>mdaB</i>&nbsp;&rarr;	NADPH quinone reductase	NADPH quinone reductase	ECB_02900	snp_nonsynonymous	nonsynonymous	11330
3460	LTEE	Ara-1	50000	REL11330	A	point-mutator	SNP	3107112	3107112	411	3107112	A&rarr;C	<font class=snp_type_nonsynonymous>Q137H</font>&nbsp;(CA<font class=mutation_in_codon>A</font>&rarr;CA<font class=mutation_in_codon>C</font>)&nbsp;	mdaB	mdaB	<i>mdaB</i>&nbsp;&rarr;	NADPH quinone reductase	NADPH quinone reductase	ECB_02900	snp_nonsynonymous	nonsynonymous	11330
3461	LTEE	Ara-1	50000	REL11330	A	point-mutator	SNP	3109306	3109306	263	3109306	T&rarr;G	<font class=snp_type_nonsynonymous>E88A</font>&nbsp;(G<font class=mutation_in_codon>A</font>A&rarr;G<font class=mutation_in_codon>C</font>A)&nbsp;	parE	parE	<i>parE</i>&nbsp;&larr;	DNA topoisomerase IV subunit B	DNA topoisomerase IV subunit B	ECB_02902	snp_nonsynonymous	nonsynonymous	11330
3462	LTEE	Ara-1	50000	REL11330	A	point-mutator	SNP	3116928	3116928	207	3116928	A&rarr;C	<font class=snp_type_synonymous>G69G</font>&nbsp;(GG<font class=mutation_in_codon>A</font>&rarr;GG<font class=mutation_in_codon>C</font>)&nbsp;	ygiE	ygiE	<i>ygiE</i>&nbsp;&rarr;	zinc transporter ZupT	zinc transporter ZupT	ECB_02912	snp_synonymous	synonymous	11330
3463	LTEE	Ara-1	50000	REL11330	A	point-mutator	SNP	3123205	3123205	489	3123205	T&rarr;G	<font class=snp_type_nonsynonymous>N163K</font>&nbsp;(AA<font class=mutation_in_codon>T</font>&rarr;AA<font class=mutation_in_codon>G</font>)&nbsp;	yqiH	yqiH	<i>yqiH</i>&nbsp;&rarr;	predicted periplasmic pilin chaperone	predicted periplasmic pilin chaperone	ECB_02917	snp_nonsynonymous	nonsynonymous	11330
3464	LTEE	Ara-1	50000	REL11330	A	point-mutator	SNP	3133535	3133535	265	3133535	T&rarr;G	<font class=snp_type_nonsynonymous>S89R</font>&nbsp;(<font class=mutation_in_codon>A</font>GC&rarr;<font class=mutation_in_codon>C</font>GC)&nbsp;	ygiF	ygiF	<i>ygiF</i>&nbsp;&larr;	predicted adenylate cyclase	predicted adenylate cyclase	ECB_02924	snp_nonsynonymous	nonsynonymous	11330
3465	LTEE	Ara-1	50000	REL11330	A	point-mutator	SNP	3137576	3137576	66	3137576	T&rarr;G	<font class=snp_type_nonsynonymous>I22M</font>&nbsp;(AT<font class=mutation_in_codon>T</font>&rarr;AT<font class=mutation_in_codon>G</font>)&nbsp;	ygiH	ygiH	<i>ygiH</i>&nbsp;&rarr;	hypothetical protein	hypothetical protein	ECB_02929	snp_nonsynonymous	nonsynonymous	11330
3466	LTEE	Ara-1	50000	REL11330	A	point-mutator	SNP	3142477	3142477	884	3142477	G&rarr;T	<font class=snp_type_nonsynonymous>P295Q</font>&nbsp;(C<font class=mutation_in_codon>C</font>G&rarr;C<font class=mutation_in_codon>A</font>G)&nbsp;	ygjD	ygjD	<i>ygjD</i>&nbsp;&larr;	O-sialoglycoprotein endopeptidase	O&#8209;sialoglycoprotein endopeptidase	ECB_02934	snp_nonsynonymous	nonsynonymous	11330
3467	LTEE	Ara-1	50000	REL11330	A	point-mutator	SNP	3145485	3145485	1562	3145485	T&rarr;G	<font class=snp_type_nonsynonymous>M521R</font>&nbsp;(A<font class=mutation_in_codon>T</font>G&rarr;A<font class=mutation_in_codon>G</font>G)&nbsp;	dnaG	dnaG	<i>dnaG</i>&nbsp;&rarr;	DNA primase	DNA primase	ECB_02936	snp_nonsynonymous	nonsynonymous	11330
3468	LTEE	Ara-1	50000	REL11330	A	point-mutator	SNP	3152780	3152780	497	3152780	C&rarr;A	<font class=snp_type_nonsynonymous>A166E</font>&nbsp;(G<font class=mutation_in_codon>C</font>G&rarr;G<font class=mutation_in_codon>A</font>G)&nbsp;	ygjG	ygjG	<i>ygjG</i>&nbsp;&rarr;	putrescine:2-oxoglutaric acid aminotransferase, PLP-dependent	putrescine:2&#8209;oxoglutaric acid aminotransferase, PLP&#8209;dependent	ECB_02942	snp_nonsynonymous	nonsynonymous	11330
3469	LTEE	Ara-1	50000	REL11330	A	point-mutator	SNP	3155168	3155168	886	3155168	G&rarr;A	<font class=snp_type_nonsynonymous>G296S</font>&nbsp;(<font class=mutation_in_codon>G</font>GC&rarr;<font class=mutation_in_codon>A</font>GC)&nbsp;	ebgR	ebgR	<i>ebgR</i>&nbsp;&rarr;	DNA-binding transcriptional repressor	DNA&#8209;binding transcriptional repressor	ECB_02944	snp_nonsynonymous	nonsynonymous	11330
3470	LTEE	Ara-1	50000	REL11330	A	point-mutator	SNP	3162213	3162213	509	3162213	A&rarr;C	<font class=snp_type_nonsynonymous>E170A</font>&nbsp;(G<font class=mutation_in_codon>A</font>A&rarr;G<font class=mutation_in_codon>C</font>A)&nbsp;	ygjK	ygjK	<i>ygjK</i>&nbsp;&rarr;	predicted glycosyl hydrolase	predicted glycosyl hydrolase	ECB_02949	snp_nonsynonymous	nonsynonymous	11330
3471	LTEE	Ara-1	50000	REL11330	A	point-mutator	SNP	3166776	3166776	186	3166776	T&rarr;G	<font class=snp_type_nonsynonymous>E62D</font>&nbsp;(GA<font class=mutation_in_codon>A</font>&rarr;GA<font class=mutation_in_codon>C</font>)&nbsp;	ygjM	ygjM	<i>ygjM</i>&nbsp;&larr;	predicted DNA-binding transcriptional regulator	predicted DNA&#8209;binding transcriptional regulator	ECB_02951	snp_nonsynonymous	nonsynonymous	11330
3472	LTEE	Ara-1	50000	REL11330	A	point-mutator	SNP	3173476	3173476	499	3173476	A&rarr;C	<font class=snp_type_nonsynonymous>N167H</font>&nbsp;(<font class=mutation_in_codon>A</font>AC&rarr;<font class=mutation_in_codon>C</font>AC)&nbsp;	ygjU	ygjU	<i>ygjU</i>&nbsp;&rarr;	sodium:serine/threonine symporter	sodium:serine/threonine symporter	ECB_02958	snp_nonsynonymous	nonsynonymous	11330
3473	LTEE	Ara-1	50000	REL11330	A	point-mutator	SNP	3173835	3173835	858	3173835	T&rarr;G	<font class=snp_type_nonsynonymous>D286E</font>&nbsp;(GA<font class=mutation_in_codon>T</font>&rarr;GA<font class=mutation_in_codon>G</font>)&nbsp;	ygjU	ygjU	<i>ygjU</i>&nbsp;&rarr;	sodium:serine/threonine symporter	sodium:serine/threonine symporter	ECB_02958	snp_nonsynonymous	nonsynonymous	11330
3474	LTEE	Ara-1	50000	REL11330	A	point-mutator	SNP	3178270	3178270	133	3178270	A&rarr;C	<font class=snp_type_nonsynonymous>K45Q</font>&nbsp;(<font class=mutation_in_codon>A</font>AA&rarr;<font class=mutation_in_codon>C</font>AA)&nbsp;	exuT	exuT	<i>exuT</i>&nbsp;&rarr;	hexuronate transporter	hexuronate transporter	ECB_02962	snp_nonsynonymous	nonsynonymous	11330
3475	LTEE	Ara-1	50000	REL11330	A	point-mutator	SNP	3179466	3179466	1329	3179466	A&rarr;C	<font class=snp_type_nonsynonymous>L443F</font>&nbsp;(TT<font class=mutation_in_codon>A</font>&rarr;TT<font class=mutation_in_codon>C</font>)&nbsp;	exuT	exuT	<i>exuT</i>&nbsp;&rarr;	hexuronate transporter	hexuronate transporter	ECB_02962	snp_nonsynonymous	nonsynonymous	11330
3476	LTEE	Ara-1	50000	REL11330	A	point-mutator	SNP	3184511	3184511	454	3184511	A&rarr;C	<font class=snp_type_nonsynonymous>I152L</font>&nbsp;(<font class=mutation_in_codon>A</font>TC&rarr;<font class=mutation_in_codon>C</font>TC)&nbsp;	yqjG	yqjG	<i>yqjG</i>&nbsp;&rarr;	predicted S-transferase	predicted S&#8209;transferase	ECB_02971	snp_nonsynonymous	nonsynonymous	11330
3477	LTEE	Ara-1	50000	REL11330	A	point-mutator	SNP	3188952	3188952	733	3188952	A&rarr;C	<font class=snp_type_nonsynonymous>S245A</font>&nbsp;(<font class=mutation_in_codon>T</font>CT&rarr;<font class=mutation_in_codon>G</font>CT)&nbsp;	yhaM	yhaM	<i>yhaM</i>&nbsp;&larr;	hypothetical protein	hypothetical protein	ECB_02977	snp_nonsynonymous	nonsynonymous	11330
3478	LTEE	Ara-1	50000	REL11330	A	point-mutator	SNP	3189084	3189084	601	3189084	T&rarr;G	<font class=snp_type_nonsynonymous>I201L</font>&nbsp;(<font class=mutation_in_codon>A</font>TC&rarr;<font class=mutation_in_codon>C</font>TC)&nbsp;	yhaM	yhaM	<i>yhaM</i>&nbsp;&larr;	hypothetical protein	hypothetical protein	ECB_02977	snp_nonsynonymous	nonsynonymous	11330
3479	LTEE	Ara-1	50000	REL11330	A	point-mutator	SNP	3189699	3189699	intergenic (-15/+13)	3189699	A&rarr;C	intergenic&nbsp;(&#8209;15/+13)	yhaM,yhaO	yhaM/yhaO	<i>yhaM</i>&nbsp;&larr;&nbsp;/&nbsp;&larr;&nbsp;<i>yhaO</i>	hypothetical protein/predicted transporter	hypothetical protein/predicted transporter	ECB_02977/ECB_02978	snp_intergenic	intergenic	11330
3480	LTEE	Ara-1	50000	REL11330	A	point-mutator	SNP	3190478	3190478	503	3190478	A&rarr;C	<font class=snp_type_nonsynonymous>L168R</font>&nbsp;(C<font class=mutation_in_codon>T</font>G&rarr;C<font class=mutation_in_codon>G</font>G)&nbsp;	yhaO	yhaO	<i>yhaO</i>&nbsp;&larr;	predicted transporter	predicted transporter	ECB_02978	snp_nonsynonymous	nonsynonymous	11330
3481	LTEE	Ara-1	50000	REL11330	A	point-mutator	SNP	3191418	3191418	1266	3191418	A&rarr;C	<font class=snp_type_nonsynonymous>D422E</font>&nbsp;(GA<font class=mutation_in_codon>T</font>&rarr;GA<font class=mutation_in_codon>G</font>)&nbsp;	tdcG	tdcG	<i>tdcG</i>&nbsp;&larr;	L-serine dehydratase 3	L&#8209;serine dehydratase 3	ECB_02979	snp_nonsynonymous	nonsynonymous	11330
3482	LTEE	Ara-1	50000	REL11330	A	point-mutator	SNP	3192262	3192262	422	3192262	T&rarr;G	<font class=snp_type_nonsynonymous>K141T</font>&nbsp;(A<font class=mutation_in_codon>A</font>A&rarr;A<font class=mutation_in_codon>C</font>A)&nbsp;	tdcG	tdcG	<i>tdcG</i>&nbsp;&larr;	L-serine dehydratase 3	L&#8209;serine dehydratase 3	ECB_02979	snp_nonsynonymous	nonsynonymous	11330
3483	LTEE	Ara-1	50000	REL11330	A	point-mutator	SNP	3192570	3192570	114	3192570	T&rarr;G	<font class=snp_type_nonsynonymous>L38F</font>&nbsp;(TT<font class=mutation_in_codon>A</font>&rarr;TT<font class=mutation_in_codon>C</font>)&nbsp;	tdcG	tdcG	<i>tdcG</i>&nbsp;&larr;	L-serine dehydratase 3	L&#8209;serine dehydratase 3	ECB_02979	snp_nonsynonymous	nonsynonymous	11330
3484	LTEE	Ara-1	50000	REL11330	A	point-mutator	SNP	3193394	3193394	2059	3193394	T&rarr;G	<font class=snp_type_nonsynonymous>K687Q</font>&nbsp;(<font class=mutation_in_codon>A</font>AA&rarr;<font class=mutation_in_codon>C</font>AA)&nbsp;	tdcE	tdcE	<i>tdcE</i>&nbsp;&larr;	pyruvate formate-lyase 4/2-ketobutyrate formate-lyase	pyruvate formate&#8209;lyase 4/2&#8209;ketobutyrate formate&#8209;lyase	ECB_02981	snp_nonsynonymous	nonsynonymous	11330
3485	LTEE	Ara-1	50000	REL11330	A	point-mutator	SNP	3194252	3194252	1201	3194252	A&rarr;C	<font class=snp_type_nonsynonymous>S401A</font>&nbsp;(<font class=mutation_in_codon>T</font>CC&rarr;<font class=mutation_in_codon>G</font>CC)&nbsp;	tdcE	tdcE	<i>tdcE</i>&nbsp;&larr;	pyruvate formate-lyase 4/2-ketobutyrate formate-lyase	pyruvate formate&#8209;lyase 4/2&#8209;ketobutyrate formate&#8209;lyase	ECB_02981	snp_nonsynonymous	nonsynonymous	11330
3486	LTEE	Ara-1	50000	REL11330	A	point-mutator	SNP	3200806	3200806	intergenic (+174/-82)	3200806	A&rarr;C	intergenic&nbsp;(+174/&#8209;82)	tdcR,yhaB	tdcR/yhaB	<i>tdcR</i>&nbsp;&rarr;&nbsp;/&nbsp;&rarr;&nbsp;<i>yhaB</i>	DNA-binding transcriptional activator/hypothetical protein	DNA&#8209;binding transcriptional activator/hypothetical protein	ECB_02986/ECB_02987	snp_intergenic	intergenic	11330
3487	LTEE	Ara-1	50000	REL11330	A	point-mutator	SNP	3208531	3208531	321	3208531	A&rarr;C	<font class=snp_type_nonsynonymous>K107N</font>&nbsp;(AA<font class=mutation_in_codon>A</font>&rarr;AA<font class=mutation_in_codon>C</font>)&nbsp;	garD	garD	<i>garD</i>&nbsp;&rarr;	(D)-galactarate dehydrogenase	(D)&#8209;galactarate dehydrogenase	ECB_02993	snp_nonsynonymous	nonsynonymous	11330
3488	LTEE	Ara-1	50000	REL11330	A	point-mutator	SNP	3216915	3216915	intergenic (+57/-294)	3216915	G&rarr;T	intergenic&nbsp;(+57/&#8209;294)	agaA,agaS	agaA/agaS	<i>agaA</i>&nbsp;&rarr;&nbsp;/&nbsp;&rarr;&nbsp;<i>agaS</i>	N-acetylgalactosamine-6-phosphate deacetylase/tagatose-6-phosphate ketose/aldose isomerase	N&#8209;acetylgalactosamine&#8209;6&#8209;phosphate deacetylase/tagatose&#8209;6&#8209;phosphate ketose/aldose isomerase	ECB_03002/ECB_03003	snp_intergenic	intergenic	11330
3489	LTEE	Ara-1	50000	REL11330	A	point-mutator	SNP	3219202	3219202	827	3219202	A&rarr;C	<font class=snp_type_nonsynonymous>N276T</font>&nbsp;(A<font class=mutation_in_codon>A</font>T&rarr;A<font class=mutation_in_codon>C</font>T)&nbsp;	agaY	agaY	<i>agaY</i>&nbsp;&rarr;	tagatose 6-phosphate aldolase 1, kbaY subunit	tagatose 6&#8209;phosphate aldolase 1, kbaY subunit	ECB_03004	snp_nonsynonymous	nonsynonymous	11330
3490	LTEE	Ara-1	50000	REL11330	A	point-mutator	SNP	3227494	3227494	920	3227494	A&rarr;C	<font class=snp_type_nonsynonymous>E307A</font>&nbsp;(G<font class=mutation_in_codon>A</font>A&rarr;G<font class=mutation_in_codon>C</font>A)&nbsp;	yraK	yraK	<i>yraK</i>&nbsp;&rarr;	predicted fimbrial-like adhesin protein	predicted fimbrial&#8209;like adhesin protein	ECB_03012	snp_nonsynonymous	nonsynonymous	11330
3491	LTEE	Ara-1	50000	REL11330	A	point-mutator	SNP	3248957	3248957	2292	3248957	A&rarr;T	<font class=snp_type_nonsynonymous>D764E</font>&nbsp;(GA<font class=mutation_in_codon>T</font>&rarr;GA<font class=mutation_in_codon>A</font>)&nbsp;	infB	infB	<i>infB</i>&nbsp;&larr;	translation initiation factor IF-2	translation initiation factor IF&#8209;2	ECB_03035	snp_nonsynonymous	nonsynonymous	11330
3492	LTEE	Ara-1	50000	REL11330	A	point-mutator	SNP	3262857	3262857	42	3262857	A&rarr;C	<font class=snp_type_synonymous>L14L</font>&nbsp;(CT<font class=mutation_in_codon>T</font>&rarr;CT<font class=mutation_in_codon>G</font>)&nbsp;	rrmJ	rrmJ	<i>rrmJ</i>&nbsp;&larr;	23S rRNA methyltransferase	23S rRNA methyltransferase	ECB_03044	snp_synonymous	synonymous	11330
3493	LTEE	Ara-1	50000	REL11330	A	point-mutator	SNP	3270765	3270765	965	3270765	A&rarr;C	<font class=snp_type_nonsynonymous>F322C</font>&nbsp;(T<font class=mutation_in_codon>T</font>C&rarr;T<font class=mutation_in_codon>G</font>C)&nbsp;	murA	murA	<i>murA</i>&nbsp;&larr;	UDP-N-acetylglucosamine 1-carboxyvinyltransferase	UDP&#8209;N&#8209;acetylglucosamine 1&#8209;carboxyvinyltransferase	ECB_03054	snp_nonsynonymous	nonsynonymous	11330
3494	LTEE	Ara-1	50000	REL11330	A	point-mutator	SNP	3275625	3275625	116	3275625	T&rarr;G	<font class=snp_type_nonsynonymous>I39S</font>&nbsp;(A<font class=mutation_in_codon>T</font>C&rarr;A<font class=mutation_in_codon>G</font>C)&nbsp;	yrbG	yrbG	<i>yrbG</i>&nbsp;&rarr;	predicted calcium/sodium:proton antiporter	predicted calcium/sodium:proton antiporter	ECB_03061	snp_nonsynonymous	nonsynonymous	11330
3495	LTEE	Ara-1	50000	REL11330	A	point-mutator	SNP	3288092	3288092	169	3288092	G&rarr;A	<font class=snp_type_nonsynonymous>R57C</font>&nbsp;(<font class=mutation_in_codon>C</font>GT&rarr;<font class=mutation_in_codon>T</font>GT)&nbsp;	arcB	arcB	<i>arcB</i>&nbsp;&larr;	hybrid sensory histidine kinase in two-component regulatory system with ArcA	hybrid sensory histidine kinase in two&#8209;component regulatory system with ArcA	ECB_03075	snp_nonsynonymous	nonsynonymous	11330
3496	LTEE	Ara-1	50000	REL11330	A	point-mutator	SNP	3288693	3288693	593	3288693	T&rarr;G	<font class=snp_type_nonsynonymous>Q198P</font>&nbsp;(C<font class=mutation_in_codon>A</font>A&rarr;C<font class=mutation_in_codon>C</font>A)&nbsp;	yhcC	yhcC	<i>yhcC</i>&nbsp;&larr;	predicted Fe-S oxidoreductase	predicted Fe&#8209;S oxidoreductase	ECB_03076	snp_nonsynonymous	nonsynonymous	11330
3497	LTEE	Ara-1	50000	REL11330	A	point-mutator	DEL	3289962	3289977	coding (96-111/4554 nt)	3289962	&Delta;16&nbsp;bp	coding&nbsp;(96&#8209;111/4554&nbsp;nt)	gltB	gltB	<i>gltB</i>&nbsp;&rarr;	glutamate synthase, large subunit	glutamate synthase, large subunit	ECB_03077	small_indel	not_snp	11330
3498	LTEE	Ara-1	50000	REL11330	A	point-mutator	SNP	3290769	3290769	903	3290769	A&rarr;C	<font class=snp_type_synonymous>A301A</font>&nbsp;(GC<font class=mutation_in_codon>A</font>&rarr;GC<font class=mutation_in_codon>C</font>)&nbsp;	gltB	gltB	<i>gltB</i>&nbsp;&rarr;	glutamate synthase, large subunit	glutamate synthase, large subunit	ECB_03077	snp_synonymous	synonymous	11330
3499	LTEE	Ara-1	50000	REL11330	A	point-mutator	SNP	3291356	3291356	1490	3291356	A&rarr;C	<font class=snp_type_nonsynonymous>E497A</font>&nbsp;(G<font class=mutation_in_codon>A</font>A&rarr;G<font class=mutation_in_codon>C</font>A)&nbsp;	gltB	gltB	<i>gltB</i>&nbsp;&rarr;	glutamate synthase, large subunit	glutamate synthase, large subunit	ECB_03077	snp_nonsynonymous	nonsynonymous	11330
3500	LTEE	Ara-1	50000	REL11330	A	point-mutator	MOB	3294098	3294106	coding (4232-4240/4554 nt)	3294098	IS<i>1</i>&nbsp;(&#8211;)&nbsp;+9&nbsp;bp	coding&nbsp;(4232&#8209;4240/4554&nbsp;nt)	gltB	gltB	<i>gltB</i>&nbsp;&rarr;	glutamate synthase, large subunit	glutamate synthase, large subunit	ECB_03077	mobile_element_insertion	not_snp	11330
3501	LTEE	Ara-1	50000	REL11330	A	point-mutator	SNP	3297875	3297875	374	3297875	A&rarr;C	<font class=snp_type_nonsynonymous>V125G</font>&nbsp;(G<font class=mutation_in_codon>T</font>C&rarr;G<font class=mutation_in_codon>G</font>C)&nbsp;	nanK	nanK	<i>nanK</i>&nbsp;&larr;	N-acetylmannosamine kinase	N&#8209;acetylmannosamine kinase	ECB_03082	snp_nonsynonymous	nonsynonymous	11330
3502	LTEE	Ara-1	50000	REL11330	A	point-mutator	SNP	3311432	3311432	734	3311432	T&rarr;G	<font class=snp_type_nonsynonymous>E245A</font>&nbsp;(G<font class=mutation_in_codon>A</font>A&rarr;G<font class=mutation_in_codon>C</font>A)&nbsp;	mdh	mdh	<i>mdh</i>&nbsp;&larr;	malate dehydrogenase	malate dehydrogenase	ECB_03096	snp_nonsynonymous	nonsynonymous	11330
3503	LTEE	Ara-1	50000	REL11330	A	point-mutator	SNP	3312435	3312435	intergenic (-270/-165)	3312435	A&rarr;C	intergenic&nbsp;(&#8209;270/&#8209;165)	mdh,argR	mdh/argR	<i>mdh</i>&nbsp;&larr;&nbsp;/&nbsp;&rarr;&nbsp;<i>argR</i>	malate dehydrogenase/arginine repressor	malate dehydrogenase/arginine repressor	ECB_03096/ECB_03097	snp_intergenic	intergenic	11330
3504	LTEE	Ara-1	50000	REL11330	A	point-mutator	SNP	3312654	3312654	55	3312654	A&rarr;C	<font class=snp_type_nonsynonymous>K19Q</font>&nbsp;(<font class=mutation_in_codon>A</font>AA&rarr;<font class=mutation_in_codon>C</font>AA)&nbsp;	argR	argR	<i>argR</i>&nbsp;&rarr;	arginine repressor	arginine repressor	ECB_03097	snp_nonsynonymous	nonsynonymous	11330
3505	LTEE	Ara-1	50000	REL11330	A	point-mutator	SNP	3313358	3313358	intergenic (+288/-77)	3313358	A&rarr;C	intergenic&nbsp;(+288/&#8209;77)	argR,yhcN	argR/yhcN	<i>argR</i>&nbsp;&rarr;&nbsp;/&nbsp;&rarr;&nbsp;<i>yhcN</i>	arginine repressor/hypothetical protein	arginine repressor/hypothetical protein	ECB_03097/ECB_03098	snp_intergenic	intergenic	11330
3506	LTEE	Ara-1	50000	REL11330	A	point-mutator	SNP	3315744	3315744	342	3315744	T&rarr;G	<font class=snp_type_synonymous>R114R</font>&nbsp;(CG<font class=mutation_in_codon>A</font>&rarr;CG<font class=mutation_in_codon>C</font>)&nbsp;	yhcP	yhcP	<i>yhcP</i>&nbsp;&larr;	p-hydroxybenzoic acid efflux system component	p&#8209;hydroxybenzoic acid efflux system component	ECB_03100	snp_synonymous	synonymous	11330
3507	LTEE	Ara-1	50000	REL11330	A	point-mutator	SNP	3315764	3315764	322	3315764	A&rarr;C	<font class=snp_type_nonsynonymous>W108G</font>&nbsp;(<font class=mutation_in_codon>T</font>GG&rarr;<font class=mutation_in_codon>G</font>GG)&nbsp;	yhcP	yhcP	<i>yhcP</i>&nbsp;&larr;	p-hydroxybenzoic acid efflux system component	p&#8209;hydroxybenzoic acid efflux system component	ECB_03100	snp_nonsynonymous	nonsynonymous	11330
3508	LTEE	Ara-1	50000	REL11330	A	point-mutator	SNP	3323393	3323393	757	3323393	T&rarr;G	<font class=snp_type_nonsynonymous>K253Q</font>&nbsp;(<font class=mutation_in_codon>A</font>AA&rarr;<font class=mutation_in_codon>C</font>AA)&nbsp;	yhdP	yhdP	<i>yhdP</i>&nbsp;&larr;	conserved membrane protein, predicted transporter	conserved membrane protein, predicted transporter	ECB_03105	snp_nonsynonymous	nonsynonymous	11330
3509	LTEE	Ara-1	50000	REL11330	A	point-mutator	SNP	3339158	3339158	intergenic (+22/-4)	3339158	A&rarr;C	intergenic&nbsp;(+22/&#8209;4)	yhdG,fis	yhdG/fis	<i>yhdG</i>&nbsp;&rarr;&nbsp;/&nbsp;&rarr;&nbsp;<i>fis</i>	tRNA-dihydrouridine synthase B/DNA-binding protein Fis	tRNA&#8209;dihydrouridine synthase B/DNA&#8209;binding protein Fis	ECB_03118/ECB_03119	snp_intergenic	intergenic	11330
3510	LTEE	Ara-1	50000	REL11330	A	point-mutator	SNP	3340760	3340760	597	3340760	T&rarr;G	<font class=snp_type_nonsynonymous>R199S</font>&nbsp;(AG<font class=mutation_in_codon>A</font>&rarr;AG<font class=mutation_in_codon>C</font>)&nbsp;	envR	envR	<i>envR</i>&nbsp;&larr;	DNA-binding transcriptional regulator	DNA&#8209;binding transcriptional regulator	ECB_03122	snp_nonsynonymous	nonsynonymous	11330
3511	LTEE	Ara-1	50000	REL11330	A	point-mutator	SNP	3342683	3342683	929	3342683	A&rarr;C	<font class=snp_type_nonsynonymous>Q310P</font>&nbsp;(C<font class=mutation_in_codon>A</font>A&rarr;C<font class=mutation_in_codon>C</font>A)&nbsp;	acrE	acrE	<i>acrE</i>&nbsp;&rarr;	cytoplasmic membrane lipoprotein	cytoplasmic membrane lipoprotein	ECB_03123	snp_nonsynonymous	nonsynonymous	11330
3512	LTEE	Ara-1	50000	REL11330	A	point-mutator	SNP	3343513	3343513	590	3343513	A&rarr;C	<font class=snp_type_nonsynonymous>K197T</font>&nbsp;(A<font class=mutation_in_codon>A</font>A&rarr;A<font class=mutation_in_codon>C</font>A)&nbsp;	acrF	acrF	<i>acrF</i>&nbsp;&rarr;	multidrug efflux system protein	multidrug efflux system protein	ECB_03124	snp_nonsynonymous	nonsynonymous	11330
3513	LTEE	Ara-1	50000	REL11330	A	point-mutator	SNP	3346588	3346588	intergenic (+86/-453)	3346588	T&rarr;G	intergenic&nbsp;(+86/&#8209;453)	yhdV,yhdW	yhdV/yhdW	<i>yhdV</i>&nbsp;&rarr;&nbsp;/&nbsp;&rarr;&nbsp;<i>yhdW</i>	predicted outer membrane protein/predicted amino-acid transporter subunit	predicted outer membrane protein/predicted amino&#8209;acid transporter subunit	ECB_03125/ECB_03126	snp_intergenic	intergenic	11330
3514	LTEE	Ara-1	50000	REL11330	A	point-mutator	SNP	3365940	3365940	12	3365940	T&rarr;G	<font class=snp_type_nonsynonymous>I4M</font>&nbsp;(AT<font class=mutation_in_codon>T</font>&rarr;AT<font class=mutation_in_codon>G</font>)&nbsp;	mscL	mscL	<i>mscL</i>&nbsp;&rarr;	large-conductance mechanosensitive channel	large&#8209;conductance mechanosensitive channel	ECB_03141	snp_nonsynonymous	nonsynonymous	11330
3515	LTEE	Ara-1	50000	REL11330	A	point-mutator	SNP	3368272	3368272	663	3368272	T&rarr;G	<font class=snp_type_synonymous>A221A</font>&nbsp;(GC<font class=mutation_in_codon>A</font>&rarr;GC<font class=mutation_in_codon>C</font>)&nbsp;	rpoA	rpoA	<i>rpoA</i>&nbsp;&larr;	DNA-directed RNA polymerase subunit alpha	DNA&#8209;directed RNA polymerase subunit alpha	ECB_03146	snp_synonymous	synonymous	11330
3516	LTEE	Ara-1	50000	REL11330	A	point-mutator	SNP	3369432	3369432	149	3369432	T&rarr;C	<font class=snp_type_nonsynonymous>D50G</font>&nbsp;(G<font class=mutation_in_codon>A</font>C&rarr;G<font class=mutation_in_codon>G</font>C)&nbsp;	rpsD	rpsD	<i>rpsD</i>&nbsp;&larr;	30S ribosomal protein S4	30S ribosomal protein S4	ECB_03147	snp_nonsynonymous	nonsynonymous	11330
3517	LTEE	Ara-1	50000	REL11330	A	point-mutator	SNP	3370027	3370027	350	3370027	T&rarr;A	<font class=snp_type_nonsynonymous>K117M</font>&nbsp;(A<font class=mutation_in_codon>A</font>G&rarr;A<font class=mutation_in_codon>T</font>G)&nbsp;	rpsM	rpsM	<i>rpsM</i>&nbsp;&larr;	30S ribosomal protein S13	30S ribosomal protein S13	ECB_03149	snp_nonsynonymous	nonsynonymous	11330
3518	LTEE	Ara-1	50000	REL11330	A	point-mutator	SNP	3373799	3373799	247	3373799	A&rarr;C	<font class=snp_type_nonsynonymous>F83V</font>&nbsp;(<font class=mutation_in_codon>T</font>TC&rarr;<font class=mutation_in_codon>G</font>TC)&nbsp;	rplF	rplF	<i>rplF</i>&nbsp;&larr;	50S ribosomal protein L6	50S ribosomal protein L6	ECB_03156	snp_nonsynonymous	nonsynonymous	11330
3519	LTEE	Ara-1	50000	REL11330	A	point-mutator	SNP	3375800	3375800	255	3375800	A&rarr;C	<font class=snp_type_synonymous>V85V</font>&nbsp;(GT<font class=mutation_in_codon>T</font>&rarr;GT<font class=mutation_in_codon>G</font>)&nbsp;	rplN	rplN	<i>rplN</i>&nbsp;&larr;	50S ribosomal protein L14	50S ribosomal protein L14	ECB_03161	snp_synonymous	synonymous	11330
3520	LTEE	Ara-1	50000	REL11330	A	point-mutator	SNP	3378700	3378700	570	3378700	T&rarr;G	<font class=snp_type_synonymous>A190A</font>&nbsp;(GC<font class=mutation_in_codon>A</font>&rarr;GC<font class=mutation_in_codon>C</font>)&nbsp;	rplB	rplB	<i>rplB</i>&nbsp;&larr;	50S ribosomal protein L2	50S ribosomal protein L2	ECB_03168	snp_synonymous	synonymous	11330
3521	LTEE	Ara-1	50000	REL11330	A	point-mutator	SNP	3382408	3382408	896	3382408	A&rarr;C	<font class=snp_type_nonsense>L299*</font>&nbsp;(T<font class=mutation_in_codon>T</font>A&rarr;T<font class=mutation_in_codon>G</font>A)&nbsp;	gspA	gspA	<i>gspA</i>&nbsp;&larr;	general secretory pathway component, cryptic	general secretory pathway component, cryptic	ECB_03174	snp_nonsense	nonsense	11330
3522	LTEE	Ara-1	50000	REL11330	A	point-mutator	SNP	3384665	3384665	384	3384665	A&rarr;C	<font class=snp_type_synonymous>R128R</font>&nbsp;(CG<font class=mutation_in_codon>A</font>&rarr;CG<font class=mutation_in_codon>C</font>)&nbsp;	gspD	gspD	<i>gspD</i>&nbsp;&rarr;	general secretory pathway component, cryptic	general secretory pathway component, cryptic	ECB_03176	snp_synonymous	synonymous	11330
3523	LTEE	Ara-1	50000	REL11330	A	point-mutator	SNP	3403804	3403804	542	3403804	T&rarr;G	<font class=snp_type_nonsynonymous>D181A</font>&nbsp;(G<font class=mutation_in_codon>A</font>T&rarr;G<font class=mutation_in_codon>C</font>T)&nbsp;	yheO	yheO	<i>yheO</i>&nbsp;&larr;	predicted DNA-binding transcriptional regulator	predicted DNA&#8209;binding transcriptional regulator	ECB_03197	snp_nonsynonymous	nonsynonymous	11330
3524	LTEE	Ara-1	50000	REL11330	A	point-mutator	SNP	3410000	3410000	807	3410000	A&rarr;C	<font class=snp_type_nonsynonymous>K269N</font>&nbsp;(AA<font class=mutation_in_codon>A</font>&rarr;AA<font class=mutation_in_codon>C</font>)&nbsp;	yheS	yheS	<i>yheS</i>&nbsp;&rarr;	fused predicted transporter subunits of ABC superfamily: ATP-binding components	fused predicted transporter subunits of ABC superfamily: ATP&#8209;binding components	ECB_03203	snp_nonsynonymous	nonsynonymous	11330
3525	LTEE	Ara-1	50000	REL11330	A	point-mutator	SNP	3413924	3413924	intergenic (-201/-101)	3413924	T&rarr;G	intergenic&nbsp;(&#8209;201/&#8209;101)	yhfA,crp	yhfA/crp	<i>yhfA</i>&nbsp;&larr;&nbsp;/&nbsp;&rarr;&nbsp;<i>crp</i>	hypothetical protein/DNA-binding transcriptional dual regulator	hypothetical protein/DNA&#8209;binding transcriptional dual regulator	ECB_03207/ECB_03208	snp_intergenic	intergenic	11330
3526	LTEE	Ara-1	50000	REL11330	A	point-mutator	SNP	3425371	3425371	464	3425371	T&rarr;G	<font class=snp_type_nonsynonymous>F155C</font>&nbsp;(T<font class=mutation_in_codon>T</font>C&rarr;T<font class=mutation_in_codon>G</font>C)&nbsp;	nirC	nirC	<i>nirC</i>&nbsp;&rarr;	nitrite transporter	nitrite transporter	ECB_03218	snp_nonsynonymous	nonsynonymous	11330
3527	LTEE	Ara-1	50000	REL11330	A	point-mutator	SNP	3428587	3428587	773	3428587	A&rarr;C	<font class=snp_type_nonsynonymous>K258T</font>&nbsp;(A<font class=mutation_in_codon>A</font>A&rarr;A<font class=mutation_in_codon>C</font>A)&nbsp;	yhfM	yhfM	<i>yhfM</i>&nbsp;&rarr;	predicted fructoselysine transporter	predicted fructoselysine transporter	ECB_03221	snp_nonsynonymous	nonsynonymous	11330
3528	LTEE	Ara-1	50000	REL11330	A	point-mutator	SNP	3429293	3429293	121	3429293	A&rarr;C	<font class=snp_type_nonsynonymous>K41Q</font>&nbsp;(<font class=mutation_in_codon>A</font>AG&rarr;<font class=mutation_in_codon>C</font>AG)&nbsp;	yhfN	yhfN	<i>yhfN</i>&nbsp;&rarr;	fructoselysine-6-P-deglycase	fructoselysine&#8209;6&#8209;P&#8209;deglycase	ECB_03222	snp_nonsynonymous	nonsynonymous	11330
3529	LTEE	Ara-1	50000	REL11330	A	point-mutator	SNP	3434189	3434189	intergenic (-15/+19)	3434189	A&rarr;C	intergenic&nbsp;(&#8209;15/+19)	insA-23,yhfS	insA-23/yhfS	<i>insA&#8209;23</i>&nbsp;&larr;&nbsp;/&nbsp;&larr;&nbsp;<i>yhfS</i>	IS1 protein InsA/putative enzyme; b3376_2	IS1 protein InsA/putative enzyme; b3376_2	ECB_03228/ECB_03226	snp_intergenic	intergenic	11330
3530	LTEE	Ara-1	50000	REL11330	A	point-mutator	SNP	3442252	3442252	69	3442252	A&rarr;C	<font class=snp_type_synonymous>G23G</font>&nbsp;(GG<font class=mutation_in_codon>T</font>&rarr;GG<font class=mutation_in_codon>G</font>)&nbsp;	trpS	trpS	<i>trpS</i>&nbsp;&larr;	tryptophanyl-tRNA synthetase	tryptophanyl&#8209;tRNA synthetase	ECB_03236	snp_synonymous	synonymous	11330
3531	LTEE	Ara-1	50000	REL11330	A	point-mutator	SNP	3457040	3457040	1888	3457040	A&rarr;C	<font class=snp_type_nonsynonymous>K630Q</font>&nbsp;(<font class=mutation_in_codon>A</font>AA&rarr;<font class=mutation_in_codon>C</font>AA)&nbsp;	yrfF	yrfF	<i>yrfF</i>&nbsp;&rarr;	predicted inner membrane protein	predicted inner membrane protein	ECB_03250	snp_nonsynonymous	nonsynonymous	11330
3532	LTEE	Ara-1	50000	REL11330	A	point-mutator	SNP	3462285	3462285	784	3462285	A&rarr;C	<font class=snp_type_nonsynonymous>K262Q</font>&nbsp;(<font class=mutation_in_codon>A</font>AA&rarr;<font class=mutation_in_codon>C</font>AA)&nbsp;	pckA	pckA	<i>pckA</i>&nbsp;&rarr;	phosphoenolpyruvate carboxykinase	phosphoenolpyruvate carboxykinase	ECB_03255	snp_nonsynonymous	nonsynonymous	11330
3533	LTEE	Ara-1	50000	REL11330	A	point-mutator	SNP	3466075	3466075	4	3466075	A&rarr;C	<font class=snp_type_nonsynonymous>N2H</font>&nbsp;(<font class=mutation_in_codon>A</font>AT&rarr;<font class=mutation_in_codon>C</font>AT)&nbsp;	yhgF	yhgF	<i>yhgF</i>&nbsp;&rarr;	predicted transcriptional accessory protein	predicted transcriptional accessory protein	ECB_03259	snp_nonsynonymous	nonsynonymous	11330
3534	LTEE	Ara-1	50000	REL11330	A	point-mutator	SNP	3471921	3471921	90	3471921	T&rarr;G	<font class=snp_type_nonsynonymous>F30L</font>&nbsp;(TT<font class=mutation_in_codon>T</font>&rarr;TT<font class=mutation_in_codon>G</font>)&nbsp;	yhgA	yhgA	<i>yhgA</i>&nbsp;&rarr;	predicted transposase	predicted transposase	ECB_03263	snp_nonsynonymous	nonsynonymous	11330
3535	LTEE	Ara-1	50000	REL11330	A	point-mutator	SNP	3475086	3475086	intergenic (+222/-139)	3475086	T&rarr;G	intergenic&nbsp;(+222/&#8209;139)	yhgI,gntT	yhgI/gntT	<i>yhgI</i>&nbsp;&rarr;&nbsp;/&nbsp;&rarr;&nbsp;<i>gntT</i>	predicted gluconate transport associated protein/gluconate transporter, high-affinity GNT I system	predicted gluconate transport associated protein/gluconate transporter, high&#8209;affinity GNT I system	ECB_03266/ECB_03267	snp_intergenic	intergenic	11330
3536	LTEE	Ara-1	50000	REL11330	A	point-mutator	SNP	3478384	3478384	287	3478384	T&rarr;G	<font class=snp_type_nonsynonymous>K96T</font>&nbsp;(A<font class=mutation_in_codon>A</font>A&rarr;A<font class=mutation_in_codon>C</font>A)&nbsp;	malQ	malQ	<i>malQ</i>&nbsp;&larr;	4-alpha-glucanotransferase (amylomaltase)	4&#8209;alpha&#8209;glucanotransferase (amylomaltase)	ECB_03268	snp_nonsynonymous	nonsynonymous	11330
3537	LTEE	Ara-1	50000	REL11330	A	point-mutator	SNP	3479626	3479626	1448	3479626	T&rarr;G	<font class=snp_type_nonsynonymous>Q483P</font>&nbsp;(C<font class=mutation_in_codon>A</font>G&rarr;C<font class=mutation_in_codon>C</font>G)&nbsp;	malP	malP	<i>malP</i>&nbsp;&larr;	maltodextrin phosphorylase	maltodextrin phosphorylase	ECB_03269	snp_nonsynonymous	nonsynonymous	11330
3538	LTEE	Ara-1	50000	REL11330	A	point-mutator	SNP	3482156	3482156	472	3482156	T&rarr;G	<font class=snp_type_nonsynonymous>L158V</font>&nbsp;(<font class=mutation_in_codon>T</font>TG&rarr;<font class=mutation_in_codon>G</font>TG)&nbsp;	malT	malT	<i>malT</i>&nbsp;&rarr;	transcriptional regulator MalT	transcriptional regulator MalT	ECB_03270	snp_nonsynonymous	nonsynonymous	11330
3539	LTEE	Ara-1	50000	REL11330	A	point-mutator	SNP	3483047	3483047	1363	3483047	C&rarr;A	<font class=snp_type_nonsynonymous>R455S</font>&nbsp;(<font class=mutation_in_codon>C</font>GC&rarr;<font class=mutation_in_codon>A</font>GC)&nbsp;	malT	malT	<i>malT</i>&nbsp;&rarr;	transcriptional regulator MalT	transcriptional regulator MalT	ECB_03270	snp_nonsynonymous	nonsynonymous	11330
3540	LTEE	Ara-1	50000	REL11330	A	point-mutator	SNP	3483277	3483277	1593	3483277	A&rarr;C	<font class=snp_type_nonsynonymous>L531F</font>&nbsp;(TT<font class=mutation_in_codon>A</font>&rarr;TT<font class=mutation_in_codon>C</font>)&nbsp;	malT	malT	<i>malT</i>&nbsp;&rarr;	transcriptional regulator MalT	transcriptional regulator MalT	ECB_03270	snp_nonsynonymous	nonsynonymous	11330
3541	LTEE	Ara-1	50000	REL11330	A	point-mutator	SNP	3485307	3485307	143	3485307	A&rarr;C	<font class=snp_type_nonsynonymous>L48R</font>&nbsp;(C<font class=mutation_in_codon>T</font>G&rarr;C<font class=mutation_in_codon>G</font>G)&nbsp;	rtcA	rtcA	<i>rtcA</i>&nbsp;&larr;	RNA 3'-terminal-phosphate cyclase	RNA 3'&#8209;terminal&#8209;phosphate cyclase	ECB_03271	snp_nonsynonymous	nonsynonymous	11330
3542	LTEE	Ara-1	50000	REL11330	A	point-mutator	SNP	3487874	3487874	1007	3487874	A&rarr;C	<font class=snp_type_nonsynonymous>Q336P</font>&nbsp;(C<font class=mutation_in_codon>A</font>G&rarr;C<font class=mutation_in_codon>C</font>G)&nbsp;	rtcR	rtcR	<i>rtcR</i>&nbsp;&rarr;	sigma 54-dependent transcriptional regulator of rtcBA expression	sigma 54&#8209;dependent transcriptional regulator of rtcBA expression	ECB_03273	snp_nonsynonymous	nonsynonymous	11330
3543	LTEE	Ara-1	50000	REL11330	A	point-mutator	SNP	3490112	3490112	313	3490112	C&rarr;T	<font class=snp_type_nonsynonymous>A105T</font>&nbsp;(<font class=mutation_in_codon>G</font>CG&rarr;<font class=mutation_in_codon>A</font>CG)&nbsp;	glpE	glpE	<i>glpE</i>&nbsp;&larr;	thiosulfate sulfurtransferase	thiosulfate sulfurtransferase	ECB_03276	snp_nonsynonymous	nonsynonymous	11330
3544	LTEE	Ara-1	50000	REL11330	A	point-mutator	SNP	3492316	3492316	intergenic (+197/+19)	3492316	T&rarr;G	intergenic&nbsp;(+197/+19)	glpD,yzgL	glpD/yzgL	<i>glpD</i>&nbsp;&rarr;&nbsp;/&nbsp;&larr;&nbsp;<i>yzgL</i>	sn-glycerol-3-phosphate dehydrogenase, aerobic, FAD/NAD(P)-binding/hypothetical protein; b3427_1	sn&#8209;glycerol&#8209;3&#8209;phosphate dehydrogenase, aerobic, FAD/NAD(P)&#8209;binding/hypothetical protein; b3427_1	ECB_03277/ECB_03278	snp_intergenic	intergenic	11330
3545	LTEE	Ara-1	50000	REL11330	A	point-mutator	SNP	3493524	3493524	406	3493524	T&rarr;G	<font class=snp_type_nonsynonymous>T136P</font>&nbsp;(<font class=mutation_in_codon>A</font>CC&rarr;<font class=mutation_in_codon>C</font>CC)&nbsp;	ECB_03279	ECB_03279	<i>ECB_03279</i>&nbsp;&larr;	hypothetical protein	hypothetical protein	ECB_03279	snp_nonsynonymous	nonsynonymous	11330
3546	LTEE	Ara-1	50000	REL11330	A	point-mutator	SNP	3493684	3493684	246	3493684	A&rarr;C	<font class=snp_type_nonsynonymous>D82E</font>&nbsp;(GA<font class=mutation_in_codon>T</font>&rarr;GA<font class=mutation_in_codon>G</font>)&nbsp;	ECB_03279	ECB_03279	<i>ECB_03279</i>&nbsp;&larr;	hypothetical protein	hypothetical protein	ECB_03279	snp_nonsynonymous	nonsynonymous	11330
3547	LTEE	Ara-1	50000	REL11330	A	point-mutator	SNP	3506840	3506840	317	3506840	T&rarr;G	<font class=snp_type_nonsynonymous>F106C</font>&nbsp;(T<font class=mutation_in_codon>T</font>T&rarr;T<font class=mutation_in_codon>G</font>T)&nbsp;	yhgN	yhgN	<i>yhgN</i>&nbsp;&rarr;	predicted antibiotic transporter	predicted antibiotic transporter	ECB_03286	snp_nonsynonymous	nonsynonymous	11330
3548	LTEE	Ara-1	50000	REL11330	A	point-mutator	SNP	3507107	3507107	584	3507107	T&rarr;G	<font class=snp_type_nonsynonymous>M195R</font>&nbsp;(A<font class=mutation_in_codon>T</font>G&rarr;A<font class=mutation_in_codon>G</font>G)&nbsp;	yhgN	yhgN	<i>yhgN</i>&nbsp;&rarr;	predicted antibiotic transporter	predicted antibiotic transporter	ECB_03286	snp_nonsynonymous	nonsynonymous	11330
3549	LTEE	Ara-1	50000	REL11330	A	point-mutator	SNP	3514291	3514291	976	3514291	A&rarr;C	<font class=snp_type_nonsynonymous>K326Q</font>&nbsp;(<font class=mutation_in_codon>A</font>AA&rarr;<font class=mutation_in_codon>C</font>AA)&nbsp;	yhhZ	yhhZ	<i>yhhZ</i>&nbsp;&rarr;	hypothetical protein	hypothetical protein	ECB_03293	snp_nonsynonymous	nonsynonymous	11330
3550	LTEE	Ara-1	50000	REL11330	A	point-mutator	SNP	3517253	3517253	247	3517253	G&rarr;A	<font class=snp_type_synonymous>L83L</font>&nbsp;(<font class=mutation_in_codon>C</font>TG&rarr;<font class=mutation_in_codon>T</font>TG)&nbsp;	ggt	ggt	<i>ggt</i>&nbsp;&larr;	gamma-glutamyltranspeptidase periplasmic precursor	gamma&#8209;glutamyltranspeptidase periplasmic precursor	ECB_03296	snp_synonymous	synonymous	11330
3551	LTEE	Ara-1	50000	REL11330	A	point-mutator	SNP	3517880	3517880	262	3517880	C&rarr;A	<font class=snp_type_synonymous>R88R</font>&nbsp;(<font class=mutation_in_codon>C</font>GA&rarr;<font class=mutation_in_codon>A</font>GA)&nbsp;	yhhA	yhhA	<i>yhhA</i>&nbsp;&rarr;	hypothetical protein	hypothetical protein	ECB_03297	snp_synonymous	synonymous	11330
3552	LTEE	Ara-1	50000	REL11330	A	point-mutator	SNP	3519804	3519804	53	3519804	T&rarr;G	<font class=snp_type_nonsynonymous>Q18P</font>&nbsp;(C<font class=mutation_in_codon>A</font>G&rarr;C<font class=mutation_in_codon>C</font>G)&nbsp;	ugpC	ugpC	<i>ugpC</i>&nbsp;&larr;	glycerol-3-phosphate transporter subunit	glycerol&#8209;3&#8209;phosphate transporter subunit	ECB_03299	snp_nonsynonymous	nonsynonymous	11330
3553	LTEE	Ara-1	50000	REL11330	A	point-mutator	SNP	3527310	3527310	925	3527310	A&rarr;C	<font class=snp_type_nonsynonymous>S309A</font>&nbsp;(<font class=mutation_in_codon>T</font>CT&rarr;<font class=mutation_in_codon>G</font>CT)&nbsp;	livK	livK	<i>livK</i>&nbsp;&larr;	leucine transporter subunit	leucine transporter subunit	ECB_03307	snp_nonsynonymous	nonsynonymous	11330
3554	LTEE	Ara-1	50000	REL11330	A	point-mutator	SNP	3530013	3530013	331	3530013	T&rarr;G	<font class=snp_type_nonsynonymous>I111L</font>&nbsp;(<font class=mutation_in_codon>A</font>TC&rarr;<font class=mutation_in_codon>C</font>TC)&nbsp;	livJ	livJ	<i>livJ</i>&nbsp;&larr;	leucine/isoleucine/valine transporter subunit	leucine/isoleucine/valine transporter subunit	ECB_03309	snp_nonsynonymous	nonsynonymous	11330
3555	LTEE	Ara-1	50000	REL11330	A	point-mutator	SNP	3530992	3530992	477	3530992	A&rarr;C	<font class=snp_type_synonymous>R159R</font>&nbsp;(CG<font class=mutation_in_codon>T</font>&rarr;CG<font class=mutation_in_codon>G</font>)&nbsp;	rpoH	rpoH	<i>rpoH</i>&nbsp;&larr;	RNA polymerase sigma factor	RNA polymerase sigma factor	ECB_03310	snp_synonymous	synonymous	11330
3556	LTEE	Ara-1	50000	REL11330	A	point-mutator	SNP	3537761	3537761	623	3537761	T&rarr;G	<font class=snp_type_nonsynonymous>L208R</font>&nbsp;(C<font class=mutation_in_codon>T</font>G&rarr;C<font class=mutation_in_codon>G</font>G)&nbsp;	zntA	zntA	<i>zntA</i>&nbsp;&rarr;	zinc, cobalt and lead efflux system	zinc, cobalt and lead efflux system	ECB_03318	snp_nonsynonymous	nonsynonymous	11330
3557	LTEE	Ara-1	50000	REL11330	A	point-mutator	SNP	3540412	3540412	508	3540412	T&rarr;G	<font class=snp_type_nonsynonymous>F170V</font>&nbsp;(<font class=mutation_in_codon>T</font>TT&rarr;<font class=mutation_in_codon>G</font>TT)&nbsp;	yhhQ	yhhQ	<i>yhhQ</i>&nbsp;&rarr;	conserved inner membrane protein	conserved inner membrane protein	ECB_03320	snp_nonsynonymous	nonsynonymous	11330
3558	LTEE	Ara-1	50000	REL11330	A	point-mutator	SNP	3543278	3543278	726	3543278	A&rarr;C	<font class=snp_type_synonymous>V242V</font>&nbsp;(GT<font class=mutation_in_codon>A</font>&rarr;GT<font class=mutation_in_codon>C</font>)&nbsp;	yhhT	yhhT	<i>yhhT</i>&nbsp;&rarr;	predicted inner membrane protein	predicted inner membrane protein	ECB_03323	snp_synonymous	synonymous	11330
3559	LTEE	Ara-1	50000	REL11330	A	point-mutator	SNP	3543935	3543935	279	3543935	A&rarr;C	<font class=snp_type_nonsynonymous>E93D</font>&nbsp;(GA<font class=mutation_in_codon>A</font>&rarr;GA<font class=mutation_in_codon>C</font>)&nbsp;	acpT	acpT	<i>acpT</i>&nbsp;&rarr;	holo-(acyl carrier protein) synthase 2	holo&#8209;(acyl carrier protein) synthase 2	ECB_03324	snp_nonsynonymous	nonsynonymous	11330
3560	LTEE	Ara-1	50000	REL11330	A	point-mutator	SNP	3559403	3559403	824	3559403	A&rarr;C	<font class=snp_type_nonsynonymous>I275S</font>&nbsp;(A<font class=mutation_in_codon>T</font>T&rarr;A<font class=mutation_in_codon>G</font>T)&nbsp;	yhiH	yhiH	<i>yhiH</i>&nbsp;&larr;	fused ribosome-associated ATPase: ATP-binding protein/ATP-binding protein/predicted membrane protein	fused ribosome&#8209;associated ATPase: ATP&#8209;binding protein/ATP&#8209;binding protein/predicted membrane protein	ECB_03336	snp_nonsynonymous	nonsynonymous	11330
3561	LTEE	Ara-1	50000	REL11330	A	point-mutator	SNP	3559434	3559434	793	3559434	T&rarr;G	<font class=snp_type_nonsynonymous>I265L</font>&nbsp;(<font class=mutation_in_codon>A</font>TC&rarr;<font class=mutation_in_codon>C</font>TC)&nbsp;	yhiH	yhiH	<i>yhiH</i>&nbsp;&larr;	fused ribosome-associated ATPase: ATP-binding protein/ATP-binding protein/predicted membrane protein	fused ribosome&#8209;associated ATPase: ATP&#8209;binding protein/ATP&#8209;binding protein/predicted membrane protein	ECB_03336	snp_nonsynonymous	nonsynonymous	11330
3562	LTEE	Ara-1	50000	REL11330	A	point-mutator	SNP	3562760	3562760	519	3562760	T&rarr;G	<font class=snp_type_synonymous>T173T</font>&nbsp;(AC<font class=mutation_in_codon>A</font>&rarr;AC<font class=mutation_in_codon>C</font>)&nbsp;	yhiJ	yhiJ	<i>yhiJ</i>&nbsp;&larr;	hypothetical protein	hypothetical protein	ECB_03338	snp_synonymous	synonymous	11330
3563	LTEE	Ara-1	50000	REL11330	A	point-mutator	SNP	3562858	3562858	421	3562858	T&rarr;G	<font class=snp_type_nonsynonymous>N141H</font>&nbsp;(<font class=mutation_in_codon>A</font>AT&rarr;<font class=mutation_in_codon>C</font>AT)&nbsp;	yhiJ	yhiJ	<i>yhiJ</i>&nbsp;&larr;	hypothetical protein	hypothetical protein	ECB_03338	snp_nonsynonymous	nonsynonymous	11330
3564	LTEE	Ara-1	50000	REL11330	A	point-mutator	SNP	3564485	3564485	663	3564485	T&rarr;G	<font class=snp_type_synonymous>G221G</font>&nbsp;(GG<font class=mutation_in_codon>A</font>&rarr;GG<font class=mutation_in_codon>C</font>)&nbsp;	yhiKL	yhiKL	<i>yhiKL</i>&nbsp;&larr;	hypothetical protein	hypothetical protein	ECB_03339	snp_synonymous	synonymous	11330
3565	LTEE	Ara-1	50000	REL11330	A	point-mutator	SNP	3566725	3566725	intergenic (+143/+172)	3566725	T&rarr;G	intergenic&nbsp;(+143/+172)	yhiM,yhiN	yhiM/yhiN	<i>yhiM</i>&nbsp;&rarr;&nbsp;/&nbsp;&larr;&nbsp;<i>yhiN</i>	conserved inner membrane protein/predicted oxidoreductase with FAD/NAD(P)-binding domain	conserved inner membrane protein/predicted oxidoreductase with FAD/NAD(P)&#8209;binding domain	ECB_03340/ECB_03341	snp_intergenic	intergenic	11330
3566	LTEE	Ara-1	50000	REL11330	A	point-mutator	SNP	3570224	3570224	186	3570224	G&rarr;T	<font class=snp_type_synonymous>L62L</font>&nbsp;(CT<font class=mutation_in_codon>C</font>&rarr;CT<font class=mutation_in_codon>A</font>)&nbsp;	yhiO	yhiO	<i>yhiO</i>&nbsp;&larr;	universal stress protein UspB	universal stress protein UspB	ECB_03343	snp_synonymous	synonymous	11330
3567	LTEE	Ara-1	50000	REL11330	A	point-mutator	SNP	3574318	3574318	1555	3574318	A&rarr;C	<font class=snp_type_nonsynonymous>S519A</font>&nbsp;(<font class=mutation_in_codon>T</font>CT&rarr;<font class=mutation_in_codon>G</font>CT)&nbsp;	prlC	prlC	<i>prlC</i>&nbsp;&larr;	oligopeptidase A	oligopeptidase A	ECB_03347	snp_nonsynonymous	nonsynonymous	11330
3568	LTEE	Ara-1	50000	REL11330	A	point-mutator	SNP	3577813	3577813	825	3577813	T&rarr;G	<font class=snp_type_synonymous>A275A</font>&nbsp;(GC<font class=mutation_in_codon>T</font>&rarr;GC<font class=mutation_in_codon>G</font>)&nbsp;	gor	gor	<i>gor</i>&nbsp;&rarr;	glutathione reductase	glutathione reductase	ECB_03349	snp_synonymous	synonymous	11330
3569	LTEE	Ara-1	50000	REL11330	A	point-mutator	SNP	3581085	3581085	159	3581085	T&rarr;G	<font class=snp_type_nonsynonymous>I53M</font>&nbsp;(AT<font class=mutation_in_codon>T</font>&rarr;AT<font class=mutation_in_codon>G</font>)&nbsp;	arsC	arsC	<i>arsC</i>&nbsp;&rarr;	arsenate reductase	arsenate reductase	ECB_03352	snp_nonsynonymous	nonsynonymous	11330
3570	LTEE	Ara-1	50000	REL11330	A	point-mutator	SNP	3581373	3581373	intergenic (+21/-608)	3581373	A&rarr;C	intergenic&nbsp;(+21/&#8209;608)	arsC,yhiS	arsC/yhiS	<i>arsC</i>&nbsp;&rarr;&nbsp;/&nbsp;&rarr;&nbsp;<i>yhiS</i>	arsenate reductase/hypothetical protein	arsenate reductase/hypothetical protein	ECB_03352/ECB_03353	snp_intergenic	intergenic	11330
3571	LTEE	Ara-1	50000	REL11330	A	point-mutator	SNP	3583174	3583174	1194	3583174	A&rarr;C	<font class=snp_type_nonsynonymous>L398F</font>&nbsp;(TT<font class=mutation_in_codon>A</font>&rarr;TT<font class=mutation_in_codon>C</font>)&nbsp;	yhiS	yhiS	<i>yhiS</i>&nbsp;&rarr;	hypothetical protein	hypothetical protein	ECB_03353	snp_nonsynonymous	nonsynonymous	11330
3572	LTEE	Ara-1	50000	REL11330	A	point-mutator	SNP	3595854	3595854	1218	3595854	A&rarr;C	<font class=snp_type_synonymous>V406V</font>&nbsp;(GT<font class=mutation_in_codon>T</font>&rarr;GT<font class=mutation_in_codon>G</font>)&nbsp;	gadA	gadA	<i>gadA</i>&nbsp;&larr;	glutamate decarboxylase A, PLP-dependent	glutamate decarboxylase A, PLP&#8209;dependent	ECB_03365	snp_synonymous	synonymous	11330
3573	LTEE	Ara-1	50000	REL11330	A	point-mutator	SNP	3601216	3601216	171	3601216	A&rarr;C	<font class=snp_type_nonsynonymous>D57E</font>&nbsp;(GA<font class=mutation_in_codon>T</font>&rarr;GA<font class=mutation_in_codon>G</font>)&nbsp;	yhjB	yhjB	<i>yhjB</i>&nbsp;&larr;	predicted DNA-binding response regulator in two-component regulatory system	predicted DNA&#8209;binding response regulator in two&#8209;component regulatory system	ECB_03368	snp_nonsynonymous	nonsynonymous	11330
3574	LTEE	Ara-1	50000	REL11330	A	point-mutator	SNP	3605664	3605664	intergenic (+64/+118)	3605664	T&rarr;G	intergenic&nbsp;(+64/+118)	yhjE,yhjG	yhjE/yhjG	<i>yhjE</i>&nbsp;&rarr;&nbsp;/&nbsp;&larr;&nbsp;<i>yhjG</i>	predicted transporter/predicted outer membrane biogenesis protein	predicted transporter/predicted outer membrane biogenesis protein	ECB_03371/ECB_03372	snp_intergenic	intergenic	11330
3575	LTEE	Ara-1	50000	REL11330	A	point-mutator	SNP	3613023	3613023	intergenic (-84/+99)	3613023	A&rarr;C	intergenic&nbsp;(&#8209;84/+99)	dctA,yhjK	dctA/yhjK	<i>dctA</i>&nbsp;&larr;&nbsp;/&nbsp;&larr;&nbsp;<i>yhjK</i>	C4-dicarboxylate transport protein/predicted diguanylate cyclase	C4&#8209;dicarboxylate transport protein/predicted diguanylate cyclase	ECB_03376/ECB_03377	snp_intergenic	intergenic	11330
3576	LTEE	Ara-1	50000	REL11330	A	point-mutator	SNP	3613073	3613073	intergenic (-134/+49)	3613073	G&rarr;T	intergenic&nbsp;(&#8209;134/+49)	dctA,yhjK	dctA/yhjK	<i>dctA</i>&nbsp;&larr;&nbsp;/&nbsp;&larr;&nbsp;<i>yhjK</i>	C4-dicarboxylate transport protein/predicted diguanylate cyclase	C4&#8209;dicarboxylate transport protein/predicted diguanylate cyclase	ECB_03376/ECB_03377	snp_intergenic	intergenic	11330
3577	LTEE	Ara-1	50000	REL11330	A	point-mutator	SNP	3614898	3614898	174	3614898	A&rarr;C	<font class=snp_type_synonymous>A58A</font>&nbsp;(GC<font class=mutation_in_codon>T</font>&rarr;GC<font class=mutation_in_codon>G</font>)&nbsp;	yhjK	yhjK	<i>yhjK</i>&nbsp;&larr;	predicted diguanylate cyclase	predicted diguanylate cyclase	ECB_03377	snp_synonymous	synonymous	11330
3578	LTEE	Ara-1	50000	REL11330	A	point-mutator	SNP	3620566	3620566	1534	3620566	T&rarr;G	<font class=snp_type_nonsynonymous>I512L</font>&nbsp;(<font class=mutation_in_codon>A</font>TT&rarr;<font class=mutation_in_codon>C</font>TT)&nbsp;	yhjN	yhjN	<i>yhjN</i>&nbsp;&larr;	regulator of cellulose synthase, cyclic di-GMP binding	regulator of cellulose synthase, cyclic di&#8209;GMP binding	ECB_03380	snp_nonsynonymous	nonsynonymous	11330
3579	LTEE	Ara-1	50000	REL11330	A	point-mutator	SNP	3622487	3622487	2242	3622487	A&rarr;C	<font class=snp_type_nonsynonymous>L748V</font>&nbsp;(<font class=mutation_in_codon>T</font>TG&rarr;<font class=mutation_in_codon>G</font>TG)&nbsp;	yhjO	yhjO	<i>yhjO</i>&nbsp;&larr;	cellulose synthase, catalytic subunit	cellulose synthase, catalytic subunit	ECB_03381	snp_nonsynonymous	nonsynonymous	11330
3580	LTEE	Ara-1	50000	REL11330	A	point-mutator	SNP	3624864	3624864	pseudogene (599/738 nt)	3624864	A&rarr;C	pseudogene&nbsp;(599/738&nbsp;nt)	yhjQ	yhjQ	<i>yhjQ</i>&nbsp;&larr;	b3534; cell division protein (chromosome partitioning ATPase)	b3534; cell division protein (chromosome partitioning ATPase)	ECB_03382	snp_pseudogene	pseudogene	11330
3581	LTEE	Ara-1	50000	REL11330	A	point-mutator	SNP	3628847	3628847	1142	3628847	A&rarr;C	<font class=snp_type_nonsynonymous>D381A</font>&nbsp;(G<font class=mutation_in_codon>A</font>T&rarr;G<font class=mutation_in_codon>C</font>T)&nbsp;	yhjU	yhjU	<i>yhjU</i>&nbsp;&rarr;	predicted inner membrane protein	predicted inner membrane protein	ECB_03386	snp_nonsynonymous	nonsynonymous	11330
3582	LTEE	Ara-1	50000	REL11330	A	point-mutator	SNP	3630897	3630897	intergenic (-352/-124)	3630897	A&rarr;C	intergenic&nbsp;(&#8209;352/&#8209;124)	ldrD,yhjV	ldrD/yhjV	<i>ldrD</i>&nbsp;&larr;&nbsp;/&nbsp;&rarr;&nbsp;<i>yhjV</i>	toxic polypeptide, small/predicted transporter	toxic polypeptide, small/predicted transporter	ECB_03389/ECB_03390	snp_intergenic	intergenic	11330
3583	LTEE	Ara-1	50000	REL11330	A	point-mutator	SNP	3635650	3635650	599	3635650	T&rarr;G	<font class=snp_type_nonsynonymous>D200A</font>&nbsp;(G<font class=mutation_in_codon>A</font>T&rarr;G<font class=mutation_in_codon>C</font>T)&nbsp;	dppB	dppB	<i>dppB</i>&nbsp;&larr;	dipeptide transporter	dipeptide transporter	ECB_03394	snp_nonsynonymous	nonsynonymous	11330
3584	LTEE	Ara-1	50000	REL11330	A	point-mutator	SNP	3638165	3638165	intergenic (-2/+909)	3638165	A&rarr;C	intergenic&nbsp;(&#8209;2/+909)	dppA,proK	dppA/proK	<i>dppA</i>&nbsp;&larr;&nbsp;/&nbsp;&larr;&nbsp;<i>proK</i>	dipeptide transporter/tRNA-Pro	dipeptide transporter/tRNA&#8209;Pro	ECB_03395/ECB_t00062	snp_intergenic	intergenic	11330
3585	LTEE	Ara-1	50000	REL11330	A	point-mutator	SNP	3641648	3641648	818	3641648	A&rarr;C	<font class=snp_type_nonsynonymous>L273R</font>&nbsp;(C<font class=mutation_in_codon>T</font>G&rarr;C<font class=mutation_in_codon>G</font>G)&nbsp;	yhjX	yhjX	<i>yhjX</i>&nbsp;&larr;	predicted transporter	predicted transporter	ECB_03397	snp_nonsynonymous	nonsynonymous	11330
3586	LTEE	Ara-1	50000	REL11330	A	point-mutator	SNP	3643009	3643009	384	3643009	A&rarr;C	<font class=snp_type_synonymous>T128T</font>&nbsp;(AC<font class=mutation_in_codon>T</font>&rarr;AC<font class=mutation_in_codon>G</font>)&nbsp;	yhjY	yhjY	<i>yhjY</i>&nbsp;&larr;	hypothetical protein	hypothetical protein	ECB_03398	snp_synonymous	synonymous	11330
3587	LTEE	Ara-1	50000	REL11330	A	point-mutator	SNP	3644741	3644741	2058	3644741	T&rarr;G	<font class=snp_type_synonymous>G686G</font>&nbsp;(GG<font class=mutation_in_codon>A</font>&rarr;GG<font class=mutation_in_codon>C</font>)&nbsp;	bisC	bisC	<i>bisC</i>&nbsp;&larr;	biotin sulfoxide reductase	biotin sulfoxide reductase	ECB_03401	snp_synonymous	synonymous	11330
3588	LTEE	Ara-1	50000	REL11330	A	point-mutator	SNP	3655740	3655740	37	3655740	T&rarr;G	<font class=snp_type_nonsynonymous>I13L</font>&nbsp;(<font class=mutation_in_codon>A</font>TC&rarr;<font class=mutation_in_codon>C</font>TC)&nbsp;	glyQ	glyQ	<i>glyQ</i>&nbsp;&larr;	glycyl-tRNA synthetase subunit alpha	glycyl&#8209;tRNA synthetase subunit alpha	ECB_03411	snp_nonsynonymous	nonsynonymous	11330
3589	LTEE	Ara-1	50000	REL11330	A	point-mutator	SNP	3661307	3661307	intergenic (-84/-282)	3661307	T&rarr;G	intergenic&nbsp;(&#8209;84/&#8209;282)	xylA,xylF	xylA/xylF	<i>xylA</i>&nbsp;&larr;&nbsp;/&nbsp;&rarr;&nbsp;<i>xylF</i>	xylose isomerase/D-xylose transporter subunit	xylose isomerase/D&#8209;xylose transporter subunit	ECB_03417/ECB_03418	snp_intergenic	intergenic	11330
3590	LTEE	Ara-1	50000	REL11330	A	point-mutator	SNP	3668060	3668060	108	3668060	T&rarr;G	<font class=snp_type_nonsynonymous>F36L</font>&nbsp;(TT<font class=mutation_in_codon>T</font>&rarr;TT<font class=mutation_in_codon>G</font>)&nbsp;	malS	malS	<i>malS</i>&nbsp;&rarr;	periplasmic alpha-amylase precursor	periplasmic alpha&#8209;amylase precursor	ECB_03423	snp_nonsynonymous	nonsynonymous	11330
3591	LTEE	Ara-1	50000	REL11330	A	point-mutator	SNP	3675671	3675671	412	3675671	G&rarr;T	<font class=snp_type_nonsynonymous>G138W</font>&nbsp;(<font class=mutation_in_codon>G</font>GG&rarr;<font class=mutation_in_codon>T</font>GG)&nbsp;	yiaN	yiaN	<i>yiaN</i>&nbsp;&rarr;	predicted transporter	predicted transporter	ECB_03430	snp_nonsynonymous	nonsynonymous	11330
3592	LTEE	Ara-1	50000	REL11330	A	point-mutator	SNP	3678300	3678300	761	3678300	A&rarr;C	<font class=snp_type_nonsynonymous>E254A</font>&nbsp;(G<font class=mutation_in_codon>A</font>A&rarr;G<font class=mutation_in_codon>C</font>A)&nbsp;	lyxK	lyxK	<i>lyxK</i>&nbsp;&rarr;	L-xylulose kinase	L&#8209;xylulose kinase	ECB_03432	snp_nonsynonymous	nonsynonymous	11330
3593	LTEE	Ara-1	50000	REL11330	A	point-mutator	SNP	3679502	3679502	470	3679502	A&rarr;C	<font class=snp_type_nonsynonymous>K157T</font>&nbsp;(A<font class=mutation_in_codon>A</font>G&rarr;A<font class=mutation_in_codon>C</font>G)&nbsp;	sgbH	sgbH	<i>sgbH</i>&nbsp;&rarr;	3-keto-L-gulonate 6-phosphate decarboxylase	3&#8209;keto&#8209;L&#8209;gulonate 6&#8209;phosphate decarboxylase	ECB_03433	snp_nonsynonymous	nonsynonymous	11330
3594	LTEE	Ara-1	50000	REL11330	A	point-mutator	SNP	3680670	3680670	129	3680670	T&rarr;G	<font class=snp_type_synonymous>P43P</font>&nbsp;(CC<font class=mutation_in_codon>T</font>&rarr;CC<font class=mutation_in_codon>G</font>)&nbsp;	sgbE	sgbE	<i>sgbE</i>&nbsp;&rarr;	L-ribulose-5-phosphate 4-epimerase	L&#8209;ribulose&#8209;5&#8209;phosphate 4&#8209;epimerase	ECB_03435	snp_synonymous	synonymous	11330
3595	LTEE	Ara-1	50000	REL11330	A	point-mutator	SNP	3683129	3683129	820	3683129	T&rarr;G	<font class=snp_type_nonsynonymous>L274V</font>&nbsp;(<font class=mutation_in_codon>T</font>TA&rarr;<font class=mutation_in_codon>G</font>TA)&nbsp;	ECB_03437	ECB_03437	<i>ECB_03437</i>&nbsp;&rarr;	putative permease	putative permease	ECB_03437	snp_nonsynonymous	nonsynonymous	11330
3596	LTEE	Ara-1	50000	REL11330	A	point-mutator	SNP	3685258	3685258	1538	3685258	A&rarr;C	<font class=snp_type_nonsynonymous>Y513S</font>&nbsp;(T<font class=mutation_in_codon>A</font>T&rarr;T<font class=mutation_in_codon>C</font>T)&nbsp;	ECB_03438	ECB_03438	<i>ECB_03438</i>&nbsp;&rarr;	conserved hypothetical protein	conserved hypothetical protein	ECB_03438	snp_nonsynonymous	nonsynonymous	11330
3597	LTEE	Ara-1	50000	REL11330	A	point-mutator	SNP	3696775	3696775	intergenic (-127/-102)	3696775	A&rarr;C	intergenic&nbsp;(&#8209;127/&#8209;102)	yibF,rhsA	yibF/rhsA	<i>yibF</i>&nbsp;&larr;&nbsp;/&nbsp;&rarr;&nbsp;<i>rhsA</i>	predicted glutathione S-transferase/rhsA element core protein RshA	predicted glutathione S&#8209;transferase/rhsA element core protein RshA	ECB_03447/ECB_03448	snp_intergenic	intergenic	11330
3598	LTEE	Ara-1	50000	REL11330	A	point-mutator	SNP	3699461	3699461	2585	3699461	A&rarr;C	<font class=snp_type_nonsynonymous>N862T</font>&nbsp;(A<font class=mutation_in_codon>A</font>C&rarr;A<font class=mutation_in_codon>C</font>C)&nbsp;	rhsA	rhsA	<i>rhsA</i>&nbsp;&rarr;	rhsA element core protein RshA	rhsA element core protein RshA	ECB_03448	snp_nonsynonymous	nonsynonymous	11330
3599	LTEE	Ara-1	50000	REL11330	A	point-mutator	DEL	3701734	3701734	coding (704/843 nt)	3701734	(A)<sub>9&rarr;8</sub>	coding&nbsp;(704/843&nbsp;nt)	yibA	yibA	<i>yibA</i>&nbsp;&rarr;	lyase containing HEAT-repeat	lyase containing HEAT&#8209;repeat	ECB_03449	small_indel	not_snp	11330
3600	LTEE	Ara-1	50000	REL11330	A	point-mutator	SNP	3704259	3704259	intergenic (+927/+677)	3704259	T&rarr;G	intergenic&nbsp;(+927/+677)	yibG,yibH	yibG/yibH	<i>yibG</i>&nbsp;&rarr;&nbsp;/&nbsp;&larr;&nbsp;<i>yibH</i>	hypothetical protein/hypothetical protein	hypothetical protein/hypothetical protein	ECB_03451/ECB_03452	snp_intergenic	intergenic	11330
3601	LTEE	Ara-1	50000	REL11330	A	point-mutator	SNP	3720574	3720574	711	3720574	T&rarr;G	<font class=snp_type_synonymous>A237A</font>&nbsp;(GC<font class=mutation_in_codon>T</font>&rarr;GC<font class=mutation_in_codon>G</font>)&nbsp;	lldR	lldR	<i>lldR</i>&nbsp;&rarr;	DNA-binding transcriptional repressor	DNA&#8209;binding transcriptional repressor	ECB_03462	snp_synonymous	synonymous	11330
3602	LTEE	Ara-1	50000	REL11330	A	point-mutator	SNP	3720948	3720948	312	3720948	T&rarr;G	<font class=snp_type_synonymous>T104T</font>&nbsp;(AC<font class=mutation_in_codon>T</font>&rarr;AC<font class=mutation_in_codon>G</font>)&nbsp;	lldD	lldD	<i>lldD</i>&nbsp;&rarr;	L-lactate dehydrogenase, FMN-linked	L&#8209;lactate dehydrogenase, FMN&#8209;linked	ECB_03463	snp_synonymous	synonymous	11330
3603	LTEE	Ara-1	50000	REL11330	A	point-mutator	SNP	3727869	3727869	266	3727869	T&rarr;G	<font class=snp_type_nonsynonymous>L89R</font>&nbsp;(C<font class=mutation_in_codon>T</font>C&rarr;C<font class=mutation_in_codon>G</font>C)&nbsp;	yibP	yibP	<i>yibP</i>&nbsp;&rarr;	protease with a role in cell division	protease with a role in cell division	ECB_03471	snp_nonsynonymous	nonsynonymous	11330
3604	LTEE	Ara-1	50000	REL11330	A	point-mutator	SNP	3729979	3729979	869	3729979	A&rarr;C	<font class=snp_type_nonsynonymous>M290R</font>&nbsp;(A<font class=mutation_in_codon>T</font>G&rarr;A<font class=mutation_in_codon>G</font>G)&nbsp;	yibD	yibD	<i>yibD</i>&nbsp;&larr;	predicted glycosyl transferase	predicted glycosyl transferase	ECB_03473	snp_nonsynonymous	nonsynonymous	11330
3605	LTEE	Ara-1	50000	REL11330	A	point-mutator	SNP	3739217	3739217	749	3739217	T&rarr;G	<font class=snp_type_nonsynonymous>E250A</font>&nbsp;(G<font class=mutation_in_codon>A</font>A&rarr;G<font class=mutation_in_codon>C</font>A)&nbsp;	waaW	waaW	<i>waaW</i>&nbsp;&larr;	UDP-galactose:(Galactosyl) LPS alpha1,2-galactosyltransferase	UDP&#8209;galactose:(Galactosyl) LPS alpha1,2&#8209;galactosyltransferase	ECB_03481	snp_nonsynonymous	nonsynonymous	11330
3606	LTEE	Ara-1	50000	REL11330	A	point-mutator	SNP	3749420	3749420	88	3749420	T&rarr;G	<font class=snp_type_nonsynonymous>N30H</font>&nbsp;(<font class=mutation_in_codon>A</font>AC&rarr;<font class=mutation_in_codon>C</font>AC)&nbsp;	mutM	mutM	<i>mutM</i>&nbsp;&larr;	formamidopyrimidine-DNA glycosylase	formamidopyrimidine&#8209;DNA glycosylase	ECB_03492	snp_nonsynonymous	nonsynonymous	11330
3607	LTEE	Ara-1	50000	REL11330	A	point-mutator	SNP	3753313	3753313	465	3753313	A&rarr;C	<font class=snp_type_nonsynonymous>E155D</font>&nbsp;(GA<font class=mutation_in_codon>A</font>&rarr;GA<font class=mutation_in_codon>C</font>)&nbsp;	slmA	slmA	<i>slmA</i>&nbsp;&rarr;	nucleoid occlusion protein	nucleoid occlusion protein	ECB_03498	snp_nonsynonymous	nonsynonymous	11330
3608	LTEE	Ara-1	50000	REL11330	A	point-mutator	SNP	3756094	3756094	intergenic (+199/-10)	3756094	T&rarr;G	intergenic&nbsp;(+199/&#8209;10)	yicC,dinD	yicC/dinD	<i>yicC</i>&nbsp;&rarr;&nbsp;/&nbsp;&rarr;&nbsp;<i>dinD</i>	hypothetical protein/DNA-damage-inducible protein	hypothetical protein/DNA&#8209;damage&#8209;inducible protein	ECB_03501/ECB_03502	snp_intergenic	intergenic	11330
3609	LTEE	Ara-1	50000	REL11330	A	point-mutator	SNP	3757779	3757779	549	3757779	T&rarr;G	<font class=snp_type_nonsynonymous>F183L</font>&nbsp;(TT<font class=mutation_in_codon>T</font>&rarr;TT<font class=mutation_in_codon>G</font>)&nbsp;	yicG	yicG	<i>yicG</i>&nbsp;&rarr;	conserved inner membrane protein	conserved inner membrane protein	ECB_03503	snp_nonsynonymous	nonsynonymous	11330
3610	LTEE	Ara-1	50000	REL11330	A	point-mutator	SNP	3759405	3759405	123	3759405	T&rarr;G	<font class=snp_type_synonymous>I41I</font>&nbsp;(AT<font class=mutation_in_codon>A</font>&rarr;AT<font class=mutation_in_codon>C</font>)&nbsp;	yicF	yicF	<i>yicF</i>&nbsp;&larr;	NAD-dependent DNA ligase LigB	NAD&#8209;dependent DNA ligase LigB	ECB_03504	snp_synonymous	synonymous	11330
3611	LTEE	Ara-1	50000	REL11330	A	point-mutator	SNP	3762741	3762741	1985	3762741	A&rarr;T	<font class=snp_type_nonsynonymous>K662I</font>&nbsp;(A<font class=mutation_in_codon>A</font>A&rarr;A<font class=mutation_in_codon>T</font>A)&nbsp;	spoT	spoT	<i>spoT</i>&nbsp;&rarr;	bifunctional (p)ppGpp synthetase II/ guanosine-3',5'-bis pyrophosphate 3'-pyrophosphohydrolase	bifunctional (p)ppGpp synthetase II/ guanosine&#8209;3',5'&#8209;bis pyrophosphate 3'&#8209;pyrophosphohydrolase	ECB_03507	snp_nonsynonymous	nonsynonymous	11330
3612	LTEE	Ara-1	50000	REL11330	A	point-mutator	SNP	3766565	3766565	1143	3766565	A&rarr;C	<font class=snp_type_nonsynonymous>F381L</font>&nbsp;(TT<font class=mutation_in_codon>T</font>&rarr;TT<font class=mutation_in_codon>G</font>)&nbsp;	gltS	gltS	<i>gltS</i>&nbsp;&larr;	glutamate transporter	glutamate transporter	ECB_03511	snp_nonsynonymous	nonsynonymous	11330
3613	LTEE	Ara-1	50000	REL11330	A	point-mutator	SNP	3766861	3766861	847	3766861	A&rarr;C	<font class=snp_type_nonsynonymous>L283V</font>&nbsp;(<font class=mutation_in_codon>T</font>TG&rarr;<font class=mutation_in_codon>G</font>TG)&nbsp;	gltS	gltS	<i>gltS</i>&nbsp;&larr;	glutamate transporter	glutamate transporter	ECB_03511	snp_nonsynonymous	nonsynonymous	11330
3614	LTEE	Ara-1	50000	REL11330	A	point-mutator	SNP	3768014	3768014	28	3768014	A&rarr;C	<font class=snp_type_nonsynonymous>N10H</font>&nbsp;(<font class=mutation_in_codon>A</font>AT&rarr;<font class=mutation_in_codon>C</font>AT)&nbsp;	yicE	yicE	<i>yicE</i>&nbsp;&rarr;	predicted transporter	predicted transporter	ECB_03512	snp_nonsynonymous	nonsynonymous	11330
3615	LTEE	Ara-1	50000	REL11330	A	point-mutator	SNP	3769919	3769919	421	3769919	A&rarr;C	<font class=snp_type_nonsynonymous>S141R</font>&nbsp;(<font class=mutation_in_codon>A</font>GC&rarr;<font class=mutation_in_codon>C</font>GC)&nbsp;	yicH	yicH	<i>yicH</i>&nbsp;&rarr;	hypothetical protein	hypothetical protein	ECB_03513	snp_nonsynonymous	nonsynonymous	11330
3616	LTEE	Ara-1	50000	REL11330	A	point-mutator	SNP	3775466	3775466	intergenic (+112/-192)	3775466	T&rarr;G	intergenic&nbsp;(+112/&#8209;192)	selC,ECB_03516	selC/ECB_03516	<i>selC</i>&nbsp;&rarr;&nbsp;/&nbsp;&rarr;&nbsp;<i>ECB_03516</i>	tRNA-Sec/Int	tRNA&#8209;Sec/Int	ECB_t00063/ECB_03516	snp_intergenic	intergenic	11330
3617	LTEE	Ara-1	50000	REL11330	A	point-mutator	SNP	3776874	3776874	intergenic (+32/-379)	3776874	A&rarr;C	intergenic&nbsp;(+32/&#8209;379)	ECB_03516,ECB_03517	ECB_03516/ECB_03517	<i>ECB_03516</i>&nbsp;&rarr;&nbsp;/&nbsp;&rarr;&nbsp;<i>ECB_03517</i>	Int/ShiA homolog	Int/ShiA homolog	ECB_03516/ECB_03517	snp_intergenic	intergenic	11330
3618	LTEE	Ara-1	50000	REL11330	A	point-mutator	SNP	3781398	3781398	63	3781398	A&rarr;C	<font class=snp_type_synonymous>L21L</font>&nbsp;(CT<font class=mutation_in_codon>A</font>&rarr;CT<font class=mutation_in_codon>C</font>)&nbsp;	ECB_03521	ECB_03521	<i>ECB_03521</i>&nbsp;&rarr;	conserved hypothetical protein	conserved hypothetical protein	ECB_03521	snp_synonymous	synonymous	11330
3619	LTEE	Ara-1	50000	REL11330	A	point-mutator	SNP	3786001	3786001	1092	3786001	A&rarr;C	<font class=snp_type_synonymous>R364R</font>&nbsp;(CG<font class=mutation_in_codon>A</font>&rarr;CG<font class=mutation_in_codon>C</font>)&nbsp;	ECB_03523	ECB_03523	<i>ECB_03523</i>&nbsp;&rarr;	TrbC-like protein	TrbC&#8209;like protein	ECB_03523	snp_synonymous	synonymous	11330
3620	LTEE	Ara-1	50000	REL11330	A	point-mutator	SNP	3786178	3786178	90	3786178	T&rarr;G	<font class=snp_type_synonymous>A30A</font>&nbsp;(GC<font class=mutation_in_codon>A</font>&rarr;GC<font class=mutation_in_codon>C</font>)&nbsp;	ECB_03524	ECB_03524	<i>ECB_03524</i>&nbsp;&larr;	transposase	transposase	ECB_03524	snp_synonymous	synonymous	11330
3621	LTEE	Ara-1	50000	REL11330	A	point-mutator	SNP	3786228	3786228	40	3786228	T&rarr;G	<font class=snp_type_nonsynonymous>N14H</font>&nbsp;(<font class=mutation_in_codon>A</font>AC&rarr;<font class=mutation_in_codon>C</font>AC)&nbsp;	ECB_03524	ECB_03524	<i>ECB_03524</i>&nbsp;&larr;	transposase	transposase	ECB_03524	snp_nonsynonymous	nonsynonymous	11330
3622	LTEE	Ara-1	50000	REL11330	A	point-mutator	SNP	3788555	3788555	315	3788555	A&rarr;C	<font class=snp_type_synonymous>G105G</font>&nbsp;(GG<font class=mutation_in_codon>A</font>&rarr;GG<font class=mutation_in_codon>C</font>)&nbsp;	ECB_03531	ECB_03531	<i>ECB_03531</i>&nbsp;&rarr;	hypothetical protein	hypothetical protein	ECB_03531	snp_synonymous	synonymous	11330
3623	LTEE	Ara-1	50000	REL11330	A	point-mutator	SNP	3792354	3792354	intergenic (+46/+19)	3792354	A&rarr;C	intergenic&nbsp;(+46/+19)	ECB_03532,ECB_03533	ECB_03532/ECB_03533	<i>ECB_03532</i>&nbsp;&rarr;&nbsp;/&nbsp;&larr;&nbsp;<i>ECB_03533</i>	hypothetical protein/hypothetical protein	hypothetical protein/hypothetical protein	ECB_03532/ECB_03533	snp_intergenic	intergenic	11330
3624	LTEE	Ara-1	50000	REL11330	A	point-mutator	SNP	3792743	3792743	2	3792743	A&rarr;C	<font class=snp_type_nonsynonymous>M1R</font>&nbsp;(A<font class=mutation_in_codon>T</font>G&rarr;A<font class=mutation_in_codon>G</font>G)&nbsp;&dagger;	ECB_03534	ECB_03534	<i>ECB_03534</i>&nbsp;&larr;	hypothetical protein	hypothetical protein	ECB_03534	snp_nonsynonymous	nonsynonymous	11330
3625	LTEE	Ara-1	50000	REL11330	A	point-mutator	SNP	3797813	3797813	929	3797813	T&rarr;G	<font class=snp_type_nonsynonymous>L310R</font>&nbsp;(C<font class=mutation_in_codon>T</font>G&rarr;C<font class=mutation_in_codon>G</font>G)&nbsp;	yicK	yicK	<i>yicK</i>&nbsp;&rarr;	predicted sugar efflux system	predicted sugar efflux system	ECB_03542	snp_nonsynonymous	nonsynonymous	11330
3626	LTEE	Ara-1	50000	REL11330	A	point-mutator	SNP	3797885	3797885	1001	3797885	T&rarr;G	<font class=snp_type_nonsynonymous>L334W</font>&nbsp;(T<font class=mutation_in_codon>T</font>G&rarr;T<font class=mutation_in_codon>G</font>G)&nbsp;	yicK	yicK	<i>yicK</i>&nbsp;&rarr;	predicted sugar efflux system	predicted sugar efflux system	ECB_03542	snp_nonsynonymous	nonsynonymous	11330
3627	LTEE	Ara-1	50000	REL11330	A	point-mutator	SNP	3801223	3801223	614	3801223	A&rarr;C	<font class=snp_type_nonsynonymous>F205C</font>&nbsp;(T<font class=mutation_in_codon>T</font>C&rarr;T<font class=mutation_in_codon>G</font>C)&nbsp;	yicM	yicM	<i>yicM</i>&nbsp;&larr;	predicted transporter	predicted transporter	ECB_03546	snp_nonsynonymous	nonsynonymous	11330
3628	LTEE	Ara-1	50000	REL11330	A	point-mutator	SNP	3805135	3805135	1240	3805135	A&rarr;C	<font class=snp_type_nonsynonymous>I414L</font>&nbsp;(<font class=mutation_in_codon>A</font>TC&rarr;<font class=mutation_in_codon>C</font>TC)&nbsp;	ade	ade	<i>ade</i>&nbsp;&rarr;	cryptic adenine deaminase	cryptic adenine deaminase	ECB_03549	snp_nonsynonymous	nonsynonymous	11330
3629	LTEE	Ara-1	50000	REL11330	A	point-mutator	SNP	3805357	3805357	1462	3805357	A&rarr;C	<font class=snp_type_nonsynonymous>M488L</font>&nbsp;(<font class=mutation_in_codon>A</font>TG&rarr;<font class=mutation_in_codon>C</font>TG)&nbsp;	ade	ade	<i>ade</i>&nbsp;&rarr;	cryptic adenine deaminase	cryptic adenine deaminase	ECB_03549	snp_nonsynonymous	nonsynonymous	11330
3630	LTEE	Ara-1	50000	REL11330	A	point-mutator	SNP	3813583	3813583	intergenic (-664/-270)	3813583	A&rarr;C	intergenic&nbsp;(&#8209;664/&#8209;270)	ivbL,emrD	ivbL/emrD	<i>ivbL</i>&nbsp;&larr;&nbsp;/&nbsp;&rarr;&nbsp;<i>emrD</i>	ilvB operon leader peptide/multidrug efflux system protein	ilvB operon leader peptide/multidrug efflux system protein	ECB_03556/ECB_03557	snp_intergenic	intergenic	11330
3631	LTEE	Ara-1	50000	REL11330	A	point-mutator	SNP	3816257	3816257	intergenic (-19/-90)	3816257	T&rarr;G	intergenic&nbsp;(&#8209;19/&#8209;90)	yidH,yidI	yidH/yidI	<i>yidH</i>&nbsp;&larr;&nbsp;/&nbsp;&rarr;&nbsp;<i>yidI</i>	conserved inner membrane protein/predicted inner membrane protein	conserved inner membrane protein/predicted inner membrane protein	ECB_03560/ECB_03561	snp_intergenic	intergenic	11330
3632	LTEE	Ara-1	50000	REL11330	A	point-mutator	SNP	3822363	3822363	65	3822363	A&rarr;C	<font class=snp_type_nonsynonymous>M22R</font>&nbsp;(A<font class=mutation_in_codon>T</font>G&rarr;A<font class=mutation_in_codon>G</font>G)&nbsp;	glvG	glvG	<i>glvG</i>&nbsp;&larr;	predicted 6-phospho-beta-glucosidase	predicted 6&#8209;phospho&#8209;beta&#8209;glucosidase	ECB_03565	snp_nonsynonymous	nonsynonymous	11330
3633	LTEE	Ara-1	50000	REL11330	A	point-mutator	SNP	3822640	3822640	1404	3822640	A&rarr;C	<font class=snp_type_nonsynonymous>N468K</font>&nbsp;(AA<font class=mutation_in_codon>T</font>&rarr;AA<font class=mutation_in_codon>G</font>)&nbsp;	glvBC	glvBC	<i>glvBC</i>&nbsp;&larr;	arbutin specific enzyme IIBC component of PTS	arbutin specific enzyme IIBC component of PTS	ECB_03566	snp_nonsynonymous	nonsynonymous	11330
3634	LTEE	Ara-1	50000	REL11330	A	point-mutator	SNP	3822763	3822763	1281	3822763	T&rarr;G	<font class=snp_type_synonymous>S427S</font>&nbsp;(TC<font class=mutation_in_codon>A</font>&rarr;TC<font class=mutation_in_codon>C</font>)&nbsp;	glvBC	glvBC	<i>glvBC</i>&nbsp;&larr;	arbutin specific enzyme IIBC component of PTS	arbutin specific enzyme IIBC component of PTS	ECB_03566	snp_synonymous	synonymous	11330
3635	LTEE	Ara-1	50000	REL11330	A	point-mutator	SNP	3829122	3829122	516	3829122	T&rarr;G	<font class=snp_type_nonsynonymous>Q172H</font>&nbsp;(CA<font class=mutation_in_codon>A</font>&rarr;CA<font class=mutation_in_codon>C</font>)&nbsp;	yidR	yidR	<i>yidR</i>&nbsp;&larr;	hypothetical protein	hypothetical protein	ECB_03572	snp_nonsynonymous	nonsynonymous	11330
3636	LTEE	Ara-1	50000	REL11330	A	point-mutator	SNP	3829499	3829499	139	3829499	T&rarr;G	<font class=snp_type_nonsynonymous>I47L</font>&nbsp;(<font class=mutation_in_codon>A</font>TC&rarr;<font class=mutation_in_codon>C</font>TC)&nbsp;	yidR	yidR	<i>yidR</i>&nbsp;&larr;	hypothetical protein	hypothetical protein	ECB_03572	snp_nonsynonymous	nonsynonymous	11330
3637	LTEE	Ara-1	50000	REL11330	A	point-mutator	SNP	3831367	3831367	725	3831367	A&rarr;C	<font class=snp_type_nonsynonymous>L242R</font>&nbsp;(C<font class=mutation_in_codon>T</font>G&rarr;C<font class=mutation_in_codon>G</font>G)&nbsp;	dgoT	dgoT	<i>dgoT</i>&nbsp;&larr;	D-galactonate transporter	D&#8209;galactonate transporter	ECB_03574	snp_nonsynonymous	nonsynonymous	11330
3638	LTEE	Ara-1	50000	REL11330	A	point-mutator	SNP	3848250	3848250	1062	3848250	A&rarr;C	<font class=snp_type_nonsynonymous>L354F</font>&nbsp;(TT<font class=mutation_in_codon>A</font>&rarr;TT<font class=mutation_in_codon>C</font>)&nbsp;	trmE	trmE	<i>trmE</i>&nbsp;&rarr;	tRNA modification GTPase	tRNA modification GTPase	ECB_03590	snp_nonsynonymous	nonsynonymous	11330
3639	LTEE	Ara-1	50000	REL11330	A	point-mutator	SNP	3855776	3855776	1195	3855776	A&rarr;C	<font class=snp_type_nonsynonymous>S399A</font>&nbsp;(<font class=mutation_in_codon>T</font>CG&rarr;<font class=mutation_in_codon>G</font>CG)&nbsp;	yieG	yieG	<i>yieG</i>&nbsp;&larr;	predicted inner membrane protein	predicted inner membrane protein	ECB_03598	snp_nonsynonymous	nonsynonymous	11330
3640	LTEE	Ara-1	50000	REL11330	A	point-mutator	SNP	3857359	3857359	223	3857359	T&rarr;G	<font class=snp_type_nonsynonymous>Y75D</font>&nbsp;(<font class=mutation_in_codon>T</font>AC&rarr;<font class=mutation_in_codon>G</font>AC)&nbsp;	yieH	yieH	<i>yieH</i>&nbsp;&rarr;	predicted hydrolase	predicted hydrolase	ECB_03599	snp_nonsynonymous	nonsynonymous	11330
3641	LTEE	Ara-1	50000	REL11330	A	point-mutator	SNP	3874739	3874739	828	3874739	A&rarr;C	<font class=snp_type_synonymous>T276T</font>&nbsp;(AC<font class=mutation_in_codon>T</font>&rarr;AC<font class=mutation_in_codon>G</font>)&nbsp;	glmU	glmU	<i>glmU</i>&nbsp;&larr;	bifunctional N-acetylglucosamine-1-phosphate uridyltransferase/glucosamine-1-phosphate acetyltransferase	bifunctional N&#8209;acetylglucosamine&#8209;1&#8209;phosphate uridyltransferase/glucosamine&#8209;1&#8209;phosphate acetyltransferase	ECB_03614	snp_synonymous	synonymous	11330
3642	LTEE	Ara-1	50000	REL11330	A	point-mutator	INS	3875632	3875632	intergenic (-66/+287)	3875632	(T)<sub>7&rarr;8</sub>	intergenic&nbsp;(&#8209;66/+287)	glmU,atpC	glmU/atpC	<i>glmU</i>&nbsp;&larr;&nbsp;/&nbsp;&larr;&nbsp;<i>atpC</i>	bifunctional N-acetylglucosamine-1-phosphate uridyltransferase/glucosamine-1-phosphate acetyltransferase/F0F1 ATP synthase subunit epsilon	bifunctional N&#8209;acetylglucosamine&#8209;1&#8209;phosphate uridyltransferase/glucosamine&#8209;1&#8209;phosphate acetyltransferase/F0F1 ATP synthase subunit epsilon	ECB_03614/ECB_03615	small_indel	not_snp	11330
3643	LTEE	Ara-1	50000	REL11330	A	point-mutator	SNP	3888652	3888652	1313	3888652	A&rarr;C	<font class=snp_type_nonsynonymous>L438R</font>&nbsp;(C<font class=mutation_in_codon>T</font>G&rarr;C<font class=mutation_in_codon>G</font>G)&nbsp;	yieM	yieM	<i>yieM</i>&nbsp;&larr;	predicted von Willibrand factor containing protein	predicted von Willibrand factor containing protein	ECB_03629	snp_nonsynonymous	nonsynonymous	11330
3644	LTEE	Ara-1	50000	REL11330	A	point-mutator	INS	3893551	3893551	intergenic (+6/-50)	3893551	+G	intergenic&nbsp;(+6/&#8209;50)	kup,insJ-5	kup/insJ-5	<i>kup</i>&nbsp;&rarr;&nbsp;/&nbsp;&rarr;&nbsp;<i>insJ&#8209;5</i>	potassium transporter/IS150 hypothetical protein	potassium transporter/IS150 hypothetical protein	ECB_03631/ECB_03632	small_indel	not_snp	11330
3645	LTEE	Ara-1	50000	REL11330	A	point-mutator	INS	3893551	3893551	intergenic (+6/-50)	3893551	+AG	intergenic&nbsp;(+6/&#8209;50)	kup,insJ-5	kup/insJ-5	<i>kup</i>&nbsp;&rarr;&nbsp;/&nbsp;&rarr;&nbsp;<i>insJ&#8209;5</i>	potassium transporter/IS150 hypothetical protein	potassium transporter/IS150 hypothetical protein	ECB_03631/ECB_03632	small_indel	not_snp	11330
3646	LTEE	Ara-1	50000	REL11330	A	point-mutator	DEL	3894998	3901931	NA	3894998	&Delta;6,934&nbsp;bp	IS<i>150</i>&#8209;mediated	rbsD,rbsA,rbsC,rbsB,rbsK,rbsR,[yieO]	rbsD–[yieO]	<i>rbsD</i>&#8211;<i>[yieO]</i>	rbsD, rbsA, rbsC, rbsB, rbsK, rbsR, [yieO]	<i>rbsD, rbsA, rbsC, rbsB, rbsK, rbsR, [yieO]</i>	[ECB_03634]–[ECB_03640]	large_deletion	not_snp	11330
3647	LTEE	Ara-1	50000	REL11330	A	point-mutator	SNP	3902663	3902663	472	3902663	T&rarr;G	<font class=snp_type_nonsynonymous>M158L</font>&nbsp;(<font class=mutation_in_codon>A</font>TG&rarr;<font class=mutation_in_codon>C</font>TG)&nbsp;	yieP	yieP	<i>yieP</i>&nbsp;&larr;	predicted transcriptional regulator	predicted transcriptional regulator	ECB_03641	snp_nonsynonymous	nonsynonymous	11330
3648	LTEE	Ara-1	50000	REL11330	A	point-mutator	SNP	3923571	3923571	1093	3923571	A&rarr;C	<font class=snp_type_nonsynonymous>N365H</font>&nbsp;(<font class=mutation_in_codon>A</font>AC&rarr;<font class=mutation_in_codon>C</font>AC)&nbsp;	rep	rep	<i>rep</i>&nbsp;&rarr;	DNA helicase and single-stranded DNA-dependent ATPase	DNA helicase and single&#8209;stranded DNA&#8209;dependent ATPase	ECB_03656	snp_nonsynonymous	nonsynonymous	11330
3649	LTEE	Ara-1	50000	REL11330	A	point-mutator	SNP	3924548	3924548	1484	3924548	T&rarr;G	<font class=snp_type_nonsynonymous>*495S</font>&nbsp;(T<font class=mutation_in_codon>A</font>A&rarr;T<font class=mutation_in_codon>C</font>A)&nbsp;	gppA	gppA	<i>gppA</i>&nbsp;&larr;	guanosine pentaphosphatase/exopolyphosphatase	guanosine pentaphosphatase/exopolyphosphatase	ECB_03657	snp_nonsynonymous	nonsynonymous	11330
3650	LTEE	Ara-1	50000	REL11330	A	point-mutator	SNP	3929494	3929494	intergenic (+18/-222)	3929494	A&rarr;C	intergenic&nbsp;(+18/&#8209;222)	rho,rfe	rho/rfe	<i>rho</i>&nbsp;&rarr;&nbsp;/&nbsp;&rarr;&nbsp;<i>rfe</i>	transcription termination factor Rho/UDP-GlcNAc:undecaprenylphosphate GlcNAc-1-phosphate transferase	transcription termination factor Rho/UDP&#8209;GlcNAc:undecaprenylphosphate GlcNAc&#8209;1&#8209;phosphate transferase	ECB_03661/ECB_03662	snp_intergenic	intergenic	11330
3651	LTEE	Ara-1	50000	REL11330	A	point-mutator	SNP	3934468	3934468	147	3934468	A&rarr;C	<font class=snp_type_nonsynonymous>Q49H</font>&nbsp;(CA<font class=mutation_in_codon>A</font>&rarr;CA<font class=mutation_in_codon>C</font>)&nbsp;	rffG	rffG	<i>rffG</i>&nbsp;&rarr;	dTDP-glucose 4,6-dehydratase	dTDP&#8209;glucose 4,6&#8209;dehydratase	ECB_03666	snp_nonsynonymous	nonsynonymous	11330
3652	LTEE	Ara-1	50000	REL11330	A	point-mutator	SNP	3938427	3938427	350	3938427	G&rarr;T	<font class=snp_type_nonsynonymous>G117V</font>&nbsp;(G<font class=mutation_in_codon>G</font>G&rarr;G<font class=mutation_in_codon>T</font>G)&nbsp;	wzxE	wzxE	<i>wzxE</i>&nbsp;&rarr;	O-antigen translocase	O&#8209;antigen translocase	ECB_03670	snp_nonsynonymous	nonsynonymous	11330
3653	LTEE	Ara-1	50000	REL11330	A	point-mutator	SNP	3939691	3939691	367	3939691	A&rarr;C	<font class=snp_type_nonsynonymous>K123Q</font>&nbsp;(<font class=mutation_in_codon>A</font>AG&rarr;<font class=mutation_in_codon>C</font>AG)&nbsp;	rffT	rffT	<i>rffT</i>&nbsp;&rarr;	4-alpha-L-fucosyltransferase	4&#8209;alpha&#8209;L&#8209;fucosyltransferase	ECB_03671	snp_nonsynonymous	nonsynonymous	11330
3654	LTEE	Ara-1	50000	REL11330	A	point-mutator	SNP	3945354	3945354	597	3945354	T&rarr;G	<font class=snp_type_nonsynonymous>I199M</font>&nbsp;(AT<font class=mutation_in_codon>T</font>&rarr;AT<font class=mutation_in_codon>G</font>)&nbsp;	aslB	aslB	<i>aslB</i>&nbsp;&rarr;	predicted regulator of arylsulfatase activity	predicted regulator of arylsulfatase activity	ECB_03675	snp_nonsynonymous	nonsynonymous	11330
3655	LTEE	Ara-1	50000	REL11330	A	point-mutator	SNP	3950156	3950156	741	3950156	T&rarr;G	<font class=snp_type_nonsynonymous>Q247H</font>&nbsp;(CA<font class=mutation_in_codon>A</font>&rarr;CA<font class=mutation_in_codon>C</font>)&nbsp;	hemX	hemX	<i>hemX</i>&nbsp;&larr;	predicted uroporphyrinogen III methylase	predicted uroporphyrinogen III methylase	ECB_03678	snp_nonsynonymous	nonsynonymous	11330
3656	LTEE	Ara-1	50000	REL11330	A	point-mutator	SNP	3954957	3954957	1975	3954957	T&rarr;G	<font class=snp_type_nonsynonymous>S659A</font>&nbsp;(<font class=mutation_in_codon>T</font>CT&rarr;<font class=mutation_in_codon>G</font>CT)&nbsp;	cyaA	cyaA	<i>cyaA</i>&nbsp;&rarr;	adenylate cyclase	adenylate cyclase	ECB_03681	snp_nonsynonymous	nonsynonymous	11330
3657	LTEE	Ara-1	50000	REL11330	A	point-mutator	SNP	3956032	3956032	intergenic (+125/-327)	3956032	T&rarr;G	intergenic&nbsp;(+125/&#8209;327)	yzcX,yifL	yzcX/yifL	<i>yzcX</i>&nbsp;&rarr;&nbsp;/&nbsp;&rarr;&nbsp;<i>yifL</i>	hypothetical protein/predicted lipoprotein	hypothetical protein/predicted lipoprotein	ECB_03683/ECB_03684	snp_intergenic	intergenic	11330
3658	LTEE	Ara-1	50000	REL11330	A	point-mutator	SNP	3957409	3957409	811	3957409	T&rarr;G	<font class=snp_type_nonsynonymous>F271V</font>&nbsp;(<font class=mutation_in_codon>T</font>TT&rarr;<font class=mutation_in_codon>G</font>TT)&nbsp;	dapF	dapF	<i>dapF</i>&nbsp;&rarr;	diaminopimelate epimerase	diaminopimelate epimerase	ECB_03685	snp_nonsynonymous	nonsynonymous	11330
3659	LTEE	Ara-1	50000	REL11330	A	point-mutator	SNP	3963863	3963863	intergenic (-77/-293)	3963863	T&rarr;G	intergenic&nbsp;(&#8209;77/&#8209;293)	yigE,corA	yigE/corA	<i>yigE</i>&nbsp;&larr;&nbsp;/&nbsp;&rarr;&nbsp;<i>corA</i>	hypothetical protein/magnesium/nickel/cobalt transporter	hypothetical protein/magnesium/nickel/cobalt transporter	ECB_03691/ECB_03692	snp_intergenic	intergenic	11330
3660	LTEE	Ara-1	50000	REL11330	A	point-mutator	SNP	3965377	3965377	194	3965377	A&rarr;C	<font class=snp_type_nonsynonymous>F65C</font>&nbsp;(T<font class=mutation_in_codon>T</font>C&rarr;T<font class=mutation_in_codon>G</font>C)&nbsp;	ECB_03693	ECB_03693	<i>ECB_03693</i>&nbsp;&larr;	conserved hypothetical protein	conserved hypothetical protein	ECB_03693	snp_nonsynonymous	nonsynonymous	11330
3661	LTEE	Ara-1	50000	REL11330	A	point-mutator	SNP	3966983	3966983	252	3966983	T&rarr;G	<font class=snp_type_synonymous>L84L</font>&nbsp;(CT<font class=mutation_in_codon>A</font>&rarr;CT<font class=mutation_in_codon>C</font>)&nbsp;	yigF	yigF	<i>yigF</i>&nbsp;&larr;	conserved inner membrane protein	conserved inner membrane protein	ECB_03696	snp_synonymous	synonymous	11330
3662	LTEE	Ara-1	50000	REL11330	A	point-mutator	SNP	3967850	3967850	764	3967850	A&rarr;C	<font class=snp_type_nonsynonymous>L255R</font>&nbsp;(C<font class=mutation_in_codon>T</font>G&rarr;C<font class=mutation_in_codon>G</font>G)&nbsp;	rarD	rarD	<i>rarD</i>&nbsp;&larr;	predicted chloramphenical resistance permease	predicted chloramphenical resistance permease	ECB_03698	snp_nonsynonymous	nonsynonymous	11330
3663	LTEE	Ara-1	50000	REL11330	A	point-mutator	SNP	3968103	3968103	511	3968103	T&rarr;G	<font class=snp_type_nonsynonymous>I171L</font>&nbsp;(<font class=mutation_in_codon>A</font>TT&rarr;<font class=mutation_in_codon>C</font>TT)&nbsp;	rarD	rarD	<i>rarD</i>&nbsp;&larr;	predicted chloramphenical resistance permease	predicted chloramphenical resistance permease	ECB_03698	snp_nonsynonymous	nonsynonymous	11330
3664	LTEE	Ara-1	50000	REL11330	A	point-mutator	SNP	3968878	3968878	255	3968878	T&rarr;G	<font class=snp_type_nonsynonymous>E85D</font>&nbsp;(GA<font class=mutation_in_codon>A</font>&rarr;GA<font class=mutation_in_codon>C</font>)&nbsp;	yigI	yigI	<i>yigI</i>&nbsp;&larr;	hypothetical protein	hypothetical protein	ECB_03699	snp_nonsynonymous	nonsynonymous	11330
3665	LTEE	Ara-1	50000	REL11330	A	point-mutator	SNP	3970954	3970954	670	3970954	A&rarr;C	<font class=snp_type_nonsynonymous>K224Q</font>&nbsp;(<font class=mutation_in_codon>A</font>AA&rarr;<font class=mutation_in_codon>C</font>AA)&nbsp;	recQ	recQ	<i>recQ</i>&nbsp;&rarr;	ATP-dependent DNA helicase	ATP&#8209;dependent DNA helicase	ECB_03701	snp_nonsynonymous	nonsynonymous	11330
3666	LTEE	Ara-1	50000	REL11330	A	point-mutator	SNP	3972370	3972370	187	3972370	A&rarr;C	<font class=snp_type_nonsynonymous>I63L</font>&nbsp;(<font class=mutation_in_codon>A</font>TT&rarr;<font class=mutation_in_codon>C</font>TT)&nbsp;	rhtC	rhtC	<i>rhtC</i>&nbsp;&rarr;	threonine efflux system	threonine efflux system	ECB_03702	snp_nonsynonymous	nonsynonymous	11330
3667	LTEE	Ara-1	50000	REL11330	A	point-mutator	SNP	3985016	3985016	1378	3985016	T&rarr;G	<font class=snp_type_nonsynonymous>N460H</font>&nbsp;(<font class=mutation_in_codon>A</font>AT&rarr;<font class=mutation_in_codon>C</font>AT)&nbsp;	ECB_03714	ECB_03714	<i>ECB_03714</i>&nbsp;&larr;	conserved hypothetical protein	conserved hypothetical protein	ECB_03714	snp_nonsynonymous	nonsynonymous	11330
3668	LTEE	Ara-1	50000	REL11330	A	point-mutator	SNP	3985191	3985191	1203	3985191	A&rarr;C	<font class=snp_type_nonsynonymous>D401E</font>&nbsp;(GA<font class=mutation_in_codon>T</font>&rarr;GA<font class=mutation_in_codon>G</font>)&nbsp;	ECB_03714	ECB_03714	<i>ECB_03714</i>&nbsp;&larr;	conserved hypothetical protein	conserved hypothetical protein	ECB_03714	snp_nonsynonymous	nonsynonymous	11330
3669	LTEE	Ara-1	50000	REL11330	A	point-mutator	SNP	3991051	3991051	588	3991051	A&rarr;C	<font class=snp_type_synonymous>G196G</font>&nbsp;(GG<font class=mutation_in_codon>T</font>&rarr;GG<font class=mutation_in_codon>G</font>)&nbsp;	ECB_03719	ECB_03719	<i>ECB_03719</i>&nbsp;&larr;	conserved hypothetical protein	conserved hypothetical protein	ECB_03719	snp_synonymous	synonymous	11330
3670	LTEE	Ara-1	50000	REL11330	A	point-mutator	SNP	3992033	3992033	128	3992033	A&rarr;C	<font class=snp_type_nonsynonymous>F43C</font>&nbsp;(T<font class=mutation_in_codon>T</font>T&rarr;T<font class=mutation_in_codon>G</font>T)&nbsp;	ECB_03720	ECB_03720	<i>ECB_03720</i>&nbsp;&larr;	conserved hypothetical protein	conserved hypothetical protein	ECB_03720	snp_nonsynonymous	nonsynonymous	11330
3671	LTEE	Ara-1	50000	REL11330	A	point-mutator	SNP	3994424	3994424	373	3994424	T&rarr;G	<font class=snp_type_nonsynonymous>M125L</font>&nbsp;(<font class=mutation_in_codon>A</font>TG&rarr;<font class=mutation_in_codon>C</font>TG)&nbsp;	ECB_03723	ECB_03723	<i>ECB_03723</i>&nbsp;&larr;	putative conserved protein	putative conserved protein	ECB_03723	snp_nonsynonymous	nonsynonymous	11330
3672	LTEE	Ara-1	50000	REL11330	A	point-mutator	SNP	3995913	3995913	110	3995913	A&rarr;C	<font class=snp_type_nonsynonymous>E37A</font>&nbsp;(G<font class=mutation_in_codon>A</font>A&rarr;G<font class=mutation_in_codon>C</font>A)&nbsp;	yigN	yigN	<i>yigN</i>&nbsp;&rarr;	predicted recombination limiting protein	predicted recombination limiting protein	ECB_03725	snp_nonsynonymous	nonsynonymous	11330
3673	LTEE	Ara-1	50000	REL11330	A	point-mutator	SNP	3998776	3998776	80	3998776	A&rarr;C	<font class=snp_type_nonsynonymous>K27T</font>&nbsp;(A<font class=mutation_in_codon>A</font>A&rarr;A<font class=mutation_in_codon>C</font>A)&nbsp;	ubiB	ubiB	<i>ubiB</i>&nbsp;&rarr;	putative ubiquinone biosynthesis protein UbiB	putative ubiquinone biosynthesis protein UbiB	ECB_03728	snp_nonsynonymous	nonsynonymous	11330
3674	LTEE	Ara-1	50000	REL11330	A	point-mutator	SNP	3999534	3999534	838	3999534	T&rarr;G	<font class=snp_type_nonsynonymous>F280V</font>&nbsp;(<font class=mutation_in_codon>T</font>TC&rarr;<font class=mutation_in_codon>G</font>TC)&nbsp;	ubiB	ubiB	<i>ubiB</i>&nbsp;&rarr;	putative ubiquinone biosynthesis protein UbiB	putative ubiquinone biosynthesis protein UbiB	ECB_03728	snp_nonsynonymous	nonsynonymous	11330
3675	LTEE	Ara-1	50000	REL11330	A	point-mutator	SNP	4004754	4004754	1296	4004754	T&rarr;G	<font class=snp_type_nonsynonymous>N432K</font>&nbsp;(AA<font class=mutation_in_codon>T</font>&rarr;AA<font class=mutation_in_codon>G</font>)&nbsp;	ubiD	ubiD	<i>ubiD</i>&nbsp;&rarr;	3-octaprenyl-4-hydroxybenzoate decarboxylase	3&#8209;octaprenyl&#8209;4&#8209;hydroxybenzoate decarboxylase	ECB_03734	snp_nonsynonymous	nonsynonymous	11330
3676	LTEE	Ara-1	50000	REL11330	A	point-mutator	SNP	4011464	4011464	600	4011464	A&rarr;C	<font class=snp_type_nonsynonymous>L200F</font>&nbsp;(TT<font class=mutation_in_codon>A</font>&rarr;TT<font class=mutation_in_codon>C</font>)&nbsp;	yigZ	yigZ	<i>yigZ</i>&nbsp;&rarr;	predicted elongation factor	predicted elongation factor	ECB_03739	snp_nonsynonymous	nonsynonymous	11330
3677	LTEE	Ara-1	50000	REL11330	A	point-mutator	SNP	4019649	4019649	67	4019649	T&rarr;G	<font class=snp_type_nonsynonymous>I23L</font>&nbsp;(<font class=mutation_in_codon>A</font>TC&rarr;<font class=mutation_in_codon>C</font>TC)&nbsp;	mobB	mobB	<i>mobB</i>&nbsp;&larr;	molybdopterin-guanine dinucleotide biosynthesis protein B	molybdopterin&#8209;guanine dinucleotide biosynthesis protein B	ECB_03742	snp_nonsynonymous	nonsynonymous	11330
3678	LTEE	Ara-1	50000	REL11330	A	point-mutator	SNP	4024547	4024547	353	4024547	T&rarr;G	<font class=snp_type_nonsynonymous>K118T</font>&nbsp;(A<font class=mutation_in_codon>A</font>G&rarr;A<font class=mutation_in_codon>C</font>G)&nbsp;	yihG	yihG	<i>yihG</i>&nbsp;&larr;	predicted endonuclease	predicted endonuclease	ECB_03748	snp_nonsynonymous	nonsynonymous	11330
3679	LTEE	Ara-1	50000	REL11330	A	point-mutator	SNP	4027844	4027844	2582	4027844	T&rarr;G	<font class=snp_type_nonsynonymous>I861S</font>&nbsp;(A<font class=mutation_in_codon>T</font>T&rarr;A<font class=mutation_in_codon>G</font>T)&nbsp;	polA	polA	<i>polA</i>&nbsp;&rarr;	DNA polymerase I	DNA polymerase I	ECB_03749	snp_nonsynonymous	nonsynonymous	11330
3680	LTEE	Ara-1	50000	REL11330	A	point-mutator	SNP	4030951	4030951	610	4030951	A&rarr;C	<font class=snp_type_nonsynonymous>T204P</font>&nbsp;(<font class=mutation_in_codon>A</font>CC&rarr;<font class=mutation_in_codon>C</font>CC)&nbsp;	hemN	hemN	<i>hemN</i>&nbsp;&rarr;	coproporphyrinogen III oxidase	coproporphyrinogen III oxidase	ECB_03752	snp_nonsynonymous	nonsynonymous	11330
3681	LTEE	Ara-1	50000	REL11330	A	point-mutator	SNP	4033030	4033030	507	4033030	T&rarr;G	<font class=snp_type_nonsynonymous>E169D</font>&nbsp;(GA<font class=mutation_in_codon>A</font>&rarr;GA<font class=mutation_in_codon>C</font>)&nbsp;	glnG	glnG	<i>glnG</i>&nbsp;&larr;	fused DNA-binding response regulator in two-component regulatory system with GlnL: response regulator/sigma54 interaction protein	fused DNA&#8209;binding response regulator in two&#8209;component regulatory system with GlnL: response regulator/sigma54 interaction protein	ECB_03753	snp_nonsynonymous	nonsynonymous	11330
3682	LTEE	Ara-1	50000	REL11330	A	point-mutator	SNP	4040455	4040455	intergenic (+52/-50)	4040455	T&rarr;G	intergenic&nbsp;(+52/&#8209;50)	yihM,yihN	yihM/yihN	<i>yihM</i>&nbsp;&rarr;&nbsp;/&nbsp;&rarr;&nbsp;<i>yihN</i>	predicted sugar phosphate isomerase/predicted transporter	predicted sugar phosphate isomerase/predicted transporter	ECB_03758/ECB_03759	snp_intergenic	intergenic	11330
3683	LTEE	Ara-1	50000	REL11330	A	point-mutator	SNP	4046297	4046297	1201	4046297	T&rarr;G	<font class=snp_type_nonsynonymous>T401P</font>&nbsp;(<font class=mutation_in_codon>A</font>CC&rarr;<font class=mutation_in_codon>C</font>CC)&nbsp;	yihQ	yihQ	<i>yihQ</i>&nbsp;&larr;	alpha-glucosidase	alpha&#8209;glucosidase	ECB_03763	snp_nonsynonymous	nonsynonymous	11330
3684	LTEE	Ara-1	50000	REL11330	A	point-mutator	SNP	4048043	4048043	506	4048043	T&rarr;G	<font class=snp_type_nonsynonymous>H169P</font>&nbsp;(C<font class=mutation_in_codon>A</font>T&rarr;C<font class=mutation_in_codon>C</font>T)&nbsp;	yihR	yihR	<i>yihR</i>&nbsp;&larr;	predicted aldose-1-epimerase	predicted aldose&#8209;1&#8209;epimerase	ECB_03764	snp_nonsynonymous	nonsynonymous	11330
3685	LTEE	Ara-1	50000	REL11330	A	point-mutator	SNP	4048871	4048871	1033	4048871	A&rarr;C	<font class=snp_type_nonsynonymous>W345G</font>&nbsp;(<font class=mutation_in_codon>T</font>GG&rarr;<font class=mutation_in_codon>G</font>GG)&nbsp;	yihS	yihS	<i>yihS</i>&nbsp;&larr;	predicted glucosamine isomerase	predicted glucosamine isomerase	ECB_03765	snp_nonsynonymous	nonsynonymous	11330
3686	LTEE	Ara-1	50000	REL11330	A	point-mutator	SNP	4058150	4058150	intergenic (+34/+296)	4058150	A&rarr;C	intergenic&nbsp;(+34/+296)	yiiF,fdhE	yiiF/fdhE	<i>yiiF</i>&nbsp;&rarr;&nbsp;/&nbsp;&larr;&nbsp;<i>fdhE</i>	hypothetical protein/formate dehydrogenase accessory protein FdhE	hypothetical protein/formate dehydrogenase accessory protein FdhE	ECB_03775/ECB_03776	snp_intergenic	intergenic	11330
3687	LTEE	Ara-1	50000	REL11330	A	point-mutator	SNP	4062272	4062272	1698	4062272	T&rarr;G	<font class=snp_type_nonsynonymous>K566N</font>&nbsp;(AA<font class=mutation_in_codon>A</font>&rarr;AA<font class=mutation_in_codon>C</font>)&nbsp;	fdoG	fdoG	<i>fdoG</i>&nbsp;&larr;	formate dehydrogenase-O, major subunit	formate dehydrogenase&#8209;O, major subunit	ECB_03779	snp_nonsynonymous	nonsynonymous	11330
3688	LTEE	Ara-1	50000	REL11330	A	point-mutator	SNP	4067365	4067365	638	4067365	T&rarr;G	<font class=snp_type_nonsynonymous>E213A</font>&nbsp;(G<font class=mutation_in_codon>A</font>G&rarr;G<font class=mutation_in_codon>C</font>G)&nbsp;	frvR	frvR	<i>frvR</i>&nbsp;&larr;	predicted regulator	predicted regulator	ECB_03782	snp_nonsynonymous	nonsynonymous	11330
3689	LTEE	Ara-1	50000	REL11330	A	point-mutator	SNP	4070289	4070289	225	4070289	A&rarr;C	<font class=snp_type_nonsynonymous>D75E</font>&nbsp;(GA<font class=mutation_in_codon>T</font>&rarr;GA<font class=mutation_in_codon>G</font>)&nbsp;	frvB	frvB	<i>frvB</i>&nbsp;&larr;	fused predicted PTS enzymes: IIB component/IIC component	fused predicted PTS enzymes: IIB component/IIC component	ECB_03784	snp_nonsynonymous	nonsynonymous	11330
3690	LTEE	Ara-1	50000	REL11330	A	point-mutator	SNP	4070711	4070711	260	4070711	T&rarr;G	<font class=snp_type_nonsynonymous>K87T</font>&nbsp;(A<font class=mutation_in_codon>A</font>A&rarr;A<font class=mutation_in_codon>C</font>A)&nbsp;	frvA	frvA	<i>frvA</i>&nbsp;&larr;	predicted enzyme IIA component of PTS	predicted enzyme IIA component of PTS	ECB_03785	snp_nonsynonymous	nonsynonymous	11330
3691	LTEE	Ara-1	50000	REL11330	A	point-mutator	SNP	4072208	4072208	762	4072208	T&rarr;G	<font class=snp_type_nonsynonymous>F254L</font>&nbsp;(TT<font class=mutation_in_codon>T</font>&rarr;TT<font class=mutation_in_codon>G</font>)&nbsp;	ECB_03786	ECB_03786	<i>ECB_03786</i>&nbsp;&rarr;	putative glycoporin	putative glycoporin	ECB_03786	snp_nonsynonymous	nonsynonymous	11330
3692	LTEE	Ara-1	50000	REL11330	A	point-mutator	SNP	4073894	4073894	137	4073894	T&rarr;G	<font class=snp_type_nonsynonymous>K46T</font>&nbsp;(A<font class=mutation_in_codon>A</font>A&rarr;A<font class=mutation_in_codon>C</font>A)&nbsp;	rhaD	rhaD	<i>rhaD</i>&nbsp;&larr;	rhamnulose-1-phosphate aldolase	rhamnulose&#8209;1&#8209;phosphate aldolase	ECB_03788	snp_nonsynonymous	nonsynonymous	11330
3693	LTEE	Ara-1	50000	REL11330	A	point-mutator	SNP	4073906	4073906	125	4073906	A&rarr;C	<font class=snp_type_nonsynonymous>I42S</font>&nbsp;(A<font class=mutation_in_codon>T</font>C&rarr;A<font class=mutation_in_codon>G</font>C)&nbsp;	rhaD	rhaD	<i>rhaD</i>&nbsp;&larr;	rhamnulose-1-phosphate aldolase	rhamnulose&#8209;1&#8209;phosphate aldolase	ECB_03788	snp_nonsynonymous	nonsynonymous	11330
3694	LTEE	Ara-1	50000	REL11330	A	point-mutator	SNP	4081115	4081115	intergenic (+203/-57)	4081115	A&rarr;C	intergenic&nbsp;(+203/&#8209;57)	sodA,kdgT	sodA/kdgT	<i>sodA</i>&nbsp;&rarr;&nbsp;/&nbsp;&rarr;&nbsp;<i>kdgT</i>	superoxide dismutase, Mn/2-keto-3-deoxygluconate permease	superoxide dismutase, Mn/2&#8209;keto&#8209;3&#8209;deoxygluconate permease	ECB_03794/ECB_03795	snp_intergenic	intergenic	11330
3695	LTEE	Ara-1	50000	REL11330	A	point-mutator	SNP	4082874	4082874	571	4082874	T&rarr;G	<font class=snp_type_nonsynonymous>L191V</font>&nbsp;(<font class=mutation_in_codon>T</font>TA&rarr;<font class=mutation_in_codon>G</font>TA)&nbsp;	yiiM	yiiM	<i>yiiM</i>&nbsp;&rarr;	hypothetical protein	hypothetical protein	ECB_03796	snp_nonsynonymous	nonsynonymous	11330
3696	LTEE	Ara-1	50000	REL11330	A	point-mutator	SNP	4087820	4087820	787	4087820	A&rarr;C	<font class=snp_type_nonsynonymous>I263L</font>&nbsp;(<font class=mutation_in_codon>A</font>TT&rarr;<font class=mutation_in_codon>C</font>TT)&nbsp;	pfkA	pfkA	<i>pfkA</i>&nbsp;&rarr;	6-phosphofructokinase	6&#8209;phosphofructokinase	ECB_03801	snp_nonsynonymous	nonsynonymous	11330
3697	LTEE	Ara-1	50000	REL11330	A	point-mutator	SNP	4089838	4089838	427	4089838	A&rarr;C	<font class=snp_type_nonsynonymous>I143L</font>&nbsp;(<font class=mutation_in_codon>A</font>TC&rarr;<font class=mutation_in_codon>C</font>TC)&nbsp;	cdh	cdh	<i>cdh</i>&nbsp;&rarr;	CDP-diacylglycerol pyrophosphatase	CDP&#8209;diacylglycerol pyrophosphatase	ECB_03803	snp_nonsynonymous	nonsynonymous	11330
3698	LTEE	Ara-1	50000	REL11330	A	point-mutator	SNP	4099603	4099603	230	4099603	T&rarr;G	<font class=snp_type_nonsynonymous>D77A</font>&nbsp;(G<font class=mutation_in_codon>A</font>C&rarr;G<font class=mutation_in_codon>C</font>C)&nbsp;	menA	menA	<i>menA</i>&nbsp;&larr;	1,4-dihydroxy-2-naphthoate octaprenyltransferase	1,4&#8209;dihydroxy&#8209;2&#8209;naphthoate octaprenyltransferase	ECB_03815	snp_nonsynonymous	nonsynonymous	11330
3699	LTEE	Ara-1	50000	REL11330	A	point-mutator	SNP	4100655	4100655	576	4100655	C&rarr;T	<font class=snp_type_nonsynonymous>M192I</font>&nbsp;(AT<font class=mutation_in_codon>G</font>&rarr;AT<font class=mutation_in_codon>A</font>)&nbsp;	hslU	hslU	<i>hslU</i>&nbsp;&larr;	ATP-dependent protease ATP-binding subunit	ATP&#8209;dependent protease ATP&#8209;binding subunit	ECB_03816	snp_nonsynonymous	nonsynonymous	11330
3700	LTEE	Ara-1	50000	REL11330	A	point-mutator	SNP	4102718	4102718	105	4102718	A&rarr;C	<font class=snp_type_synonymous>A35A</font>&nbsp;(GC<font class=mutation_in_codon>T</font>&rarr;GC<font class=mutation_in_codon>G</font>)&nbsp;	ftsN	ftsN	<i>ftsN</i>&nbsp;&larr;	essential cell division protein	essential cell division protein	ECB_03818	snp_synonymous	synonymous	11330
3701	LTEE	Ara-1	50000	REL11330	A	point-mutator	SNP	4119884	4119884	2445	4119884	A&rarr;C	<font class=snp_type_synonymous>V815V</font>&nbsp;(GT<font class=mutation_in_codon>T</font>&rarr;GT<font class=mutation_in_codon>G</font>)&nbsp;	ptsA	ptsA	<i>ptsA</i>&nbsp;&larr;	fused predicted PTS enzymes: Hpr component/enzyme I component/enzyme IIA component	fused predicted PTS enzymes: Hpr component/enzyme I component/enzyme IIA component	ECB_03833	snp_synonymous	synonymous	11330
3702	LTEE	Ara-1	50000	REL11330	A	point-mutator	SNP	4121449	4121449	880	4121449	T&rarr;G	<font class=snp_type_nonsynonymous>K294Q</font>&nbsp;(<font class=mutation_in_codon>A</font>AA&rarr;<font class=mutation_in_codon>C</font>AA)&nbsp;	ptsA	ptsA	<i>ptsA</i>&nbsp;&larr;	fused predicted PTS enzymes: Hpr component/enzyme I component/enzyme IIA component	fused predicted PTS enzymes: Hpr component/enzyme I component/enzyme IIA component	ECB_03833	snp_nonsynonymous	nonsynonymous	11330
3703	LTEE	Ara-1	50000	REL11330	A	point-mutator	SNP	4124667	4124667	566	4124667	A&rarr;C	<font class=snp_type_nonsynonymous>Y189S</font>&nbsp;(T<font class=mutation_in_codon>A</font>T&rarr;T<font class=mutation_in_codon>C</font>T)&nbsp;	pflD	pflD	<i>pflD</i>&nbsp;&rarr;	predicted formate acetyltransferase 2 (pyruvate formate lyase II)	predicted formate acetyltransferase 2 (pyruvate formate lyase II)	ECB_03836	snp_nonsynonymous	nonsynonymous	11330
3704	LTEE	Ara-1	50000	REL11330	A	point-mutator	SNP	4125877	4125877	1776	4125877	A&rarr;C	<font class=snp_type_nonsynonymous>E592D</font>&nbsp;(GA<font class=mutation_in_codon>A</font>&rarr;GA<font class=mutation_in_codon>C</font>)&nbsp;	pflD	pflD	<i>pflD</i>&nbsp;&rarr;	predicted formate acetyltransferase 2 (pyruvate formate lyase II)	predicted formate acetyltransferase 2 (pyruvate formate lyase II)	ECB_03836	snp_nonsynonymous	nonsynonymous	11330
3705	LTEE	Ara-1	50000	REL11330	A	point-mutator	SNP	4126352	4126352	2251	4126352	A&rarr;C	<font class=snp_type_nonsynonymous>K751Q</font>&nbsp;(<font class=mutation_in_codon>A</font>AG&rarr;<font class=mutation_in_codon>C</font>AG)&nbsp;	pflD	pflD	<i>pflD</i>&nbsp;&rarr;	predicted formate acetyltransferase 2 (pyruvate formate lyase II)	predicted formate acetyltransferase 2 (pyruvate formate lyase II)	ECB_03836	snp_nonsynonymous	nonsynonymous	11330
3706	LTEE	Ara-1	50000	REL11330	A	point-mutator	DEL	4126706	4126706	coding (342/879 nt)	4126706	(T)<sub>8&rarr;7</sub>	coding&nbsp;(342/879&nbsp;nt)	pflC	pflC	<i>pflC</i>&nbsp;&rarr;	pyruvate formate lyase II activase	pyruvate formate lyase II activase	ECB_03837	small_indel	not_snp	11330
3707	LTEE	Ara-1	50000	REL11330	A	point-mutator	SNP	4131804	4131804	1402	4131804	A&rarr;C	<font class=snp_type_nonsynonymous>S468A</font>&nbsp;(<font class=mutation_in_codon>T</font>CC&rarr;<font class=mutation_in_codon>G</font>CC)&nbsp;	ppc	ppc	<i>ppc</i>&nbsp;&larr;	phosphoenolpyruvate carboxylase	phosphoenolpyruvate carboxylase	ECB_03841	snp_nonsynonymous	nonsynonymous	11330
3708	LTEE	Ara-1	50000	REL11330	A	point-mutator	SNP	4138571	4138571	221	4138571	A&rarr;C	<font class=snp_type_nonsynonymous>E74A</font>&nbsp;(G<font class=mutation_in_codon>A</font>G&rarr;G<font class=mutation_in_codon>C</font>G)&nbsp;	oxyR	oxyR	<i>oxyR</i>&nbsp;&rarr;	DNA-binding transcriptional dual regulator	DNA&#8209;binding transcriptional dual regulator	ECB_03846	snp_nonsynonymous	nonsynonymous	11330
3709	LTEE	Ara-1	50000	REL11330	A	point-mutator	SNP	4140780	4140780	intergenic (-129/-148)	4140780	T&rarr;G	intergenic&nbsp;(&#8209;129/&#8209;148)	udhA,yijC	udhA/yijC	<i>udhA</i>&nbsp;&larr;&nbsp;/&nbsp;&rarr;&nbsp;<i>yijC</i>	soluble pyridine nucleotide transhydrogenase/DNA-binding transcriptional repressor	soluble pyridine nucleotide transhydrogenase/DNA&#8209;binding transcriptional repressor	ECB_03847/ECB_03848	snp_intergenic	intergenic	11330
3710	LTEE	Ara-1	50000	REL11330	A	point-mutator	SNP	4143491	4143491	intergenic (-360/-9)	4143491	T&rarr;G	intergenic&nbsp;(&#8209;360/&#8209;9)	trmA,btuB	trmA/btuB	<i>trmA</i>&nbsp;&larr;&nbsp;/&nbsp;&rarr;&nbsp;<i>btuB</i>	tRNA (uracil-5-)-methyltransferase/vitamin B12/cobalamin outer membrane transporter	tRNA (uracil&#8209;5&#8209;)&#8209;methyltransferase/vitamin B12/cobalamin outer membrane transporter	ECB_03850/ECB_03851	snp_intergenic	intergenic	11330
3711	LTEE	Ara-1	50000	REL11330	A	point-mutator	SNP	4152114	4152114	447	4152114	A&rarr;C	<font class=snp_type_nonsynonymous>L149F</font>&nbsp;(TT<font class=mutation_in_codon>A</font>&rarr;TT<font class=mutation_in_codon>C</font>)&nbsp;	murB	murB	<i>murB</i>&nbsp;&rarr;	UDP-N-acetylenolpyruvoylglucosamine reductase	UDP&#8209;N&#8209;acetylenolpyruvoylglucosamine reductase	ECB_03853	snp_nonsynonymous	nonsynonymous	11330
3712	LTEE	Ara-1	50000	REL11330	A	point-mutator	SNP	4152633	4152633	966	4152633	T&rarr;G	<font class=snp_type_synonymous>L322L</font>&nbsp;(CT<font class=mutation_in_codon>T</font>&rarr;CT<font class=mutation_in_codon>G</font>)&nbsp;	murB	murB	<i>murB</i>&nbsp;&rarr;	UDP-N-acetylenolpyruvoylglucosamine reductase	UDP&#8209;N&#8209;acetylenolpyruvoylglucosamine reductase	ECB_03853	snp_synonymous	synonymous	11330
3713	LTEE	Ara-1	50000	REL11330	A	point-mutator	SNP	4156805	4156805	intergenic (+66/-164)	4156805	T&rarr;G	intergenic&nbsp;(+66/&#8209;164)	tuf,secE	tuf/secE	<i>tuf</i>&nbsp;&rarr;&nbsp;/&nbsp;&rarr;&nbsp;<i>secE</i>	protein chain elongation factor EF-Tu (duplicate of tufA)/translocase	protein chain elongation factor EF&#8209;Tu (duplicate of tufA)/translocase	ECB_03856/ECB_03857	snp_intergenic	intergenic	11330
3714	LTEE	Ara-1	50000	REL11330	A	point-mutator	SNP	4157158	4157158	190	4157158	A&rarr;C	<font class=snp_type_nonsynonymous>K64Q</font>&nbsp;(<font class=mutation_in_codon>A</font>AA&rarr;<font class=mutation_in_codon>C</font>AA)&nbsp;	secE	secE	<i>secE</i>&nbsp;&rarr;	translocase	translocase	ECB_03857	snp_nonsynonymous	nonsynonymous	11330
3715	LTEE	Ara-1	50000	REL11330	A	point-mutator	SNP	4158399	4158399	342	4158399	T&rarr;G	<font class=snp_type_synonymous>A114A</font>&nbsp;(GC<font class=mutation_in_codon>T</font>&rarr;GC<font class=mutation_in_codon>G</font>)&nbsp;	rplK	rplK	<i>rplK</i>&nbsp;&rarr;	50S ribosomal protein L11	50S ribosomal protein L11	ECB_03859	snp_synonymous	synonymous	11330
3716	LTEE	Ara-1	50000	REL11330	A	point-mutator	SNP	4163060	4163060	2205	4163060	A&rarr;C	<font class=snp_type_nonsynonymous>K735N</font>&nbsp;(AA<font class=mutation_in_codon>A</font>&rarr;AA<font class=mutation_in_codon>C</font>)&nbsp;	rpoB	rpoB	<i>rpoB</i>&nbsp;&rarr;	DNA-directed RNA polymerase subunit beta	DNA&#8209;directed RNA polymerase subunit beta	ECB_03863	snp_nonsynonymous	nonsynonymous	11330
3717	LTEE	Ara-1	50000	REL11330	A	point-mutator	SNP	4163173	4163173	2318	4163173	T&rarr;G	<font class=snp_type_nonsynonymous>L773R</font>&nbsp;(C<font class=mutation_in_codon>T</font>G&rarr;C<font class=mutation_in_codon>G</font>G)&nbsp;	rpoB	rpoB	<i>rpoB</i>&nbsp;&rarr;	DNA-directed RNA polymerase subunit beta	DNA&#8209;directed RNA polymerase subunit beta	ECB_03863	snp_nonsynonymous	nonsynonymous	11330
3718	LTEE	Ara-1	50000	REL11330	A	point-mutator	SNP	4172088	4172088	159	4172088	A&rarr;C	<font class=snp_type_synonymous>A53A</font>&nbsp;(GC<font class=mutation_in_codon>T</font>&rarr;GC<font class=mutation_in_codon>G</font>)&nbsp;	thiG	thiG	<i>thiG</i>&nbsp;&larr;	thiazole synthase	thiazole synthase	ECB_03867	snp_synonymous	synonymous	11330
3719	LTEE	Ara-1	50000	REL11330	A	point-mutator	SNP	4175612	4175612	99	4175612	A&rarr;C	<font class=snp_type_nonsynonymous>I33M</font>&nbsp;(AT<font class=mutation_in_codon>T</font>&rarr;AT<font class=mutation_in_codon>G</font>)&nbsp;	thiC	thiC	<i>thiC</i>&nbsp;&larr;	thiamine biosynthesis protein ThiC	thiamine biosynthesis protein ThiC	ECB_03871	snp_nonsynonymous	nonsynonymous	11330
3720	LTEE	Ara-1	50000	REL11330	A	point-mutator	SNP	4178224	4178224	897	4178224	T&rarr;G	<font class=snp_type_synonymous>A299A</font>&nbsp;(GC<font class=mutation_in_codon>T</font>&rarr;GC<font class=mutation_in_codon>G</font>)&nbsp;	hemE	hemE	<i>hemE</i>&nbsp;&rarr;	uroporphyrinogen decarboxylase	uroporphyrinogen decarboxylase	ECB_03874	snp_synonymous	synonymous	11330
3721	LTEE	Ara-1	50000	REL11330	A	point-mutator	SNP	4178271	4178271	944	4178271	T&rarr;G	<font class=snp_type_nonsynonymous>F315C</font>&nbsp;(T<font class=mutation_in_codon>T</font>C&rarr;T<font class=mutation_in_codon>G</font>C)&nbsp;	hemE	hemE	<i>hemE</i>&nbsp;&rarr;	uroporphyrinogen decarboxylase	uroporphyrinogen decarboxylase	ECB_03874	snp_nonsynonymous	nonsynonymous	11330
3722	LTEE	Ara-1	50000	REL11330	A	point-mutator	SNP	4179222	4179222	107	4179222	T&rarr;G	<font class=snp_type_nonsynonymous>F36C</font>&nbsp;(T<font class=mutation_in_codon>T</font>C&rarr;T<font class=mutation_in_codon>G</font>C)&nbsp;	yjaG	yjaG	<i>yjaG</i>&nbsp;&rarr;	hypothetical protein	hypothetical protein	ECB_03876	snp_nonsynonymous	nonsynonymous	11330
3723	LTEE	Ara-1	50000	REL11330	A	point-mutator	DEL	4180211	4180211	coding (34/696 nt)	4180211	&Delta;1&nbsp;bp	coding&nbsp;(34/696&nbsp;nt)	yjaH	yjaH	<i>yjaH</i>&nbsp;&rarr;	hypothetical protein	hypothetical protein	ECB_03878	small_indel	not_snp	11330
3724	LTEE	Ara-1	50000	REL11330	A	point-mutator	SNP	4184130	4184130	1226	4184130	T&rarr;G	<font class=snp_type_nonsynonymous>V409G</font>&nbsp;(G<font class=mutation_in_codon>T</font>G&rarr;G<font class=mutation_in_codon>G</font>G)&nbsp;	zraR	zraR	<i>zraR</i>&nbsp;&rarr;	fused DNA-binding response regulator in two-component regulatory system with ZraS: response regulator/sigma54 interaction protein	fused DNA&#8209;binding response regulator in two&#8209;component regulatory system with ZraS: response regulator/sigma54 interaction protein	ECB_03881	snp_nonsynonymous	nonsynonymous	11330
3725	LTEE	Ara-1	50000	REL11330	A	point-mutator	SNP	4193059	4193059	intergenic (+227/+66)	4193059	T&rarr;G	intergenic&nbsp;(+227/+66)	rrfE,yjaB	rrfE/yjaB	<i>rrfE</i>&nbsp;&rarr;&nbsp;/&nbsp;&larr;&nbsp;<i>yjaB</i>	5S ribosomal RNA/predicted acetyltransferase	5S ribosomal RNA/predicted acetyltransferase	ECB_r00022/ECB_03884	snp_intergenic	intergenic	11330
3726	LTEE	Ara-1	50000	REL11330	A	point-mutator	SNP	4195681	4195681	759	4195681	C&rarr;A	<font class=snp_type_synonymous>P253P</font>&nbsp;(CC<font class=mutation_in_codon>C</font>&rarr;CC<font class=mutation_in_codon>A</font>)&nbsp;	aceB	aceB	<i>aceB</i>&nbsp;&rarr;	malate synthase	malate synthase	ECB_03886	snp_synonymous	synonymous	11330
3727	LTEE	Ara-1	50000	REL11330	A	point-mutator	SNP	4196615	4196615	62	4196615	A&rarr;C	<font class=snp_type_nonsynonymous>E21A</font>&nbsp;(G<font class=mutation_in_codon>A</font>A&rarr;G<font class=mutation_in_codon>C</font>A)&nbsp;	aceA	aceA	<i>aceA</i>&nbsp;&rarr;	isocitrate lyase	isocitrate lyase	ECB_03887	snp_nonsynonymous	nonsynonymous	11330
3728	LTEE	Ara-1	50000	REL11330	A	point-mutator	SNP	4201664	4201664	intergenic (-246/+71)	4201664	T&rarr;G	intergenic&nbsp;(&#8209;246/+71)	arpA,iclR	arpA/iclR	<i>arpA</i>&nbsp;&larr;&nbsp;/&nbsp;&larr;&nbsp;<i>iclR</i>	regulator of acetyl CoA synthetase; ankyrin-like regulatory protein; b4017_2/DNA-binding transcriptional repressor	regulator of acetyl CoA synthetase; ankyrin&#8209;like regulatory protein; b4017_2/DNA&#8209;binding transcriptional repressor	ECB_03889/ECB_03890	snp_intergenic	intergenic	11330
3729	LTEE	Ara-1	50000	REL11330	A	point-mutator	SNP	4201911	4201911	649	4201911	C&rarr;T	<font class=snp_type_nonsynonymous>A217T</font>&nbsp;(<font class=mutation_in_codon>G</font>CG&rarr;<font class=mutation_in_codon>A</font>CG)&nbsp;	iclR	iclR	<i>iclR</i>&nbsp;&larr;	DNA-binding transcriptional repressor	DNA&#8209;binding transcriptional repressor	ECB_03890	snp_nonsynonymous	nonsynonymous	11330
3730	LTEE	Ara-1	50000	REL11330	A	point-mutator	SNP	4202848	4202848	90	4202848	T&rarr;G	<font class=snp_type_nonsense>Y30*</font>&nbsp;(TA<font class=mutation_in_codon>T</font>&rarr;TA<font class=mutation_in_codon>G</font>)&nbsp;	metH	metH	<i>metH</i>&nbsp;&rarr;	B12-dependent methionine synthase	B12&#8209;dependent methionine synthase	ECB_03891	snp_nonsense	nonsense	11330
3731	LTEE	Ara-1	50000	REL11330	A	point-mutator	SNP	4202859	4202859	101	4202859	A&rarr;C	<font class=snp_type_nonsynonymous>E34A</font>&nbsp;(G<font class=mutation_in_codon>A</font>A&rarr;G<font class=mutation_in_codon>C</font>A)&nbsp;	metH	metH	<i>metH</i>&nbsp;&rarr;	B12-dependent methionine synthase	B12&#8209;dependent methionine synthase	ECB_03891	snp_nonsynonymous	nonsynonymous	11330
3732	LTEE	Ara-1	50000	REL11330	A	point-mutator	SNP	4203274	4203274	516	4203274	A&rarr;C	<font class=snp_type_nonsynonymous>E172D</font>&nbsp;(GA<font class=mutation_in_codon>A</font>&rarr;GA<font class=mutation_in_codon>C</font>)&nbsp;	metH	metH	<i>metH</i>&nbsp;&rarr;	B12-dependent methionine synthase	B12&#8209;dependent methionine synthase	ECB_03891	snp_nonsynonymous	nonsynonymous	11330
3733	LTEE	Ara-1	50000	REL11330	A	point-mutator	SNP	4204308	4204308	1550	4204308	A&rarr;C	<font class=snp_type_nonsynonymous>E517A</font>&nbsp;(G<font class=mutation_in_codon>A</font>A&rarr;G<font class=mutation_in_codon>C</font>A)&nbsp;	metH	metH	<i>metH</i>&nbsp;&rarr;	B12-dependent methionine synthase	B12&#8209;dependent methionine synthase	ECB_03891	snp_nonsynonymous	nonsynonymous	11330
3734	LTEE	Ara-1	50000	REL11330	A	point-mutator	SNP	4205306	4205306	2548	4205306	T&rarr;G	<font class=snp_type_nonsynonymous>Y850D</font>&nbsp;(<font class=mutation_in_codon>T</font>AC&rarr;<font class=mutation_in_codon>G</font>AC)&nbsp;	metH	metH	<i>metH</i>&nbsp;&rarr;	B12-dependent methionine synthase	B12&#8209;dependent methionine synthase	ECB_03891	snp_nonsynonymous	nonsynonymous	11330
3735	LTEE	Ara-1	50000	REL11330	A	point-mutator	SNP	4207000	4207000	339	4207000	T&rarr;G	<font class=snp_type_nonsynonymous>F113L</font>&nbsp;(TT<font class=mutation_in_codon>T</font>&rarr;TT<font class=mutation_in_codon>G</font>)&nbsp;	yjbB	yjbB	<i>yjbB</i>&nbsp;&rarr;	predicted transporter	predicted transporter	ECB_03892	snp_nonsynonymous	nonsynonymous	11330
3736	LTEE	Ara-1	50000	REL11330	A	point-mutator	SNP	4211523	4211523	642	4211523	T&rarr;G	<font class=snp_type_synonymous>A214A</font>&nbsp;(GC<font class=mutation_in_codon>A</font>&rarr;GC<font class=mutation_in_codon>C</font>)&nbsp;	lysC	lysC	<i>lysC</i>&nbsp;&larr;	aspartate kinase III	aspartate kinase III	ECB_03896	snp_synonymous	synonymous	11330
3737	LTEE	Ara-1	50000	REL11330	A	point-mutator	SNP	4212157	4212157	8	4212157	T&rarr;G	<font class=snp_type_nonsynonymous>E3A</font>&nbsp;(G<font class=mutation_in_codon>A</font>A&rarr;G<font class=mutation_in_codon>C</font>A)&nbsp;	lysC	lysC	<i>lysC</i>&nbsp;&larr;	aspartate kinase III	aspartate kinase III	ECB_03896	snp_nonsynonymous	nonsynonymous	11330
3738	LTEE	Ara-1	50000	REL11330	A	point-mutator	SNP	4214976	4214976	140	4214976	T&rarr;G	<font class=snp_type_nonsynonymous>V47G</font>&nbsp;(G<font class=mutation_in_codon>T</font>C&rarr;G<font class=mutation_in_codon>G</font>C)&nbsp;	yjbE	yjbE	<i>yjbE</i>&nbsp;&rarr;	hypothetical protein	hypothetical protein	ECB_03898	snp_nonsynonymous	nonsynonymous	11330
3739	LTEE	Ara-1	50000	REL11330	A	point-mutator	SNP	4216920	4216920	355	4216920	T&rarr;G	<font class=snp_type_nonsynonymous>W119G</font>&nbsp;(<font class=mutation_in_codon>T</font>GG&rarr;<font class=mutation_in_codon>G</font>GG)&nbsp;	yjbH	yjbH	<i>yjbH</i>&nbsp;&rarr;	predicted porin	predicted porin	ECB_03901	snp_nonsynonymous	nonsynonymous	11330
3740	LTEE	Ara-1	50000	REL11330	A	point-mutator	SNP	4225047	4225047	305	4225047	A&rarr;C	<font class=snp_type_nonsynonymous>L102W</font>&nbsp;(T<font class=mutation_in_codon>T</font>G&rarr;T<font class=mutation_in_codon>G</font>G)&nbsp;	malE	malE	<i>malE</i>&nbsp;&larr;	maltose ABC transporter periplasmic protein	maltose ABC transporter periplasmic protein	ECB_03906	snp_nonsynonymous	nonsynonymous	11330
3741	LTEE	Ara-1	50000	REL11330	A	point-mutator	SNP	4230064	4230064	178	4230064	T&rarr;G	<font class=snp_type_nonsynonymous>C60G</font>&nbsp;(<font class=mutation_in_codon>T</font>GC&rarr;<font class=mutation_in_codon>G</font>GC)&nbsp;	yjbI	yjbI	<i>yjbI</i>&nbsp;&rarr;	hypothetical protein	hypothetical protein	ECB_03910	snp_nonsynonymous	nonsynonymous	11330
3742	LTEE	Ara-1	50000	REL11330	A	point-mutator	SNP	4238487	4238487	449	4238487	T&rarr;G	<font class=snp_type_nonsynonymous>E150A</font>&nbsp;(G<font class=mutation_in_codon>A</font>A&rarr;G<font class=mutation_in_codon>C</font>A)&nbsp;	zur	zur	<i>zur</i>&nbsp;&larr;	DNA-binding transcriptional repressor, Zn(II)-binding	DNA&#8209;binding transcriptional repressor, Zn(II)&#8209;binding	ECB_03918	snp_nonsynonymous	nonsynonymous	11330
3743	LTEE	Ara-1	50000	REL11330	A	point-mutator	SNP	4240745	4240745	145	4240745	T&rarr;G	<font class=snp_type_nonsynonymous>S49A</font>&nbsp;(<font class=mutation_in_codon>T</font>CC&rarr;<font class=mutation_in_codon>G</font>CC)&nbsp;	yjbN	yjbN	<i>yjbN</i>&nbsp;&rarr;	tRNA-dihydrouridine synthase A	tRNA&#8209;dihydrouridine synthase A	ECB_03921	snp_nonsynonymous	nonsynonymous	11330
3744	LTEE	Ara-1	50000	REL11330	A	point-mutator	SNP	4246644	4246644	599	4246644	A&rarr;C	<font class=snp_type_nonsynonymous>E200A</font>&nbsp;(G<font class=mutation_in_codon>A</font>A&rarr;G<font class=mutation_in_codon>C</font>A)&nbsp;	tyrB	tyrB	<i>tyrB</i>&nbsp;&rarr;	tyrosine aminotransferase, tyrosine-repressible, PLP-dependent	tyrosine aminotransferase, tyrosine&#8209;repressible, PLP&#8209;dependent	ECB_03926	snp_nonsynonymous	nonsynonymous	11330
3745	LTEE	Ara-1	50000	REL11330	A	point-mutator	SNP	4259672	4259672	760	4259672	A&rarr;C	<font class=snp_type_nonsynonymous>I254L</font>&nbsp;(<font class=mutation_in_codon>A</font>TC&rarr;<font class=mutation_in_codon>C</font>TC)&nbsp;	yjcE	yjcE	<i>yjcE</i>&nbsp;&rarr;	predicted cation/proton antiporter	predicted cation/proton antiporter	ECB_03937	snp_nonsynonymous	nonsynonymous	11330
3746	LTEE	Ara-1	50000	REL11330	A	point-mutator	SNP	4268795	4268795	55	4268795	A&rarr;C	<font class=snp_type_nonsynonymous>S19R</font>&nbsp;(<font class=mutation_in_codon>A</font>GC&rarr;<font class=mutation_in_codon>C</font>GC)&nbsp;	nrfC	nrfC	<i>nrfC</i>&nbsp;&rarr;	formate-dependent nitrite reductase, 4Fe4S subunit	formate&#8209;dependent nitrite reductase, 4Fe4S subunit	ECB_03944	snp_nonsynonymous	nonsynonymous	11330
3747	LTEE	Ara-1	50000	REL11330	A	point-mutator	SNP	4272929	4272929	454	4272929	T&rarr;G	<font class=snp_type_nonsynonymous>S152A</font>&nbsp;(<font class=mutation_in_codon>T</font>CC&rarr;<font class=mutation_in_codon>G</font>CC)&nbsp;	nrfG	nrfG	<i>nrfG</i>&nbsp;&rarr;	heme lyase (NrfEFG) for insertion of heme into c552, subunit NrfG	heme lyase (NrfEFG) for insertion of heme into c552, subunit NrfG	ECB_03948	snp_nonsynonymous	nonsynonymous	11330
3748	LTEE	Ara-1	50000	REL11330	A	point-mutator	SNP	4275557	4275557	391	4275557	T&rarr;G	<font class=snp_type_nonsynonymous>N131H</font>&nbsp;(<font class=mutation_in_codon>A</font>AC&rarr;<font class=mutation_in_codon>C</font>AC)&nbsp;	yjcO	yjcO	<i>yjcO</i>&nbsp;&larr;	hypothetical protein	hypothetical protein	ECB_03950	snp_nonsynonymous	nonsynonymous	11330
3749	LTEE	Ara-1	50000	REL11330	A	point-mutator	SNP	4280814	4280814	1087	4280814	T&rarr;G	<font class=snp_type_nonsynonymous>I363L</font>&nbsp;(<font class=mutation_in_codon>A</font>TC&rarr;<font class=mutation_in_codon>C</font>TC)&nbsp;	yjcQ	yjcQ	<i>yjcQ</i>&nbsp;&larr;	predicted multidrug efflux system component	predicted multidrug efflux system component	ECB_03953	snp_nonsynonymous	nonsynonymous	11330
3750	LTEE	Ara-1	50000	REL11330	A	point-mutator	SNP	4283162	4283162	intergenic (-231/+272)	4283162	A&rarr;C	intergenic&nbsp;(&#8209;231/+272)	yjcR,yjcS	yjcR/yjcS	<i>yjcR</i>&nbsp;&larr;&nbsp;/&nbsp;&larr;&nbsp;<i>yjcS</i>	predicted membrane fusion protein of efflux pump/predicted alkyl sulfatase	predicted membrane fusion protein of efflux pump/predicted alkyl sulfatase	ECB_03954/ECB_03955	snp_intergenic	intergenic	11330
[truncated: 5,587 more rows]
