# Supplementary figures and images for: The landscape of transcriptional and translational changes over 22 years of bacterial adaptation
Source: eLife journal article supplement (doi:10.7554/elife.81979), 2022-10-10

A

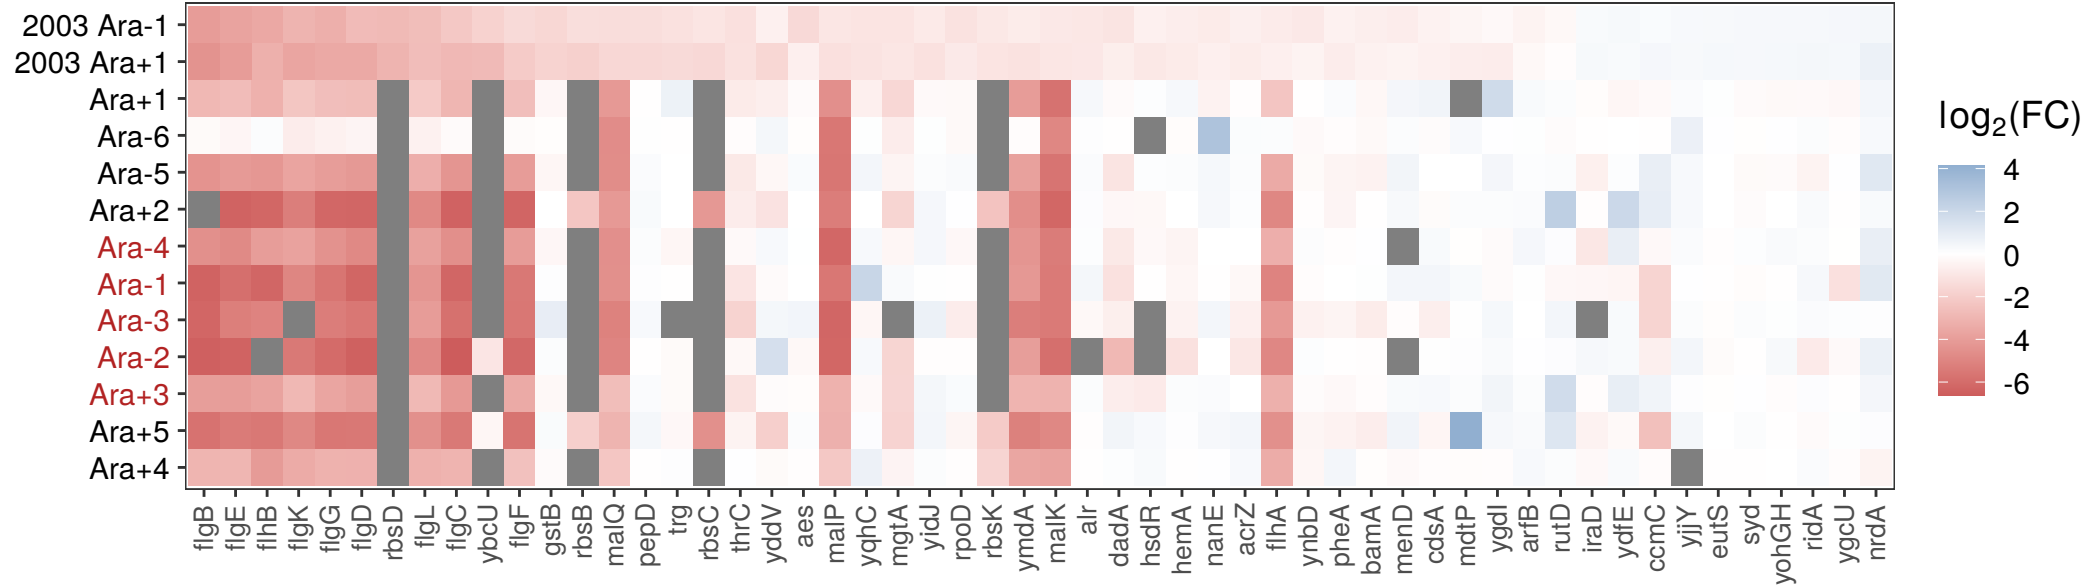

Supplement: supp [file elife-81979-supp-v1.zip]

A

 $\log_2(\text{Riboseq fold-change})$ 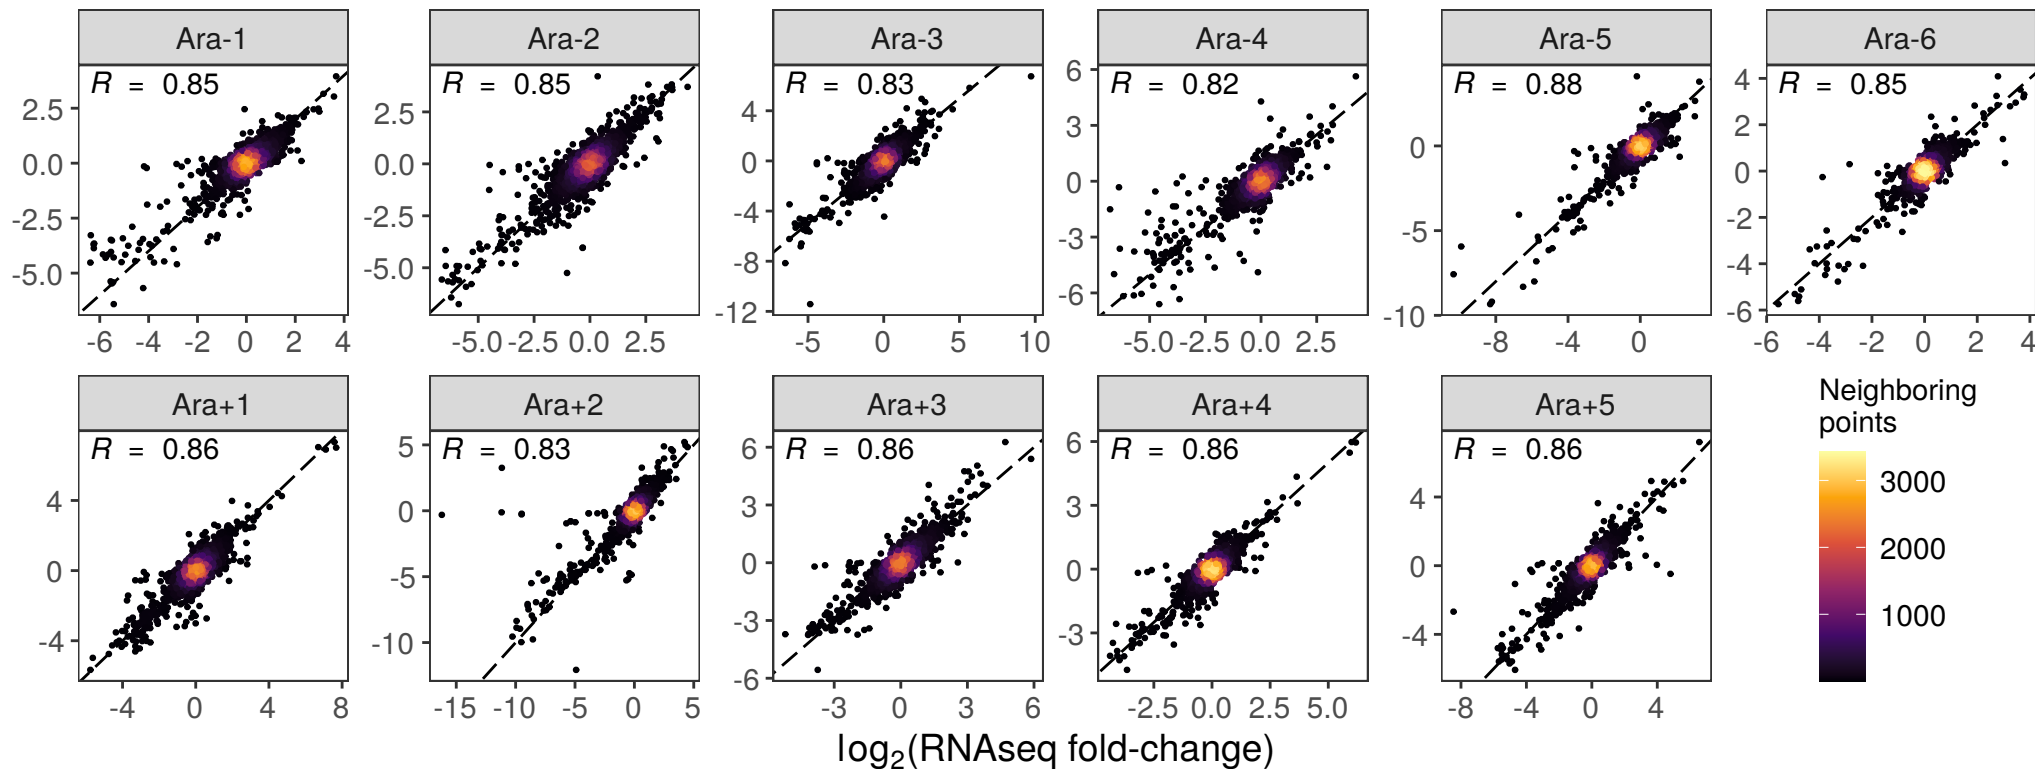

Supplement: supp [file elife-81979-supp-v1.zip]

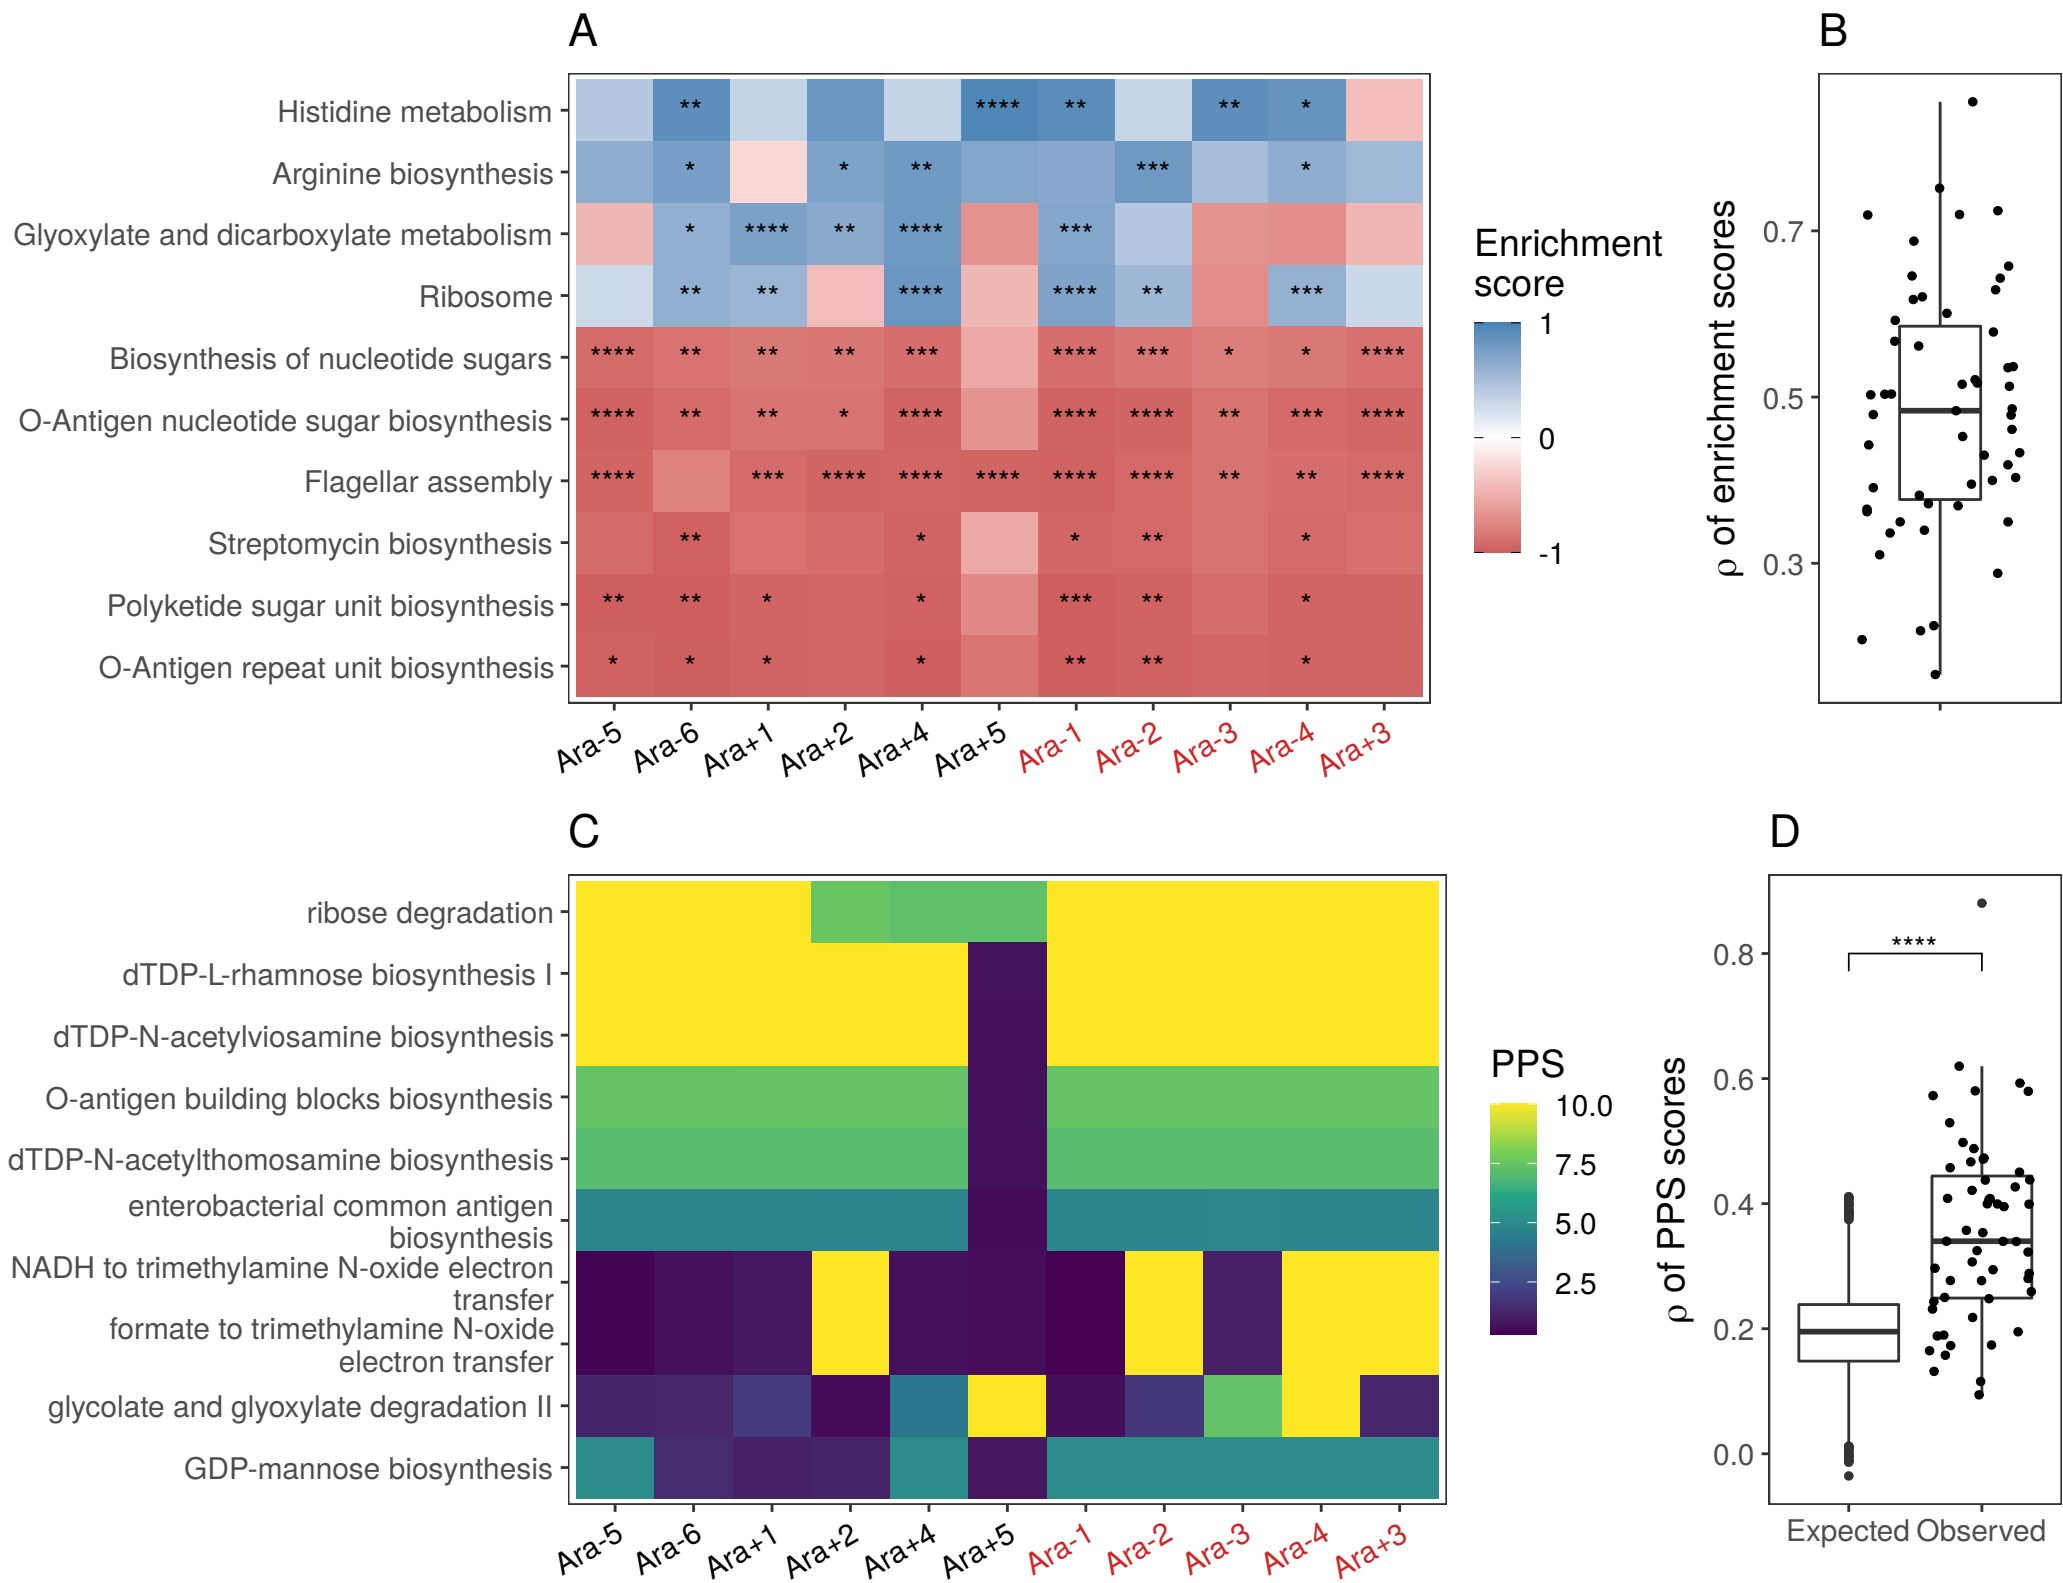

Supplement: supp [file elife-81979-supp-v1.zip]

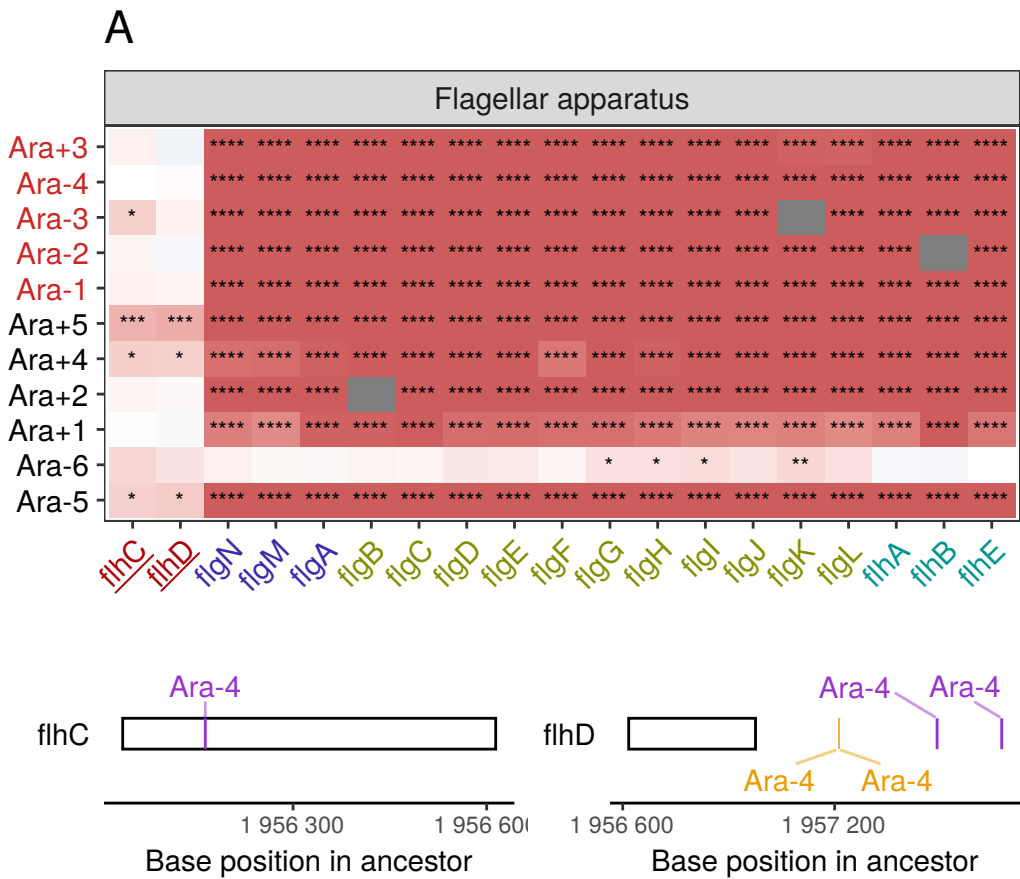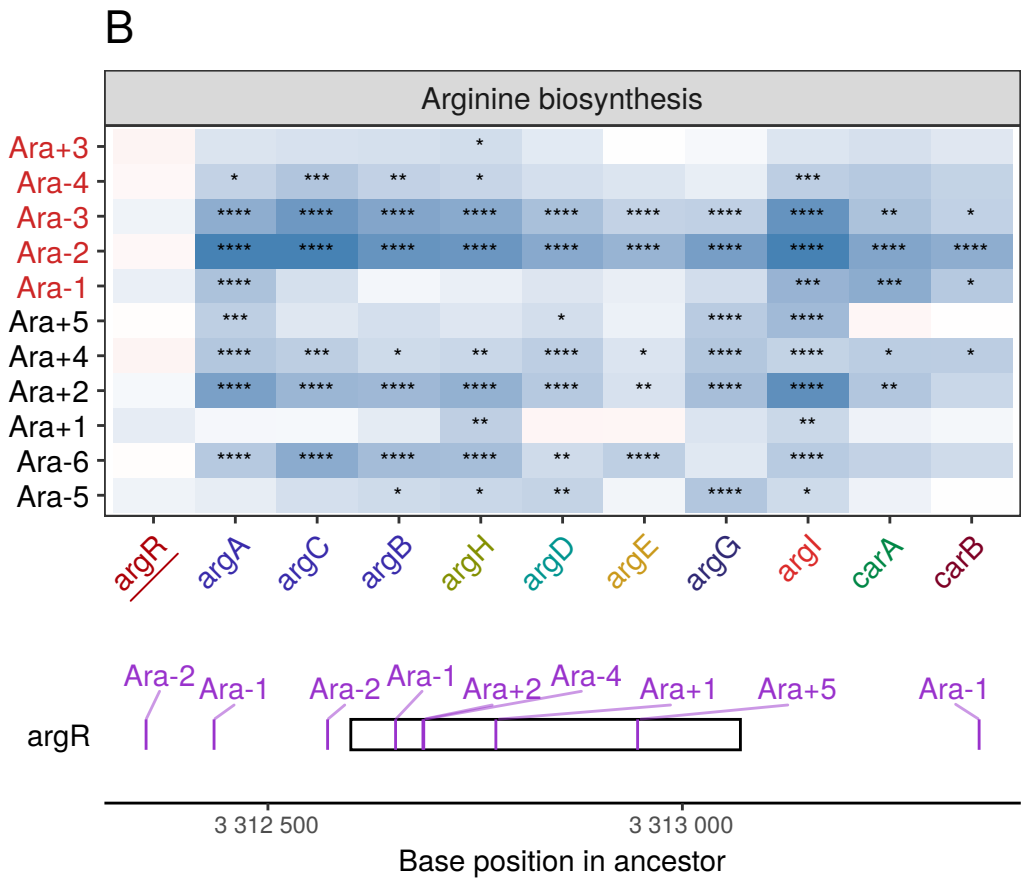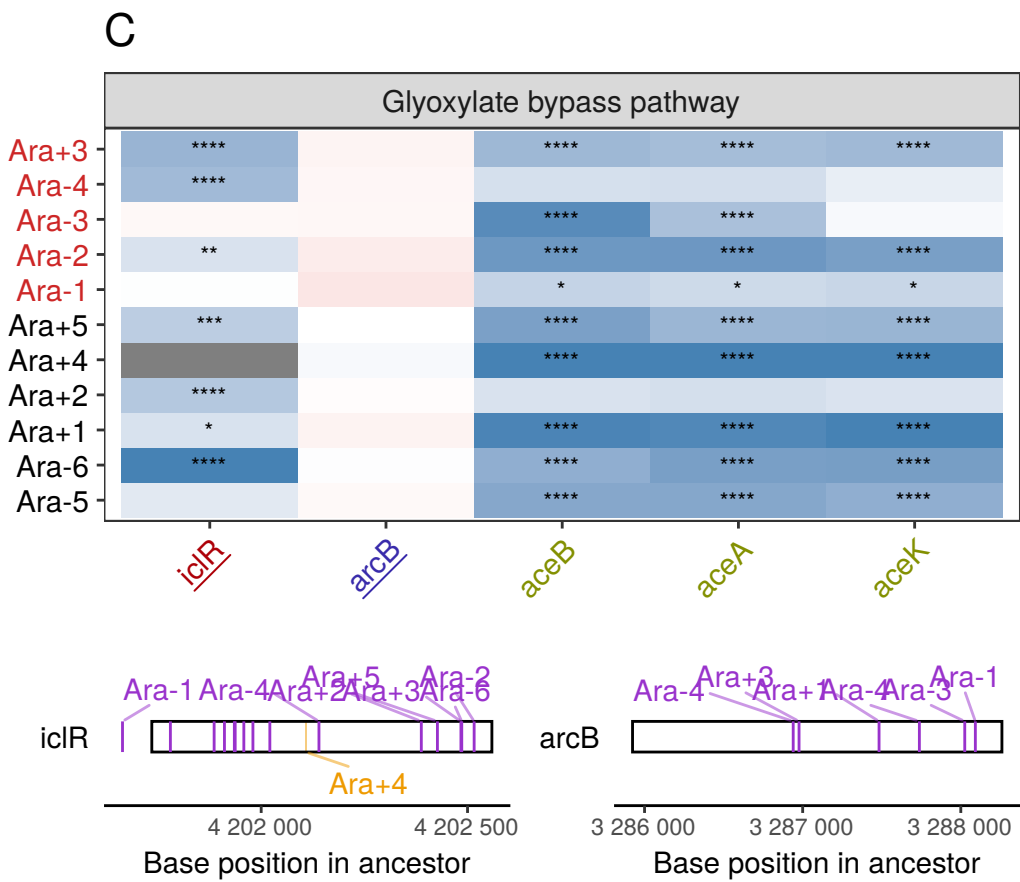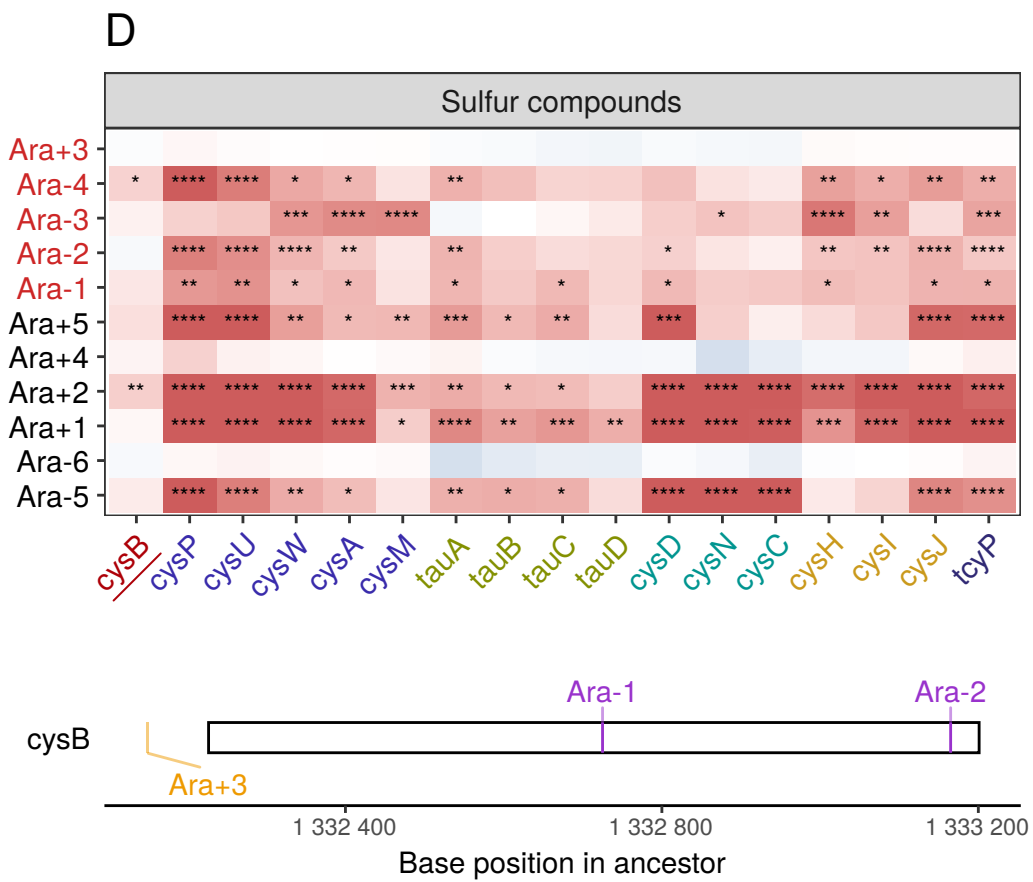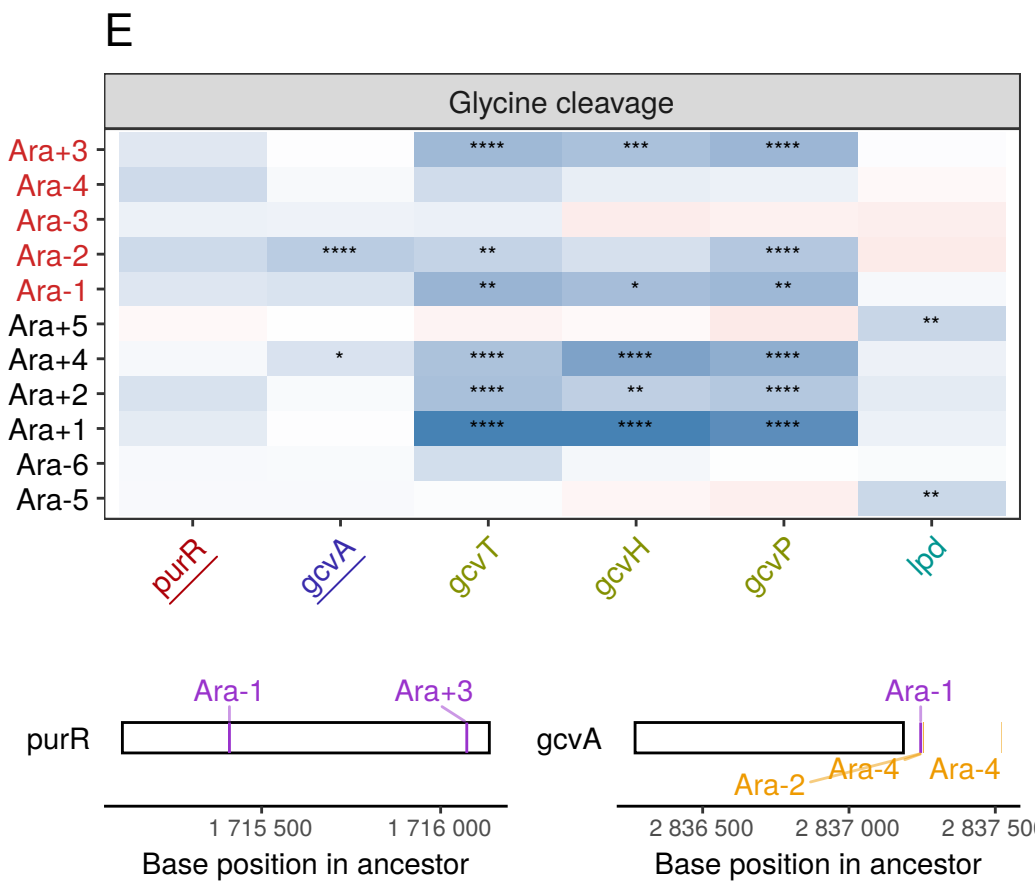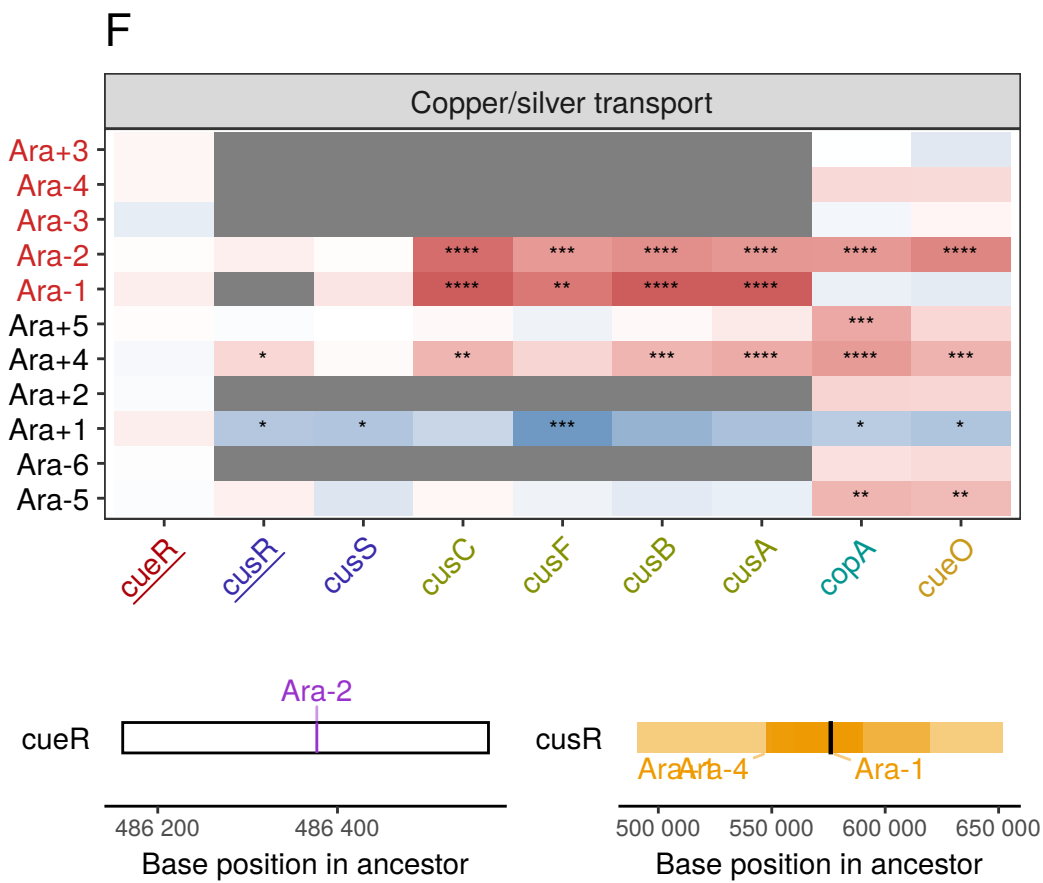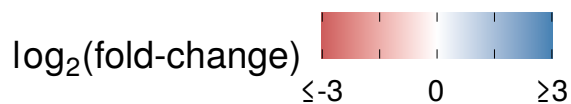

Mutation type

- Deletion
- Insertional element
- SNP

Supplement: supp [file elife-81979-supp-v1.zip]

A

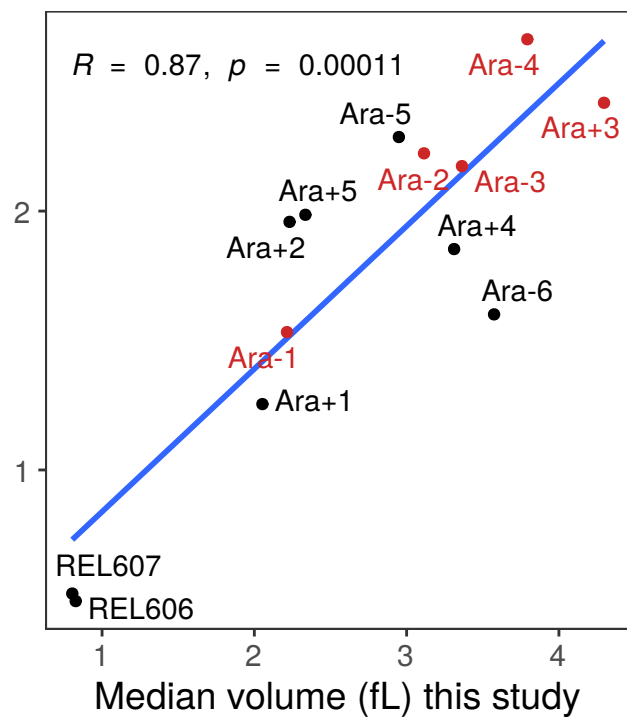

B

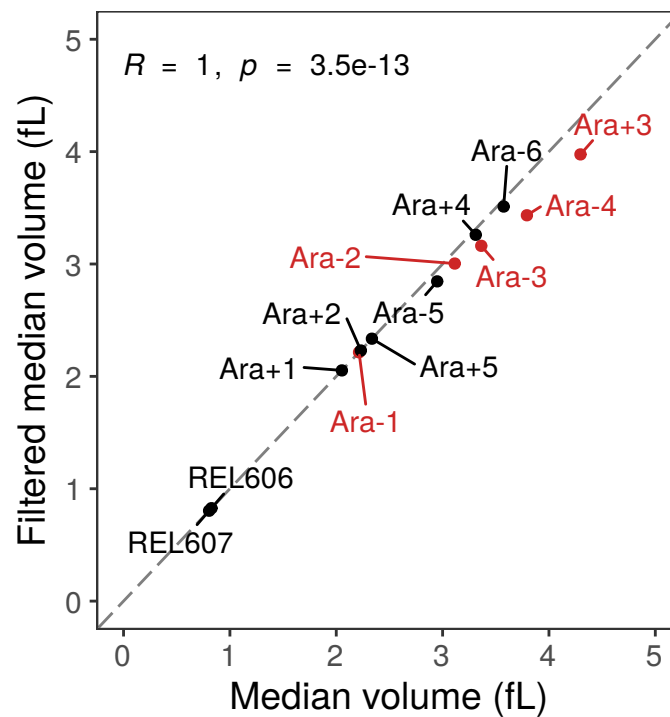

C

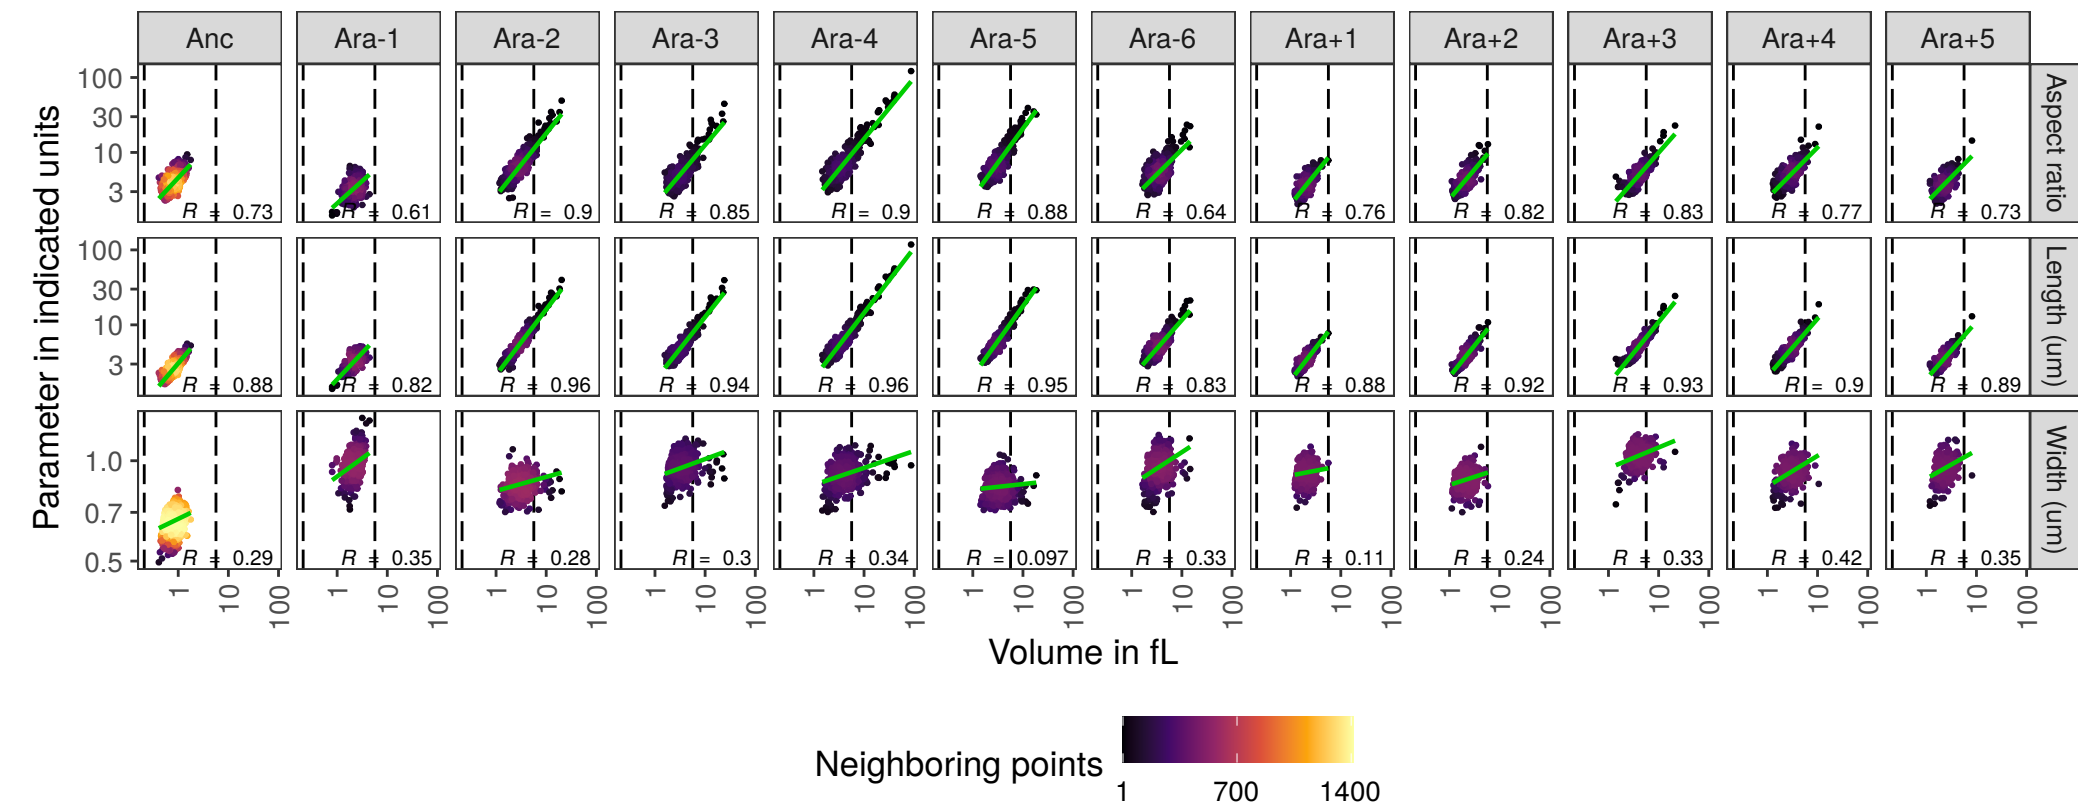

Supplement: supp [file elife-81979-supp-v1.zip]

A

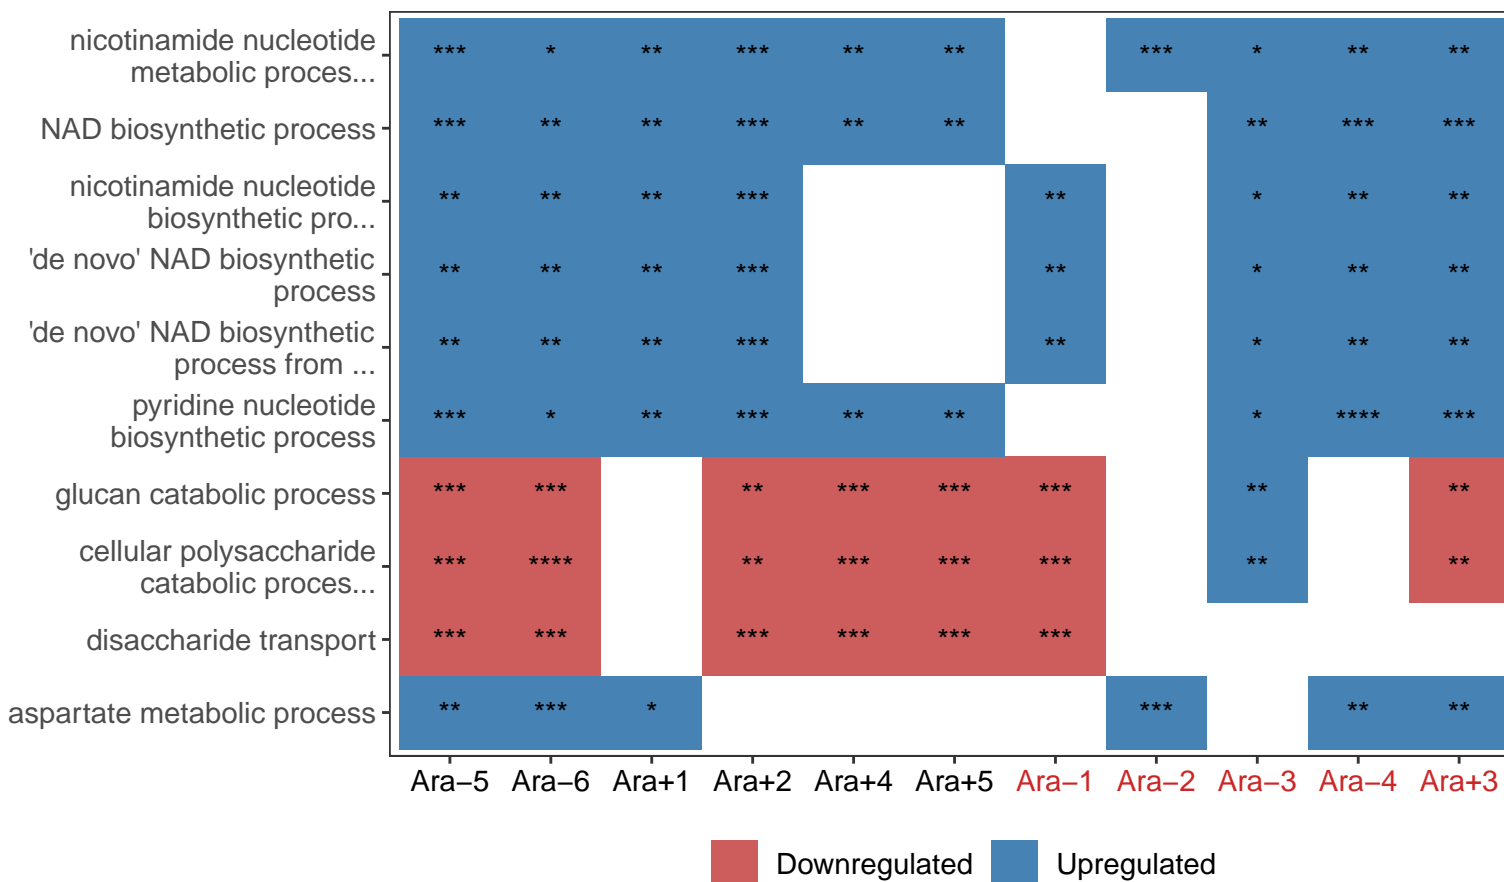

B

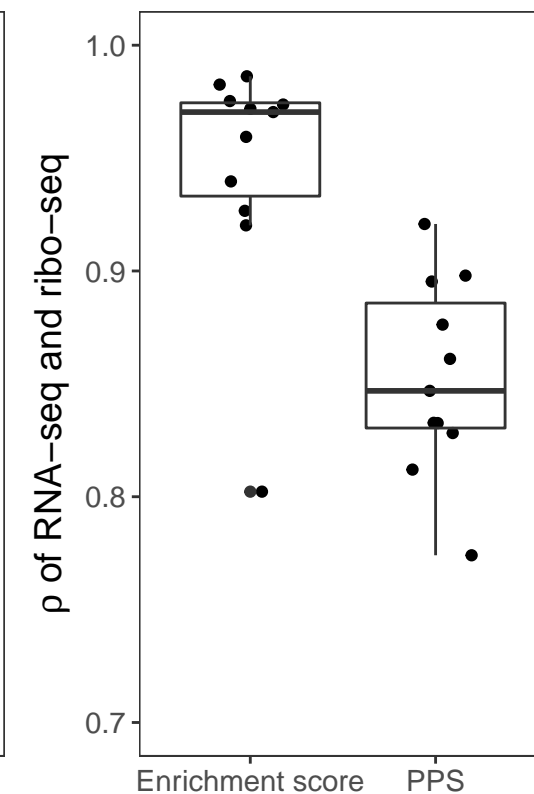

C

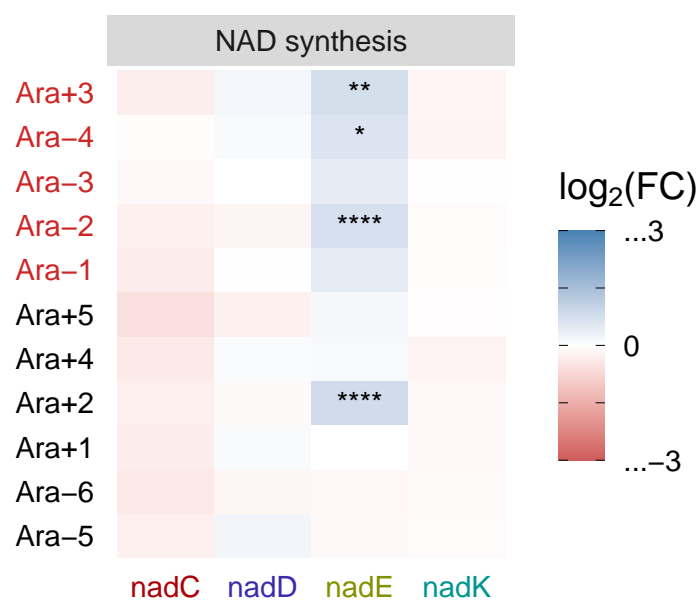

D

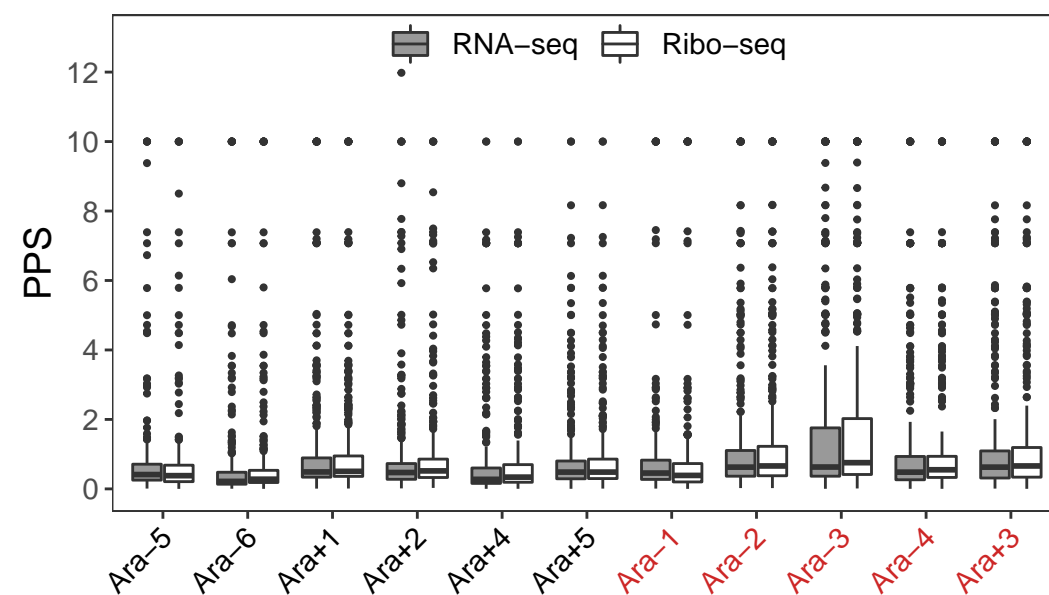

Supplement: supp [file elife-81979-supp-v1.zip]

**A**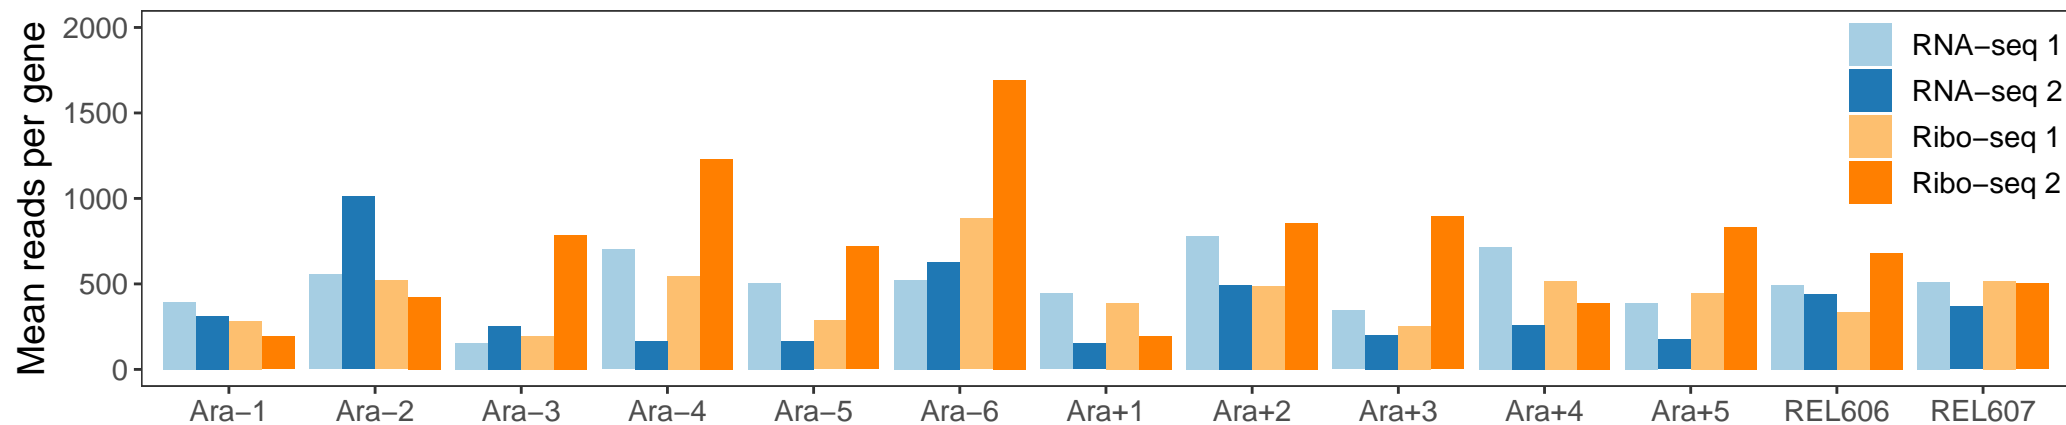**B**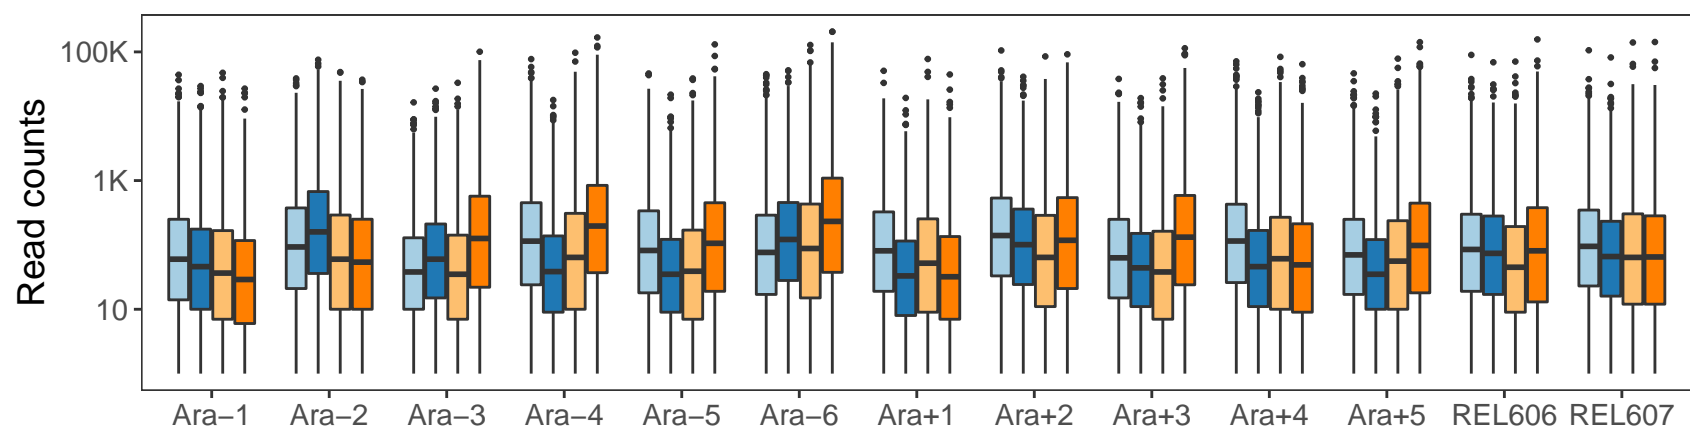**C**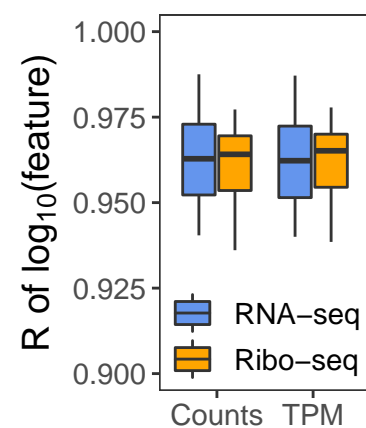**D**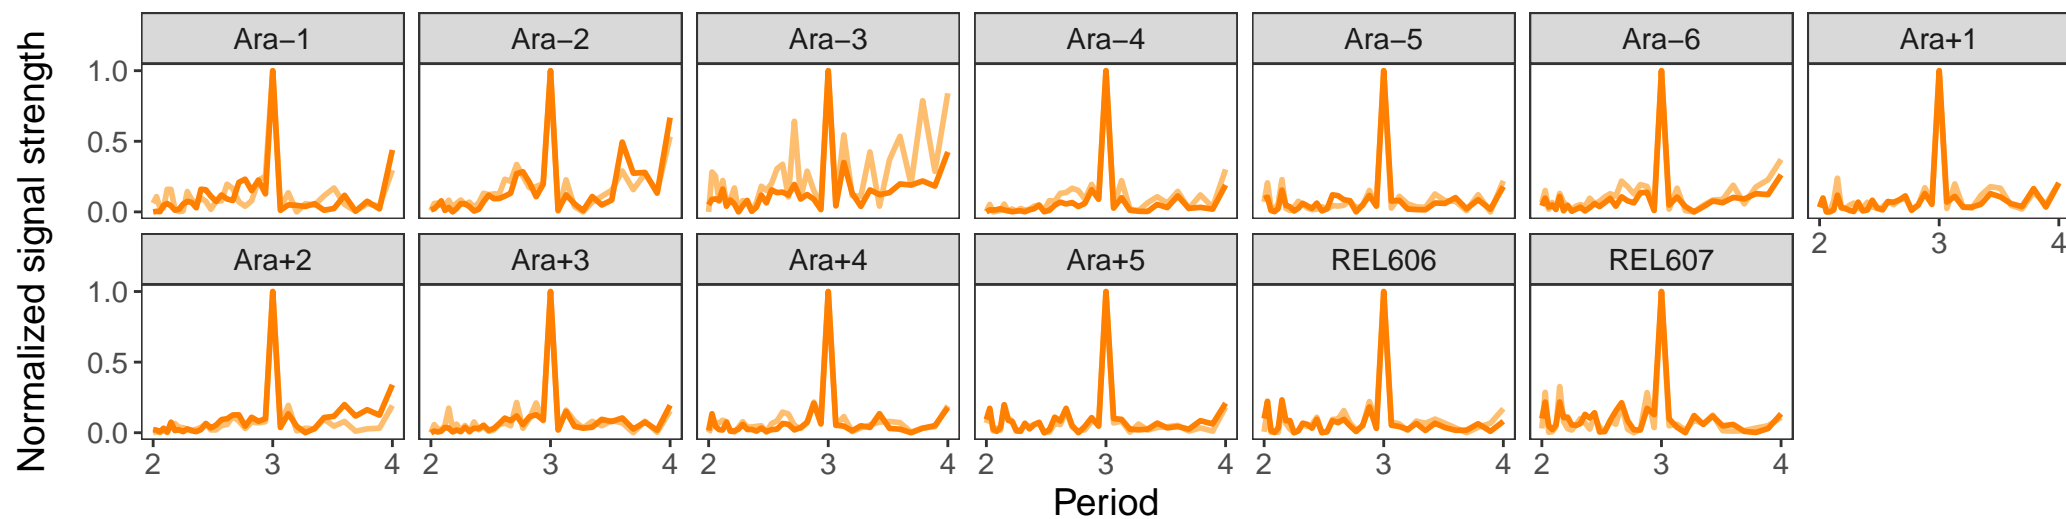

Supplement: supp [file elife-81979-supp-v1.zip]

A

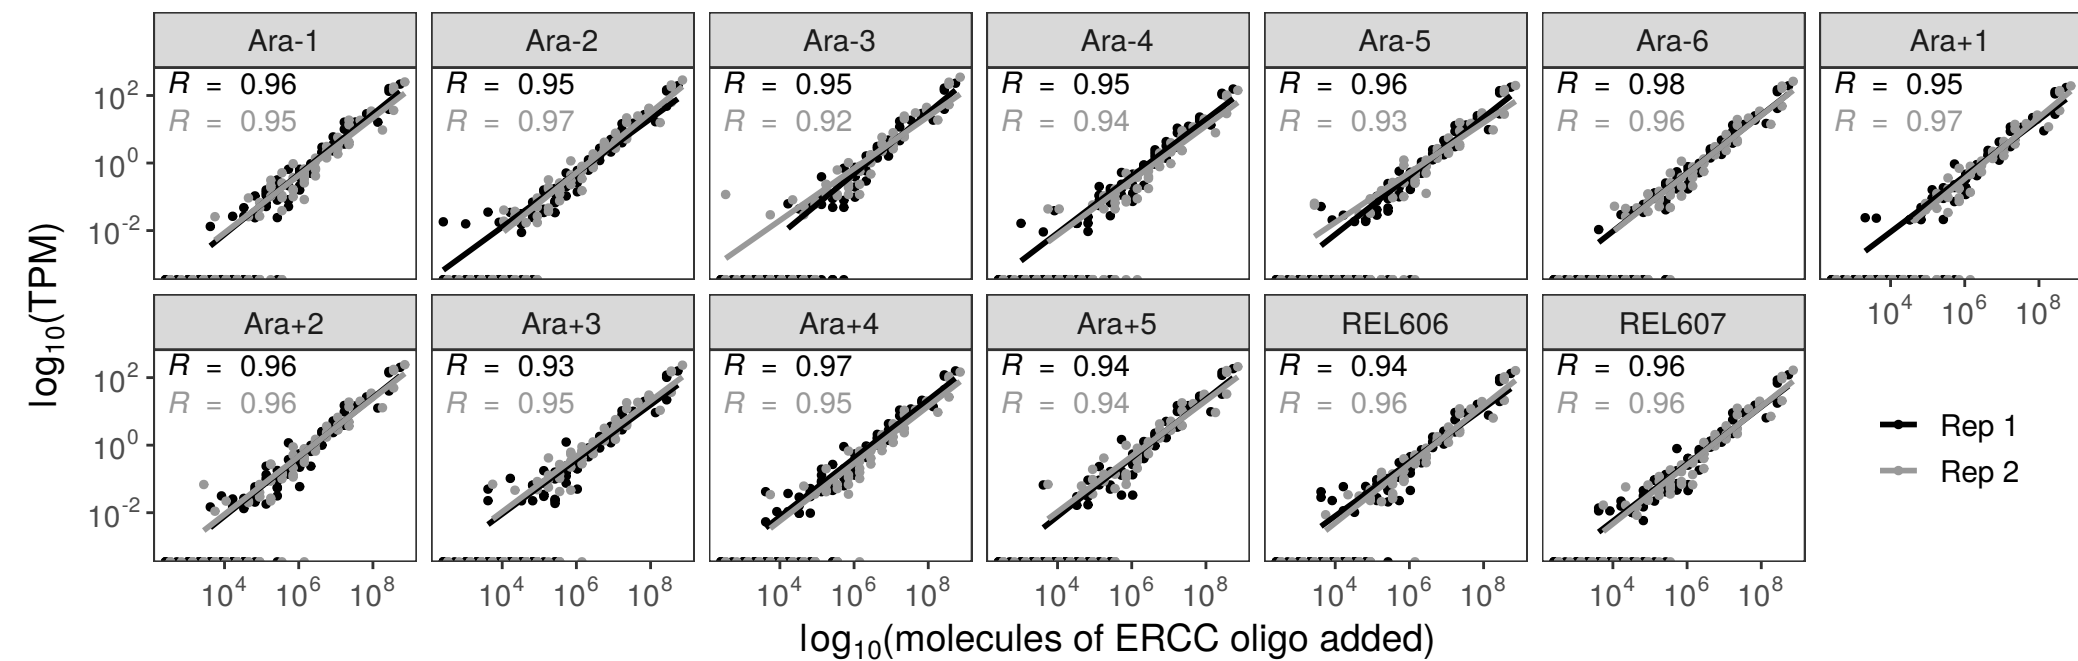

B

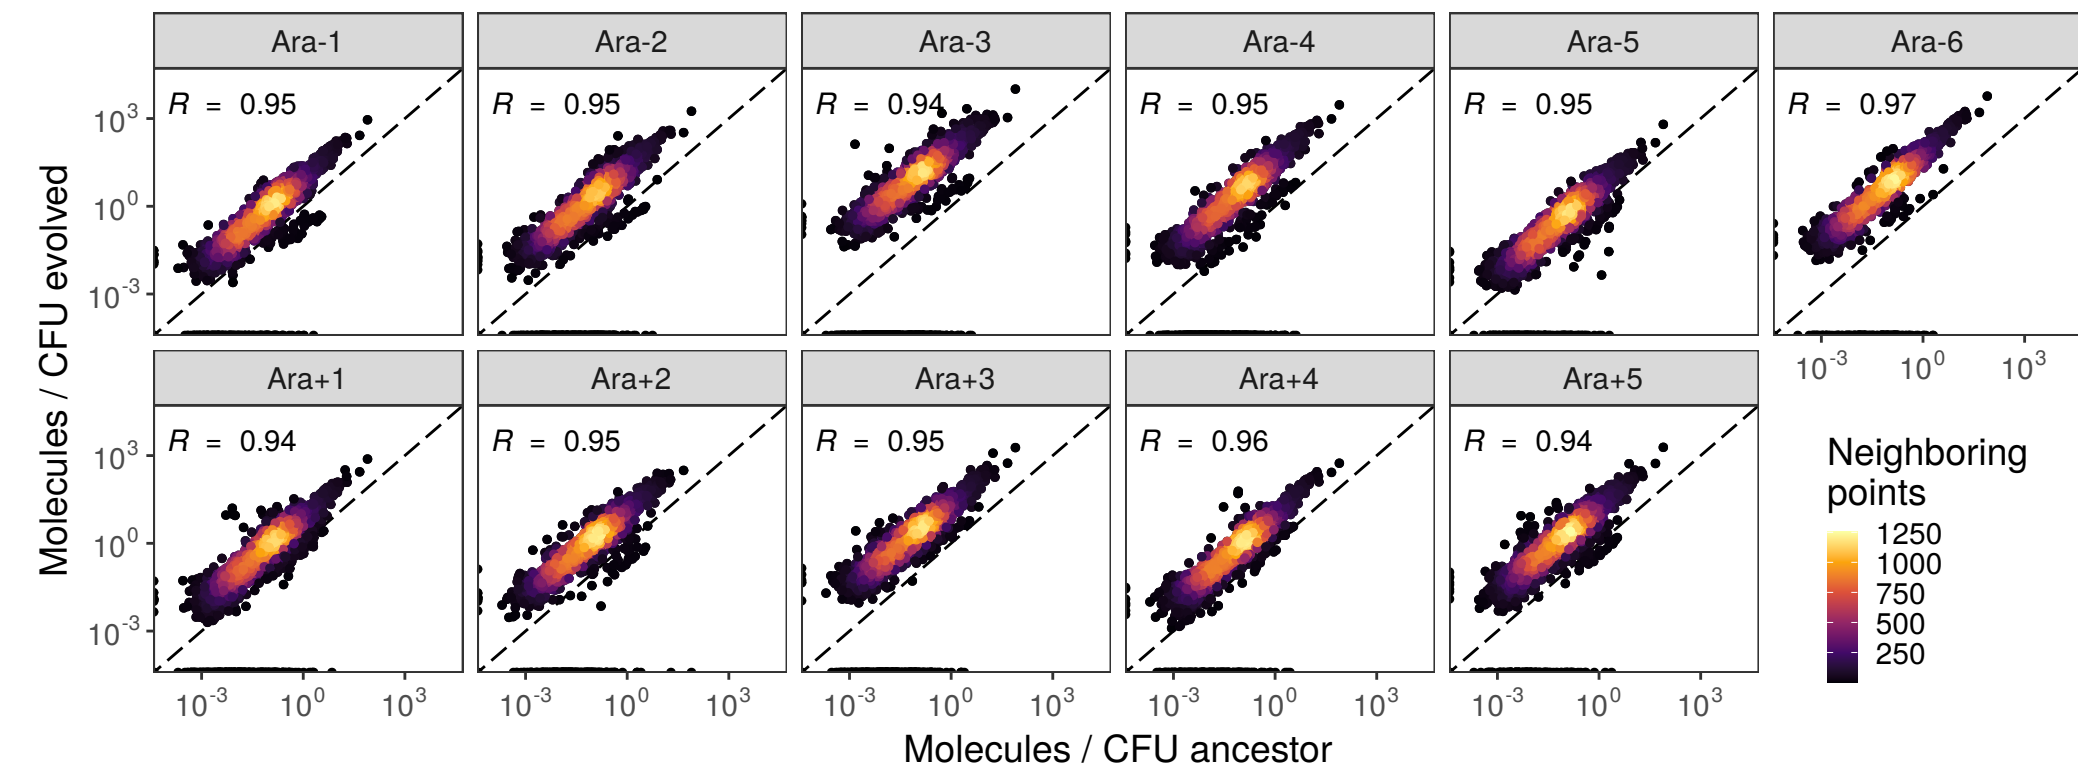

Supplement: supp [file elife-81979-supp-v1.zip]
